# Supplementary material for: Large-scale differences in diversity and functional adaptations of prokaryotic communities from conserved and anthropogenically impacted mangrove sediments in a tropical estuary
Source: PeerJ. 2021 Sep 23;9:e12229. doi: 10.7717/peerj.12229 (PMC8465992; doi:10.7717/peerj.12229)
Supplement: Supplemental Information 3 [file peerj-09-12229-s003.xlsx]

## Sheet: Supplemental_Table_S1
#ASV_ID	M1	M2	M3	P1	P2	P3
0002aae1f796feb7047d3e5098dfc7ac	11	47	0	0	0	0
00058aee008ba511fd4bc92fc4eca454	0	29	0	0	0	0
0013c30cd163717e3ba479cb49598c5c	0	46	0	0	0	0
001a59f4daedd09046ce80e019836259	31	67	194	0	0	0
002cbe5144a7bdc07aeca5ed8a732852	0	0	6	0	0	0
002fe0dd8b12b97befb3bce505b32ee1	7	11	0	0	0	0
0046d13d340b2fdf0e9daa9d222846a3	82	53	69	0	0	0
00548952e3c8de3b22d6371514dd44a2	10	0	0	0	0	0
005db3db9fcf85462c6da7e47b202975	0	0	0	0	0	110
005eb3c761cf172095735b2610fa2121	29	0	25	0	0	0
0063b07ff14e42e8c59a0db68fe64de7	14	11	17	0	0	0
00678aa47ef452172daf3ed8c35ee0cd	0	12	0	0	0	0
009443e518e9b1c124ff7b53f930a4b8	0	3	0	0	0	0
0094c1233e5234f1499d8405779c97c9	5	0	5	0	0	0
00a4975025f42148ff0f1808ebd0571b	0	0	0	0	2	0
00a5ab3879bda4420dfa95b0425da494	0	0	0	0	8	0
00ac22e76a887bc98d313ba9b4a9b7cb	0	7	6	0	0	0
00bf08eb7bfa781f35cdd052372d6102	33	0	32	0	0	0
00c385b61235c52fd6bd879c5372f59d	0	0	6	0	0	0
00e17cd4df16c1af9d1c1619bc187c3d	14	0	0	0	0	0
00e4b6ccb9cc6a81ff0967f14818dcb8	20	0	0	0	0	0
00e696d0a9a234eb83883a0d2470abca	0	17	0	0	0	0
00f469a8514c15196bc5b477ad24bee3	74	0	80	0	0	0
00f5f09b91f5d4406f382abd76ea4ed7	15	0	0	0	0	0
00faf859b5c99b0f46693316e9605a37	6	0	0	0	0	0
010aaf512e4b839ecd1dfe96da8fda87	0	27	0	0	0	0
011c3685a74e1d76fb4ad319b5e5c2df	0	39	0	0	0	0
012130cb647b33221ebee448158f3dc9	69	143	28	0	0	0
01273f7c7fa2f451c15f00bafb35c2e6	0	0	0	2	0	0
012f3a4fa37df7ab438585b011db4b90	0	4	0	0	0	0
0158ad9ca464940817818ce17f6f44ba	19	23	34	0	0	0
01623bfec46584b9590c2ffc96dfdf9c	31	40	45	0	0	0
017706fe68d8a68c8d64fb37d806125a	48	74	24	0	0	0
017b682d0f974b4a484891f55a16a42c	0	0	10	0	0	0
017cc45b8c7594c8708742a551093a75	0	24	0	0	0	0
017f955d57b66a18d5c7d5ce14ce5393	5	0	0	0	0	0
01932cf0b6cb03f8f2111a0ad8293816	0	9	0	0	0	0
0197ab63e3ec518a64bd86c0e9c7b6e0	28	9	0	0	0	0
01ad2791611387b1d77eac520c2e9fe3	0	7	0	0	0	0
01b0bd9a4a6592540d968ca2763047f1	0	20	20	0	0	0
01b14f0b4cd38e5011cfc5243c38d597	22	0	0	0	0	0
01bd0b7944a4cf4747e14fdd9b5bb1eb	0	0	0	0	0	146
01c7f5141d6e1a9b00ab5edf37db2b76	0	51	0	0	0	0
01c8258fe5071472144f4bc60d2f0823	0	12	0	0	0	0
01cdcf8ac7e4d1f33356bd10bada2a23	0	0	15	0	0	0
01d32fbfd685a6df5d5ebe86b2bca6fc	57	58	78	0	0	0
01de1ba8287799a3aef50b25bddd9149	10	51	24	0	0	0
01dec9f0f3f4879816573994ce22b738	13	12	38	0	0	0
01e1b29c62c87efe2df2d5e4723b553a	9	0	0	0	0	0
01e5209cfe2431a7e67ab5e38c57d152	56	11	18	0	0	0
02008307d30369fef626f30f89deada1	0	0	0	2	0	0
0208c1fc7419c54a07327766908b5da3	0	16	0	0	0	0
020ab9e7131d30cd88369d14784eccc8	0	0	0	0	263	0
020ecd6e881c2f300c4c0dd262ccd641	27	20	0	0	0	0
020fc47ec014afbe06851c4a7f3e90a1	0	0	30	0	0	0
0219129f48b8f4f9802ca1777b0d7c96	0	24	0	0	0	0
0221d35fbf3fd1baff0bde9d7af25252	28	0	0	0	0	0
0222361c224ff6c346f5ed82c3fab0d3	55	0	0	0	0	0
022740157443664ea6bac2d126c2263b	0	0	0	0	0	19
022e852026362c3ba1dfcb61307f74f4	0	19	0	0	0	0
022e8a104e35d69ab0a51804387130ea	0	23	0	0	0	0
022f202150f1a0ef09659d2fd8e55730	0	11	0	0	0	0
023d4bda976a56096d517452367eb8ce	0	7	0	0	0	0
023e8794a813e46ada492b668569b34d	16	0	0	0	0	0
024297a242c94102a428d21827d889e2	0	0	0	13	0	0
0242e9db67c7b7776f27ab2c1bcd1459	0	16	0	0	0	0
02459e77d42b38a4ed8ba7cca3b63da0	0	10	0	0	0	0
02478273d93eb7617dfbd6f6c469a36c	0	0	0	122	0	0
02521a9f37c6122c5740765999ea726b	28	21	19	0	0	0
0253a14e3526fc69bf6027dc63b45a9e	0	6	0	0	0	0
0253bd51774e1230ad7033ad6b6b1817	0	8	0	0	0	0
0259f2bd2e77240305cbffd607a39131	0	0	9	0	0	0
025ab70524759b68a8e78706145c6a46	0	16	9	0	0	0
02609517a294f8bf3ea6d2d19181ec7a	8	0	0	0	0	0
026689a42ef3f2a1c0c3bf81fd833b9c	0	0	0	12	0	0
0273e9fa07b839d7c5dbdc1a7771d1a3	0	11	0	0	0	0
027e0505cc3f893826625c84b01d50fd	7	0	10	0	0	0
02858539617287d968954de2d1b4f3e6	0	7	0	0	0	0
02913c4497258d89eebfc05cbafe19ed	0	0	44	0	0	0
0293610dd449c69f892aa099ff961aff	0	0	2	0	0	0
02a88b70661c37026ae52c27b8b0d37c	4	0	0	0	0	0
02aadba955e24054c0eb7d803b479b2d	0	0	0	177	0	0
02b71ac26b83a505b5f3d316b612498b	0	0	0	65	0	0
02b91d4b4c9464a013d05b135039ae6a	0	14	0	0	0	0
02c1d6e3d54019ce8631d9399325d45c	0	0	0	82	0	0
02cc1637b1292007f2faab3e2e9bad8a	0	0	15	0	0	0
02d72b28728dc0312dbba359c2bd722b	0	0	5	0	0	0
02e3b84dc689bf05238e820d25fe7cf8	0	13	0	0	0	0
02eba03b910830b2b6141c14da3c1b62	0	0	0	0	0	81
02f0f8430d693d0269e37da262fa91ab	0	0	12	0	0	0
030b4b75041d06e9bca9d2a088399b8e	25	0	0	0	0	0
031d572ff3f38f6f46a022e7f5118e27	0	0	0	0	161	0
031dcb6ecfa2a0e622ea4b97cd0d3bd4	11	0	0	0	0	0
03220ec7b2059cfbf15525c23f578caf	0	16	22	0	0	0
0324b398bfbcfddbbbefcff306c9daf2	11	12	0	0	0	0
034682fbe10b71330643151f8e64fff8	0	0	0	0	5	0
034c4d36c50a0d79877007d2542fb3db	64	74	60	0	0	0
035080cc8a5a8d11cfdb867fb587c5ff	94	61	212	0	0	0
0352db4538f505ba7af7efcf3fd5a9a3	0	0	0	16	0	0
035a6fdcecce92ca32313f222936d889	0	0	0	126	0	0
03645608e7e9f0de7e9b18565f192755	0	6	0	0	0	0
0374e149116d3a4551067d415e48f2da	50	16	8	0	0	0
037fca6f67561d3ffc6157996b318612	0	0	0	25	0	70
038545bdacb8053d3f6240ccd86848bd	0	0	17	0	0	0
038c3b5d50bc337c613e37fe45380cd1	22	36	32	0	0	0
038d26a804b454b83d0f6adf1bb8efb9	0	20	0	0	0	0
03bb2aff134374154e7c738a8bf372ce	0	0	21	0	0	0
03ea49ad81440286f3ddb285b017de95	0	0	8	0	0	0
03ec2d477f63b618663cc72b5667129f	125	0	20	0	0	0
040940ffd60939eb9a0f77f999780c90	19	0	0	0	0	0
040b1ab5b026b8b7c77744cb29c6ca7b	0	27	0	0	0	0
041ce9f3c29a4c19eb21ad8e64b10197	0	5	0	0	0	0
042356a8febc16a9c600aa12953a2cb5	0	15	28	0	0	0
0423cc051d197ec30b607eaf16ab1d42	8	0	0	0	0	0
042a34008cf5c124003540e4a0af5bfa	0	0	0	37	0	0
043f442881b334575302de070082a429	14	0	0	0	0	0
044fa4294c161436547495ca164a8cea	0	0	18	0	0	0
045933ae231365012a7a4e2692ad9e74	5	0	0	0	0	0
045d523663988c3a83295b90dbf5eead	0	5	0	0	0	0
0468e1b85683e28e8b801226bd2afaf8	90	48	66	0	0	0
046b64ee9b5bd646cc01f7a2fb693de2	33	54	61	0	0	0
04777c2dde09647cd6bd36ccd200b856	0	0	0	0	8	0
047f16f3b08dae386d4ec5a89981693b	20	33	22	0	0	0
048885f629d4e04b83d67b4c97ab3880	37	0	0	0	0	0
048a795a4aec9680231882731d093c5d	45	0	0	0	0	0
0491937bcc1f0e64203048b3a383bacd	0	0	9	0	0	0
049fd42ecc012118d91837a32e21c787	0	11	0	0	0	0
04a75f1199d1bc6b58d19dd8aeb24520	0	9	8	0	0	0
04b3d49d420a647131e9f130592dd0d5	0	0	51	0	0	0
04bb131062efd87042484911d42e8804	0	0	4	0	0	0
04c0c66a5c8a811813c72ce8e8218a5d	62	36	44	0	0	0
04c326d6666b3b2d55572049c0b9e8ac	4	0	0	0	0	0
04c5957714575d00e8132521448fa7e8	0	0	0	0	0	2
04dbc4b09ab6e76e42ad87387365eb56	24	29	0	0	0	0
04e8ddef228c33604a1f2d2a88968381	0	0	5	0	0	0
04ebc4c12bd4a662451f560ece14fd04	0	0	0	0	16	0
04f37f5453a027eda81787db0c416659	0	9	11	0	0	0
04fa6f631e4be7a031c89953987426ee	0	11	0	0	0	0
050fb7e239553873da4d1e6e4dde7fee	0	0	0	0	0	65
051e129d8c32d9a68185c8515f859e05	17	0	0	0	0	0
053ce39472a9d6549d722efebf1dd0fd	0	0	0	0	184	0
0551f45a9b4d25795e004e6c1e059a81	0	4	0	0	0	0
0555280973030494eb39c9a1fa37b6d0	17	11	12	0	0	0
056d1a8b8582b0b38ff8235d766d7bda	0	0	10	0	0	0
0577cb80e070768ac2ccba4b8d1d4d1f	0	0	0	0	0	159
05787157f7cbfc4f5e77192c82d8bec0	0	8	0	0	0	0
058b962fb7ab76b537ee710e8be5163f	0	0	0	0	0	108
058e25b30637fd63b2f8b975aea51a27	16	10	0	0	0	0
05a86374b502a13fbbb44e6ab1fb1c07	0	39	0	0	0	0
05b61741f81fa651010cab24f1be5f63	61	51	41	0	0	0
05bbde4af0797632e5527572ca40d579	0	0	21	0	0	0
05bcedd62f6071ef8335d97cc5938b8e	0	11	0	0	0	0
05bd4fbbd8d04ee65bffb0632afcf31c	24	30	23	0	0	0
05c04680d80a9986e32ebdb16f94a5ac	2	0	0	0	0	0
05c6ffe5abb0340b3335882dfba83757	0	30	0	0	0	0
05c851ebbd91617e30d49b0e5fc042dd	0	0	0	4	0	0
05c9b65ba6707880410c7255f6a0004e	0	0	3	0	0	0
05cbb92e196058e8c099d96ff457b26a	120	94	122	0	0	0
05cf7655d6032e401987c67229f0d678	0	0	0	0	0	9
05d2e8ed7eec1387355fd251e255abaf	3	0	0	0	0	0
05d971dbbabc8c27722edf09bd59016e	0	0	11	0	0	0
05e4559d8f8942f6cb57f5a6f97ed38c	0	37	0	0	0	0
05e5b08e1faba46438269d2a5909578a	0	26	0	0	0	0
05e6035f1b44a64025ad600b7546fe68	14	16	0	0	0	0
05ec81177eec981008c7129b7fb77424	0	0	38	0	0	0
05fe13d056d2f6da01a62c7587f943dc	0	0	0	0	0	446
0606ebe9b0ee90d87e0d06e189abdc3d	0	0	0	0	0	49
060ad96fc28c7ca21eb296818b526557	0	0	0	0	0	9
061ab1d586d9123b376ddef4525f4524	21	15	25	0	0	0
061ad7bb0e696a8ef50f1db2faad252a	0	0	0	0	0	37
062e4faf3eebfa43d34dd00de7e50c99	0	0	0	0	111	0
064122535155d5e9c909b153ed3fdeaa	0	0	0	0	110	0
0652dc8061251fb8f09535e7f9bdda8e	62	46	46	0	0	0
06772718ba11414fa3091d734674ee32	19	0	0	0	0	0
0680161c41ec5f5a966883d542d7b9ec	0	4	0	0	0	0
06830211cbfa407a51c56be05fa94c43	0	12	19	0	0	0
068a267292193477b88c3a5e92f5f838	19	0	0	0	0	0
068d22245f1db8a5ccd9863153f26fed	9	0	0	0	0	0
0698768bc74b0c91ca1c9939572e7557	0	0	0	0	6	0
0698cc19588fe9e7b597fa509b384049	0	24	0	0	0	0
06a1b9774b7df37b3ac6fd41492a472a	0	0	0	0	3	0
06b78dde21da7edf0b6f7b9832435ad3	0	0	0	4	0	0
06c67d40409c0af8a3ac12cd80c9c340	253	73	257	0	0	0
06c7e1a6d2977162b43b790d50337f48	0	26	0	0	0	0
06cf4564dfc449837e4e34ebd7bd7485	181	134	287	0	0	0
06d2cd6b586fb62b34d1774824d1c96b	0	0	6	0	0	0
06d80ed875606b637e3c4591d440cd7c	207	168	216	0	0	0
06fac800ded50a0238e33567995c59ac	0	0	0	0	8	0
07025f2ca4e7bbf3d107c9c293652296	0	0	0	3	0	0
070d3114ba88111aab9721610f815dcd	32	0	0	0	0	0
072b5191beedca2d7a9a5716ad6d28f0	29	55	32	0	0	0
0740e13e766b60fb35681cf3405890c3	0	21	12	0	0	0
0746704d755358189eb5087afc00cc20	0	0	9	0	0	0
075696ffa86c475f14a1e961ca78f823	0	0	0	0	106	0
076ec34d007827e1ace66ccfb98172de	0	43	0	0	0	0
07726f9bdc2ad3602f3cdf64ecdcc63a	5	0	0	0	0	0
077b810e4e445f1b8949f97acd701e3d	0	0	0	0	0	21
077c721d3e522e25b70d2704b8752ce6	47	64	64	0	0	0
077dead996192d9e44b53196116c074b	0	0	22	0	0	0
077e2089086bc7e83e3d6066e2583308	0	0	0	0	204	0
0782005f6c1100d9004d33e05a3652a8	0	0	0	39	0	0
07891632520ec9fc0777f5e7a1e104c0	0	0	13	0	0	0
078f3c357cd258134fa421d9b4f67be8	0	0	13	0	0	0
07c057a0f632a581c0fa57de99ce86ad	3	0	0	0	0	0
07c127f9b8177c30843a4ffda90b658e	0	0	0	0	0	28
07ccd02cea786100d9e4168211ce6376	0	0	22	0	0	0
07cdbc82514af52935a53575bab422da	80	79	75	0	0	0
07d0bf9b4dcfda758569922ccef30064	0	47	0	0	0	0
07d7309d08ab72156f310aa322d0a3e2	8	10	15	0	0	0
07f0b25935d2f97d4e32873a5c33dac9	0	0	14	0	0	0
07f2b593e9fc8ce977832b18cc082be1	0	0	14	0	0	0
07f8e64607f6d01b95bb8b20f7a998f5	0	0	0	15	0	0
07fe23ed117844aadf8f837b5f61edd7	0	0	0	0	0	32
0801234ee5c08da74929d55b4f0f67c5	0	0	0	0	12	0
0820a50cb074b8b6e0d010ac74fe8a47	76	31	0	0	0	0
082c79e1acf97e963fcabe4273e59028	0	0	13	0	0	0
083543c7aa7a0a2d24caf610cec12c28	27	0	0	0	0	0
0836bbd46a50e1e391f78a8afe69b2bb	0	0	0	188	0	0
083904b319a98539bb75507f068f1dd0	114	0	59	0	0	0
083da977e5b31ce6a485badb7b11d590	140	31	46	0	0	0
0841dca5d350cd627b1daf11549633e4	0	0	3	0	0	0
0844e020fb75cf2343236f0e9d8ff3f1	0	0	0	298	0	0
0854ee4273f18dc62a012545cf56f4f0	0	4	0	0	0	0
0856052fa3790bde2fdd6a952a85fd44	23	0	42	0	0	0
085783c4645bfcb324ea7d55812460ee	0	0	11	0	0	0
0858be39bf811ca1608f058d08fa08b3	0	0	0	0	31	0
086224dde01b47975e0fe056b05dd13a	41	0	14	0	0	0
0866a8b1fd641e0489ad5a2feda91a51	0	5	0	0	0	0
087b764bfc83e385815329e6356142ab	14	0	0	0	0	0
08816b5525c1e05bfcd42158e20dae8b	0	0	0	0	0	43
0883d9dd6caaa1c0fabf85313efc3395	0	0	21	0	0	0
089a096fd1442525b06d67b09ff5170b	37	57	18	0	0	0
089c32074d996a1b330c0e55f9772642	11	0	0	0	0	0
08a58d188b436879fb8d50e4fc0d74fd	7	0	0	0	0	0
08ab77dae01a73e9d3641c6fc03fd62c	0	16	0	0	0	0
08b73eced9008b1f41387f308b918692	0	0	17	0	0	0
08d00112f277759e77c936f8c9e94cc2	0	0	7	0	0	0
08e5996d843b3203b06163edc542cdef	0	0	52	0	0	0
08ea7add05d046681ccd4c922e43e159	7	0	0	0	0	0
08ec16f234f15d5d5ee581e86344b536	0	0	0	2	0	0
08f2864f143604f2434fb7fabd954190	3	0	0	0	0	0
08f481a284b5fc6e56036576e381e53d	20	15	19	0	0	0
08f621a6abe170604d64cc4184403bbf	78	900	137	0	0	0
08fb905b5b7bcd9a71b341369b9d6b87	0	0	0	0	576	0
08fbd2e5fe3f200f8380447343c2bb05	0	0	0	0	0	40
0902baa8569a3d96a735728a7943750e	2	9	0	0	0	0
0907718d21b96edcaeefe80fb39e2c4d	0	0	0	67	0	0
090aeffcb4acb60d07463313d8b29e47	14	25	15	0	0	0
091818ac103c877d7837e7523d1a3af8	4	0	0	0	0	0
0933ad48cbfe7928e97cd7cbf42d28e7	0	2	0	0	0	0
093a5479de048c7441525d355d2c027f	0	0	15	0	0	0
093e9e810028b5b9c2f6c3e9be6d77c9	24	0	16	0	0	0
09473ae5fba418bff29966ca8962fc18	0	36	27	0	0	0
0950133424b822a381b5a50518c4c37d	32	0	27	0	0	0
09567042b621f54e382ae6a4ea3369bd	0	7	0	0	0	0
0962b75ed8d3c13fcf66a3c86a0128c9	0	34	0	0	0	0
09767d35cbc93c55aa27ca90826d71ed	7	0	0	0	0	0
099818be9354110013d56fca7c0a33d0	0	19	0	0	0	0
099993b4ae2e40c438c9cc5cc32a9bf1	0	0	6	0	0	0
09adbac81a7a6e0176cdb41651329ba0	0	18	0	0	0	0
09ae57b1f4940ba80f7b59028d098bfe	15	22	0	0	0	0
09b517a58652edf060f220b84aa1c353	27	10	25	0	0	0
09b52dbbc3933f9a04559df632d9fc16	0	17	0	0	0	0
09cfb1ca43f07dc6201545d6db0a508f	0	0	0	0	0	97
09d2f2058907b05373e531d84f2a51cb	0	18	0	0	0	0
09d765b0404a66e0967579d196028626	10	0	0	0	0	0
09e66d1672d47ac22dd953d80947ab89	0	0	0	0	0	37
09ebd2939f75c58dd7fa8cdd16ebcf4e	31	40	13	0	0	0
09ff31bc53d70e8de6c857a1b3763e9a	0	15	0	0	0	0
0a1db36ce6456f4ddf71221b4ce69372	0	26	0	0	0	0
0a3ee9d2126163fba9d4900f8adf51ac	0	0	0	0	16	0
0a53ca905e1eddf59f7cd4c66b112a2b	5	0	0	0	0	0
0a7a7c35a3b00a147cfa6a7c884fed2a	0	6	0	0	0	0
0a821674ee69a59d57910f9d3cd569a4	0	0	0	0	148	0
0a8cef4c620905f31454b9cafcb0f426	11	17	17	0	0	0
0a9149d7073785e876c7c6b661c47fa5	77	35	117	0	0	0
0a9f0cf91f2cc63d92cc7d3504c4ee82	439	432	437	0	0	0
0aa5366cd097be71c65936a2c4f2fb1a	0	0	0	0	4	0
0aa671b4b077fa91f270b8707f6a3996	0	7	0	0	0	0
0ab0c834c861571a86c3f51f922133f4	0	51	0	0	0	0
0aba944140ecd8624a80b9d1d744155d	0	0	0	0	359	0
0abc6f21816a014c640ab5ec55667d8b	0	0	20	0	0	0
0acdcb0730e7df6714ab80c068075640	225	252	223	0	0	0
0aea5d9af0e3dc097738e4837e4d9c2d	0	4	0	0	0	0
0af6047349a348c37201cd9f11dc97c4	0	0	8	0	0	0
0af9aad371a37f1267e86f075cfa4359	18	0	0	0	0	0
0b0518914177cf010e1ef9c54a6db3b1	0	43	0	0	0	0
0b12835fa498ceaf800913bca8764435	0	6	9	0	0	0
0b1c3d4ee4475f2532926154a601561d	0	10	15	0	0	0
0b393c8bd15a5801b3612bcf60e0c381	0	0	23	0	0	0
0b3aebcd494d9cbc6f11f8c0e5096c92	0	0	5	0	0	0
0b44afccca758bfc2174014d0cd250b7	0	15	16	0	0	0
0b4c252bcf3f3bc828966c21ce79fd8d	17	0	0	0	0	0
0b4fb9305ed708ca2904ab94a677adc9	29	16	27	0	0	0
0b58b64b7eb2be64f0eef814fc71a5df	28	24	60	0	0	0
0b5d1926e0f52795eb2f20cfbd75bdaf	0	4	0	0	0	0
0b63e5d7ac46e65f5811a6df19537cba	0	0	14	0	0	0
0b681f6cab9b149c41181c2a2d6a69ff	69	0	98	0	0	0
0b76cd17b5ad34981000a2b373f52641	0	3	6	0	0	0
0b8eda02f53ba6a998c1f01a7c568063	0	0	11	0	0	0
0b928ce22dc1245f2534f76b6fd6b7ce	127	102	166	0	0	0
0b98c34340a421080ef0f9d50de6447b	2	0	0	0	0	0
0ba0f2c2cb8e2131b181d2aa97f572e8	0	16	11	0	0	0
0bb67342485a8e1b3495af88e4cc2279	0	0	17	0	0	0
0bbb088d33b80b1f54aac9f9c10637d5	0	0	0	0	0	245
0bc72e079ea81bff9addb751d27a38e6	17	0	13	0	0	0
0bcf0d5efc40e4a88e15df34cb0c1c80	29	0	15	0	0	0
0bd0dd1f9bd5e9803ddd954a3f20f9b8	33	129	85	0	0	0
0bd3b3d786afa065dc110efc7a47f8e7	0	0	0	0	0	9
0bd4532680417b0840097cf7f75c431b	0	0	5	0	0	0
0bdd1466dc9ddb232cc593c6c7ecde5e	90	0	0	0	0	0
0be4a3061e0796837e8a3b4b9afb8dca	0	14	15	0	0	0
0be4ad3a24a17f9e71e074128b30f54f	13	0	0	0	0	0
0be5a4f2884a421136dacd31604ed9ab	0	0	0	0	0	71
0be70a729bed518ca48d685900014788	0	0	0	246	0	0
0bedff860bc4a96416094487cb7935ed	19	0	10	0	0	0
0bfde985984c4ab4981480bf988d0f8b	0	0	0	0	7	0
0c04c0e3abed6ad6f2a650c964d54a98	0	0	0	76	0	0
0c097c99f7c049b0bf1e2023547e5719	0	0	0	116	0	0
0c0dae96b76a2a1bcef4db4bdcab17e2	80	37	71	0	0	0
0c1ded31f2784051f757dc42e2493693	0	7	0	0	0	0
0c3c042075be7d04f18cc2694a4b7ecc	26	21	10	0	0	0
0c443b081fb69d6f88d60364eac4d5d3	0	23	0	0	0	0
0c467e565696354aace9b3bac4e2dacc	0	26	19	0	0	0
0c486f0318e444e100a018085af4cc59	0	0	0	0	771	0
0c60c665a19578af51dd71cdf30413b7	0	0	0	0	0	33
0c6acd3a981de5f4f077289a34c85810	0	0	8	0	0	0
0c6cdb120064fa5d575dc41bbb4ae454	0	0	6	0	0	0
0c71409d255dc921aa12246aeb4db155	0	0	6	0	0	0
0c714894e9a520a2cd157e824c031066	40	56	43	0	0	0
0c7aef07a6c37735249cdd2ebf25f9d9	0	18	0	0	0	0
0c7ed07661f847c51ac26f299e555c8a	0	8	0	0	0	0
0c89a9dbc35cff34a2c74115731e597f	0	12	0	0	0	0
0c8a2e2ec5a37f3f3364b6326b53da96	0	43	0	0	0	0
0c8b08f22e43a87d672eba7fcfaa236c	0	0	13	0	0	0
0c8da4ee22e3060d16b2d183efaafe18	20	0	59	0	0	0
0c9051319719891b88c1a33288812ded	0	13	19	0	0	0
0c941df9a9def1ec4e08a19d79ca1dec	0	11	6	0	0	0
0c96bffea065316834cd7248fd17701a	42	46	42	0	0	0
0ca22c33e6518d426cbb29b2499ede8f	0	2	0	0	0	0
0ca74f4faebab0b01d69a79a1358a9d3	29	0	58	0	0	0
0cbf8d2836942381f7c699fa009db8b9	0	4	0	0	0	0
0cc80ea80d831d9883ea3a8464df7d3d	35	0	0	0	0	0
0ccb9c20fbb8ae8b0201b679e21ab86a	0	0	9	0	0	0
0cda006c1405e1be53fc8a238c61bc89	46	53	44	0	0	0
0cda6936d5ed090d731106f70c10658e	0	0	8	0	0	0
0ce73da1935674a88b2fbb6e1ef413cd	19	0	0	0	0	0
0cf86bbc5ae62215b1386e1c33d7cf8f	0	0	41	0	0	0
0d07bdf1c61b47346cd6d636d96249f6	0	0	16	0	0	0
0d24c60f7c814ecf8146f7d5687ddeba	0	0	0	0	0	82
0d2529959760b652cee4d9416e8cdda2	127	112	127	0	0	0
0d2ad7bd0929ba58ae7e595417c2d45b	0	0	0	0	51	0
0d45b62359f185730a46b97595e46aeb	0	8	0	0	0	0
0d4672b18cb786d92b1851e2764e406a	0	5	0	0	0	0
0d5d43d36da54b29c3f4179657fc4f84	0	0	0	0	467	0
0d619cb2b451dc8fedb9d269635aa718	0	0	0	337	0	0
0d6646a57ab843f2309563dfbcb4b84d	0	0	19	0	0	0
0d66ade42103ea009a32cd8832c65789	0	0	49	0	0	0
0d6987712e858db018064828d2186f7a	0	15	0	0	0	0
0d71c12227f08234d9185ff62fbae7cd	4	96	3	0	0	0
0d8bed6ed96a7b3d0c8bebe842be8c29	0	0	19	0	0	0
0d9af3dbeda66b4af6da5ee695631bbe	0	13	16	0	0	0
0da82cf03a37c2f7b99bdbc57beaa484	0	0	0	0	44	0
0dae5ab7e9a5919428334cabf9886d5c	0	0	25	0	0	0
0db10a3321f7cf96fe2ebb7a32a93d4a	0	0	1	0	0	0
0dba9be95dd0e9696860ea95790bc407	12	6	0	0	0	0
0dc3853e12b623fa0c6ec04e315a6b8a	0	25	0	0	0	0
0de07f4f862b3931614c1d3023d4a474	0	33	18	0	0	0
0de420b4ad9d4d40c9e6cc18fcfb0218	0	0	8	0	0	0
0df013ba4b1c13749a89b1464649d417	33	18	33	0	0	0
0dfd0573964655e97c06690fedabcbd4	0	0	8	0	0	0
0e0af06cb591a5bac877513a6ad76569	0	0	0	842	224	436
0e1b529f9f2760e624ffba9c338698ad	0	13	0	0	0	0
0e2087cbf9ecb4fabb566e69920f82ec	8	0	0	0	0	0
0e27c7299ea1505afa28bd508f16b326	0	12	0	0	0	0
0e3f5b6c0356c2193c88228b84b60352	7	0	0	0	0	0
0e4af85e51bc554fe915607383cd9f1c	116	107	255	0	0	0
0e4f0c5df0bee81a3be1d9096fea3c53	0	0	10	0	0	0
0e52931edff44fa6a0df5b70e6fb606b	0	0	0	0	2	0
0e5719e0f8137ba96df4a60b7ccc4702	15	0	16	0	0	0
0e6105f0022e72efcbe4ccd2f8efff13	0	0	5	0	0	0
0e6823a064e23a24bd896ba58589a03b	0	0	12	0	0	0
0e8585f25562fe8b082c3b3f406838d1	0	0	0	0	64	0
0e8b6780796c0264de4c0123ad9515b6	0	6	0	0	0	0
0e928dfcf41c729ab6c912a4848ef1f2	0	5	0	0	0	0
0ea13f6c4436fe905bab562a5c557781	0	0	0	12	0	0
0ed1f3e6cea3a1bc7e0182889031c0b1	34	35	33	0	0	0
0ed45019c064749d346e3d3c09ccc4c9	0	11	0	0	0	0
0ed668b815bc8b70f29404bbc82a5ab4	0	5	0	0	0	0
0ee35070c09b6a5c0a4a6b89c19c5194	0	0	0	84	0	0
0ef1cbf664b9c4d4b5dc1173a2bd39c5	0	0	0	119	0	0
0ef300836983be5c2334ef6c372b12c6	31	21	43	0	0	0
0efe92a045af71041685868799a15451	0	16	13	0	0	0
0f08b163b03ac27ed564a8c7a49ca067	0	0	0	0	309	0
0f104b5eb81a8f772e03efdfa1ae1a44	0	0	0	0	24	0
0f118dbf7825db679c188fac49594ad4	0	0	0	0	69	0
0f1ce215eaaa1ba32e23caf5ba1f638b	24	12	12	0	0	0
0f1d926e6184e8fc98c946823247597a	22	0	0	0	0	0
0f2596654e0adea9d5a5a6c699f1c491	0	0	5	0	0	0
0f4a1b31aacd9f7072998692f91a25f7	0	0	0	0	23	0
0f5452665ea975e8ad0557f933addf2c	0	0	13	0	0	0
0f5ca7b850c8eab6f16ae041925b8b7a	0	0	0	0	3	0
0f644df67de292252b3aae64ee415243	0	66	0	0	0	0
0f6f8cc61a38caa8f8f6b0096b5a866c	0	9	0	0	0	0
0f6fa7a4690f9b46276cb9fe7384f165	43	0	29	0	0	0
0f7a3e533e4a54551996e784e2c61bb6	0	2	0	0	0	0
0f8549a7ff24cb169a1007acc36ee726	0	0	62	0	0	0
0f866d4e2ed88d4261b0b95fc4ebedc8	0	0	51	0	0	0
0f90a0d2ff8ed010d003ec560bb0f0b3	0	6	0	0	0	0
0f95dfb94408d1fca3ada02b64b9abc8	0	16	0	0	0	0
0f9c513ded18a90c0b6b78bde8584f85	0	0	16	0	0	0
0fb4c58b4ba90c61bc3bc52ced36e9f3	0	0	0	0	0	3
0fcb40f2753f604607d2a7bdc68c3ee5	183	98	125	0	0	0
0fcb560d1cd875f50a9499e7eb6cbb01	5	0	0	0	0	0
0fd716889c3f20c64f699a030970903d	13	0	16	0	0	0
0fdaf5a6e2cab0e1831f894a9fa6d92c	6	0	3	0	0	0
0fdb535eaa330f328b5c83459f32df12	5	0	0	0	0	0
0fe1e8a5f1a1316dff50ab522cff8bfb	12	15	16	0	0	0
0fe4f858e75c94a0f64f5e56e4279105	58	44	35	0	0	0
0fff39dcb0efdf2980f65fd1eadc48a2	33	0	29	0	0	0
10004fabad288c0cc207e487bc6ed447	10	0	9	0	0	0
1003714adebe9e24435256769ea52fb3	0	7	0	0	0	0
1016babd031f6203a10a850bba33a330	0	43	0	0	0	0
101938ef27debbf2fb1ed0ebfcaa9cee	0	0	15	0	0	0
10220a8c9be460c1737757bac5e51a04	0	0	14	0	0	0
1028be1fc5c8daebafd549b787fed45a	9	0	0	0	0	0
1029a194910b75102b42f11500d650ae	9	0	13	0	0	0
102adec1a05d8f2be15e62ed6902edb7	0	15	12	0	0	0
1032c933e61506a5c4d2a7806b5f258b	0	0	0	186	0	0
103503ec038bb3cb286e7b20c6fbaeef	0	0	0	0	490	0
103fe55f4058cf0739a0c85c9e4b16f8	0	0	0	0	0	29
10498e61d2d7f85a69a5c7b69b8f0eb9	0	0	0	13	0	0
10507637c2381cc27563a505f979ce83	4	0	13	0	0	0
1051765d8eea8a6a15dc9ce8ee2e4ab9	0	0	0	0	6	0
1067bcb0c05c7a7776117d64e9e91060	15	0	0	0	0	0
1071c7eee7f3abcfba0369cf77f947c4	0	39	0	0	0	0
1078da9a89eb983ccf78b518a89e2b12	8	0	0	0	0	0
107f7c5b714bde12ba1c69ebb9890901	0	0	0	0	0	295
108cb6048a195a22e7ea3eb16e445805	0	0	5	0	0	0
1097dddfb6e2f091fa99502e296dee11	20	0	0	0	0	0
109840579db6d2834302ca70c5d11455	0	0	27	0	0	0
109c0822fb4620bcac52b1b81c30be6b	0	5	0	0	0	0
10a3ce3658e1fa290f9dcdca62071444	58	0	0	0	0	0
10a751963dcbd2d299708ff2380471cf	0	28	0	0	0	0
10afc64960a7074456e521deb6164c4f	0	15	0	0	0	0
10b0dc4723da5107b2b3fd20bc80434a	22	0	0	0	0	0
10b6a949a1500e8e9c3ef957824e03d9	0	0	22	0	0	0
10c738ca7ce93964825d7ab675d5c05d	0	4	0	0	0	0
10d2a61d5b3f7e5db7132c24b6169d2c	0	0	7	0	0	0
10db83c309beda9f2b457466de62ab94	0	0	10	0	0	0
10e10d519b4b769f1f80dd0399c80792	0	0	0	0	0	5
10e2b2ede574122e73a278cceecaffc9	0	12	0	0	0	0
10f1ec344ea289b31ea73a243c0e3e36	0	0	0	0	5	0
10f499705598525caca3e2c02b136413	6	0	0	0	0	0
110a45e2086c475cc1d98fae29d5c3a5	0	0	16	0	0	0
111a319ecd1cfbcd4caa349da7419c74	7	0	0	0	0	0
112414d0525479f3a766c6c07e8f662a	0	0	0	0	0	11
11265a3adf66be6cd598f854d4e623c7	0	10	0	0	0	0
1126caa0af011cb4b96627930c38c562	11	6	0	0	0	0
11318e2132ab80da51d99a7d598431b8	0	0	0	0	41	0
1134ba9e676cb010b059dd4fef5babe0	13	0	0	0	0	0
1136443e4ee888a3d6388c42332a7a6d	0	0	0	88	0	0
114b88118e176b574a502353c99eef49	0	0	0	27	0	0
11549dd97b23b4c2a700435899409a72	0	0	0	0	0	28
1159c4c915f5f98c2ea736c8f7cfb9b2	20	13	10	0	0	0
115ab85283e663c9726895c9537e98b1	0	0	4	0	0	0
116d94769036515c0d3db9e657d2d392	5	0	0	0	0	0
118a4bc1b7d844663c4048247e9ad189	7	0	0	0	0	0
11979d4b5edb764d20c3d88078c80455	12	17	12	0	0	0
11987377e865f060cde00917f83f9331	0	8	0	0	0	0
11a6b4a63bcbca86ab4a96cad396c5c1	0	0	0	0	39	0
11ab58f923d34d5cd7bf10fcc67f6db8	0	0	0	0	37	0
11af9c6335deb1ace2a499cb7c75f420	0	17	0	0	0	0
11b7822b019d982581959b6921710f9f	0	0	0	18	0	0
11d0e59d1718ab8d3020827d05271572	0	79	0	0	0	0
11d1ab71cef66fa5aab8dfbead8f24d9	17	19	0	0	0	0
11d62494d11b3d622c67768712137048	0	36	83	0	0	0
11dbab2aca6139430ef8e89833652eca	0	8	0	0	0	0
11e40bb1acc7ff0d09f60856a7563ef7	75	44	78	0	0	0
1207835e35ff4ac3aaa9d50622ce84d8	55	60	64	0	0	0
121595651c33159fca986a5f9d35066f	0	0	0	0	0	8
121b275a515b4556f916aa411227a218	0	8	0	0	0	0
12208ebd41f9022c9235e68b640bf526	0	0	0	0	32	0
122857638477afa563c26479c30186b5	0	0	0	0	567	0
12296b4b6e4a771be90105c7d9fdedb0	0	0	13	0	0	0
12373fa04043c93bce7879f4cdb4f10e	0	2	0	0	0	0
123b5f7002104a1bcd45572112d37dd5	6	0	0	0	0	0
124f2d25bebcd440aff01b3da9581727	6	0	3	0	0	0
1251d8b36d8d28d0f23e9f4e23459db4	15	13	0	0	0	0
125358a86cc2e5136055d5376d193488	139	188	141	0	0	0
1256e1a22aa04ad72cbcfaee64703cc8	0	18	6	0	0	0
125844fd7482de35f0df178faa2f8f8f	0	3	0	0	0	0
125882b1932f3a37a48f5dc972a861f2	15	0	0	0	0	0
125aec830009c2989c4e47dd89159049	0	0	0	0	0	3
125f221b92384ab0f78de2bb069f071b	7	9	0	0	0	0
12635c3d12c746043c313d51d88e02b3	0	0	0	0	0	171
126cde3feac7ab0e51488c8d4d01d3f4	9	0	0	0	0	0
1273e2e61b7d2eb2ecdc5f11e7a291b3	7	0	8	0	0	0
127857df180870d0a9440344028ec8eb	416	354	359	0	0	0
127b6c56350d4c997e5be67dd7cd5e6d	37	25	37	0	0	0
127d8b1f67b3bc24b2a19ded82204ff0	0	15	0	0	0	0
1286ac86f2ea087f1cd88adcf361ef33	5	0	0	0	0	0
128d098a0f85253d7c68558aa2e2edaa	0	30	12	0	0	0
12901c0273b1ab5b2fbe333e0980d52a	0	11	0	0	0	0
1295530967845411c1e356ca67f94911	0	6	9	0	0	0
12966bdff2d5c1534a99f171dc3cb32a	42	25	43	0	0	0
1299b2f2887f641a21c8b267e25216a1	15	35	0	0	0	0
129ed417ab7565f7ab48d0e4782a10af	0	0	0	3	0	0
12a9b3a64edffcc320d6ad58bd7bc889	0	0	7	0	0	0
12acf15f460ef0aea22f773c136c3287	85	79	58	0	0	0
12ad2cc9d3e4f012a942d65babdda7dc	43	127	13	0	0	0
12af102c55fba5854791fdbe8f84e4a2	8	0	0	0	0	0
12bedf964c6eff4653d2562acaf6334a	74	56	86	0	0	0
12cad898012cfe0bb457c35741527982	19	32	27	0	0	0
12cada3288e21c51dc991632c319f2d7	0	46	29	0	0	0
12d20b50287b333d90d2b29d6a3a50c3	50	9	25	0	0	0
12d46865e8fa796bf2331ad53ad23368	0	0	8	0	0	0
12d4bcc2361376af429ff87d89909e5f	0	13	0	0	0	0
12d74cf4397618486147c2db83d5823d	23	37	216	0	0	0
12de4e53ea22566a392e9c641ef6234d	0	0	0	0	42	0
12e96d0058e3e91544add4e4b3db5041	3	0	0	0	0	0
12efe65e2ae347ad470f7e154ac9283b	0	0	18	0	0	0
12f6be9d80def2c9d81f6d2ad5d7cfad	73	58	47	0	0	0
12fb0795a5d06dd8ebba953c4db41d36	0	9	0	0	0	0
12fe1d0d25e07b8802e7e13b276d38c8	0	0	6	0	0	0
13031ba917eaa4026f37748b07912de7	8	9	0	0	0	0
13043fb9b9f600945d626ea0cadf2d91	0	5	0	0	0	0
1308c46b50415bc646b28a82eb9f394b	13	0	20	0	0	0
130b4061fa7180a06308f25d5bfa7f57	0	0	10	0	0	0
1327aef7cd95cdc522b622bf12de8e20	0	3	0	0	0	0
13437bd43fa9182aa7617fcb4b1650d4	0	37	0	0	0	0
13438b4e362eee43d362d0dcdd703362	0	0	0	0	0	47
1344b8204bf9a57acaf27b7500195549	0	0	8	0	0	0
134c8399ae0502160e4bb6d981781668	0	0	8	0	0	0
13506328627c5fae3351a9e7720d4549	0	0	0	0	0	64
13525d527afe49b8a5d8937a08b4306a	0	0	33	0	0	0
135bc4033b400e38569897c80f3b2b9e	0	6	0	0	0	0
1361d9da8187d844fa34c3314f8d9266	0	12	0	0	0	0
1368afc59baacf4c9ae16490f9e69aad	0	28	23	0	0	0
136b6f7551c7d70ac4ab0cfd6a732536	172	85	179	0	0	0
136c07fe0118c2c61ddcdd095c7a732d	0	4	0	0	0	0
1378fd85408678040edcd33f865ae27a	0	0	0	0	0	2
137d378236b2da5751d363d756a51a91	0	0	4	0	0	0
137e93f21466d4890d7c0c050f7d8e17	0	0	0	0	201	0
137f77c31fd9b4caf65a5e1a7b4bd410	35	0	23	0	0	0
138480b4649ec6ea529f6be570c7ef3e	12	0	23	0	0	0
1388c0aebdac135108cf3b25252e2d54	0	0	35	0	0	0
13917c7b1312064f8e024ac3d3dc12d8	0	0	0	106	0	0
139f82fdf4ccecd6e4947198d8cf040e	0	6	6	0	0	0
13b384129b3a7253509d79461030f442	0	0	0	0	20	0
13b384a99373aee1c45db2ab6cadf4ee	72	8	21	0	0	0
13b73eaaee131684318ca5c936ede3a3	0	0	0	21	0	0
13b98e32e530c38cdf399c87fce08ea7	0	0	0	2	0	0
13c58846bd1d4023987447136303f2f0	43	37	30	0	0	0
13d5035f314899db492ac080911b351c	7	0	0	0	0	0
13e52764e1c08c4fd9902769bf9e022e	17	178	104	0	0	0
140d0a153f5fdd7a8f689ee761f7fec3	0	10	7	0	0	0
14117dc73575677f297ebad539d2d193	0	3	0	0	0	0
14284daec7f6fed2947fa4810e0f3829	0	0	0	0	2	0
142f086788ed7b35071ae39795eb44bc	0	0	0	0	0	37
14531f3d8c121a23cf3c4270be08b1eb	0	7	0	0	0	0
1454a3922cf26a2ee11da5245c9058cb	0	19	0	0	0	0
1455065da61c97636ca24bccaaed58e6	0	2	0	0	0	0
14567bb4a13a35c881b597f25dad9792	0	0	0	2	0	0
1456a1b3dab3e554106836dee3d26866	0	0	0	13	0	0
145ccabf074c00ffda96e3b9e328e14d	15	0	0	0	0	0
146230f2ba74f6b1cff6fde709c723dd	0	0	0	0	0	9
146830fcb9de2b0bc1b30b0dcacaba3c	0	0	9	0	0	0
1470bf082c874a31b12759e3aec918dd	0	8	0	0	0	0
14712df0867fd262a398c4178b1acbe6	0	4	0	0	0	0
147173e57a0a0df0d37142524e2f859c	189	0	0	0	0	0
147576b0b68b5df1fe479e469ca4d23a	0	3	3	0	0	0
1477f8685f86529e4d8f34908fb2e4d8	0	0	10	0	0	0
1487ab1b8ece8ffd80871cbe2fe78678	0	6	0	0	0	0
148984839715c2cbe2abd5bf76c7ac09	9	0	0	0	0	0
149333c6d2f4279dc8d41b1cbca0d80b	0	18	0	0	0	0
149f656fa4a83ff7dc71e3c49645ce4b	20	0	0	0	0	0
14a597495c9c251d0a3bd884e90977db	0	3	0	0	0	0
14bb8913f561916b3b7f1e25034a906f	0	41	0	0	0	0
14c7421ccb8cb1199fe15c7ec91f3a97	5	6	28	0	0	0
14c758c73520192523f8cda7c406e541	0	0	0	0	2	0
14cc54abfee80d89e468fc84a8c372f0	0	0	0	40	0	0
14cd43811f62f72300988ec7b5652b6d	8	0	13	0	0	0
14de17ed86887e648ba6cb389addc89a	0	5	0	0	0	0
14eb5c66a70d47d693353f8ffd19d899	0	5	0	0	0	0
14f2742f10b4646da040c9c0b25542f1	3	0	0	0	0	0
151235b443c948c562207466c801e703	0	16	0	0	0	0
15166e2bc77bbab157579887590a4333	6	0	0	0	0	0
15277060932132b50abf76610bba49b0	0	0	8	0	0	0
152de9afbce84be32543377c8b90e184	0	0	34	0	0	0
1533cad69619429d948fe09ebb1a440a	23	42	18	0	0	0
1534ada09b6a921c03c96e34f71ac50f	0	0	5	0	0	0
155300a4f09e9fd410197157a1f17642	0	0	0	0	3	0
1557b502888cb39af533f95713b1ce9b	0	0	0	0	1316	0
155946627cf9c1775ff8c221dfa0e31c	8	0	0	0	0	0
156156e1352fec02fc30ee062d5897a5	14	0	0	0	0	0
1568b1be80f0ad3b5c9ad53079322816	63	57	68	0	0	0
1581e8b55f8eb90cec3afeafa0d501cc	0	27	0	0	0	0
159f4bd43719f4226ae35e9f3a257ba5	0	7	0	0	0	0
15a4a5b84c046b2181b8a0f52613880b	4	0	0	0	0	0
15acd07dba94affe9fa3a32fe543c3a8	0	5	0	0	0	0
15b23a0820aa5a81b6bba053a90d2ee0	0	0	12	0	0	0
15bafa1a85b8be8ec392b51a9cc1a274	0	0	0	0	0	75
15c26b0e81866f0ca71354b928c4b4ac	0	0	0	0	0	1008
15c9e497bc236d5c40ad7ccf7624ebd3	27	53	0	0	0	0
15e6169dd5d1146cb7e14cb59e34ea9a	0	0	0	3	0	0
16087009473d02eaa6eb305108fa7bab	0	0	0	0	0	65
161f984c32fb3501a352ac54533132d7	98	83	77	0	0	0
162c161c1b0661707690cd0c6eeb6775	0	0	41	0	0	0
162f605e75c0d0f69b069542fc878e05	0	0	21	0	0	0
1630d48ef74376f9a0fe56e0f84bd631	24	0	26	0	0	0
16391a94f4564cc722553b7b40b00381	14	0	18	0	0	0
16509cfe7d2a4f324be9c303586e01a4	30	0	0	0	0	0
1651800556d727ff8368e1795e16c102	0	0	0	0	0	164
1651ccda9e160e2395a82b537d4c8b3b	0	0	52	0	0	0
16547de03659d6baf88e8347bcb7449b	0	0	0	0	493	0
16608e0699e214936945aa4bc042ff5b	20	12	0	0	0	0
16676d4ab16e893027cd01cc3ee00921	0	5	4	0	0	0
1668ecc90089fd05870b9fcc9ff8669f	0	0	26	0	0	0
167ae5d7e3d29cf816d2c26655dc498b	0	0	0	0	5	0
167cb87bc2d9ceb0a80e87666bd16926	117	122	143	0	0	0
167e089b628819d095a131b927d88f8b	17	0	0	0	0	0
1684171607cee7985a28e4e065151c2a	0	0	12	0	0	0
1691946bbb1c6ed1afd48995ae0dc6cc	0	0	15	0	0	0
16ac7335f4ff8defc6d7f72d5861abbb	0	0	21	0	0	0
16b34e3626ab7fd6ee032f60937dd6de	0	12	0	0	0	0
16bc2fb0d28a1edd0c68f166bb9a8f97	17	11	0	0	0	0
16c387df96fbbe9c61f4fbc24b390fab	10	9	8	0	0	0
16dae2ad23c148aac8dbdea390e8dd87	4	0	0	0	0	0
16f731e3f8b8d02a2aa68692f732bc5a	0	0	0	2	0	0
16fd0fe19a5a496670ad8204ace4b749	0	7	0	0	0	0
1707e31bc20adbe6239fc0a7a3cb1fa7	0	15	0	0	0	0
170a4bec94b609306c1e67a686a8c7d9	0	7	9	0	0	0
171708a56ae1dd7f548090ea94374de0	69	73	79	0	0	0
171e161aa3863060eb6d5f3691ba0da0	0	0	6	0	0	0
1725c98983c1f79ba25109b3195d7469	10	0	0	0	0	0
1729a9dbb17df9324b1081187fb49ca8	0	0	0	0	38	0
172de866b9ac4389385a28275306095d	0	0	0	0	6	0
17396a4708cb7476d959484edd39a251	0	0	10	0	0	0
174160ee5fe365a7743668b974e22aa4	40	33	34	0	0	0
17438dfbd6f67ba4891edaec17656ac1	0	47	0	0	0	0
17579b6256ed65c5f4db782326840fb8	9	14	0	0	0	0
1760c112f16d896b9795ef7a7685e6c3	0	7	0	0	0	0
17616dc05c38148d9543170da8cdb88d	0	0	5	0	0	0
176d8344414d104b5289bee53308ea7a	5	9	0	0	0	0
17723bf553471de1966fdf9e90515467	0	14	0	0	0	0
177560c7bd8864b5afa47378853c0bde	0	19	0	0	0	0
177c6b88afc1b9602db1a7106702776e	0	0	0	2	0	0
177d040522c6f0857991407cca8d8fd8	0	19	0	0	0	0
177fa80cb9db0e4cb164479509d3f915	0	0	17	0	0	0
1782095855fd6904e709374c0706c848	0	4	0	0	0	0
1788cd8d68461c1d76b74546998dc5e1	283	183	276	0	0	0
178d1b22c5565ca3f856435bd94d60eb	0	0	0	0	0	218
17928eecb86a5039b2ee098e93d69bcf	0	0	3	0	0	0
179a3dc438ccb0701849161d98145dfb	0	0	0	44	0	0
17a1798b0965960aac7e55299cabf769	0	0	8	0	0	0
17a46a8571b8fc09cef6b201a4041407	16	0	0	0	0	0
17b05e59f23648c9b39c13b3a54bfbd2	0	0	5	0	0	0
17b4ca861d366b02c1d09530757ab825	0	0	0	0	22	0
17c1f6f9839dd6354e437a09d2e74f28	0	0	0	0	87	0
17c3aa1f72b3fdb20569c19cdc6223c7	0	10	0	0	0	0
17cb6239c940ed33f727e6c2bd275eda	0	0	0	0	0	1069
17d8070ff851936ce13f4c978de21fb0	0	0	0	2	0	0
17db35a904e689ae5b4ac176c0323e82	0	0	13	0	0	0
17dd9d96e1d4c75f2a190fe6f0c2aceb	5	0	5	0	0	0
17e08b656eba409e782843b0fcdef5bc	0	0	14	0	0	0
17f016e3298748a0eb03b67eb9267a19	44	475	182	0	0	0
17f0bacecb9c38a602884a4952257b42	0	12	0	0	0	0
17f9bfb2c094763841357a27c5e7c0ae	0	0	0	0	486	0
17fc2816115b6330252fc69d1d59be3c	0	0	0	0	0	229
18074bda6d50128c88b4f9eca60e5af3	0	0	0	9	0	0
180bce54e1b83f476f3ebcd22bc3512b	33	14	13	0	0	0
180f7080a26467f4287ef202237a077c	0	20	0	0	0	0
18168b9e90d6cfddb5067ee4180efc2e	0	0	0	63	0	0
183ebf10f7d32a443c7d4bc9ec1671b2	0	0	0	0	0	3
18412d1f7255f97c2f9b2b00efac12a6	0	6	0	0	0	0
184185548348a15ee788c2a705ec2512	485	423	374	0	0	0
184c7ff6c393cbd39cd1ff6d5a220b07	0	0	0	0	153	0
184d6a6a10a54de33d24a728cc2e3315	7	0	15	0	0	0
185afa5df1a8324767f8bfdebe75a177	0	0	0	3	0	0
185e3e354041a88aba6b3552b6364923	61	38	64	0	0	0
187ad41a451538a59fd8b768c5b4b021	0	0	0	4	0	0
1886c7940a7140edfbe6da8130ce2047	0	0	46	0	0	0
189a7c7618f6442b77c4021990b8fae2	44	0	44	0	0	0
18a0140ad0def0f1b7d04b9b1995449c	25	0	0	0	0	0
18a15dc6159eb7676af50d9f7bdb3ef7	18	20	19	0	0	0
18a5d32337e4b34cbbd700b1fc224e15	0	0	7	0	0	0
18aea86ba99fb82bf8ce0502ba0ff081	0	0	2	0	0	0
18b386c988acb9ad6b38bf8510b52f8e	0	7	0	0	0	0
18cb902d7a6831cbc2da75552a0665f9	0	0	0	0	4	0
18cef11b16767d84721a196cb21bddaa	0	0	11	0	0	0
18ecabefcc5ec6708cc71c1662382699	0	0	0	0	30	0
18efe7930759e1e7828615efaf4616ac	10	17	0	0	0	0
18f45e0b5ed6705cfab3d0f32ccaddc5	0	0	0	0	0	135
18f807a6f5669ec1cca71b8a9811b583	0	7	0	0	0	0
18fe6eba4c679454b225929bd079e3ef	0	0	3	0	0	0
1901b6b1feaf9071e2b681dd4d0ba95d	0	0	0	0	829	0
190230fb092bb35ce6bfecd8b5de8d0c	0	0	10	0	0	0
1902c3bc5537b5467170f38eed55b372	0	0	2	0	0	0
191113fd9e0869f5d867889205279d7d	0	2	0	0	0	0
191a037c40a3012a1c1aee4e0fc61af2	5	0	3	0	0	0
19388416c9343f8957e46040bf2ded3e	0	10	0	0	0	0
193b2408807623ff4048dfe24a9779e4	20	10	35	0	0	0
194044f2323106e1ad9ad30b01a7732d	0	0	0	0	0	70
19418acdbefbd10b0cadee2000d5171b	0	0	0	0	0	404
19434adcca9cae7c25cf9818c468d227	0	11	0	0	0	0
1948522c3f7bd3da7b46c0582307a64f	43	38	53	0	0	0
194950dd000f2e790b0dac94c7f98a1c	0	0	15	0	0	0
195cd404e9ff661781f242a4612ebcec	0	0	0	0	0	8
19680d9bf1906e36f4a399a82e6ed969	0	1	0	0	0	0
1970dcd1b2df36eea57e09f4d0872101	0	0	4	0	0	0
19731f66497d28506972a593aadf044d	0	0	0	0	993	0
198aed00ede9fd99a69d309b683c7a11	25	23	0	0	0	0
199a9162f488b7e7b1bcb3724095bbbe	0	3	8	0	0	0
19b04f2babf6af613eed71cdf6527fdc	0	0	11	0	0	0
19c45bd78c720b82c5bb4b31f2f20d65	9	32	0	0	0	0
19cbeb698e6dde83c7c5ffad976b8ea8	0	2	0	0	0	0
19d5dd0065167618d7dd2a61096cacf6	94	97	155	0	0	0
19d8690b1c7164947d1f78a41088f901	0	4	0	0	0	0
19db70222e95a97e69b21a7cf284a699	99	49	43	0	0	0
19f26563909d3bfd33f5022c6b11a9bf	0	4	0	0	0	0
19f4a4e095c02695647b4024ddb91b5a	54	35	56	0	0	0
1a1d39050db6e2ffd3653e8eb8e36649	0	0	0	0	0	3
1a2163c3709197e8a2dfce3b6a7b81b1	0	0	0	0	159	0
1a2a14d53d76027fe02c8ee1f856683e	0	0	0	0	5	0
1a2ea07fdb5821aaf2042b960c79a0bc	101	136	48	0	0	0
1a37d2ac19e2816460e28daac100ec5c	0	7	0	0	0	0
1a43a859f03bc79997637ec570a3d7c2	0	0	36	0	0	0
1a45ed9da04b7af0ee2ec3cd7f5f8565	0	27	0	0	0	0
1a4a62352938d61024606dc44f29c477	0	3	0	0	0	0
1a4f9617b2c27cdbcb816a22e30c4002	11	0	0	0	0	0
1a526145079e9a46b18500e1879b379e	0	0	13	0	0	0
1a5b1e5242f56beb404876a5312b0db4	0	13	0	0	0	0
1a5ddcb8c971698193464e39acb416bf	6	0	0	0	0	0
1a6b2886e5c62de149e888f48c6ad7ed	0	0	7	0	0	0
1a6e42baac42c9db4a624c652b69b268	0	0	0	0	0	5
1a710f4d2ce3487daf23a669ee832549	0	0	0	2	0	0
1a7538f30ea5dfd92b8db3cbcf4ddff8	0	9	0	0	0	0
1a8112dcc9c0ff67c34773ca500e56f4	0	25	0	0	0	0
1a8bfd995168070887c187b691bcd73f	46	72	12	0	0	0
1a8ce5b0c48e9c8c49d07a26f8e0ba2c	0	0	8	0	0	0
1ab2af8f9e57736e28d167ff3a1e95e2	5	43	20	0	0	0
1ac30810c4919137ce249157c2dfc56e	11	0	0	0	0	0
1ad01c950f08e1e054b8055ab5529176	0	0	0	0	45	0
1ad5a8a0ca2867e6844b48b49cd8508d	36	0	16	0	0	0
1af58488585b71b5efb0c981a362840b	0	0	0	0	0	18
1afca4ca74151c1baa52bd863bbbd077	0	0	22	0	0	0
1b1dfb808ed39de533d8830fb03ac61f	0	0	25	0	0	0
1b407812dfd51ca388a31e30f736ce3d	15	0	0	0	0	0
1b40cf34faa934ff124ad2c94d7566b6	4	0	0	0	0	0
1b491f533907083f0625c24f78a93490	0	0	0	0	0	232
1b49697fe5a847efde3660d1ce0b2804	8	7	0	0	0	0
1b4e19426e5952004f9100035a862991	0	0	0	0	0	74
1b4e895f0fb5fd4efce97c67f062cc24	13	0	0	0	0	0
1b527fb86a5ca3cc25c2011b03999999	0	0	0	8	0	0
1b5aaf4adad443609bbb70f311c593bb	0	0	0	0	8	0
1b6b83fd9fccab22137276a0c488ec60	0	17	0	0	0	0
1b6ff0fd11d9b96c5d640e212ded83de	0	5	0	0	0	0
1b8982227b8ecb8ed6bdbf1f24113161	0	0	0	85	0	0
1b95e3ee635f770a864fffbf51a16c4f	0	0	0	0	0	56
1b970e046df0214531aef499a420bc2c	6	0	0	0	0	0
1baaba23f9bf06085cb85d2c1ec8bfaf	0	0	6	0	0	0
1bab72cf018fb2a1e6f01cf4c4b18181	0	0	0	0	0	44
1bb0294f4f4f41fcb7a5fd13e02dcfe0	0	0	0	0	0	5
1bb7f29ecae39935bf493a397663087f	215	36	135	0	0	0
1bbbaf28266a98b37d0941cab8080a6d	7	0	0	0	0	0
1bcaa162c965e1c9cb9482af55130acd	18	25	16	0	0	0
1bd2431cafc78afc866f4d3ba1c4f006	9	0	7	0	0	0
1bd43b80f456d4068ef5315c0b448a98	0	29	0	0	0	0
1bd50496bb3cc99c5f95fe86c9aacf8e	50	21	115	0	0	0
1be3a3951111e62b3bbd7e0dd52b6da0	11	0	0	0	0	0
1c1b6a833e29ed73e8645e9ec62a3f8f	87	0	0	0	0	0
1c25faff9be13a4836e365facbad9562	0	0	0	7	0	0
1c28c183c8bf23f46663015c4c028b9b	44	48	59	0	0	0
1c2fb058e7fc3a0d1a6ddd730f9b87cb	53	19	0	0	0	0
1c4b84fd26b7e24cc23d46573525b22f	0	0	0	19	0	0
1c5b49afc3007b27cc0b2f9a52a7b110	14	0	0	0	0	0
1c5e0fa9bbb74d957ca8acd893978cef	0	26	10	0	0	0
1c606b67231545c21f94adbb89148eb7	0	0	13	0	0	0
1c68fecfd317d55a5ba3fef36d817ace	0	0	6	0	0	0
1c72dc74593b26848bd20db36fa0fa21	16	5	7	0	0	0
1c77a4b35e7a907fe32018abb9fa0090	0	0	0	0	278	0
1c7f6704d2656cd97c59fe332c421d36	27	51	82	0	0	0
1c86a886a9a2340d9c879655ebe98f08	0	31	44	0	0	0
1c8f2e9c0f54ba28016d81372d21a855	0	0	0	180	0	0
1c91188417556a34ea629b189d1fb76c	8	0	9	0	0	0
1c94273b158d9b608217f628490d3e2b	0	0	0	0	3	0
1ca12e7e2dcc4023960cfc815a47db65	0	0	0	0	8	0
1ca6d721784aacda2caf985f2025d518	0	0	0	0	0	2
1ca77b74c088054d6013601e215259c8	32	22	0	0	0	0
1cb3d16bedf1292bcef0d1d88d0b4e34	0	13	0	0	0	0
1cb99c3be7048538eecc251b68792a25	15	0	22	0	0	0
1cbed735ae98c288b0ccdc8f5c50e135	154	134	164	0	0	0
1cd7ccd5eae3bb9d019368e2f956c1e5	0	0	20	0	0	0
1cd92b2c90b09e1c301972a99e99eebf	0	0	0	0	362	0
1cea1e1f62820d5c7fcb7144dcefbbd2	10	0	10	0	0	0
1cefb9e45a31f0d85708a1e1d2dde772	0	0	4	0	0	0
1cf507b4d874a1f1b850091a1558394c	0	0	15	0	0	0
1cff5ff54fa9818fffd58908be7141a5	0	17	0	0	0	0
1d05fea503043ac34f76336354aa0598	8	11	24	0	0	0
1d1760b410fe3ddc29d345bbbbfde38c	79	82	130	0	0	0
1d1f75e806f38351388c90d62c21929a	0	18	0	0	0	0
1d20cdd7c21f71e4ee825df6ea864786	0	0	0	18	0	0
1d26476053b8d3f47665cb477fe7fc8d	0	0	4	0	0	0
1d2f5f61d57e04776d00412dc9b0d4cb	0	9	0	0	0	0
1d30e4aa0862f845abb2f7d7d07a9b80	4	0	0	0	0	0
1d31d16118f6c201a30c4cfa2a5dec93	27	0	0	0	0	0
1d3216638e0814b330278b64fefb6162	30	26	58	0	0	0
1d3c676d5555d4b2aa01154ec1d44206	22	43	130	0	0	0
1d4d1ecf9c4d99bd64fec7db761628fa	0	6	0	0	0	0
1d67e46a9c9d125d603f79b33041a1f5	0	17	0	0	0	0
1d6ccf4f2ee22543148e7c8c389785a0	0	0	15	0	0	0
1d7a7ecd533a3f0f6a80c901056c8743	0	10	0	0	0	0
1d818253c5f619bac171b5b16f3c332d	0	0	13	0	0	0
1d841366689733405bd0a3bcf28f6e7b	0	4	0	0	0	0
1d8671b75f107a21385cb5e6080e371b	0	19	0	0	0	0
1d93a72ca973f65a4a6d98e32b2dcd4f	30	18	13	0	0	0
1d9b048eb2a94c8884a62be15b38ffc3	20	18	0	0	0	0
1da765f94cf198bff7868f95f33a48ab	0	2	0	0	0	0
1da9d26eb138e0f6c0fc0d5c5fe89a51	4	0	0	0	0	0
1db3745c7afaa06dfc576e72ddd71e64	17	0	13	0	0	0
1dde54caa16058d3db5e0580ec004431	15	10	0	0	0	0
1de26da9251fbacbd804c263e5c5075b	0	23	0	0	0	0
1de33268c8ef501414fa280adaeff9c1	0	27	0	0	0	0
1de8a8bc685293bc92fccfd080dd1a64	0	15	86	0	0	0
1e0aecfab3619651baea6f2a350f92b0	0	16	27	0	0	0
1e1667df4e9ceea408103b43b3368562	0	0	0	0	14	0
1e173d5f38a2d59f66f09f6cd6a315a7	0	0	16	0	0	0
1e174b31ffc62518b08452e83dc90694	0	0	0	0	3	0
1e1f533ce91100651cbf052e05925434	5	0	10	0	0	0
1e21a4a3b11a601a1a8d5607b2024ba7	286	78	124	0	0	0
1e3681bfcfe2bec18b18c867516ceb76	0	0	14	0	0	0
1e37b385dbd9284cbcbfde549507fead	0	0	11	0	0	0
1e3c2809242d9e4dbcb4f975647f7f8a	138	30	12	0	0	0
1e45457cd914d167ed9166f5c291b5f3	8	0	16	0	0	0
1e560a603ec73c71f7e28002df36a693	0	0	0	0	0	18
1e6383459fe20585f184ca6f65b6412c	560	669	574	0	0	0
1e650e9353ce7c89616006e1c4b573e2	0	0	0	6	0	0
1e67fefd71f042847ababf9de11d4f03	0	0	0	0	5	0
1e6cf8f6cd740922efdd71dfd72b1723	55	49	39	0	0	0
1e6dbeeffa53a48c5322bce44b707d61	40	39	0	0	0	0
1e7d3cb1309e362799989ce3dc9e714d	0	0	0	0	2	0
1e8866587eec6359a45743b764bbc4d5	0	0	0	407	0	0
1e8bed6559396dcbc29d27c18175ad1a	10	0	0	0	0	0
1e8d48d8fad754743196d9954e4692c0	28	0	0	0	0	0
1e92304a5271946334c0ef353ffac4bb	0	0	12	0	0	0
1e950338b941db69671308cd71c2cf69	0	0	10	0	0	0
1e9ee9fe114490db7cc8c9d2418069a3	0	5	5	0	0	0
1ea7da8f508a4c37abd41ce6ee852196	30	21	27	0	0	0
1eba4273cb72fd8fd45028e127deba39	11	0	0	0	0	0
1ec9a9d0b2c5880cd3ddb63a4408e915	25	0	0	0	0	0
1ecb8543af3e7933c0b2190d28b76b2b	18	23	0	0	0	0
1ecc7913f91dff584f0a9c9f75e28103	10	0	0	0	0	0
1eccfc68d1e940e3f9bd01ec145e3ca2	0	4	0	0	0	0
1ed42c38d3aad03952113a1d2d807bfe	23	28	42	0	0	0
1ed93dc861200fe39b84ce6848912dec	0	2	2	0	0	0
1ef9b3970ce02181a0837eadd12b1f16	13	7	9	0	0	0
1ef9fea1b0afd1e37988e4e6a4022927	0	15	0	0	0	0
1efb9b6934734689c84b73e463275eb6	0	10	11	0	0	0
1f02120615d513c4f895b434ce0c2729	155	125	144	0	0	0
1f08ebe843d2334680d89a75d86fe8ae	0	4	0	0	0	0
1f0ae75263df5f8d555ece56ab830b69	0	6	0	0	0	0
1f0cb3909058e0b3e5dddb0dad280b96	0	18	0	0	0	0
1f0d645bed9f0280f3e7a700dbf608d7	0	22	0	0	0	0
1f125dc812f7db2ab040d6f2c20ef2d9	11	0	0	0	0	0
1f18f0e60cc08f70f7447ad8b3434c73	0	0	11	0	0	0
1f280fa535502f6b5931579b553f24ad	0	14	0	0	0	0
1f3756c8393eed49fa1d48da595d2d4c	0	0	25	0	0	0
1f486503aa568943af0dfb596db7c027	101	59	103	0	0	0
1f48ac2651007b216fd3f62e706f9235	0	0	0	0	663	0
1f4d02fd9b0304333c009fbd12bf81e1	0	0	13	0	0	0
1f68c67782bd7125bb941ac523b54a0e	44	36	33	0	0	0
1f6cd22849d5154592a7f698a632bb9b	0	9	0	0	0	0
1f7c34e8a9dba8bd772d44e0c4960774	0	13	0	0	0	0
1f82e324a2aa1fb8f8276c1755deae02	19	0	0	0	0	0
1f86150c91b80adbe5620e090960fe99	0	20	0	0	0	0
1f9230a343d3991ac26e44208f194880	0	0	0	0	0	268
1faa92f9908f39f94e7157fe0581d3ba	0	11	0	0	0	0
1fb3888514a8908be4ae354ce9b45821	0	0	0	0	32	0
1fb46b546ebb7a4e05107a2ca43793ed	0	0	0	0	0	21
1fb7eb6d9812ab2f21e39c1dac29d029	18	0	18	0	0	0
1fc17c05137a8bde9e824b84709164fc	4	0	0	0	0	0
1fd086072afee9e676e2406b43f7bff8	0	9	0	0	0	0
1fd337f8d2bdfc7815ef97bc7c024571	0	0	36	0	0	0
1fd36a89247d2015548cc133fb89b760	0	7	0	0	0	0
1fda51f4c94019fb288e8d0138422dbe	16	0	12	0	0	0
1fdadd1a4cbabf2f49d9f6cd2960f599	0	0	0	0	59	0
1fe525b80737d389e95c178d64899a2c	15	0	0	0	0	0
1ff022924b546db3e0fb167933bd627b	0	0	0	0	0	20
1ff38df9332d12fb91e87accd763458c	0	0	17	0	0	0
1ff579174c307fbb8c41280b0477292b	0	7	0	0	0	0
1ff65a8fa4f4933ad1c6d0455817f595	13	0	10	0	0	0
1ff85225ddc064107baf86e8620ced83	111	33	65	0	0	0
2008de66218a0a614cf026338a368733	0	0	0	74	0	0
200a1380ed8e770afe7490f4796f15f0	6	5	0	0	0	0
201cda18db767679a350810c3f896492	0	0	6	0	0	0
201f8f2b7fdfe5eafd77c8ef99405578	8	14	16	0	0	0
202a98aad95a144d6660981f4a58c05e	0	0	0	0	260	0
2054031f34f6b77246de87f85f1de303	0	0	126	0	0	0
20661e46eec6a9ce0b255bbce52f3727	0	0	15	0	0	0
20698e77ded74f2bbf4c9b7f01249fc4	0	0	4	0	0	0
20757fccf4f6ae2b921845b47abd47b6	0	0	3	0	0	0
20793e0b28f3e5886009b9e1111698ea	0	0	0	0	66	0
207d0e202bebf52dd1ad2efabccc2197	0	0	0	3	0	0
20830150fcae40c7104af89ef6d9f8aa	0	6	0	0	0	0
2084437ee2c4f463e8142140a3b3b6ae	0	14	0	0	0	0
2086ee69ec91b203f44d6aac80de98c9	10	0	0	0	0	0
208aaa44ab0909a9ef8b3cbd432b67e6	15	25	59	0	0	0
20964991e1d5022e0821fe6f4c963666	11	11	9	0	0	0
209fb5c8c2b868ae5d60fde49044f479	19	31	21	0	0	0
20a2c697420256f9962a92a82b0ba949	0	18	0	0	0	0
20b8febc2f87aa6a1e83f17dc5aaa77e	10	0	0	0	0	0
20c16c62ba24732cf26170eb6781debe	0	5	0	0	0	0
20c5c4210e45559caaffbaea8b4fe2eb	0	0	0	0	0	20
20d6d12f5d96406c212bbb740c5ddf33	0	0	0	0	108	0
20d759b4dc8e3fd47db6555aa1f215ec	2	0	0	0	0	0
20d9def83ee16e7d77d49efc34fc964a	54	33	66	0	0	0
20f3525dc37be9c3c760ad6dcf6f5152	23	20	26	0	0	0
210326ac700379ce5f92a3b4ef338bc3	0	12	0	0	0	0
210be2697d135b6d1fc8d23247ca7480	0	44	0	0	0	0
211011a8aa617878e7a042281d734436	45	70	63	0	0	0
21113181b286436b51e2fd4d7f1a2064	0	0	102	0	0	0
211990b94f340e0dc692ba9a73ab079e	0	0	0	17	0	0
2124d9f10858ab28138945ae788950ea	0	0	0	0	0	28
2125cc6992b9c17307a5d40b71f84a63	0	0	39	0	0	0
213054daae1114d8d7025a2307c660a6	33	0	0	0	0	0
2134b99aa9dd49df2a47f8f322a057a2	262	102	248	0	0	0
2136b89901b7a7ea1e532c28b26b27c9	0	0	19	0	0	0
213df5e5b6c1a3519e4dda3be8c9d9e5	2	0	0	0	0	0
213e91cd4e7f628ae7bd8d18d4dc8283	0	0	0	2	0	0
214005d9cd440c12a21fb382add429f6	0	3	0	0	0	0
21466d44e9c1cf40b98aebfe20cf638f	35	17	0	0	0	0
214d88f6db6796fcf2897d0f6b5751dd	0	0	0	9	0	0
2151c867d2144ca2230851e837c374cb	0	0	0	0	282	0
215a601e5b2f1c34be5652da84dcde18	0	0	0	12	0	0
21619c43ac7571fd81c0b0459effb720	0	0	0	5	0	0
216e26972948df3a69a2d1b947b88470	0	0	8	0	0	0
217078631f98861be213ff50d3ab31f8	0	0	15	0	0	0
217e7acd7ad3a52c35d5b82e699644cc	0	3	0	0	0	0
21841caa57f559638f6c8020a594d0a3	0	0	0	0	5	0
21885106f55cce0e4e6565fdebc32fa2	0	168	0	0	0	0
21885147c494525aeb31f9d1fd1c026e	0	0	3	0	0	0
21889d626f0be589b824b53e03372cfb	0	0	0	15	0	0
2191560c25cda73f21f4af84735da57f	0	0	28	0	0	0
2192f3526c9b8e8ba93533c8f1d0d8c3	0	0	36	0	0	0
219886691f430b98b0626471c418c5ed	0	0	0	0	125	0
2198f717a0e802bd592935c686203389	11	0	11	0	0	0
21a8b78f27f13bfb20f43bc2164e404c	0	0	4	0	0	0
21b5db64e7e9c227a40f1fd8b865f92a	0	6	9	0	0	0
21b967d1d8b72e89b56e14a01ab7c124	0	21	24	0	0	0
21c47ce7835c803aede78d5bf66c8791	25	241	188	0	0	0
21c503619c0f40ee440bfef69be417cb	0	8	0	0	0	0
21cc99cfc02ed11cab38eb4f13c60f4d	0	0	0	0	0	289
21d062fbbbd7b99da4126e71522ef69d	0	9	16	0	0	0
21d3cf15a48a132bcf9aefc215f698f0	0	0	0	0	0	32
21d7264a779fcb87fa58190556e45a91	0	0	0	9	0	0
21d7790ddf5c069a103a4ac0ca788446	0	0	20	0	0	0
21dbd1e2e09ac47ce2767109fc96b830	9	0	0	0	0	0
21ebc617b1eae7d637dd0552d68a97a2	0	0	7	0	0	0
21ef42454855940699b04836c31dcf6d	0	4	0	0	0	0
21fe2546cc02d81e5470fd32c5b54dfc	0	0	0	0	2	0
22125a2b99080e45089f896a03747f63	0	5	3	0	0	0
222d7778de1ff81fcb7d85eb8cde9b4d	0	0	4	0	0	0
223d3430cdbab9e4bbca526b08a25611	0	16	0	0	0	0
22467b1011d334341a9474668bf45815	0	0	0	0	0	47
22596e4cf72d404286f0b6b5f1560f5f	29	0	21	0	0	0
225c214be44851578ee9fbe5f47a2c6f	52	43	62	0	0	0
226097bd7a1661a286a3b62d1c1f0e3a	3	25	15	0	0	0
226d266020b9eb0576c45d023ad1d386	0	12	0	0	0	0
228b79fb747266afbddc1801db868224	0	21	0	0	0	0
22a2b5ca4fa259c295f1fd7125bc3620	0	0	0	0	5	0
22a70d33321268fe4d076e2a971991f3	0	3	0	0	0	0
22a8c2b940860271fcb7874d28cd4812	0	0	9	0	0	0
22abbac3609e08535cc434c4d70460f9	0	0	9	0	0	0
22b50ba13f44a543aadbe3a41806301e	0	0	34	0	0	0
22ccde315e90752a06fe42380d448e11	0	0	0	0	285	0
22d9872fa910c6e58151ce20a568a911	0	6	0	0	0	0
22dca4253e71e2b4940616c80a63ac02	0	0	0	21	0	0
22e2fa93337cb1196f9d16425ab393a7	0	12	0	0	0	0
22e514cf9dfb0f7173d439e52a37b204	6	0	0	0	0	0
22e6623081acc216744e0230ed49703f	9	0	0	0	0	0
22eba34e204cee415c2cbbb4130bbeaf	5	0	0	0	0	0
22ec6c14e2e71b2429227dc4293a9891	0	3	0	0	0	0
22ee6645a99a17db1899a0691dcf6341	0	0	0	0	0	3
23063295bad8f8caedc5ba7cdf2c6dbf	0	4	0	0	0	0
2313221b978610bda2b3e3cb918013c8	0	0	0	0	5	0
2315d352742037e6c8909957c9825102	41	0	0	0	0	0
231bb535ab55e1e7f5a8ab488e016469	29	0	0	0	0	0
231e846bc076f93da2917047b4505ec9	37	0	0	0	0	0
2325745a79dda9ce065bfdb5c2f88275	194	240	241	0	0	0
2326cf0e586ba9776ece26e255dae86c	0	2	0	0	0	0
23274aca5d12c3151ce521810a803f49	0	0	0	0	112	0
2329f63e26021f612a61b3593dec0e6a	0	0	0	0	240	0
2333ed4724f900b135e27b2ce2299fd8	0	3	0	0	0	0
2341ad2d6f4dbcb97882f20861be8735	0	11	0	0	0	0
234665ab8bfb434b73105781f3988f5e	0	0	0	920	0	623
234c66e41d0fefe1fd232df84976d551	23	0	0	0	0	0
23527fa0d1f854527e1895fd37a10e30	0	0	0	46	0	0
23609e280099d281323ea8c345699cb3	12	0	0	0	0	0
2371f639b99ba2b5580d67764015956e	11	19	0	0	0	0
23737de84f4dddf6f9c79ff1d585318d	8	0	0	0	0	0
23895050c34c5c59970adc5ef2fabc5a	0	0	0	0	547	0
2389e9cb5124851bcfb61a0e23c32036	0	0	0	19	0	0
23956d36de9b7d0b378a8be9640d1181	3	0	0	0	0	0
23973fa943618f0a4c3ff5c4bf6422a0	9	11	0	0	0	0
23a841851c33da9cea136160662697c7	0	13	0	0	0	0
23ac2b37cca365b32a6cfbcc3b7a7f4c	0	0	0	0	23	0
23c9d067db1177a893ebf2e9903b74fb	153	131	124	0	0	0
23ce8bf070798e0479b723b1580bd657	0	0	0	0	0	648
23dba869ee57820432253789d6626f2d	0	0	31	0	0	0
23f2efb78b7f6c9aff864c54df3e9f9a	13	16	25	0	0	0
24135381ce35dbcc04ea57d7b7fc3dd3	0	0	0	0	67	0
2423e1bf7e2b7b8d26a87c44ad4bb180	15	0	17	0	0	0
243164b101d6e84140518efba6034106	6	12	0	0	0	0
24355416d4867b913bc4a68064ce70a2	0	0	19	0	0	0
24375e0adac5f45ae2570157cf88161e	0	17	0	0	0	0
243cc90573538e0e19f7e3dd6a495676	0	0	11	0	0	0
2441a10c17804e476791320c7c5a9333	0	3	0	0	0	0
244a28f66d2827db785c863068852bba	0	0	0	8	0	0
2471d6557de93a450e6e2a43b163699a	0	0	0	0	8	0
24761b266c86bf6e1ac5e41b079ed45e	0	0	6	0	0	0
24783616b5a99bb77b18463190da0bf0	97	91	103	0	0	0
2485f3940b9d8f78e4e15a69e775ddd0	0	0	0	0	2	0
249201786226e8fa661200af4df63e03	0	11	0	0	0	0
249bbc9d260397053e8e7c8960cdb049	0	0	46	0	0	0
24ac0f14ad489c711b9853ea84726a3d	0	0	0	0	0	2
24bcb12a81e1c20f863d5103c092e273	0	10	0	0	0	0
24bd4a41dca4d277da378a130f642ef8	0	6	0	0	0	0
24c256e6236d402ee58ff110197405be	23	0	20	0	0	0
24c51df570756f1f5da7d9980208ee7c	0	0	13	0	0	0
24c6ebed87e29b904fa7ac67c87f82dd	9	0	0	0	0	0
24d121d7c5ef900a8202fac53fac5f13	0	0	17	0	0	0
24d320cb34bd5633fcafc5229e89e7bf	0	2	0	0	0	0
24edba2c7d650d303d10cc09bc7a97a8	0	0	0	73	0	0
24f81f76eedf1eed549b86d62a7d6155	20	19	22	0	0	0
24fba163662f248c3cd52b5d89800050	0	4	0	0	0	0
2505b9ec8a8aaccbeb19b57eb3dd57cb	0	0	20	0	0	0
2514ba97eeb3ec6514f93e66f4bc3be4	59	42	35	0	0	0
2519b552ac09608fb2ed7c1bfa3caa6b	21	10	9	0	0	0
2526b052bd7ea77ee2bf965d57995dbb	18	0	0	0	0	0
254ad434bb2abc71eaa53939533650eb	0	0	0	2	0	0
25504de4412c1892e40cec0a97171fc1	0	0	0	0	9	0
255153d3033615b00681bf49c6ba1fa0	0	16	0	0	0	0
2560579380244b934d4e4991972ec92f	0	16	0	0	0	0
256125a280e2ae5b0fc3720553bc82ef	0	3	0	0	0	0
257ceaf1750d79e23e1ed7c97aeb14eb	64	39	42	0	0	0
2588e284f8983aa809d6e16b8560aa50	0	0	13	0	0	0
2592589655dd4eb14a99db9529d8cfe5	0	0	0	0	5	0
259802a1c8912b50c20886c72495cf0a	5	0	11	0	0	0
259ca873b26c31ecb8532896456e2556	0	0	8	0	0	0
25a2d86cadb848b5499512375d6869dd	0	20	46	0	0	0
25a588eb4d0fcf093ae860371eae053a	0	0	0	0	0	92
25a6778b78c43bc142e9a3a1cb1fee9e	20	0	16	0	0	0
25a9454079faea32eee1dd36593c5caa	15	0	0	0	0	0
25abb594a07f82258b5cc3fc94ffefd2	101	108	104	0	0	0
25b0de1f68999e3d6c640dfe9a930dd6	0	0	2	0	0	0
25bd503c3e86a6bd926d0724584b804c	0	0	0	1444	690	0
25bea3407daf36754fa59f4d37d84d6f	71	60	70	0	0	0
25ca61fdbc3a3a7ff747278f8c84f172	0	0	8	0	0	0
25ce0bd4b53c15dc5dab2f84b0bcfe8a	5	0	0	0	0	0
25e53f291baeba2202541d7a09253676	13	16	17	0	0	0
25e66412d5d3929fdd2e88b4a4affff2	0	22	78	0	0	0
25f3c570de6bebf90bf111b96e7c4b66	25	0	0	0	0	0
25ffdfa3dea519757acebdb5198e0f00	13	0	0	0	0	0
26099d1ce2531df7d26b2eb37677e3d8	0	9	0	0	0	0
26110cc9b6858e36096ad91d237849ef	0	0	0	0	48	0
2617a855e8b8cc176940cfca1028efdf	0	0	0	0	0	15
2626b8b89084ef50c3e4f52c4e0b7c4f	94	86	65	0	0	0
2633cf04ffab5e2695beb08e80792d3b	0	0	0	165	0	0
2633f682eaaf182ed9b6a88a7ee8105b	24	42	30	0	0	0
263ce526d7cbd8db4660ff7d3c6930c3	0	11	0	0	0	0
263d0aef020ca1f573c0421e61034298	32	26	31	0	0	0
263e668556f67ead5ee295f9c9324049	0	0	23	0	0	0
263effc26221fcc84db331b1174378b8	0	0	0	13	0	0
26408c1af1906a8831c933bf79a2ad8e	0	0	0	0	203	0
2640922f8d39450180e9ccd9e4bdc2b8	41	0	0	0	0	0
264985cfcab8637e2bf7835fc17ce37c	0	0	0	2	0	0
2649aa5427d1c72c1cc5fff2d8639f70	0	0	0	273	0	0
264b75e6aa92c37f00f10f1aceca3361	14	0	8	0	0	0
26503e730b19024c648dd8d4857089b1	36	0	30	0	0	0
2652d507103b8eb51f68cbbf71596f7b	135	16	19	0	0	0
2668d7b1ec794dceb55fea6a21533987	0	0	0	0	0	59
267698de81e4d2b543601dabf41ad840	10	6	0	0	0	0
267875855c221796e470f5f9b0480cbf	28	14	0	0	0	0
2694ff83e70357a533b40c2f0c2929c1	0	0	7	0	0	0
26961a5fc05050f98a92b7e065320daa	59	79	84	0	0	0
2698ec3a012e80e6aa41073564916fd7	59	68	99	0	0	0
26a51ed75bd909091c87ba3b0acb711b	48	0	26	0	0	0
26ae4f08f3b2e7b3dc60e2d2007be8e4	0	0	0	0	0	25
26b4847ae8baa644a7104212acbae349	0	0	0	0	0	27
26c5da7c9637a470b15e3786c6ee78cd	25	28	0	0	0	0
26c9ce16a453ef9777cfb316e835c62e	0	4	0	0	0	0
26cc3d3886f139f61dcfe0f3140e1d3d	0	28	54	0	0	0
26d0a719f47517babdd4a84b2ee6baa9	0	0	7	0	0	0
26d3bef130c992a41a90b8058ba37081	0	0	0	0	46	0
26db3e513bee09d27fd4d7add56ed0bb	20	32	0	0	0	0
26e2773445e410dc7f4657012b0d2946	11	17	19	0	0	0
26eee6929899362ed709e34502660a75	6	0	0	0	0	0
26f181ab68be486f8be1489be2da2c48	22	0	22	0	0	0
26f3cd9f3be3a2043ae5fe73b16ae7d0	0	24	0	0	0	0
26fcb3a64d48023373930ab03a3b9780	0	0	0	0	52	0
27102e61b5c382ada0bb030e844bd106	0	0	0	0	0	221
2719cfec034612a5aeb2a4a798b05f04	0	2	0	0	0	0
271dc76bd2cd7618cb54a2395443a04d	452	339	444	0	0	0
271fa7a75c4792536ba89b389f3af8f6	39	17	42	0	0	0
2721c76818698206b48041021ef70a8f	19	24	0	0	0	0
2727be4ece27e2d8863da419d23d8569	0	0	0	536	0	0
273d6cf4ae3d292bc74975232d063114	11	0	0	0	0	0
275576ec9e21b48f4db0006758fb2334	0	0	13	0	0	0
275a2523c134852448651422445e29b3	23	0	0	0	0	0
27690f8639c57326b7a68aec9bac212b	20	0	16	0	0	0
277d1338ce20ffbaeb81c6a53042ddbd	0	8	0	0	0	0
277d340a92b4365e0bbd8880cce6ed10	0	0	15	0	0	0
278941518f2a7898ccfb672bab191319	0	3	0	0	0	0
278fbd6cc319ac337c2b40c24759839e	0	0	8	0	0	0
279124467151a5237f587c62bf3127cb	78	45	58	0	0	0
2795d84caf1204e8f1dd4954294cebb1	0	0	0	0	209	0
27b857f995c15a073e7b06e5c8e42b59	0	22	0	0	0	0
27bb8cd53e6f0e4e4b643f37034c7e1f	4	0	0	0	0	0
27c8a86b35998a0bc6cc4fc407a715df	0	5	0	0	0	0
27d5d8cc9321e90577f6c1d67a573083	24	21	41	0	0	0
27dcdbc4226f2c3ce0eac7b442a22b58	0	0	0	0	0	585
27dd354470fa6588f6e4f27b0ad33c79	0	0	0	0	93	0
27e2ca30f91937432450ef8c4f40478e	0	0	103	0	0	0
27e70925ecd5cf1af6e4c431dc233135	82	43	81	0	0	0
27ebf06d157cafaa964c0f6a884c8384	0	0	12	0	0	0
27ece21f40d0725872d93c2769638d0a	0	0	0	0	0	58
27efc4b782461b3a5f4f0dfefccda9e8	41	0	0	0	0	0
27f376998de656748ddcd9f94a51345a	10	0	11	0	0	0
27f46e843d01c38a9b0523675badff03	227	209	233	0	0	0
27fc78c0df7c28c4fd3115bb7c5d1e4a	0	0	18	0	0	0
27fd0fe869e71006ce7da5f9fa3de39e	0	0	0	0	0	2
27feacfee4f5baae127cb66ed73b5a3e	0	0	13	0	0	0
28130ce3c2c40bebb6f9956018f5052a	0	0	0	12	0	0
28142d33e90df95d799b37a15c78e2c2	0	0	0	0	0	22
2819b0e492b953594921299db1e9a02d	0	8	0	0	0	0
281c43dff6af0ad109ecae133d8a455c	0	0	2	0	0	0
281cbe128a570eed70dbce0cf1ae084d	0	17	0	0	0	0
2825875c9d54e6d79f399b5daa63aba8	0	5	0	0	0	0
282e2649da4766b0c0d4af84e5d0f42d	0	9	8	0	0	0
283600d6ab1b6a9d817cbab0da3d09f2	5	0	0	0	0	0
2838794a88fee0fb09365c86212bc496	0	0	0	0	0	56
283cc79ba14923c3f22b98e4aaba7997	272	42	235	0	0	0
283ce05a49054680c12eb28760835168	0	0	0	0	0	264
2847553ac5c64ad49babba88f06687a4	0	4	0	0	0	0
285cadb75ceae3b4c1ef2538396f8a4e	0	4	0	0	0	0
28704e6bfae4496b2fc9f19be9420cb3	0	0	5	0	0	0
287c8446cef05d06c0b3dc5e9f377993	0	28	0	0	0	0
289be9f27c49af93e6caa699e0c56d1d	0	15	0	0	0	0
289fee6bb00c00a3310068c8539494e5	5	0	0	0	0	0
28a52b67f8013e85c759cb896782908c	0	0	0	253	0	0
28abc3a2dd1d923d33691974e125edba	10	85	29	0	0	0
28ac9ea6ab95cef7f194be2677c0654d	0	0	21	0	0	0
28ae5392ecaadb0e88254a9a96939332	14	0	0	0	0	0
28d0fdf308c5e0b8d21e4b22c90589db	0	0	0	4	0	0
28d23fa594e4efc6f68515b0e6442dfb	0	0	18	0	0	0
28da7ff05f5895b5aa3469c15f98f398	0	0	15	0	0	0
28e8ed50348b3307d2deda58b9213cb3	13	0	0	0	0	0
28e8f372e42355e2f2429c55d2756d2e	0	0	0	0	0	4
28f66a4912279bae338b00bd2e18a906	17	0	0	0	0	0
28f7ef72db1060d5fc987a9f95a29c97	0	0	4	0	0	0
291e676c4b43b4a476f1cdebc2fd27d7	0	0	0	0	0	993
2921def892e2fdbacf9f40e7595f56c2	25	0	24	0	0	0
292227dfc741b5d0dc279faaad111752	0	0	2	0	0	0
2924b60a9b19313acd7c18dc31fc52cc	0	0	0	0	0	8
292cc9518d8ba4b4ebd72023bc2d7f7b	0	0	24	0	0	0
292ede67f7e97ad89c77bf9ea70ff9f8	0	0	0	0	941	0
29345d40af9caaf742e03b992fd08013	0	0	0	5	0	0
293f2d11aed34c40d074a7a752792601	0	4	0	0	0	0
29550a494448a60ee735d9854d1c9c35	23	31	22	0	0	0
295ab613906ec0811ea1b02012a9e1a0	68	37	29	0	0	0
297aeeb119b13b3870ffe0ff07056f38	23	18	0	0	0	0
297d900e62cecbfba068e5d14bb1337f	0	12	0	0	0	0
29872a42345cd5fd6a9e15901d65eba3	10	0	0	0	0	0
298881b132dfe7d26a01c7e2e8fd2f19	0	14	0	0	0	0
2991a5cc12f84d87397d3c9763558d03	119	51	115	0	0	0
29955c296f2722a64d46303e766c37dc	16	0	0	0	0	0
29965c5ffbbb8a31eb68c7320271833c	0	9	0	0	0	0
299fd0a4a5f521933c9a66a9d8f8a13e	0	0	27	0	0	0
29a1be2bfd88644b2c6007ac6a0f1014	14	0	0	0	0	0
29a8b15c940c6247c2416f862e4e9e68	37	0	0	0	0	0
29b316cb38f003568d6e23153ea19143	0	10	8	0	0	0
29b4d22752637f6f2b14e8637e887393	0	20	24	0	0	0
29bcf441f843d3152a50c20a38a29a77	45	0	0	0	0	0
29bf54c796a3154ba9a0590552dce00d	0	12	0	0	0	0
29bf9c8790f10f53b7ea5f6bc9c859bc	0	5	0	0	0	0
29c70fa5ffec382cc37148ce8c85b746	56	0	0	0	0	0
29d07ac76540e2eb9b492cc49149bde4	71	159	22	0	0	0
29d853ee49222d9ab16e73fcb25c35b8	22	15	23	0	0	0
29dfa7cd7473735b210d16c649661a73	16	9	0	0	0	0
29eb4715cec01483ab5fa60f77855ff5	0	0	0	0	9	0
2a1e81939f832f501aed42bae4c5572a	0	0	25	0	0	0
2a21c248a3f4b0a4bd790340eeef31ad	0	10	10	0	0	0
2a2cb8b3caf5bca6f201cee6a795c2a5	0	5	0	0	0	0
2a599cf02652ee97b6e879f99c9e85e0	0	0	10	0	0	0
2a6ce28d88865db6dfd00333781e9bbe	15	0	0	0	0	0
2a749a128ff8f020832df20ba7a127bd	0	12	24	0	0	0
2a76d58106e8f9130e5f3f334207c327	0	0	14	0	0	0
2a7fe198f48358316c130262937f467b	0	0	8	0	0	0
2a843d49813340fdf29d75f844c7bb02	0	0	0	0	6	0
2a88d08ec6ad149aed3d6f118c7b67ab	0	18	0	0	0	0
2a9ff14b9eb9e40f9c87a54bb31eb3d0	86	29	108	0	0	0
2ab295f2aae1804186b1a11815d53f22	4	0	0	0	0	0
2ababc9257f01635c7284f7a3103ae5a	20	0	11	0	0	0
2abaec7069136186269e4d962a441648	18	0	23	0	0	0
2abf4da8ddf56cd6cea3e4d3822bb608	0	0	7	0	0	0
2ac3efece50bbd0a2f7a0a9e440bd029	35	30	48	0	0	0
2acbe771edef77f5a6d3603c1a824e23	0	0	0	0	0	3
2adfec9cf541be9ba05604a17ad3997a	0	0	0	0	64	0
2ae122250ef2269dcbefb39adcf47921	0	0	8	0	0	0
2ae50ae41a6755c531d9bf8a6a41d2e8	0	0	0	5	0	0
2ae5dacdb3f5b9b8cef0070f735f5063	0	11	0	0	0	0
2af9027196b54f3060e60ba03c6e9791	34	21	43	0	0	0
2afadecc3448c3f32a77113c457692b6	118	47	128	0	0	0
2b2bc629a01185d1b0a91b260c8fa16c	0	0	35	0	0	0
2b2ef93955a0e7fc9940b16759cf6c2a	0	8	6	0	0	0
2b2efe3e6a7b085032128fe8e4bcaa5d	2	0	0	0	0	0
2b2f98c71ce534805f8ecd7653a75315	0	37	73	0	0	0
2b394630c827ae71d41b746fcb6b9c38	0	0	0	0	0	186
2b3f2502d261c755e2f7f89bfb2e4985	0	22	0	0	0	0
2b458ef5afa0bdab98b8ad3a444f59d8	0	8	0	0	0	0
2b4bafd69213ab1585e3e728a573c5ae	0	34	0	0	0	0
2b4c5fa419d9fa8fe93cab79418abafb	0	6	0	0	0	0
2b4ca9a25ff534858b74082c2111f401	0	0	0	79	0	0
2b5e4d22466e4db870755d3c264a5e39	0	0	37	0	0	0
2b62709058976bb2595b3d1c70702c9e	78	0	0	0	0	0
2b64bc32ff843f6edd353beb57cdc939	0	0	0	0	254	0
2b7b5b3f7fc005ae8c623d6d61947eca	0	26	52	0	0	0
2b81becae3ffc2c1bf44f9a836b01839	0	0	32	0	0	0
2b83f09751c3c98a7cc875f1436c89ec	0	0	11	0	0	0
2bb6632ea1f359255a2f8a994ff2a6aa	6	0	0	0	0	0
2bc2af3bc0c6dd6d97ed9be534d455a7	0	0	10	0	0	0
2bd5df38315e5e03bf1baa551adb1e8f	0	15	0	0	0	0
2bd65e24b3e141a9d96324f7999e09bc	14	0	0	0	0	0
2be4a27ebe1ee5cb672faf2349887349	0	5	8	0	0	0
2be5f9f98737a004fe26d50f8c7517f2	0	0	6	0	0	0
2bea10969c01eb0805b4c353e7b33504	12	10	0	0	0	0
2bf1953fe24053ccb8d7e2e15bd50fa8	47	75	253	0	0	0
2bf9573b048d7ed745b79420e2da93bc	0	0	8	0	0	0
2bfc49379969ab7766c616ebfa56c845	0	20	6	0	0	0
2bfd1f6a936550618fecb9d677ec2890	0	0	7	0	0	0
2c09f5c5e2928eaae43b52d3d9ca8a6e	0	10	4	0	0	0
2c0d4d5d9a6fbbfeaedf4bdfa5c8853d	38	7	0	0	0	0
2c1a1be5c713c16bbd6492d1fbe2ce30	0	0	0	0	0	14
2c1c4d82d26fbba7b55e1539fb7c4161	32	40	51	0	0	0
2c1d39e551217a346eb6578d6d3e9787	0	0	14	0	0	0
2c310b2c73cc1a9539a15aa20dcb794c	36	0	41	0	0	0
2c3b8bca8d6f47005f6d472dd54349e5	0	0	0	0	0	49
2c4133a3a80ba1430f9d1125e864b74d	0	0	0	0	0	45
2c4ea7e9624613f3361b6601b903c454	24	24	0	0	0	0
2c5f2746ec53c37211f49a683753bb1a	45	60	0	0	0	0
2c64657659e4060932e24c5c2ff9e64c	0	11	0	0	0	0
2c69e0182b288d1e20c81518f3462ee0	0	0	5	0	0	0
2c6dc574d243607be89770a53199b9f8	0	150	0	0	0	0
2c7665231939ad69ba3eeac3aa3d44f6	0	4	0	0	0	0
2c79bedae2c275db891401b532f18644	206	30	334	0	0	0
2c86ed3e26cc8e69e95d8bb45e82c405	87	119	136	0	0	0
2c995e226192d7691a9aba9d107636e9	25	26	27	0	0	0
2ca751eac837278685e46c6f4b8fed35	0	0	0	0	0	41
2cbd6c219ebeaa7cc84eb740bf431b11	0	0	0	20	0	0
2cc2d3fe38463fd095527c5748788ba9	0	0	0	0	0	342
2cc411f5570f812bc7e1d4f40b91d36f	0	0	0	0	8	0
2cc444e06ff19e5c3f30d9e7810facb4	0	0	0	0	1170	0
2cd5446d936e8f8df1baedbd75bd992a	0	0	13	0	0	0
2ce00ab457fd285514bbb94269c1b257	0	20	24	0	0	0
2ce4b295bc9e64fd6e33b6b6f5be1fb4	156	81	123	0	0	0
2ced72bdc2a17f676ea3ca765adecb22	0	21	0	0	0	0
2cfeb206cde6107503e201249f98424b	7	0	0	0	0	0
2d048c0d3632eab0934b2f2022e48542	9	0	0	0	0	0
2d126bf137cc83e33ed55c320d1ff38f	0	0	0	0	0	326
2d16a3164ed26d49b7a06052fe6f781d	14	0	0	0	0	0
2d195c70ec26b61dd6067d222e710222	20	0	0	0	0	0
2d26bd02e84157ab2be7813b735bdd26	0	0	14	0	0	0
2d42cc0c56eca8e3b6ad4a3c9184fa3b	0	0	0	0	0	24
2d46c91743615feafc88ce7cbdb157ea	10	2	9	0	0	0
2d69165f79dcd581f3c221189c336fd3	0	6	0	0	0	0
2d6b94efd35283b591f54a2efb2a86a9	0	0	0	0	2	0
2d74401419c2f28e3db29bd0a217454c	66	0	47	0	0	0
2d894a64b249adfe4a0e824dd75bebbd	0	0	0	0	0	2
2d9b3a0adabb0ad001ab58bd2ee3a7ed	62	59	50	0	0	0
2da0eac4e888a5507297886a10b90eac	102	69	90	0	0	0
2da85d198fe83b94209218d625291a9b	0	0	0	0	0	326
2db5619722d6bc8d6f18cad4647b0a78	0	0	0	0	0	415
2db7e1dde91a2a28da0ddc82aac6b8d4	218	184	207	0	0	0
2dba007e1cd4cc537dc4be14976877d1	5	0	0	0	0	0
2dcca02147d2e67f7293b06718f6977c	0	0	0	8	0	0
2dcceacb718539af2082d2cb5c2184fd	0	5	0	0	0	0
2ddcbf497516f69507796b274d5b0fa6	0	7	0	0	0	0
2de45fd98b3c86ff7bf754fe0cd6e090	3	0	0	0	0	0
2ded9eb61073b28283cb5f01b3cb0181	19	8	0	0	0	0
2dee47ccab1027a0308d71b119d845de	33	0	18	0	0	0
2df4f7c4ce77ef91d818c956ad4b84e7	37	42	30	0	0	0
2df61fc511f20758feaa1be287edf619	0	6	0	0	0	0
2df9ec493b0a8c1cc65703c90ff84ca4	17	13	9	0	0	0
2e052114718afcb0b29db33c092fb68a	0	8	0	0	0	0
2e09e061ddfc6e65f907504839bf8139	37	26	15	0	0	0
2e16870d0d001d373017086eec9773be	15	0	0	0	0	0
2e1f9fa26d06943df24f289dfaf7dd1f	21	31	20	0	0	0
2e24c53f53461d7cc7e9579fc9080065	0	0	14	0	0	0
2e2504446a9186bd0cd57d681de225f9	0	23	0	0	0	0
2e27e7de69eaad53b20c7ed349fda3ca	13	16	10	0	0	0
2e34078153b8d9b14edc6de26c39b2ae	6	9	0	0	0	0
2e39c5413930208a16a2d993dbfd50fc	0	5	0	0	0	0
2e3f7c60014ed634b4dce7a5c6d77c47	136	92	97	0	0	0
2e42aca7c44fe1747a0f2bb08effaebd	0	0	8	0	0	0
2e4d4100db3081d85415b9ebfd8d0cae	17	0	0	0	0	0
2e5cfce4a785bfe7f001623782c6e815	0	13	0	0	0	0
2e5f6dda3158de13d07ec74702431732	0	5	0	0	0	0
2e5ff77456ea8b32ad073bfca976680b	0	0	16	0	0	0
2e60a2b63ef994fe9a9f8de5efe538c2	0	30	0	0	0	0
2e6546c17f11e9dc1f0db538f7dd9123	0	21	0	0	0	0
2e6553a486ad76fb074b34bb6689a7b7	29	0	0	0	0	0
2e6d037fcd15c68f0096c4fc21c35356	10	0	9	0	0	0
2e6f2e9dc0b693c7720150850c8d2829	0	9	0	0	0	0
2e79c17fff1464cda9bea5c68e2c6fd1	6	0	0	0	0	0
2e83f1ac744ac60f7ce93311343d68ee	0	0	11	0	0	0
2e862d9263deecabebf7fb294e226922	25	0	0	0	0	0
2e8db6fb41ff16f27a6f5e0089e95453	23	20	23	0	0	0
2e95fd11da45c34ee1cb0f946117cb48	0	10	0	0	0	0
2e9b8bbf8977090f8c6a6bef26459060	0	0	0	0	563	0
2e9cbd6da787aa4c2a46fecc37fbb6b0	0	3	0	0	0	0
2ea0e3555a048367fecd29213c7ee6bb	0	47	0	0	0	0
2eafc2a627b9ff470c41f79c78431f83	0	0	10	0	0	0
2eb0879c299ada5d6cba67bdbcef1188	0	0	19	0	0	0
2eb3b51de61e2bd68ee5bf8a209f8a61	12	28	0	0	0	0
2eb7bfc53d68f178677754fac5aed9cb	0	0	0	0	0	5
2ebde47e6c2c8d492e5ec324e1f1f030	0	0	24	0	0	0
2ebed740429fb932c1f1fe3ef7d1afa3	26	19	0	0	0	0
2ed4459d048e5a787ba315492f70a0e9	0	0	0	6	0	0
2ed56c5b75558d0d438f7fc7c1a32efb	0	6	0	0	0	0
2ed7bfa23e2d6358bfcc6717cd325f4b	44	0	0	0	0	0
2edbadc3829aa84ac6e9c2deaef66581	0	0	0	0	258	0
2ee00628ae3f20117f907013c79f2b18	7	0	0	0	0	0
2eeb940ed577dc833f4bbe049ee159a9	0	0	10	0	0	0
2ef28251b3f525bf803c4a65854cc644	7	0	0	0	0	0
2ef4544ba409a01d971e5b8fdfc95ed2	8	0	0	0	0	0
2f030c1f7397220ae45f868dc1dcaeef	0	7	0	0	0	0
2f04f5a46db6c44dc61b5b890a44f82e	25	0	24	0	0	0
2f09ce5ab4ef74bc9977610abac4587c	0	0	0	0	0	67
2f0ece805459a6e3bb372350766d3ff3	19	21	7	0	0	0
2f223b250dc26fbfa8de267ec927c2b6	0	10	0	0	0	0
2f290556963b507012188a1332e38e7c	33	0	47	0	0	0
2f2d4cbc7d18af2b08e7c4a0e35eb404	0	0	14	0	0	0
2f3ac525a20a5ad56779cb1d4f029201	51	0	55	0	0	0
2f3afcc5c64ba3948a103ffa38e303ac	0	0	0	0	10	0
2f408c9391b69ea39ac7622faa6f2c8d	712	181	224	0	0	0
2f438eb01f47e599398a60c074bd25b4	0	12	0	0	0	0
2f5ab88b32cebabab80ac40335feb20d	11	12	0	0	0	0
2f64dbf899de4845c04f00262b69aedd	11	0	0	0	0	0
2f76d4852e45bb05d2dfc20da4b12908	0	21	0	0	0	0
2f82387e2382a690bcb9b14cae4b0832	6	2	4	0	0	0
2f889a5b50dda3ab6ece87eb92b4470a	0	0	0	18	0	0
2f9b01f5023cffa1237f913f3ff8e7bc	0	3	0	0	0	0
2f9b9142b45b8973bec2c0540cae70c0	0	0	13	0	0	0
2fa07353d82d0d36b91e41bc3b240516	29	38	70	0	0	0
2fa75e1f8e651128bb4b21c81771181b	0	0	11	0	0	0
2fad65296d37378e10d56adbeb652920	0	0	0	0	34	0
2fbf603c0a6aa4a4d5bd88c7977b3e8c	7	0	0	0	0	0
2fc3a470029f7213361373e8b963844a	0	10	0	0	0	0
2fd320817d2d495d920e5c10ff1eb074	0	6	0	0	0	0
2fd4f1440a3b1882fd9d19a95f0c2b24	6	0	0	0	0	0
2fdf27de1a1694c914888677ee1f0b08	0	4	0	0	0	0
300251703e6bcc5ee503f4d322cb665a	0	0	0	0	0	2
300a07d0c807c5f0cc0e833ba1f7d9fe	0	0	11	0	0	0
30118fcddaa985b2f0447d9dab8ce874	24	0	20	0	0	0
301a5358a07b480bb8cb136c615f04ec	0	0	0	0	0	42
301b96c322893b95c6103dc17d68ea8b	0	0	0	0	0	52
302596d55b9962b7e3da32c1275918a8	21	0	0	0	0	0
302918d84371e96570f713601da1b023	5	0	0	0	0	0
3036c1d3e9de2e586651dd14ef1dd258	0	0	4	0	0	0
30406054e178cd9846048e27916bb5d9	0	12	20	0	0	0
30426ede27f15c7501a52c24bcebd1db	0	11	0	0	0	0
3056dc1a57718e42ab75218d3e7fc983	4	0	9	0	0	0
305c297f19726317840207d207c3a011	0	0	0	6	0	0
30602c76b8a2a959949f610b54d71d33	20	0	7	0	0	0
30633a21fc9f54956cac2a72e64d718b	0	0	18	0	0	0
3070175261b0ccec8eb2b6480549a3b3	0	11	0	0	0	0
3071e185b4ff3b5d01cdc7f0b8bb16ce	0	0	0	0	250	0
307343ea26be8f84f92aa36948a81d17	48	0	11	0	0	0
3075eb352caa5886d542603fb6c0c7bb	23	0	0	0	0	0
308ef02ccc5dc71986759531b6f4b6ed	0	9	0	0	0	0
30907231438cda380cbac09516004cba	0	165	60	0	0	0
309482ace810400c77e793f1bed12aa5	0	0	0	0	0	132
309b771e0146d2a53c265c44987f3dc6	0	0	0	82	0	0
30a0560ead42839c04a040e5c1264a25	0	7	8	0	0	0
30a1d08623220af04096cff402151451	0	0	0	0	8	0
30af8a9a8ad5fba0e3f76c30c1e8845e	15	0	0	0	0	0
30bad39864aa6a698846b310c5b62b24	20	17	20	0	0	0
30c016f221f3e744c220cf51b493bc3d	0	0	0	0	44	0
30c1074897999ed3b841958bb4748d8a	0	0	0	316	0	0
30c91f8eab76458ddab4daa382fd7ba0	38	29	38	0	0	0
30c94fb14042274741177c6ec3e72f1f	11	0	0	0	0	0
30d26d5567d8b02e1b59e0054ae2509f	7	0	0	0	0	0
30dae051ab7489097fd51225328ac447	0	0	12	0	0	0
30eb42f0810e7d8901f4c84d3f972dcf	0	0	0	0	0	215
30f49c8a6dc465f9c97c3782ab4beb25	0	9	0	0	0	0
30f9f618b7b94496a0932fd509f72a79	0	5	0	0	0	0
3119bf00e96ec70d32a06611ad16c0dd	0	0	18	0	0	0
312810a7b8ef46d3938c762724bd6f9a	0	5	0	0	0	0
3129e2ce51c589bf72fb596ab9b07204	16	0	0	0	0	0
312c2ff1534e2a7f9a36868c30a0892c	0	0	0	0	260	0
315735c59274d18dcb2bfde34d9fcd3e	0	12	12	0	0	0
315ed5064d4dd426cf96a1298ef03554	0	0	0	0	0	74
315fcee79008c5f35f6429cd84b79235	0	22	26	0	0	0
316fae05072d7e2d1a8cbacf40e1c782	0	0	0	0	137	0
318af5fdee76265b1d4eaa04540b2a23	0	0	0	8	0	0
318bab4c7456ee7715aab8ee86dc4b5e	0	46	0	0	0	0
31a30e6441417932588ba5ce072e9566	20	30	26	0	0	0
31a94fc43f54730a8c572029cc38dafc	0	0	0	24	0	0
31af3746bca40c832da0aeb8a9a987d8	25	0	32	0	0	0
31b06b86c3db30238fa8e25b17e98fa7	0	0	35	0	0	0
31bbdba635b6d593a4308477c0186ca0	0	0	0	0	0	47
31bc6b57bdfaa13d8959bfcfde363515	84	139	293	0	0	0
31c59def459d425c200bbbca26406e62	46	0	0	0	0	0
31d36ec06cc8781ecc3eeb773a2d7cb2	0	7	0	0	0	0
31d45ad779fad33646c50687ca4cbfd8	0	0	0	173	0	0
31f983415cc353cab7e5c1588d1fbe78	0	0	2	0	0	0
3209e5d343060c79e7788488ab0180b8	28	0	0	0	0	0
320e394710e8aba840348b8c2c3cd8ce	0	0	3	0	0	0
321075cc97e7eb22da3fe349f1c8f1c7	0	7	0	0	0	0
32275ce2d1950810c920f330ad7bd4c5	0	0	0	13	0	0
3235eedc6dc902f61543b1785aaac28c	12	13	0	0	0	0
3236109747d6ba4bb1270494d4a0ad09	0	6	0	0	0	0
324ad114ba71c14db92aea24c3ee6d44	8	15	0	0	0	0
324d75644ee8be4b4eeeba194b71e16e	0	0	0	0	2	0
325037295bcf3eb37128f506a37b677b	0	0	0	0	30	0
32523577f07c72d2a7bcb2f91008de41	8	6	0	0	0	0
325260445e9765027e7d5a608ec2aeb1	0	0	0	0	0	10
3258642fdc48f8bd6de4758cad9b4282	13	0	0	0	0	0
325c36810d0b0d5c2e59e567c0f83eff	0	0	27	0	0	0
32717c24f04a8b779bb1cd344ca3abb1	11	0	0	0	0	0
3272b5d7672fceaf5b7de4288af347a2	0	0	8	0	0	0
327e9ab0326696119b51e34097267459	0	0	0	0	0	2
32ad00db5700d0a04654a84eed1b4c76	55	43	157	0	0	0
32c9d0c7ebcf76df8c845ccd6c9d64bc	17	0	0	0	0	0
32db669cdf5162ce34242ff085c70370	0	5	0	0	0	0
32ebf177eff23f1cd7f2bb6ea2aded74	0	29	0	0	0	0
32f030c5a922557d5646e6960eb88bd4	27	21	37	0	0	0
32f05db0980780a574be2f386ad88e3a	0	0	2	0	0	0
330219837aa6ef503fa87f84c66a0f0e	0	0	0	0	15	0
33102b14c57b048add86bb19f8342658	24	37	0	0	0	0
331dd371241d331648779b99c0f349de	0	48	0	0	0	0
33245b07b09ebad41df8816010fa0fb5	0	13	0	0	0	0
332bb885ece23eeb50ae6ec6a9ec6043	0	0	0	0	34	0
33304a72c478d91433a3521f79ddcbab	9	0	0	0	0	0
3338a55ab18bbaab912d2f9b6190a830	0	0	0	0	291	0
3344174dd60edff6cc43f9d488b39e4e	0	0	3	0	0	0
335eabaa7349967d13272e396b5e240f	0	0	7	0	0	0
3369f2157e885e5e74cb2cca91e38f1b	0	0	0	22	0	0
3371ddaff3f8acdd2a400b15621f807f	0	84	36	0	0	0
3375c9be7b5f4eeccc7625c960fc218c	0	0	0	0	0	62
337c6f725980832573a0e569e3707aa1	0	0	0	0	0	733
33811dbc18eb1d26f325d2250a7d0100	16	21	0	0	0	0
338fbf994793c9ffb9e051cbc587fb50	0	0	10	0	0	0
3393daacf3b13a0d6111c5a7fa37cc61	0	3	0	0	0	0
339a6de6073ee902ffe24abb83145a01	13	24	0	0	0	0
339f8a16ccfd24edb981b5c8cd3e1c0d	0	0	37	0	0	0
33a86dc0059fd094490e6535dde15cd8	40	25	28	0	0	0
33b14cb547862a9232e6f41c2230ea4a	22	0	0	0	0	0
33b9a199f4f18c8faca85e7a7eec20a9	0	0	0	0	0	15
33c98bbb977db3efda9fe70092003305	0	22	0	0	0	0
33d5ab7c5f3b6fc6a30f14bb946886b8	0	0	0	0	83	0
33ec8720f52fbc55c4c6d0fe339151f7	0	2	0	0	0	0
33ff896685a278688a913a8a3ade6274	0	0	13	0	0	0
33fffaefc2076fe837401e03c0899d02	0	0	10	0	0	0
340db3b3da3163fe590f463962facae4	0	0	0	53	0	0
340eb87401dd7bc7637469ea88c06d2a	4	0	0	0	0	0
34143a4d7cdaa7874623ffdb1bcd7d6c	0	22	0	0	0	0
34151dee44db0b837453efe48ee5e117	0	0	0	430	0	0
341c75ae17e6cf6bfa16bc9d30e31c95	0	0	0	8	0	0
3432f24965f4bf0226831f16a0ee94ce	27	0	0	0	0	0
34362a224b168fa5d938e5a2b75b70d6	0	0	2	0	0	0
343ad213d27eb956edc1b1d48e0b6c1d	16	0	0	0	0	0
3455756276eaefb77cb9d6f20ea6c728	0	11	0	0	0	0
3459b61a023b6fc11771715a0dd3f0da	0	3	0	0	0	0
345a83d19f364775258e9ba55335b108	11	0	7	0	0	0
3463310295a5040e115a30cbcfde3134	0	0	0	0	0	141
346b164d60cde53e0c9855d42cbd4311	0	48	0	0	0	0
346fc460dcf31393c245067c1f8f68bd	0	20	0	0	0	0
34707c97c0133b85eba27213e4d3fe2d	0	8	0	0	0	0
3471366d6940d1649a7142fdebb877c4	0	19	0	0	0	0
347461b88bb7226ce556d6d8765a8f30	0	0	13	0	0	0
348b56b0d417c44961fa519a960db772	0	6	0	0	0	0
349f981d145149e51aa6b551cda350a8	0	0	0	0	0	8
34af0880ed44bc80b76287cfbdf45f9c	16	24	0	0	0	0
34b32933f7ccf504f3d591952229610c	0	7	0	0	0	0
34c762a915d2370e0686766759760071	0	12	16	0	0	0
34ce46d6a60eb6d076b6282c950d60e5	0	0	0	0	46	0
34eb9d88cba32194eb44592c258ef590	12	0	0	0	0	0
34fa71b8f18e9ddfe20349c8c348acc5	0	0	9	0	0	0
3508e3c215d5e5936d071ba7cf70218e	0	0	0	0	7	0
3512078d47e71d2ac81c36053c347a34	6	0	0	0	0	0
3514dae107783d99cf02a9e28bc688fd	0	6	0	0	0	0
35170af0955105a29dec218422d98ca3	27	0	0	0	0	0
35177b06e5fe4d27a45176fea5a9f39b	0	8	0	0	0	0
35306f6ed8357e842b16f7c488962783	14	0	15	0	0	0
3540c42624ae13e7019646a536c66f1f	22	0	22	0	0	0
3544ad98aa0abdf9e999cf97f6e2227f	32	0	0	0	0	0
354e7a0be0057ec0676eb563d389d2bd	0	11	0	0	0	0
355c3240c6a55a96ef70dd3701c96392	0	63	149	0	0	0
355cdccf320e7337fd6783cbf07bb4b7	0	11	0	0	0	0
355e16aa720c15b6d32fbff5a1490855	0	10	0	0	0	0
3568bfe4bfcbca4e45034ac6452b203c	3	0	0	0	0	0
357300dd2f1ef3f3b2d1a19cb11dd7d7	0	0	0	0	0	10
357a0ae2e8f75debcbaa6e2c6051a59d	0	0	0	0	0	22
357a856ed778e09d28601194c8c04a34	16	0	0	0	0	0
357fc3d6971bac5e8bd86777709be85f	8	0	0	0	0	0
3584805f75e371d263fbd0301f9663db	2	0	0	0	0	0
35960674cc310ba64b1fc451b4b05db9	0	6	0	0	0	0
359bd46c96746c7175b3bab21df74a53	11	0	0	0	0	0
35b02bf1210d1555b77db5fe81d1fd97	6	8	35	0	0	0
35b76507c3df3aa676abad92dcb33357	0	0	0	0	0	596
35c28d681f49e03cdbdc5ff71d853aeb	13	12	11	0	0	0
35d2bbe9143c82fc7da5aee8e10c7dba	0	0	0	87	0	0
35e7ff11a0c20c212f89c8b4ea018eed	0	0	14	0	0	0
35fd864f2321418b66de4c55655a3d84	28	12	0	0	0	0
35fd899186a76ff40ba6e6496e5d6934	34	19	0	0	0	0
363835d56013d2ecc6dfabcdaf65f191	0	0	0	0	21	0
36450b1c63eb479f0fa11b46537dac99	71	60	81	0	0	0
36527e10f01d19b733198a95574cc2e6	0	23	0	0	0	0
36551b8575594a64106a25b11755bd1e	25	0	24	0	0	0
3658b525dc4bf48677d635b299222d05	0	24	40	0	0	0
3664cef737f85b9c6ca011f048d273ad	0	16	0	0	0	0
3665e100d5d8cead4b933a2ceb3b1bbc	15	17	0	0	0	0
36795d2fe40973a0821aa86f203d9f1a	0	0	17	0	0	0
368a4fb93cc88e2ed88623deaa5b46b8	22	15	82	0	0	0
369474d3ef53f6d115805dd43c44d69c	0	0	0	0	420	0
369c0c60176c2ab02aac8c1eddb59397	0	29	72	0	0	0
36a380609178abfd7fa3852d2ad73e0d	0	0	33	0	0	0
36ab18b49f6022e7f9eeb60242d89c38	0	0	2	0	0	0
36ab4e0df0473a55080d043981dd4f11	2	0	0	0	0	0
36ad6dfc4700b8e602ddee5c3d99bbf3	0	12	0	0	0	0
36b497e121ecfc2ecf27ae1fe9a99240	0	0	0	0	12	0
36be3f8c649cd0a71369379200294240	0	10	0	0	0	0
36bfcf27f21ad6fd92c1c9e441ed2232	0	0	0	2	0	0
36c45d09073646b0503b228f11eda9cc	58	97	126	0	0	0
36cc3d58affec3b0e170c2259bdcbb2b	0	0	9	0	0	0
36cc54a7326252a853c818ecfc88f57b	19	23	0	0	0	0
36d349c9b392105efe224ead74484f75	32	32	33	0	0	0
36d79f6335369163830c6b4d28cbc719	0	9	0	0	0	0
36e11428846f764d9a8d11aa6e6a2165	0	0	0	26	0	0
36ecd01eb4eb9ebb7a11ef2010a63a06	0	0	0	0	0	14
36f114d6cbfbaf1c08e48ec086d13e92	0	7	0	0	0	0
36f93ec606aafe9243a5ad70c7542957	0	3	3	0	0	0
36faca38e62a8e280ac588a2bd4c1eaf	0	0	14	0	0	0
36fe7033c1a8817e631c7ec803ce8835	0	0	11	0	0	0
370ffae682e3c9f39bc987d56dff8e22	0	0	0	0	183	0
3713942a724d1cc84fbadd0b10da9288	0	0	0	0	0	70
372986edf99fa62f49d305ef039b2854	23	21	19	0	0	0
373b06d3dff05834b37741a6dfe1fa0e	0	34	0	0	0	0
374112b90cbf7b9164e4ffdf0aebf441	0	0	0	0	358	0
3742d07b795d5432fa6370f765e3354c	0	0	32	0	0	0
37449850da4e8142f75dc350d58f2cea	0	7	0	0	0	0
374ac33a2c328eac7f4df375a8172b06	0	2	0	0	0	0
375058c5e95a6699cf521445e258df68	0	2	0	0	0	0
375920150f0d8b4a0f763f669c394126	0	0	35	0	0	0
3759dbccd8fe0404c6d1570004f5a3c0	0	0	0	0	0	14
375d2537601accd3c59a7a49cd11add2	0	37	0	0	0	0
376d4c37b77e1fa9644dd7905e81ef76	0	10	0	0	0	0
377058db3a900a8430d294fde58338ad	0	8	0	0	0	0
3772719810604754597d972df8188e0c	0	0	37	0	0	0
377e1aed3602263bcafef1aeff8a25ca	0	0	0	0	0	116
378c4d507c9a83ef4788a80b9a178774	0	16	0	0	0	0
378c7d60af768ba8725c977b23db1b0b	0	0	0	0	0	10
378f1e322578b2d4ae4ebf9ae50b2705	0	0	0	143	0	0
37a2f5f7a1190876061a017a6951da53	0	16	0	0	0	0
37a951ba6eb52974bc55e5ae0b106297	28	0	18	0	0	0
37a95dec85453af8a40c895b06e6c0ff	0	100	21	0	0	0
37af0bfc28d240f4ff03a6e23ff7881d	0	0	9	0	0	0
37b60d9893b47fe5d64caf61febdb54a	0	0	0	0	6	0
37c0e11579ebc5e0382c1aa8fa71c614	22	23	47	0	0	0
37dfb938a09ee32ee76058fcd3698b54	66	0	0	0	0	0
37e13841a884d289ce3899ed912ee370	17	31	0	0	0	0
37f059e28a63f848e531287c3209897f	0	0	4	0	0	0
3818fd6287cc14aef97fa4c01869ff69	0	2	0	0	0	0
381c489f292dddca99862543b843d897	0	0	26	0	0	0
381d4cf06e55d05f3d70bae355d5ba06	0	0	6	0	0	0
3836559198557fba9f80821bf6959068	0	0	3	0	0	0
383a81ff12565e7ac2f87d1e8de64626	0	0	0	13	0	0
383ccb338eebaeb92dfc487712d92d9c	0	0	17	0	0	0
38437630e9c335c3f762f27aa838732b	0	0	0	0	4	0
384a2032855ccaec2ac011c688097ef5	93	101	101	0	0	0
384c502b51ecea52f1322d2ec4a45888	0	39	0	0	0	0
3851044da487a0d3717ba34689e2d98e	18	0	30	0	0	0
38576d73b4d4cc401ed1f5a4ec1eaca2	0	0	10	0	0	0
3858d59d30c3ec14901aced998fb20e3	0	18	0	0	0	0
388b75510ba2f4d341de8e4c30bde392	19	7	0	0	0	0
388bdbf1521db60d39ac1a67255d8b18	0	0	11	0	0	0
388bf375605439d61c50229649357a7a	6	0	0	0	0	0
3890fa4b2e1f6c4c86d5c1d2fe82ad80	14	11	17	0	0	0
3892c0da647bba6c1e0150df7f68305a	9	0	0	0	0	0
3893821e7e89ba73a80c977f0ef73461	105	102	88	0	0	0
389973c9ce398d9422418be79a6b0fec	0	34	0	0	0	0
3899779c37932a5ef050e5c2536a9e17	0	0	18	0	0	0
389a17ed7de1769927ab4ab9df368c96	0	0	0	0	0	9
389d7bab71488f84b8ed68a606f29357	0	0	0	0	13	0
38a3ff23c6122f2263d1118f0a3ac21c	0	0	6	0	0	0
38ad8e6663813118bc218cc691854cf4	0	14	0	0	0	0
38b159a01ce0d0c7553ad53381ac7763	0	9	17	0	0	0
38b7a7f0f6cd4699dccda779f6b61931	0	0	27	0	0	0
38c324584881980f1251290f21cf8370	4	0	0	0	0	0
38de60712fec24c0eb4d3b01c59bcbd4	10	0	0	0	0	0
38e34024d5a9eadb4fe42b1a809f2ce9	20	6	14	0	0	0
38ea6b4f67eb7e83aa989bd5cfdbaab7	165	128	250	0	0	0
38f2f26ee538c91b5c699a8caeaa7af2	21	12	48	0	0	0
38fec0204632aee4e05157fe4958551f	0	0	0	0	411	0
390b556f4ee15cee081a788a5e6db0a3	30	53	56	0	0	0
390c9881a2cb0f8b597b15c8030a269e	40	0	0	0	0	0
390fc39e1f31f02aa987e6106ee10d4d	50	0	0	0	0	0
391fa2936c6775b931328cae13495eac	0	14	0	0	0	0
392dc75358bb0719ce84959f6f225634	0	2	0	0	0	0
3937f3ccc4c20378ae3b415180255352	12	12	0	0	0	0
393fb3ddaff1d74b84ee6b673dd63259	13	0	11	0	0	0
3940a038bbcd27e48c0431da8933e469	0	0	0	0	0	108
3941ea716c350c9423e8c06df87014a0	0	0	0	0	0	58
394d792560cbaa02a91cd0606e38a4f8	0	0	11	0	0	0
394ed539689d227d741334942cebe0a4	0	0	6	0	0	0
395a9260464a36eeda40d313a04662e0	0	0	0	0	138	0
395befd88d22c2b49cf5991c271fa1a5	96	0	60	0	0	0
3978c5fef995377790f2bfb5ecb3d9f4	203	68	169	0	0	0
3985355ff24a3af26c06a2990bc7ad38	76	26	30	0	0	0
398fc41498baa3bfd3544f6cdf731e55	41	36	27	0	0	0
39906c3cb0b9b6868706a6cc5943221d	12	0	0	0	0	0
39939da16ec107cfcd200ad6d72cf41e	0	0	0	0	0	2
3994645720c3b126ccb675a199fdd3c3	1	0	0	0	0	0
39981015e2118f8d1a27557cc43d3a5e	115	72	76	0	0	0
39a17688a420ba1ba01c85688302e79c	0	0	22	0	0	0
39a9cb61e189411031c919b62546392a	0	0	0	68	0	0
39bf2cb190cdac0076ae067531306e8c	0	0	0	0	0	22
39c5ca5237c4a5a74d0f40042e2ee93d	103	76	77	0	0	0
39cc656e044263e25fe5d07451ee70c3	0	8	0	0	0	0
39cf5a3dd674787ee7a9733f08d16c3e	0	5	0	0	0	0
39d05106431a065127607d8f68d6e461	0	0	0	0	11	0
39e08865fcef875f7184ea9074fb27f8	6	5	0	0	0	0
39e4d4dfdd2c2d221bf2bf04ae87b9e6	0	17	0	0	0	0
39e8f92f9d2f31e30e17b766e6c84093	0	12	0	0	0	0
39ea1d44040fe41a692e1ea272e6f7e5	0	9	0	0	0	0
39eec7b9924d0744237b30cc28ed2039	32	52	0	0	0	0
39eff424c8b7e69bf6d88433955fd0e5	0	0	0	21	0	0
3a0ce534cb2a52e460bfa238c630d89d	2	0	0	0	0	0
3a15a15001cf1c2e4421525ea2a7fa31	0	0	0	9	0	0
3a21cf3db97957ae0f7f6f535b61570e	9	6	7	0	0	0
3a27966a78de27868cca6edfe2cfa425	18	28	18	0	0	0
3a3ade53b2dde4af865087e84df0005f	0	0	0	0	3	0
3a425cc9b5612bf5c391bb59ff773b3d	0	10	0	0	0	0
3a426ec52f468687f25d18f4a6ea4425	20	20	13	0	0	0
3a9a7a83d7c08a717fe652745825c6e9	0	0	10	0	0	0
3aaa924fecd2a6ecab1f530b5a43953e	0	25	0	0	0	0
3aade0dc97382f6374015d7ddada1a6e	0	142	57	0	0	0
3ab8cb05e0812716f7b56282479af2ac	0	0	15	0	0	0
3abe45f30622475fcf6fceb09181229f	16	0	0	0	0	0
3abf6e1d817f9a9545101492a4d6e376	0	3	0	0	0	0
3ad422526709c27795390a31c67b8580	0	0	0	0	0	11
3ad49a74a6013ba71357051a67debf79	48	49	42	0	0	0
3ad5d1dec0199ae2e5728a2e5d6f5690	0	0	8	0	0	0
3adbe2097112ba96dc6ee2f2de3a65bf	12	16	22	0	0	0
3ae88dd9bbb8d47b4e2657d74ec1e60f	0	0	0	0	23	0
3ae95741f62d508f7a1e7eb75bbdd1b8	9	0	0	0	0	0
3af5aa49459d0455ddc212da489adbec	24	22	23	0	0	0
3afd06ec17ab3b8a218c502393b01d47	0	0	8	0	0	0
3affd48cc806f3622d8157e9d0479257	0	0	0	0	0	66
3affef6793643e8510f812be220b7d2f	13	12	17	0	0	0
3b099432ff0ad0d4ade7ff128d38b602	30	0	0	0	0	0
3b0a695285d6fe5701646c11484cca62	0	53	0	0	0	0
3b1863e3ba98cc4cdc40e06263b530e4	0	18	13	0	0	0
3b1e18a248cce7aced6d113611796144	0	0	4	0	0	0
3b1f8365008e7319d51e97f3d9f20775	0	0	16	0	0	0
3b20ca5ec488029489427f0d79d410a6	0	45	0	0	0	0
3b21281872f4bb0b008152b86593d7be	27	0	11	0	0	0
3b2c65e0d641e52a4e9255fa702ba164	0	0	9	0	0	0
3b32de41bc4fa4237e2123000302a847	0	0	0	0	27	0
3b33380c57227a4955a0aba55042e1dc	0	0	13	0	0	0
3b34e861426755108f8a3dc9fb208898	0	0	8	0	0	0
3b35a689f7cbad9809982e8c9e57560a	12	0	6	0	0	0
3b54014d64d6afd7b5811927c15575f3	0	0	0	0	30	0
3b5b090d6982e6aa2445f7208c83cf32	94	60	110	0	0	0
3b5f93cc8d338cf1d7906e78a0cfd8f4	0	61	0	0	0	0
3b75915ec8544448d1d1d2f98bad7a2a	0	0	0	0	44	0
3b7d228f8a16dcf684fa20f366cc5329	0	0	8	0	0	0
3b7e1ee24f11c7333803d097cfc784a0	0	0	0	0	118	0
3b7e84e9ff06106fb347916e3aa16a8b	0	9	0	0	0	0
3b8e4484f221814ae9763d9fd2b75db5	0	0	0	0	15	0
3b95e1dd2909a3335e1d8c39430fb43a	0	0	4	0	0	0
3b99a6c5893635bbed318d9e20a14e62	12	0	0	0	0	0
3ba9901249702f1f1289c4bfac972cbe	0	0	30	0	0	0
3bade236451c0925a3af2558e558e573	0	8	0	0	0	0
3bae2b80c57c127d8d886cca348633a2	0	15	0	0	0	0
3bcbb88e59e07304a265ca58a01e9a48	20	0	10	0	0	0
3bd0a36cec1af810e4db2d39ad89354f	7	0	0	0	0	0
3be11cf28e46719730c6394f72284b73	0	0	15	0	0	0
3be312edc2ed1d9157b148e21c0ff68b	14	0	0	0	0	0
3be40fbcd71f073553dbcc11523e6e21	0	22	43	0	0	0
3beb03f50c46e69ff1933272f9df078b	0	0	0	0	7	0
3bf1d9d8a382d370eee6b77d41e1ccee	49	33	0	0	0	0
3bf635ef12c7eff00a0654a84b7416a3	29	0	0	0	0	0
3bf6a38c0e70f643271db84ddff2d6b8	21	12	0	0	0	0
3c01fb6b5caf71fce85ce4226b8342f2	0	0	0	57	0	0
3c0227858dd2e6cc115b0a5a16ae78e9	17	0	0	0	0	0
3c063b71bead9f5a4ef4f131467dd424	0	17	0	0	0	0
3c172e8d3d7d878e65f8dab5317b87bd	0	4	0	0	0	0
3c1ea9842554ffd2b2da9885a8b72999	20	18	12	0	0	0
3c2212d7d2709f23d38350c5dcd49047	0	0	0	0	0	4
3c221415d50e4e934cfcc5125f3c7771	0	26	39	0	0	0
3c2db807c08f24559783fcec7d360fa3	0	10	0	0	0	0
3c366e2c280accd048e491fd3136c708	21	19	19	0	0	0
3c3dcd447c73930df342b2b0c877874c	0	0	13	0	0	0
3c5c9d97fe4d8730f8ef7e2172d54393	4	0	0	0	0	0
3c6a3fa0988812dd4f19a63ca59e9fb5	0	0	0	12	0	0
3c72d83636b467c1fdd1b39bb6a1582d	0	26	0	0	0	0
3c78605ff2c52d1834605b6323b0abea	13	0	0	0	0	0
3c7fe15658bf2b8a1c9aaf2ae3244df5	0	4	0	0	0	0
3c8136f43c64141b425b01f3a9f870ba	0	78	0	0	0	0
3c81cefa1fe9b234875280f6e931807b	22	0	0	0	0	0
3c9907edcd2b4675f1840bef29e31e77	7	0	0	0	0	0
3c9ac7a998df270e54d9f58edbbdd9d5	52	19	32	0	0	0
3c9b8380ee6f5e34991f86a86bbea33b	21	0	0	0	0	0
3cadaa128da4141fd3187b73912f1a1f	0	0	0	0	866	0
3cb89554e4e79f686376fac8077d0dea	70	28	12	0	0	0
3cc0713b89f7e28f50ed80374fd86e77	0	0	0	0	0	9
3cd94f730bbae11c48fa1ad98b1a9dd8	8	0	12	0	0	0
3cdbeff593f9ffa1fd75b9c25cdd2fc8	0	7	0	0	0	0
3cdecee599b9d63495439ce72b1a2d41	5	0	0	0	0	0
3cdf1fae30c1f60fcba4a6bf1b567ddf	32	4	23	0	0	0
3ce44fe7883f08af46d6ea0112d76cc4	2	0	0	0	0	0
3ce6c29aa096eeb16720e0742b4ad355	50	50	0	0	0	0
3cf69425d6e2c1296e68bd925ea47512	0	0	0	0	0	12
3cf948f4dfbaa73be46a09b5df1205a3	41	41	44	0	0	0
3d05506a7ba32cdc16713da1541153f5	17	7	0	0	0	0
3d0a443b28cb55ee49afc9943974489a	102	102	438	0	0	0
3d10f112a2ca1dae57873fae9d592ca0	0	0	14	0	0	0
3d125bd1cbedcf3a14794c2be3cb062d	0	0	0	154	0	0
3d17aae58ce8c4a8db5ce8e8ce2b7cf7	0	0	0	0	825	0
3d233b6d8ab155bceb481980c9b2694a	0	0	0	0	4	0
3d275c87b3fb705d7c7f0c76b23f44a2	0	0	0	0	0	5
3d287e30a13555cb4d34bc3d67ac4709	0	0	0	0	4	0
3d2fdcdfb8e4a65cc23df09b47034eb2	0	0	0	0	29	0
3d3cb49642e1be3c17d04a6ee66e22cf	0	11	0	0	0	0
3d421bf4fc79db7a2f95e49f657d29aa	33	0	34	0	0	0
3d602d30c3c47019372f61b2765195f9	0	27	0	0	0	0
3d625f6bbfdea159131c13adbb4a9a73	0	52	36	0	0	0
3d68128159fe25cf9f0eb02d29d20936	25	0	0	0	0	0
3d79c38e0d6a279e9d29a646db8e5bd2	0	9	0	0	0	0
3d7f01a8b6f5575b646e981725c5e500	0	7	0	0	0	0
3d806d93df82169e96778ae62fca8188	0	0	0	0	8	0
3d8098e1068fc9161d3e7cf9732a40d5	0	9	0	0	0	0
3d9686e6b8abd722b506d944442d2263	24	19	23	0	0	0
3dab75eee47f1e4ce7bab1a7ff0bd9d8	15	0	0	0	0	0
3dae200d037f3f185aa1488b85b3b51e	0	0	0	0	0	7
3daf255a3c2f3a6d5430a109dc971e06	0	0	14	0	0	0
3db214a285bc76f9d83f08628525e079	0	0	8	0	0	0
3dc22738da496675ede450e50e118812	79	76	84	0	0	0
3dec19e9dc3138f4de596ec9e31818f9	0	0	6	0	0	0
3df5052e24a76074af92f868f8b6de5c	0	0	9	0	0	0
3dfc711450424d7a41a2c5f5a773d995	15	15	0	0	0	0
3e02b722ae1226b10567899dc4774676	23	0	0	0	0	0
3e0bc49f15e2b3b9e5ed7f3b773e1cdb	24	29	0	0	0	0
3e15ef49c97b63839ff9fd83b3525693	14	16	8	0	0	0
3e17f47112af45e231622392ec4c96bb	188	39	21	0	0	0
3e1b265b67fb7cd5c8051d7b7da02b05	41	34	34	0	0	0
3e3551fdb1d0737d832da4e7f882e3ed	0	306	80	0	0	0
3e46308258369eacc74a208a57039044	0	0	0	0	0	88
3e5032cf49a70f55af9438ea3ad6829c	0	18	0	0	0	0
3e5a3063e1b6e8c4cb8b62cdd900a4c8	0	0	0	0	0	169
3e645587a617c1301b36f9ea65d5ff21	0	12	0	0	0	0
3e6586758599440b9c7d21c421c6d467	0	20	44	0	0	0
3e674f377080c713dac267991b13cada	0	0	0	0	0	2
3e73ae91760760be3ac4931bb24bb087	19	0	0	0	0	0
3e7d95c7ec7d581de319e4d26e35b113	0	0	0	35	0	0
3e7deaee9cd034fcc31ae8d78d60fb97	36	46	59	0	0	0
3e7eb7ba98e4aa8d634546bcb99597e3	0	0	0	0	0	101
3e8ad36c6146551641e0e11783a5ba3d	0	16	0	0	0	0
3e90692a5bfbf891dd3a87f4f15e102c	0	0	0	0	3	0
3e9f14d15cf0912ba6b505b1f6560a2e	0	11	0	0	0	0
3eb58b7fe1a037f761635268b00446e5	60	38	0	0	0	0
3eb93ecbd6b4bbdcf4f774c4b11c3441	0	0	0	41	0	0
3ebff35ba764574ff3566d350f5e9a12	0	0	0	0	0	285
3ec53e9966396b0f1ed0f152eeec6dfd	12	14	0	0	0	0
3ec67130fb2db5ed0536f24cc3001142	0	0	0	0	2	0
3ec723c99e744824cd9e2a91127b70e3	8	0	7	0	0	0
3ed177c381ec0ce736035926f571d186	0	2	0	0	0	0
3ed49903611f8c725e369b89c3b166d9	0	22	25	0	0	0
3ed720e42386a84b6d3e02883f210bb5	0	28	0	0	0	0
3ed7a33e39a7f5cb9881390cea5f53be	15	0	11	0	0	0
3edd9581c7efe8d8a93fd77175064bc3	0	0	0	23	0	0
3ee4bb9a14fc8992f231968dc31332ca	0	6	0	0	0	0
3eeaea69f8c5ba152ac1ea05f13fc9a5	0	0	0	61	0	0
3eeb82ece55701180db90b01d2afb65d	0	21	21	0	0	0
3f02c822f3f4328ea5d9dcbea02f50f3	43	42	21	0	0	0
3f069d39b90563e913b72008676490f1	11	0	0	0	0	0
3f0999fffbe86ca2023e3f474787d073	0	13	0	0	0	0
3f0d4a3621486cd6f48632fa2164329a	0	32	0	0	0	0
3f143b5af864248ba90e74d7f87c3e4e	14	0	0	0	0	0
3f151c522263d5d3e1b60715879f6255	0	0	0	164	0	0
3f22fff2cb377f54b6380e7330f7b66d	71	68	71	0	0	0
3f25aa18dd4aa7adcc41cc75796f87b6	0	13	0	0	0	0
3f321c7ac920fd1e8c48ee19dc55d266	0	28	0	0	0	0
3f34738c1c8666a2ae2466ae7c2d50f5	0	0	2	0	0	0
3f38a4382024f3bc411687906539ed54	17	41	0	0	0	0
3f4fe4301b96a598fbfa63ca5d6f6a82	0	0	0	13	0	0
3f556b333299cf2c2e4089a68e3f06e4	0	0	7	0	0	0
3f6662be1271a09bca04cf22d5692799	0	0	0	163	0	0
3f7ee0602c9e1ac7e86c386625fe467c	10	17	13	0	0	0
3f84959deb7eacc1a3940619f1fa8ff6	0	0	15	0	0	0
3f8ae00d7c52033f9bef7be212c0cc5d	0	0	0	682	401	0
3f9ee9948551684b85025b46b85c9b27	5	0	0	0	0	0
3fb4deb5ada6ed674a5330651f1f332c	27	18	11	0	0	0
3fc3949c371f99653e5cd2ec2c6c09e3	59	33	0	0	0	0
3fcb9e31091d4737dd4d7689ba160764	0	0	16	0	0	0
3fd2a6e12819719e8e97362978d86965	25	18	14	0	0	0
3fd456f27224e1fe674cae67d676be05	0	0	0	0	289	0
3fdb6bae95722096447736a56b1d2163	59	24	32	0	0	0
3fdfeeda9844fe162118291b73752580	8	0	0	0	0	0
3fed1b220a15ae5024e0b766c9228a30	0	0	0	0	65	0
3feef34cee0086ab694bddddcae09e74	0	0	14	0	0	0
402731d8ec5e0d62d29102f19c18f82f	45	23	15	0	0	0
40292ad054d834ece133f376864fc4db	13	12	0	0	0	0
402cc14984a4be41ef727469b41412b9	0	94	0	0	0	0
402d6183bbd2f1fc20830efebc72fe9f	0	0	0	319	0	0
40394bfe4a2f991e0651e5a311f3ee24	0	16	0	0	0	0
40402c45d10848edbb272061507fdcdf	32	0	14	0	0	0
405681a4a1e0adddfad088cd35d31f20	0	0	0	0	0	45
405a0b4b4fd100cd5d1406e99411c759	0	7	7	0	0	0
405df896f5982ad459d4ab777ee8aa89	39	30	67	0	0	0
4062b79119e0c47f64ebf6be6f0a7677	12	0	0	0	0	0
4093b70340231f9d6161e45f2afc71fe	0	0	6	0	0	0
409a2bd06a45a8a37b4788ef26c3af8b	4	0	0	0	0	0
409ce43dbfdb3f9799623a027b73c7e4	28	28	0	0	0	0
409ecb84005fabc1197bbceb83a7016c	0	0	0	43	0	0
40a36ec6d5960c2c8a01c26a76f10359	0	0	0	0	166	0
40b07af0e58c42dbe0d2f72615e2cad9	0	75	0	0	0	0
40b243cdc5811b87ddbe129d82cb53f5	0	0	0	0	0	92
40bb9aeeabc05c77b3abf2804074cfc5	0	6	0	0	0	0
40bfa1be243934e37615349586685fd6	0	0	6	0	0	0
40d6b8afb4b2dd10421ee6157c3d4746	3	0	0	0	0	0
40e198d31823ac0103eabb270b609a19	4	0	0	0	0	0
40e3aaa75ea03848ec7f339ef9cdf458	119	42	36	0	0	0
40ec5963e8f68889b2b383e25771f47c	10	11	9	0	0	0
40ed079378105f392b90a4acc39cf75f	6	0	0	0	0	0
40ee8de5d496bfa0f57285ffd78e4a3b	0	0	0	0	0	286
40f09906a91e6edb45b36de968f902cb	65	79	58	0	0	0
40fd66c82b52cca390282396b22f9ca7	0	0	12	0	0	0
4123329ee76cb8225d69eb57ea6a8529	0	39	11	0	0	0
412948eea27e48c0df44bfda9c7572d1	23	0	0	0	0	0
412c346dff3869481e24b69caa3cf1bb	9	0	0	0	0	0
413a04187f14ad509b1a4db427fce23c	20	19	0	0	0	0
41591b0ab9ad6006009129401e93dc5e	11	0	0	0	0	0
4159d16b569bee1324f87bb3eb2ec003	0	6	0	0	0	0
416192ec3e0a3815122f1f42b0c1309c	0	0	16	0	0	0
416325e1c05d7417f2d280548b6b9b72	0	0	12	0	0	0
417326473cc034fb4a52a63835b976e7	0	0	0	0	35	0
41777e0762679d2a98c5c2871206247b	36	30	40	0	0	0
4181c4bb45f0baf7d596f73df574ee1b	22	15	72	0	0	0
4184498de713b8d522faa2d306f03234	0	18	0	0	0	0
4192d8761cb92b416ca1a3a02bac8b1b	17	6	13	0	0	0
41ab03a208873a43d743e86e27661aea	0	16	20	0	0	0
41ac1fc3834539cdbba0ad294d24aec0	10	0	0	0	0	0
41b38074eed996f758434628db1077cf	0	0	0	1786	0	0
41b79a673e6f03d84f0cba1150fce156	20	15	0	0	0	0
41b840d1cb64ad18ca5071b652ffec99	11	0	0	0	0	0
41bd61483dc6b59882fae1bd28c021bc	0	0	0	0	0	79
41c798ac39945f2b2b877e9529d6a684	0	0	0	0	0	298
41cc813df59c3e1a78f7f6663667d9ca	5	0	0	0	0	0
41cd0a24a556826fddad482e7007476e	0	0	24	0	0	0
41cefd183322c9ae1992dc0598fe5e67	77	27	22	0	0	0
41d1e2a1e6fd55d7e01d94757efbdb9e	0	0	11	0	0	0
41d305cd67167bfff103e03ba64c2613	253	145	242	0	0	0
41d5b5a259d026c9003dbc91e07e4c99	0	15	0	0	0	0
41d60a1e96597e970cdcc3d0984810b2	0	0	0	15	0	0
41dcd88ea7c007d75624238d0d0a0560	0	0	0	0	168	0
41e2c2f83d1256df834adf2e50a10feb	0	0	34	0	0	0
420f568121309e1cf4fb113b4700e6c7	0	0	8	0	0	0
4230b55fd3297b6fc4887ba6d5178cc5	29	0	0	0	0	0
423f3a1975c1a375a87eeb0c2bfce085	0	14	0	0	0	0
424480e9686c5c5f0c1c5d7bb52edd74	0	18	24	0	0	0
4245e5c936ad62a3dfd572c8d5b772d8	0	16	0	0	0	0
424aeae248e64470c0dadecb9c3c4eed	19	29	40	0	0	0
424deffa6fc6bfc81fd43ba070ec89cf	3	5	15	0	0	0
424ed3ecdeea2609cec8635ede4cad3e	0	7	0	0	0	0
4250edcf836a387fd2be4daf4808762d	0	0	0	0	31	0
425e5420d5cafb9bb09b51a5ce6c666e	13	0	0	0	0	0
4262bce07740a79eebaf51eba09cf554	7	5	18	0	0	0
427b298c7943f3c86245e9db5818b52a	13	21	0	0	0	0
427b38d64057bec62b1ddb81a94ccd50	0	0	0	0	196	0
427ff56d8940358b5c0c654a7ce6dc1b	22	0	11	0	0	0
428146dcc1579850c2095a75a8e711db	9	16	9	0	0	0
4283472ffb4c199ca4fe4a8554daed16	0	0	13	0	0	0
4288ba437779b697ae2a425e3b6c2954	0	4	0	0	0	0
429628aacbaf684b36db625b021978eb	0	5	0	0	0	0
4299ccce26698b0e9ca7659841eeadf8	0	0	0	0	190	0
42b0a4e63f0216aa505fe96a3a78afcc	0	0	0	0	10	0
42b90fd58c0bf83be7c99854fe1220e7	0	0	0	0	69	0
42bf0230501446f0ac41a1cfa733a019	7	34	40	0	0	0
42da23a400d4b19a707e8335e7208799	0	0	0	0	68	0
42dd66a93f8d2f19352c4d51b7ca049c	24	16	50	0	0	0
42e235460fc219b1e56086fc58e12510	60	68	40	0	0	0
42f6b8b4005ae6287a887e86b4afb4b4	0	10	23	0	0	0
42fd2f9e89e2b5caaf98917d366d5b45	0	0	0	0	120	0
42fe14c9669980890b3f116d2dbbd8e1	0	0	0	0	0	130
4304a21d88d96c188eb9b893cfcf29b1	0	6	0	0	0	0
43085ecbbd27d292119b0766ef05af94	0	15	0	0	0	0
4309eb2a65c8b2920b60af692067bd82	0	10	0	0	0	0
430dba74ae68dfcf0bead9c266dcd276	0	0	9	0	0	0
431e36e416408fa114cc298037b1707f	0	0	54	0	0	0
4324cd3cafdc831fe25b2e4886a14dbb	0	11	0	0	0	0
433390fbc901820b913632c0cd330950	39	28	32	0	0	0
43389235399f1947974fbc4812c277cd	78	26	18	0	0	0
433a0d1e9a59e345f87b857efbd6c62f	0	8	32	0	0	0
433c08828fb564d0c6ee16feb7e99a99	0	11	0	0	0	0
434217c8a7d5511b23082082d6d6e917	0	10	13	0	0	0
4342c5860f1e6244cc5b0137cc1b8b6e	14	0	0	0	0	0
434f263a9527059849dbbf6be8b06922	22	13	13	0	0	0
4358bebce0b0356c0055f2b2e1cdd33f	0	0	37	0	0	0
4359805c5479b9cba6bdcf738b10cbb2	2	0	0	0	0	0
4359a60e70fdaba1be7ffc6d2cab45fd	51	35	112	0	0	0
435d994b23e6f256d9a5426ec2e45530	28	0	0	0	0	0
4361b82016b0f654d114108ade2cd7b1	95	104	90	0	0	0
4366cf824130041cea48147d6560c7c9	74	45	71	0	0	0
43685ad26f65199216504be4a3c1c475	0	0	5	0	0	0
436e205ef6c2c7e69572a4a1cc79b05f	11	0	9	0	0	0
437c70c64be79baee22c442d2d15fd21	19	0	0	0	0	0
43954d2d5767af245438f120537c4583	0	13	0	0	0	0
4396e24eb875d489ebbbf9d999ebd2da	47	0	49	0	0	0
43af71e11d7abede227a86d56e9b3edb	0	0	0	339	423	585
43b837e854097a8bfb3112cbf2329b5e	0	0	0	70	0	0
43c3e530000e2375ec857ed407fe504d	80	0	69	0	0	0
43dd82fae50c04c6039f93c7166447f3	0	0	0	0	187	0
43e0f9cbd5ffe9fd6741c84675b7d6e3	0	3	0	0	0	0
4401f2eebcc6db055290f5ec0a822b1b	0	0	0	0	0	7
440fa88fa995e9052ea2281bcf7f2a01	0	0	0	98	0	0
441851930fb626ee9a548b36ba597e61	0	17	0	0	0	0
441b3b55b047968b6d0e33be4da73457	0	0	0	0	0	6
442f55f551763f9ee9d861a2603d529f	0	0	0	0	0	92
4433e6582152cc09a3944258ca14902c	0	0	18	0	0	0
443e3d031829282dfe88477ed1b89e08	10	0	0	0	0	0
444cd8e6f2dff92b0cda519863c107fc	0	0	0	733	0	0
44539bd6ece32664fd83138944ee39d7	0	5	0	0	0	0
4459d6fb15c4dd5b91742aefc0c9debc	15	0	0	0	0	0
44633c7aa002ae660f6aff3ec8aa1f30	0	16	0	0	0	0
4464aafbb781abf18b7ffa822e102761	0	0	40	0	0	0
446a35667bea201afbd46e8c38984b5e	0	22	0	0	0	0
446eca09fe2c36c144690f3fe8c5b4ca	0	52	0	0	0	0
447ca168b14574cd916692cc32c5b651	9	0	0	0	0	0
4487697b7e5042cd147b4a9c11f98810	11	0	0	0	0	0
448d2265dc1d4132b23794c597fe3958	0	0	0	0	0	204
44af21425fdd348bda525f7773d3bc38	0	18	0	0	0	0
44b3b3377166a2bf912725419d98bb54	34	22	19	0	0	0
44ba983e752d2c33a0df74413ace1d67	0	25	0	0	0	0
44c4595c58e9e0689bcb8d80ef17adc3	13	0	0	0	0	0
44ca1493e811ebde771200a1ab06676d	18	7	18	0	0	0
44d564ea0a2aa21e1a969f7ff61de899	17	14	0	0	0	0
44da9126db83d4ed846840e9f34b06b7	0	0	0	0	0	98
44dfc79b427dd68f07684f1433ef3d77	0	4	0	0	0	0
44e2483796a2bfb703dc53737479ade0	0	0	0	0	7	0
44e9772bbe076955b53aae317788572c	4	0	0	0	0	0
44f0a541a6cd8d18e61df69bf899ac7c	0	7	0	0	0	0
44f31b7159ecd7751d4196e3bdbeda9e	0	0	8	0	0	0
450b75cf0dc31655265a80f957a10a5a	0	7	10	0	0	0
450de33194e3e4ace1564553f1b9deec	21	0	0	0	0	0
451b88e0ab7598a46e201f7d8288e91b	0	18	0	0	0	0
451d35eb8fe956c6b7dab73ec7a26b80	0	0	0	0	75	0
4525b2b929888b0acaf7b319e14d4fe7	0	9	0	0	0	0
4528d5d99b3a1e40dcc94706c9ed8730	0	0	0	0	0	303
4529871ac68f88f055763a0e26208b3c	0	0	0	0	0	8
4531a8c7cd7e3cf864a12280d0d5dfa6	178	126	66	0	0	0
4531fe6c10d09457239ac1bb44f27024	0	0	25	0	0	0
45369043e75ccd1b16be8127489db656	0	0	0	0	0	360
4559bd4e84f6fbc5f3fe9966774cee6d	75	50	60	0	0	0
45655e3610aff4813da2246ef3d7469f	0	8	0	0	0	0
457451bdb0d8497f4b3d842fab0bf851	7	0	8	0	0	0
457617aec0ef40bd5770ec93c61fcd74	13	0	26	0	0	0
4578b1142f97f162f3c0fe9b7c813368	50	35	29	0	0	0
4579dbc1ea5f1ea27e779b768b844cc8	0	0	24	0	0	0
457d85b946c9cb79571cfa2e4fc338a4	0	0	47	0	0	0
458d1a8c59c35fba1e511e975bf2b8f2	116	144	177	0	0	0
458ecf718f10883034a282b1c072b4ee	0	0	16	0	0	0
4594ea92a3ad129b68a5795c55a4734a	0	0	17	0	0	0
45b1138424714e1613cbd751773310f9	0	0	7	0	0	0
45bad8e273a5398ee04ad47ef75cab18	0	11	0	0	0	0
45c5a9473288babc5697645df70bcc84	73	69	58	0	0	0
45c8e250ecd62d490587e115715bd2b4	0	3	0	0	0	0
45ce73ea5a9e1bc60a8c3438d6a7a5e2	4	0	0	0	0	0
45ce8c45f32391cff31b9b43b0e99181	54	56	45	0	0	0
45e47d800d82ed037fbf4d4947d1a9c4	0	8	0	0	0	0
45f7eb4a269c922cc660f4857b0b0655	0	0	68	0	0	0
45fb7a54746d7162371434aad6e33dc5	0	25	30	0	0	0
460c0712505e1f24c939042876ff33bb	0	0	0	0	0	16
46136fe77844a004486fc1c57d809cf6	0	0	2	0	0	0
46189357625328f8aa1af797ef63e959	0	41	0	0	0	0
4620826d495259877841139d5ee94a5b	15	0	0	0	0	0
462e04da1d6eba853a7a64a64196c5ff	0	0	19	0	0	0
4635cf8612a25a9ac52ff7dde02fbb30	0	18	7	0	0	0
4637676fb38ed2a1d150696b37061154	20	12	18	0	0	0
463f02d6289c356ca426c2a2ce07360a	22	15	15	0	0	0
46544ee311676c02eaa3e4483080012b	0	0	0	0	19	0
465812745fe895c2994f5f2b7def4a4e	0	22	0	0	0	0
465d005a521658c59652cd06c02eff66	0	67	63	0	0	0
467b1ac964f84b686c2ca776fb1178c8	0	0	0	0	2	0
467ef3ab5731cff24dd7d091014c2873	7	0	0	0	0	0
468067b19b0f8844113954838aa28675	0	0	15	0	0	0
[truncated: 5,279 more rows]
