# Supplementary material for: Large-scale differences in diversity and functional adaptations of prokaryotic communities from conserved and anthropogenically impacted mangrove sediments in a tropical estuary
Source: PeerJ. 2021 Sep 23;9:e12229. doi: 10.7717/peerj.12229 (PMC8465992; doi:10.7717/peerj.12229)
Supplement: Supplemental Information 4 — The biom file with taxonomic abundances per sample used in the analysis. [file peerj-09-12229-s004.xlsx]

## Sheet: Supplemental_Table_S2
# Constructed from biom file
#OTU ID	P1	P2	P3	M1	M2	M3	Sum of reads	>=100'
D_0__Archaea;D_1__Altiarchaeota;D_2__Altiarchaeia;__;__;__;__	0	0	0	0	7	9	16	FALSE
D_0__Archaea;D_1__Asgardaeota;D_2__Heimdallarchaeia;D_3__Candidatus Heimdallarchaeota archaeon AB_125;D_4__;D_5__;D_6__	0	0	0	0	0	10	10	FALSE
D_0__Archaea;D_1__Asgardaeota;D_2__Lokiarchaeia;D_3__uncultured Desulfurococcus sp.;D_4__;D_5__;D_6__	419	299	447	739	510	1343	3757	TRUE
D_0__Archaea;D_1__Asgardaeota;D_2__Odinarchaeia;D_3__unidentified archaeon;D_4__;D_5__;D_6__	0	0	0	0	8	0	8	FALSE
D_0__Archaea;D_1__Asgardaeota;__;__;__;__;__	0	0	0	75	57	59	191	TRUE
D_0__Archaea;D_1__Crenarchaeota;D_2__Bathyarchaeia;D_3__Candidatus Bathyarchaeota archaeon BA2;D_4__;D_5__;D_6__	0	2	0	31	32	24	89	TRUE
D_0__Archaea;D_1__Crenarchaeota;D_2__Bathyarchaeia;D_3__archaeon RBG_16_50_20;D_4__;D_5__;D_6__	0	0	0	12	0	0	12	FALSE
D_0__Archaea;D_1__Crenarchaeota;D_2__Bathyarchaeia;D_3__metagenome;D_4__;D_5__;D_6__	0	0	0	15	0	0	15	FALSE
D_0__Archaea;D_1__Crenarchaeota;D_2__Bathyarchaeia;D_3__miscellaneous Crenarchaeota group archaeon SMTZ-80;D_4__;D_5__;D_6__	0	124	0	0	20	0	144	TRUE
D_0__Archaea;D_1__Crenarchaeota;D_2__Bathyarchaeia;D_3__miscellaneous Crenarchaeota group archaeon SMTZ1-55;D_4__;D_5__;D_6__	0	0	0	99	70	121	290	TRUE
D_0__Archaea;D_1__Crenarchaeota;D_2__Bathyarchaeia;D_3__uncultured Thermofilum sp.;D_4__;D_5__;D_6__	0	0	11	122	46	63	242	TRUE
D_0__Archaea;D_1__Crenarchaeota;D_2__Bathyarchaeia;D_3__uncultured archaeon Arc.171;D_4__;D_5__;D_6__	130	60	0	8	0	0	198	TRUE
D_0__Archaea;D_1__Crenarchaeota;D_2__Bathyarchaeia;D_3__uncultured archaeon Arc.201;D_4__;D_5__;D_6__	221	0	0	0	0	0	221	TRUE
D_0__Archaea;D_1__Crenarchaeota;D_2__Bathyarchaeia;D_3__uncultured archaeon Arc.98;D_4__;D_5__;D_6__	102	0	92	114	63	61	432	TRUE
D_0__Archaea;D_1__Crenarchaeota;D_2__Bathyarchaeia;D_3__uncultured crenarchaeote MCG;D_4__;D_5__;D_6__	0	69	0	428	123	135	755	TRUE
D_0__Archaea;D_1__Crenarchaeota;D_2__Bathyarchaeia;D_3__uncultured crenarchaeote;D_4__;D_5__;D_6__	0	0	0	5	6	0	11	FALSE
D_0__Archaea;D_1__Crenarchaeota;D_2__Bathyarchaeia;D_3__uncultured eukaryote;D_4__;D_5__;D_6__	1768	1786	1661	563	369	438	6585	TRUE
D_0__Archaea;D_1__Crenarchaeota;D_2__Bathyarchaeia;D_3__uncultured euryarchaeote;D_4__;D_5__;D_6__	0	0	0	5	0	0	5	FALSE
D_0__Archaea;D_1__Crenarchaeota;D_2__Bathyarchaeia;D_3__uncultured marine crenarchaeote E48-1C;D_4__;D_5__;D_6__	0	0	7	0	0	0	7	FALSE
D_0__Archaea;D_1__Crenarchaeota;D_2__Bathyarchaeia;D_3__uncultured organism;D_4__;D_5__;D_6__	0	0	137	18	0	4	159	TRUE
D_0__Archaea;D_1__Crenarchaeota;D_2__Bathyarchaeia;D_3__uncultured thaumarchaeote;D_4__;D_5__;D_6__	0	0	0	1326	377	509	2212	TRUE
D_0__Archaea;D_1__Crenarchaeota;D_2__Bathyarchaeia;D_3__unidentified archaeon;D_4__;D_5__;D_6__	0	0	0	295	167	186	648	TRUE
D_0__Archaea;D_1__Crenarchaeota;D_2__Bathyarchaeia;__;__;__;__	1033	466	924	2001	941	991	6356	TRUE
D_0__Archaea;D_1__Crenarchaeota;D_2__Crenarchaeota Incertae Sedis;D_3__Aigarchaeales;D_4__Geothermarchaeaceae;__;__	0	0	14	0	0	0	14	FALSE
D_0__Archaea;D_1__Crenarchaeota;D_2__Verstraetearchaeia;D_3__Methanomethyliales;D_4__Methanomethyliaceae;D_5__Candidatus Methanomethylicus;D_6__Candidatus Methanomethylicus mesodigestum	0	0	0	7	0	0	7	FALSE
D_0__Archaea;D_1__Crenarchaeota;__;__;__;__;__	0	0	0	27	16	27	70	TRUE
D_0__Archaea;D_1__Diapherotrites;D_2__Iainarchaeia;D_3__unidentified archaeon;D_4__;D_5__;D_6__	0	0	0	0	3	0	3	FALSE
D_0__Archaea;D_1__Diapherotrites;D_2__Micrarchaeia;D_3__Candidatus Micrarchaeota archaeon CG1_02_55_41;D_4__;D_5__;D_6__	0	0	0	3	0	0	3	FALSE
D_0__Archaea;D_1__Euryarchaeota;D_2__Halobacteria;D_3__Halobacteriales;__;__;__	0	0	0	0	3	0	3	FALSE
D_0__Archaea;D_1__Euryarchaeota;D_2__Methanobacteria;D_3__Methanobacteriales;D_4__Methanobacteriaceae;D_5__Methanobacterium;D_6__Methanobacterium sp. A39	0	0	0	0	0	8	8	FALSE
D_0__Archaea;D_1__Euryarchaeota;D_2__Methanobacteria;D_3__Methanobacteriales;D_4__Methanobacteriaceae;D_5__Methanobacterium;__	0	0	0	77	44	54	175	TRUE
D_0__Archaea;D_1__Euryarchaeota;D_2__Methanobacteria;D_3__Methanobacteriales;D_4__Methanobacteriaceae;D_5__Methanobrevibacter;D_6__Methanobrevibacter sp. D5	0	0	0	0	0	11	11	FALSE
D_0__Archaea;D_1__Euryarchaeota;D_2__Methanobacteria;D_3__Methanobacteriales;D_4__Methanobacteriaceae;__;__	0	0	0	0	0	2	2	FALSE
D_0__Archaea;D_1__Euryarchaeota;D_2__Methanomicrobia;D_3__ANME-1;D_4__ANME-1a;D_5__uncultured archaeon GZfos12E1;D_6__	0	0	0	72	8	21	101	TRUE
D_0__Archaea;D_1__Euryarchaeota;D_2__Methanomicrobia;D_3__Methanocellales;D_4__Methanocellaceae;D_5__Methanocella;D_6__Methanocella paludicola SANAE	0	0	0	28	0	18	46	FALSE
D_0__Archaea;D_1__Euryarchaeota;D_2__Methanomicrobia;D_3__Methanocellales;D_4__Methanocellaceae;D_5__Methanocella;D_6__uncultured Methanomicrobia archaeon	0	0	0	31	20	49	100	TRUE
D_0__Archaea;D_1__Euryarchaeota;D_2__Methanomicrobia;D_3__Methanomicrobiales;D_4__Methanomicrobiaceae;D_5__Methanoculleus sp. 1H2c2;D_6__	0	0	0	6	0	0	6	FALSE
D_0__Archaea;D_1__Euryarchaeota;D_2__Methanomicrobia;D_3__Methanomicrobiales;D_4__Methanomicrobiaceae;D_5__Methanoculleus;__	0	0	0	1934	80	148	2162	TRUE
D_0__Archaea;D_1__Euryarchaeota;D_2__Methanomicrobia;D_3__Methanomicrobiales;D_4__Methanomicrobiaceae;D_5__Methanogenium;D_6__Methanococcoides sp. SBAK-TMA-1	0	0	0	0	7	0	7	FALSE
D_0__Archaea;D_1__Euryarchaeota;D_2__Methanomicrobia;D_3__Methanomicrobiales;D_4__Methanomicrobiaceae;D_5__Methanogenium;D_6__uncultured Methanogenium sp.	0	0	0	274	143	194	611	TRUE
D_0__Archaea;D_1__Euryarchaeota;D_2__Methanomicrobia;D_3__Methanomicrobiales;D_4__Methanomicrobiaceae;D_5__SDB;D_6__Methanoculleus sp. SDB	0	0	0	97	11	18	126	TRUE
D_0__Archaea;D_1__Euryarchaeota;D_2__Methanomicrobia;D_3__Methanomicrobiales;D_4__Methanomicrobiaceae;D_5__SDB;D_6__uncultured archaeon	0	0	0	43	8	13	64	TRUE
D_0__Archaea;D_1__Euryarchaeota;D_2__Methanomicrobia;D_3__Methanomicrobiales;D_4__Methanomicrobiaceae;__;__	0	0	0	306	22	90	418	TRUE
D_0__Archaea;D_1__Euryarchaeota;D_2__Methanomicrobia;D_3__Methanomicrobiales;D_4__Methanoregulaceae;D_5__Methanolinea;D_6__Methanolinea mesophila	0	0	0	0	2	0	2	FALSE
D_0__Archaea;D_1__Euryarchaeota;D_2__Methanomicrobia;D_3__Methanomicrobiales;D_4__Methanoregulaceae;D_5__Methanolinea;D_6__metagenome	0	0	0	279	0	33	312	TRUE
D_0__Archaea;D_1__Euryarchaeota;D_2__Methanomicrobia;D_3__Methanomicrobiales;D_4__Methanoregulaceae;D_5__Methanolinea;__	0	0	0	134	70	100	304	TRUE
D_0__Archaea;D_1__Euryarchaeota;D_2__Methanomicrobia;D_3__Methanomicrobiales;D_4__Methanoregulaceae;D_5__Methanoregula;D_6__uncultured Methanomicrobiales archaeon	0	0	0	40	0	21	61	TRUE
D_0__Archaea;D_1__Euryarchaeota;D_2__Methanomicrobia;D_3__Methanomicrobiales;D_4__Methanoregulaceae;D_5__Methanoregula;D_6__uncultured Methanoregula sp.	0	0	0	15	0	0	15	FALSE
D_0__Archaea;D_1__Euryarchaeota;D_2__Methanomicrobia;D_3__Methanomicrobiales;D_4__Methanoregulaceae;D_5__Methanoregula;D_6__uncultured bacterium	0	0	0	39	0	0	39	FALSE
D_0__Archaea;D_1__Euryarchaeota;D_2__Methanomicrobia;D_3__Methanomicrobiales;D_4__Methanoregulaceae;D_5__Methanoregula;__	0	0	0	274	128	184	586	TRUE
D_0__Archaea;D_1__Euryarchaeota;D_2__Methanomicrobia;D_3__Methanomicrobiales;D_4__Rice Cluster II;D_5__uncultured methanogenic archaeon;D_6__	0	0	0	11	8	0	19	FALSE
D_0__Archaea;D_1__Euryarchaeota;D_2__Methanomicrobia;D_3__Methanomicrobiales;D_4__uncultured;D_5__uncultured archaeon;D_6__	0	0	0	6	0	0	6	FALSE
D_0__Archaea;D_1__Euryarchaeota;D_2__Methanomicrobia;D_3__Methanosarcinales;D_4__ANME-2a-2b;D_5__archaeon enrichment culture clone AOM-Clone-E9;D_6__	0	0	0	33	0	16	49	FALSE
D_0__Archaea;D_1__Euryarchaeota;D_2__Methanomicrobia;D_3__Methanosarcinales;D_4__ANME-2a-2b;D_5__uncultured archaeon 2C83;D_6__	0	0	0	9	0	0	9	FALSE
D_0__Archaea;D_1__Euryarchaeota;D_2__Methanomicrobia;D_3__Methanosarcinales;D_4__ANME-2a-2b;__;__	0	0	0	194	39	38	271	TRUE
D_0__Archaea;D_1__Euryarchaeota;D_2__Methanomicrobia;D_3__Methanosarcinales;D_4__Methanosaetaceae;D_5__Methanosaeta;D_6__sediment metagenome	0	0	0	103	73	71	247	TRUE
D_0__Archaea;D_1__Euryarchaeota;D_2__Methanomicrobia;D_3__Methanosarcinales;D_4__Methanosaetaceae;D_5__Methanosaeta;D_6__uncultured archaeon 2C300X	0	0	0	68	21	40	129	TRUE
D_0__Archaea;D_1__Euryarchaeota;D_2__Methanomicrobia;D_3__Methanosarcinales;D_4__Methanosaetaceae;D_5__Methanosaeta;__	0	0	0	171	74	145	390	TRUE
D_0__Archaea;D_1__Euryarchaeota;D_2__Methanomicrobia;D_3__Methanosarcinales;D_4__Methanosarcinaceae;D_5__ANME-3;D_6__uncultured euryarchaeote	0	0	0	50	0	15	65	TRUE
D_0__Archaea;D_1__Euryarchaeota;D_2__Methanomicrobia;D_3__Methanosarcinales;D_4__Methanosarcinaceae;D_5__Methanosarcina;D_6__Methanosarcina lacustris Z-7289	0	0	0	11	0	0	11	FALSE
D_0__Archaea;D_1__Euryarchaeota;D_2__Methanomicrobia;D_3__Methanosarcinales;D_4__Methanosarcinaceae;D_5__Methanosarcina;__	0	0	0	85	67	64	216	TRUE
D_0__Archaea;D_1__Euryarchaeota;D_2__Methanomicrobia;D_3__Methanosarcinales;D_4__Methermicoccaceae;D_5__uncultured Methanosarcinales archaeon;D_6__	0	0	0	8	15	35	58	TRUE
D_0__Archaea;D_1__Euryarchaeota;D_2__Thermococci;D_3__Methanofastidiosales;D_4__uncultured;D_5__uncultured archaeon 19b-8;D_6__	0	0	4	39	30	30	103	TRUE
D_0__Archaea;D_1__Euryarchaeota;D_2__Thermoplasmata;D_3__JdFR-43;D_4__Thermoplasmatales archaeon JdFR-43;D_5__;D_6__	0	0	0	16	13	18	47	FALSE
D_0__Archaea;D_1__Euryarchaeota;D_2__Thermoplasmata;D_3__Marine Benthic Group D and DHVEG-1;D_4__archaeon enrichment culture clone AOM-Clone-F5;D_5__;D_6__	0	0	0	11	73	14	98	TRUE
D_0__Archaea;D_1__Euryarchaeota;D_2__Thermoplasmata;D_3__Marine Benthic Group D and DHVEG-1;D_4__uncultured archaeon 20c-52;D_5__;D_6__	0	0	0	201	94	172	467	TRUE
D_0__Archaea;D_1__Euryarchaeota;D_2__Thermoplasmata;D_3__Marine Benthic Group D and DHVEG-1;D_4__uncultured archaeon BURTON-12;D_5__;D_6__	0	0	0	268	262	474	1004	TRUE
D_0__Archaea;D_1__Euryarchaeota;D_2__Thermoplasmata;D_3__Marine Benthic Group D and DHVEG-1;D_4__uncultured eukaryote;D_5__;D_6__	0	0	0	0	0	28	28	FALSE
D_0__Archaea;D_1__Euryarchaeota;D_2__Thermoplasmata;D_3__Marine Benthic Group D and DHVEG-1;__;__;__	85	28	121	810	732	1204	2980	TRUE
D_0__Archaea;D_1__Euryarchaeota;D_2__Thermoplasmata;D_3__Marine Group III;D_4__uncultured Thermoplasmatales archaeon;D_5__;D_6__	0	5	8	35	29	31	108	TRUE
D_0__Archaea;D_1__Euryarchaeota;D_2__Thermoplasmata;D_3__Methanomassiliicoccales;D_4__Methanomassiliicoccaceae;D_5__Methanomassiliicoccus;D_6__Candidatus Methanomassiliicoccus intestinalis Issoire-Mx1	0	0	0	26	0	18	44	FALSE
D_0__Archaea;D_1__Euryarchaeota;D_2__Thermoplasmata;D_3__Methanomassiliicoccales;D_4__Methanomassiliicoccaceae;D_5__uncultured;D_6__metagenome	0	0	0	49	37	49	135	TRUE
D_0__Archaea;D_1__Euryarchaeota;D_2__Thermoplasmata;D_3__Methanomassiliicoccales;D_4__Methanomassiliicoccaceae;D_5__uncultured;__	0	0	0	38	7	0	45	FALSE
D_0__Archaea;D_1__Euryarchaeota;D_2__Thermoplasmata;D_3__Methanomassiliicoccales;D_4__Methanomassiliicoccaceae;__;__	0	0	0	26	11	21	58	TRUE
D_0__Archaea;D_1__Euryarchaeota;D_2__Thermoplasmata;D_3__Methanomassiliicoccales;D_4__uncultured;D_5__uncultured Thermoplasmatales archaeon;D_6__	0	0	0	94	60	110	264	TRUE
D_0__Archaea;D_1__Euryarchaeota;D_2__Thermoplasmata;D_3__Methanomassiliicoccales;D_4__uncultured;D_5__uncultured euryarchaeote;D_6__	0	0	0	0	0	13	13	FALSE
D_0__Archaea;D_1__Euryarchaeota;D_2__Thermoplasmata;D_3__Methanomassiliicoccales;D_4__uncultured;__;__	0	0	0	276	168	243	687	TRUE
D_0__Archaea;D_1__Euryarchaeota;D_2__Thermoplasmata;D_3__SG8-5;D_4__Euryarchaeota archaeon SG8-5;D_5__;D_6__	0	0	0	21	73	54	148	TRUE
D_0__Archaea;D_1__Euryarchaeota;D_2__Thermoplasmata;D_3__uncultured;D_4__uncultured Thermoplasmata archaeon;D_5__;D_6__	0	0	0	12	49	0	61	TRUE
D_0__Archaea;D_1__Euryarchaeota;D_2__Thermoplasmata;D_3__uncultured;D_4__uncultured archaeon 20c-39;D_5__;D_6__	0	9	0	38	13	24	84	TRUE
D_0__Archaea;D_1__Euryarchaeota;D_2__Thermoplasmata;D_3__uncultured;D_4__uncultured archaeon WCHD3-16;D_5__;D_6__	0	0	0	0	4	7	11	FALSE
D_0__Archaea;D_1__Euryarchaeota;D_2__Thermoplasmata;D_3__uncultured;D_4__uncultured eukaryote;D_5__;D_6__	0	0	0	24	32	26	82	TRUE
D_0__Archaea;D_1__Euryarchaeota;D_2__Thermoplasmata;D_3__uncultured;D_4__uncultured sediment archaeon;D_5__;D_6__	0	0	0	31	12	0	43	FALSE
D_0__Archaea;D_1__Euryarchaeota;D_2__Thermoplasmata;__;__;__;__	0	0	0	141	184	191	516	TRUE
D_0__Archaea;D_1__Euryarchaeota;__;__;__;__;__	21	7	6	188	58	205	485	TRUE
D_0__Archaea;D_1__Hadesarchaeaeota;__;__;__;__;__	0	0	0	3	0	0	3	FALSE
D_0__Archaea;D_1__Hydrothermarchaeota;__;__;__;__;__	0	0	0	8	0	9	17	FALSE
D_0__Archaea;D_1__Nanoarchaeaeota;D_2__Nanohaloarchaeia;D_3__Aenigmarchaeales;D_4__Candidatus Aenigmarchaeum subterraneum SCGC AAA011-O16;D_5__;D_6__	0	0	0	0	0	64	64	TRUE
D_0__Archaea;D_1__Nanoarchaeaeota;D_2__Nanohaloarchaeia;D_3__Aenigmarchaeales;D_4__Candidatus Micrarchaeota archaeon RBG_16_49_10;D_5__;D_6__	0	0	0	11	13	61	85	TRUE
D_0__Archaea;D_1__Nanoarchaeaeota;D_2__Woesearchaeia;D_3__Candidatus Levybacteria bacterium RIFOXYB1_FULL_40_17;D_4__;D_5__;D_6__	0	0	0	8	7	0	15	FALSE
D_0__Archaea;D_1__Nanoarchaeaeota;D_2__Woesearchaeia;D_3__Candidatus Pacearchaeota archaeon CG1_02_32_21;D_4__;D_5__;D_6__	0	0	0	0	7	0	7	FALSE
D_0__Archaea;D_1__Nanoarchaeaeota;D_2__Woesearchaeia;D_3__Candidatus Staskawiczbacteria bacterium RIFOXYA2_FULL_32_7;D_4__;D_5__;D_6__	0	0	0	10	18	17	45	FALSE
D_0__Archaea;D_1__Nanoarchaeaeota;D_2__Woesearchaeia;D_3__Desulfobacteraceae bacterium 4572_19;D_4__;D_5__;D_6__	0	0	0	0	16	37	53	TRUE
D_0__Archaea;D_1__Nanoarchaeaeota;D_2__Woesearchaeia;D_3__archaeon GW2011_AR18;D_4__;D_5__;D_6__	0	0	0	4	3	0	7	FALSE
D_0__Archaea;D_1__Nanoarchaeaeota;D_2__Woesearchaeia;D_3__uncultured bacterium;D_4__;D_5__;D_6__	0	0	0	22	0	0	22	FALSE
D_0__Archaea;D_1__Nanoarchaeaeota;D_2__Woesearchaeia;__;__;__;__	6	6	0	128	48	73	261	TRUE
D_0__Archaea;D_1__Thaumarchaeota;D_2__Marine Benthic Group A;D_3__uncultured Nitrosopumilales archaeon;D_4__;D_5__;D_6__	0	0	0	61	22	25	108	TRUE
D_0__Archaea;D_1__Thaumarchaeota;D_2__Marine Benthic Group A;D_3__uncultured marine benthic group A euryarchaeote;D_4__;D_5__;D_6__	0	0	0	27	11	17	55	TRUE
D_0__Archaea;D_1__Thaumarchaeota;D_2__Nitrososphaeria;D_3__Nitrosopumilales;D_4__Nitrosopumilaceae;D_5__uncultured archaeon CRA7-0cm;D_6__	0	0	254	0	0	0	254	TRUE
D_0__Archaea;D_1__Thaumarchaeota;D_2__Nitrososphaeria;D_3__Nitrosopumilales;D_4__Nitrosopumilaceae;__;__	0	0	819	0	0	0	819	TRUE
D_0__Archaea;D_1__Thaumarchaeota;D_2__Nitrososphaeria;D_3__Nitrososphaerales;D_4__Nitrososphaeraceae;D_5__Candidatus Nitrososphaera;__	0	0	0	7	0	0	7	FALSE
D_0__Archaea;D_1__Thaumarchaeota;D_2__Nitrososphaeria;D_3__Nitrososphaerales;D_4__Nitrososphaeraceae;D_5__uncultured euryarchaeote;D_6__	0	0	0	21	0	0	21	FALSE
D_0__Archaea;D_1__Thaumarchaeota;D_2__Nitrososphaeria;D_3__Nitrososphaerales;D_4__Nitrososphaeraceae;__;__	0	58	215	0	0	12	285	TRUE
D_0__Archaea;D_1__Thaumarchaeota;D_2__Nitrososphaeria;D_3__Nitrosotaleales;D_4__Nitrosotaleaceae;D_5__Candidatus Nitrosotalea;__	0	0	0	103	76	77	256	TRUE
D_0__Archaea;D_1__Thaumarchaeota;D_2__Nitrososphaeria;__;__;__;__	0	0	0	0	2	0	2	FALSE
D_0__Archaea;D_1__Thaumarchaeota;D_2__SCGC AB-179-E04;D_3__hot springs metagenome;D_4__;D_5__;D_6__	0	0	0	30	15	14	59	TRUE
D_0__Archaea;D_1__Thaumarchaeota;D_2__SCGC AB-179-E04;D_3__uncultured thaumarchaeote;D_4__;D_5__;D_6__	0	0	0	5	0	5	10	FALSE
D_0__Archaea;D_1__Thaumarchaeota;__;__;__;__;__	0	0	0	19	0	0	19	FALSE
D_0__Archaea;__;__;__;__;__;__	6	12	27	605	571	750	1971	TRUE
D_0__Bacteria;D_1__Acidobacteria;D_2__AT-s3-28;D_3__uncultured Acidobacteria bacterium;D_4__;D_5__;D_6__	0	0	0	0	0	13	13	FALSE
D_0__Bacteria;D_1__Acidobacteria;D_2__AT-s3-28;D_3__uncultured Acidobacteriaceae bacterium;D_4__;D_5__;D_6__	0	60	55	0	0	0	115	TRUE
D_0__Bacteria;D_1__Acidobacteria;D_2__Acidobacteriia;D_3__Acidobacteriales;D_4__Acidobacteriaceae (Subgroup 1);D_5__Granulicella;D_6__uncultured Acidobacteria bacterium	0	0	0	0	0	15	15	FALSE
D_0__Bacteria;D_1__Acidobacteria;D_2__Acidobacteriia;D_3__Acidobacteriales;D_4__Acidobacteriaceae (Subgroup 1);D_5__Occallatibacter;__	0	0	0	0	8	0	8	FALSE
D_0__Bacteria;D_1__Acidobacteria;D_2__Acidobacteriia;D_3__Acidobacteriales;D_4__Acidobacteriaceae (Subgroup 1);__;__	0	0	0	18	32	24	74	TRUE
D_0__Bacteria;D_1__Acidobacteria;D_2__Acidobacteriia;D_3__Acidobacteriales;D_4__uncultured Acidobacteriaceae bacterium;D_5__;D_6__	0	0	0	22	36	32	90	TRUE
D_0__Bacteria;D_1__Acidobacteria;D_2__Acidobacteriia;D_3__Acidobacteriales;D_4__uncultured;D_5__bacterium Ellin6527;D_6__	0	0	0	67	78	66	211	TRUE
D_0__Bacteria;D_1__Acidobacteria;D_2__Acidobacteriia;D_3__Acidobacteriales;D_4__uncultured;D_5__uncultured delta proteobacterium;D_6__	0	0	0	88	114	88	290	TRUE
D_0__Bacteria;D_1__Acidobacteria;D_2__Acidobacteriia;D_3__Acidobacteriales;D_4__uncultured;__;__	0	0	0	9	0	13	22	FALSE
D_0__Bacteria;D_1__Acidobacteria;D_2__Acidobacteriia;D_3__Acidobacteriales;__;__;__	0	0	0	41	35	25	101	TRUE
D_0__Bacteria;D_1__Acidobacteria;D_2__Acidobacteriia;D_3__Solibacterales;D_4__Solibacteraceae (Subgroup 3);D_5__AKIW659;D_6__uncultured soil bacterium	0	0	0	32	38	24	94	TRUE
D_0__Bacteria;D_1__Acidobacteria;D_2__Acidobacteriia;D_3__Solibacterales;D_4__Solibacteraceae (Subgroup 3);D_5__Bryobacter;D_6__metagenome	0	0	0	65	67	84	216	TRUE
D_0__Bacteria;D_1__Acidobacteria;D_2__Acidobacteriia;D_3__Solibacterales;D_4__Solibacteraceae (Subgroup 3);D_5__Bryobacter;D_6__uncultured actinobacterium	0	0	308	0	0	12	320	TRUE
D_0__Bacteria;D_1__Acidobacteria;D_2__Acidobacteriia;D_3__Solibacterales;D_4__Solibacteraceae (Subgroup 3);D_5__Bryobacter;__	0	0	0	29	21	36	86	TRUE
D_0__Bacteria;D_1__Acidobacteria;D_2__Acidobacteriia;D_3__Solibacterales;D_4__Solibacteraceae (Subgroup 3);D_5__Candidatus Solibacter;D_6__uncultured Edaphobacter sp.	0	0	0	19	25	35	79	TRUE
D_0__Bacteria;D_1__Acidobacteria;D_2__Acidobacteriia;D_3__Solibacterales;D_4__Solibacteraceae (Subgroup 3);D_5__Candidatus Solibacter;D_6__uncultured Solibacter sp.	0	0	0	107	87	86	280	TRUE
D_0__Bacteria;D_1__Acidobacteria;D_2__Acidobacteriia;D_3__Solibacterales;D_4__Solibacteraceae (Subgroup 3);D_5__Candidatus Solibacter;D_6__uncultured forest soil bacterium	0	0	0	0	0	12	12	FALSE
D_0__Bacteria;D_1__Acidobacteria;D_2__Acidobacteriia;D_3__Solibacterales;D_4__Solibacteraceae (Subgroup 3);D_5__Candidatus Solibacter;__	0	0	0	64	80	131	275	TRUE
D_0__Bacteria;D_1__Acidobacteria;D_2__Acidobacteriia;D_3__Solibacterales;D_4__Solibacteraceae (Subgroup 3);D_5__PAUC26f;D_6__uncultured bacterium AD370-D1	0	0	45	0	0	0	45	FALSE
D_0__Bacteria;D_1__Acidobacteria;D_2__Acidobacteriia;D_3__Solibacterales;D_4__Solibacteraceae (Subgroup 3);D_5__PAUC26f;__	0	0	0	15	0	8	23	FALSE
D_0__Bacteria;D_1__Acidobacteria;D_2__Acidobacteriia;D_3__Solibacterales;D_4__Solibacteraceae (Subgroup 3);D_5__Paludibaculum;__	0	0	0	9	8	43	60	TRUE
D_0__Bacteria;D_1__Acidobacteria;D_2__Acidobacteriia;D_3__Solibacterales;D_4__Solibacteraceae (Subgroup 3);D_5__uncultured Acidobacterium sp.;D_6__	0	0	0	54	46	48	148	TRUE
D_0__Bacteria;D_1__Acidobacteria;D_2__Acidobacteriia;D_3__Solibacterales;D_4__Solibacteraceae (Subgroup 3);__;__	0	0	0	204	117	211	532	TRUE
D_0__Bacteria;D_1__Acidobacteria;D_2__Acidobacteriia;D_3__Subgroup 2;D_4__uncultured eubacterium WD264;D_5__;D_6__	0	0	0	38	40	56	134	TRUE
D_0__Bacteria;D_1__Acidobacteria;D_2__Acidobacteriia;D_3__Subgroup 2;__;__;__	0	0	0	30	43	35	108	TRUE
D_0__Bacteria;D_1__Acidobacteria;D_2__Aminicenantia;D_3__Aminicenantales;D_4__Aminicenantes bacterium SCGC AAA252-F08;D_5__;D_6__	536	562	18	0	0	7	1123	TRUE
D_0__Bacteria;D_1__Acidobacteria;D_2__Aminicenantia;D_3__Aminicenantales;D_4__metagenome;D_5__;D_6__	0	0	0	0	8	8	16	FALSE
D_0__Bacteria;D_1__Acidobacteria;D_2__Aminicenantia;D_3__Aminicenantales;D_4__uncultured prokaryote;D_5__;D_6__	0	0	0	139	126	179	444	TRUE
D_0__Bacteria;D_1__Acidobacteria;D_2__Aminicenantia;D_3__Aminicenantales;D_4__uncultured soil bacterium;D_5__;D_6__	0	0	0	20	25	43	88	TRUE
D_0__Bacteria;D_1__Acidobacteria;D_2__Aminicenantia;D_3__Aminicenantales;__;__;__	0	0	0	35	49	49	133	TRUE
D_0__Bacteria;D_1__Acidobacteria;D_2__Blastocatellia (Subgroup 4);D_3__Blastocatellales;D_4__Blastocatellaceae;D_5__Stenotrophobacter;D_6__metagenome	0	0	0	0	5	0	5	FALSE
D_0__Bacteria;D_1__Acidobacteria;D_2__Blastocatellia (Subgroup 4);D_3__Blastocatellales;D_4__Blastocatellaceae;__;__	0	17	16	0	0	0	33	FALSE
D_0__Bacteria;D_1__Acidobacteria;D_2__Fischerbacteria;D_3__Candidatus Fischerbacteria bacterium RBG_13_37_8;D_4__;D_5__;D_6__	0	0	0	9	0	0	9	FALSE
D_0__Bacteria;D_1__Acidobacteria;D_2__Holophagae;D_3__Acanthopleuribacterales;D_4__Acanthopleuribacteraceae;D_5__Acanthopleuribacter;D_6__Acidobacteria bacterium DG1540	0	0	0	10	13	0	23	FALSE
D_0__Bacteria;D_1__Acidobacteria;D_2__Holophagae;D_3__Holophagales;D_4__Holophagaceae;__;__	0	0	0	0	0	19	19	FALSE
D_0__Bacteria;D_1__Acidobacteria;D_2__Holophagae;D_3__Subgroup 7;D_4__uncultured microorganism;D_5__;D_6__	0	0	0	0	0	27	27	FALSE
D_0__Bacteria;D_1__Acidobacteria;D_2__ODP1230B23.02;D_3__uncultured organism;D_4__;D_5__;D_6__	71	57	70	0	0	6	204	TRUE
D_0__Bacteria;D_1__Acidobacteria;D_2__Subgroup 11;D_3__uncultured Acidobacterium sp.;D_4__;D_5__;D_6__	0	0	0	41	44	59	144	TRUE
D_0__Bacteria;D_1__Acidobacteria;D_2__Subgroup 17;D_3__uncultured Geoalkalibacter sp.;D_4__;D_5__;D_6__	0	0	22	4	0	15	41	FALSE
D_0__Bacteria;D_1__Acidobacteria;D_2__Subgroup 17;D_3__uncultured bacterium gp17;D_4__;D_5__;D_6__	0	2	0	0	0	11	13	FALSE
D_0__Bacteria;D_1__Acidobacteria;D_2__Subgroup 17;__;__;__;__	295	467	14	0	0	8	784	TRUE
D_0__Bacteria;D_1__Acidobacteria;D_2__Subgroup 18;D_3__uncultured Acidobacterium sp.;D_4__;D_5__;D_6__	0	0	0	109	114	121	344	TRUE
D_0__Bacteria;D_1__Acidobacteria;D_2__Subgroup 18;D_3__uncultured bacterium gp18;D_4__;D_5__;D_6__	0	260	245	204	168	347	1224	TRUE
D_0__Bacteria;D_1__Acidobacteria;D_2__Subgroup 18;D_3__uncultured prokaryote;D_4__;D_5__;D_6__	0	0	0	55	60	81	196	TRUE
D_0__Bacteria;D_1__Acidobacteria;D_2__Subgroup 18;__;__;__;__	0	0	0	644	481	870	1995	TRUE
D_0__Bacteria;D_1__Acidobacteria;D_2__Subgroup 21;D_3__uncultured hydrocarbon seep bacterium BPC102;D_4__;D_5__;D_6__	0	0	0	0	7	0	7	FALSE
D_0__Bacteria;D_1__Acidobacteria;D_2__Subgroup 21;__;__;__;__	0	0	4	0	0	0	4	FALSE
D_0__Bacteria;D_1__Acidobacteria;D_2__Subgroup 22;D_3__uncultured Acidobacterium sp.;D_4__;D_5__;D_6__	0	0	127	0	0	0	127	TRUE
D_0__Bacteria;D_1__Acidobacteria;D_2__Subgroup 5;__;__;__;__	0	0	0	5	0	0	5	FALSE
D_0__Bacteria;D_1__Acidobacteria;D_2__Subgroup 6;D_3__uncultured bacterium 70;D_4__;D_5__;D_6__	0	0	0	34	75	49	158	TRUE
D_0__Bacteria;D_1__Acidobacteria;D_2__Subgroup 6;D_3__uncultured bacterium 92;D_4__;D_5__;D_6__	0	0	95	0	9	0	104	TRUE
D_0__Bacteria;D_1__Acidobacteria;D_2__Subgroup 6;D_3__uncultured bacterium AD106-G4;D_4__;D_5__;D_6__	0	0	56	0	0	0	56	TRUE
D_0__Bacteria;D_1__Acidobacteria;D_2__Subgroup 6;D_3__uncultured marine microorganism;D_4__;D_5__;D_6__	0	0	0	0	0	10	10	FALSE
D_0__Bacteria;D_1__Acidobacteria;D_2__Subgroup 6;D_3__unidentified;D_4__;D_5__;D_6__	0	0	0	3	0	5	8	FALSE
D_0__Bacteria;D_1__Acidobacteria;D_2__Subgroup 6;__;__;__;__	101	181	54	26	33	31	426	TRUE
D_0__Bacteria;D_1__Acidobacteria;D_2__Subgroup 9;D_3__unidentified bacterium wb1_A08;D_4__;D_5__;D_6__	72	48	221	0	0	0	341	TRUE
D_0__Bacteria;D_1__Acidobacteria;D_2__Thermoanaerobaculia;D_3__Thermoanaerobaculales;D_4__Thermoanaerobaculaceae;D_5__Subgroup 10;D_6__uncultured Bacteroidetes bacterium	0	0	0	0	7	0	7	FALSE
D_0__Bacteria;D_1__Acidobacteria;D_2__Thermoanaerobaculia;D_3__Thermoanaerobaculales;D_4__Thermoanaerobaculaceae;D_5__Subgroup 10;D_6__uncultured Holophaga sp.	0	0	27	0	0	0	27	FALSE
D_0__Bacteria;D_1__Acidobacteria;D_2__Thermoanaerobaculia;D_3__Thermoanaerobaculales;D_4__Thermoanaerobaculaceae;D_5__Subgroup 10;__	0	325	137	11	45	0	518	TRUE
D_0__Bacteria;D_1__Acidobacteria;D_2__Thermoanaerobaculia;D_3__Thermoanaerobaculales;D_4__Thermoanaerobaculaceae;D_5__Subgroup 23;D_6__uncultured Acidobacterium sp.	0	0	0	11	0	0	11	FALSE
D_0__Bacteria;D_1__Acidobacteria;D_2__Thermoanaerobaculia;D_3__Thermoanaerobaculales;D_4__Thermoanaerobaculaceae;D_5__Subgroup 23;D_6__uncultured Holophaga/Acidobacterium Sva0450	434	430	5	0	55	0	924	TRUE
D_0__Bacteria;D_1__Acidobacteria;D_2__Thermoanaerobaculia;D_3__Thermoanaerobaculales;D_4__Thermoanaerobaculaceae;D_5__Subgroup 23;__	0	529	517	90	173	95	1404	TRUE
D_0__Bacteria;D_1__Acidobacteria;D_2__Thermoanaerobaculia;D_3__Thermoanaerobaculales;D_4__Thermoanaerobaculaceae;D_5__Thermoanaerobaculum;__	0	0	5	2	9	0	16	FALSE
D_0__Bacteria;D_1__Acidobacteria;D_2__Thermoanaerobaculia;D_3__Thermoanaerobaculales;D_4__Thermoanaerobaculaceae;__;__	0	0	57	0	26	0	83	TRUE
D_0__Bacteria;D_1__Acidobacteria;__;__;__;__;__	63	0	257	63	104	66	553	TRUE
D_0__Bacteria;D_1__Actinobacteria;D_2__Acidimicrobiia;D_3__Actinomarinales;D_4__uncultured;D_5__marine metagenome;D_6__	0	394	0	0	0	0	394	TRUE
D_0__Bacteria;D_1__Actinobacteria;D_2__Acidimicrobiia;D_3__Actinomarinales;D_4__uncultured;D_5__uncultured Actinobacteridae bacterium;D_6__	173	0	326	14	0	0	513	TRUE
D_0__Bacteria;D_1__Actinobacteria;D_2__Acidimicrobiia;D_3__Actinomarinales;D_4__uncultured;D_5__uncultured Iamia sp.;D_6__	103	381	1153	0	0	0	1637	TRUE
D_0__Bacteria;D_1__Actinobacteria;D_2__Acidimicrobiia;D_3__Actinomarinales;D_4__uncultured;__;__	163	612	251	0	0	0	1026	TRUE
D_0__Bacteria;D_1__Actinobacteria;D_2__Acidimicrobiia;D_3__Actinomarinales;__;__;__	0	0	101	0	5	0	106	TRUE
D_0__Bacteria;D_1__Actinobacteria;D_2__Acidimicrobiia;D_3__IMCC26256;D_4__uncultured Cellulomonadaceae bacterium;D_5__;D_6__	0	0	0	0	9	0	9	FALSE
D_0__Bacteria;D_1__Actinobacteria;D_2__Acidimicrobiia;D_3__IMCC26256;__;__;__	0	0	87	0	0	0	87	TRUE
D_0__Bacteria;D_1__Actinobacteria;D_2__Acidimicrobiia;D_3__Microtrichales;D_4__Ilumatobacteraceae;D_5__CL500-29 marine group;D_6__marine metagenome	0	0	0	0	0	14	14	FALSE
D_0__Bacteria;D_1__Actinobacteria;D_2__Acidimicrobiia;D_3__Microtrichales;D_4__Ilumatobacteraceae;D_5__Ilumatobacter;D_6__marine metagenome	0	0	0	0	14	0	14	FALSE
D_0__Bacteria;D_1__Actinobacteria;D_2__Acidimicrobiia;D_3__Microtrichales;D_4__Ilumatobacteraceae;D_5__Ilumatobacter;D_6__metagenome	0	0	0	9	0	0	9	FALSE
D_0__Bacteria;D_1__Actinobacteria;D_2__Acidimicrobiia;D_3__Microtrichales;D_4__Ilumatobacteraceae;D_5__uncultured;D_6__uncultured marine bacterium	0	238	0	0	0	0	238	TRUE
D_0__Bacteria;D_1__Actinobacteria;D_2__Acidimicrobiia;D_3__Microtrichales;D_4__Microtrichaceae;D_5__uncultured;D_6__Acidimicrobidae bacterium YM18-244	0	147	58	0	0	0	205	TRUE
D_0__Bacteria;D_1__Actinobacteria;D_2__Acidimicrobiia;D_3__Microtrichales;D_4__Microtrichaceae;__;__	0	20	0	0	0	0	20	FALSE
D_0__Bacteria;D_1__Actinobacteria;D_2__Acidimicrobiia;D_3__Microtrichales;D_4__uncultured;D_5__bacterium YC-LK-LKJ22;D_6__	0	15	0	0	0	0	15	FALSE
D_0__Bacteria;D_1__Actinobacteria;D_2__Acidimicrobiia;D_3__Microtrichales;D_4__uncultured;__;__	76	112	0	0	0	0	188	TRUE
D_0__Bacteria;D_1__Actinobacteria;D_2__Acidimicrobiia;D_3__Microtrichales;__;__;__	0	233	80	0	9	15	337	TRUE
D_0__Bacteria;D_1__Actinobacteria;D_2__Acidimicrobiia;__;__;__;__	13	176	18	5	9	5	226	TRUE
D_0__Bacteria;D_1__Actinobacteria;D_2__Actinobacteria;D_3__Actinomycetales;D_4__Actinomycetaceae;D_5__Actinomyces;__	0	0	0	0	16	0	16	FALSE
D_0__Bacteria;D_1__Actinobacteria;D_2__Actinobacteria;D_3__Bifidobacteriales;D_4__Bifidobacteriaceae;D_5__Bifidobacterium;__	0	0	0	0	133	10	143	TRUE
D_0__Bacteria;D_1__Actinobacteria;D_2__Actinobacteria;D_3__Corynebacteriales;D_4__Corynebacteriaceae;D_5__Corynebacterium 1;D_6__Corynebacterium genitalium ATCC 33030	0	0	0	0	16	0	16	FALSE
D_0__Bacteria;D_1__Actinobacteria;D_2__Actinobacteria;D_3__Corynebacteriales;D_4__Corynebacteriaceae;D_5__Corynebacterium 1;D_6__Corynebacterium glaucum	0	0	0	12	12	13	37	FALSE
D_0__Bacteria;D_1__Actinobacteria;D_2__Actinobacteria;D_3__Corynebacteriales;D_4__Corynebacteriaceae;D_5__Corynebacterium 1;__	0	0	0	0	49	40	89	TRUE
D_0__Bacteria;D_1__Actinobacteria;D_2__Actinobacteria;D_3__Corynebacteriales;D_4__Corynebacteriaceae;__;__	0	0	0	0	16	23	39	FALSE
D_0__Bacteria;D_1__Actinobacteria;D_2__Actinobacteria;D_3__Corynebacteriales;D_4__Mycobacteriaceae;D_5__Mycobacterium;D_6__Mycobacterium fragae	0	0	0	0	5	0	5	FALSE
D_0__Bacteria;D_1__Actinobacteria;D_2__Actinobacteria;D_3__Corynebacteriales;D_4__Mycobacteriaceae;D_5__Mycobacterium;__	173	578	382	0	5	15	1153	TRUE
D_0__Bacteria;D_1__Actinobacteria;D_2__Actinobacteria;D_3__Corynebacteriales;D_4__Nocardiaceae;D_5__Rhodococcus;__	0	0	5	0	10	0	15	FALSE
D_0__Bacteria;D_1__Actinobacteria;D_2__Actinobacteria;D_3__Frankiales;D_4__Acidothermaceae;D_5__Acidothermus;D_6__Thermomonosporaceae bacterium YE4-D4-16-CH2	0	0	0	0	10	0	10	FALSE
D_0__Bacteria;D_1__Actinobacteria;D_2__Actinobacteria;D_3__Frankiales;D_4__Acidothermaceae;D_5__Acidothermus;D_6__uncultured bacterium DA016	0	0	0	0	0	14	14	FALSE
D_0__Bacteria;D_1__Actinobacteria;D_2__Actinobacteria;D_3__Frankiales;D_4__Geodermatophilaceae;D_5__Blastococcus;D_6__uncultured Geodermatophilaceae bacterium	0	0	0	0	0	8	8	FALSE
D_0__Bacteria;D_1__Actinobacteria;D_2__Actinobacteria;D_3__Frankiales;__;__;__	0	0	0	0	16	0	16	FALSE
D_0__Bacteria;D_1__Actinobacteria;D_2__Actinobacteria;D_3__Micrococcales;D_4__Cellulomonadaceae;D_5__Cellulomonas;__	0	0	0	0	0	7	7	FALSE
D_0__Bacteria;D_1__Actinobacteria;D_2__Actinobacteria;D_3__Micrococcales;D_4__Dermatophilaceae;D_5__uncultured;D_6__uncultured actinobacterium	0	0	0	175	203	254	632	TRUE
D_0__Bacteria;D_1__Actinobacteria;D_2__Actinobacteria;D_3__Micrococcales;D_4__Intrasporangiaceae;__;__	0	0	0	20	0	11	31	FALSE
D_0__Bacteria;D_1__Actinobacteria;D_2__Actinobacteria;D_3__Micrococcales;D_4__Microbacteriaceae;D_5__Agromyces;__	0	0	0	0	0	6	6	FALSE
D_0__Bacteria;D_1__Actinobacteria;D_2__Actinobacteria;D_3__Micrococcales;D_4__Microbacteriaceae;D_5__Leucobacter;D_6__Leucobacter alluvii	0	0	0	0	0	25	25	FALSE
D_0__Bacteria;D_1__Actinobacteria;D_2__Actinobacteria;D_3__Micrococcales;D_4__Microbacteriaceae;D_5__Leucobacter;D_6__Leucobacter populi	0	0	0	0	0	7	7	FALSE
D_0__Bacteria;D_1__Actinobacteria;D_2__Actinobacteria;D_3__Micrococcales;D_4__Microbacteriaceae;D_5__Microbacterium;__	0	0	0	0	31	0	31	FALSE
D_0__Bacteria;D_1__Actinobacteria;D_2__Actinobacteria;D_3__Micrococcales;D_4__Microbacteriaceae;__;__	0	0	0	0	17	0	17	FALSE
D_0__Bacteria;D_1__Actinobacteria;D_2__Actinobacteria;D_3__Micrococcales;D_4__Micrococcaceae;D_5__Kocuria;__	0	0	0	17	30	53	100	TRUE
D_0__Bacteria;D_1__Actinobacteria;D_2__Actinobacteria;D_3__Micrococcales;D_4__Micrococcaceae;D_5__Micrococcus;__	0	0	0	7	0	49	56	TRUE
D_0__Bacteria;D_1__Actinobacteria;D_2__Actinobacteria;D_3__Micrococcales;D_4__Micrococcaceae;D_5__Rothia;D_6__Rothia sp. T7	0	0	0	0	14	0	14	FALSE
D_0__Bacteria;D_1__Actinobacteria;D_2__Actinobacteria;D_3__Micrococcales;D_4__Micrococcaceae;__;__	387	295	330	0	50	24	1086	TRUE
D_0__Bacteria;D_1__Actinobacteria;D_2__Actinobacteria;D_3__Micrococcales;__;__;__	0	0	95	0	7	0	102	TRUE
D_0__Bacteria;D_1__Actinobacteria;D_2__Actinobacteria;D_3__Micromonosporales;D_4__Micromonosporaceae;D_5__Micromonospora;__	0	0	66	0	0	0	66	TRUE
D_0__Bacteria;D_1__Actinobacteria;D_2__Actinobacteria;D_3__PeM15;D_4__actinobacterium GP-6;D_5__;D_6__	0	0	14	0	0	0	14	FALSE
D_0__Bacteria;D_1__Actinobacteria;D_2__Actinobacteria;D_3__Propionibacteriales;D_4__Nocardioidaceae;D_5__Nocardioides;__	0	0	19	0	0	34	53	TRUE
D_0__Bacteria;D_1__Actinobacteria;D_2__Actinobacteria;D_3__Propionibacteriales;D_4__Propionibacteriaceae;D_5__Cutibacterium;__	0	0	0	0	63	151	214	TRUE
D_0__Bacteria;D_1__Actinobacteria;D_2__Actinobacteria;D_3__Propionibacteriales;D_4__Propionibacteriaceae;D_5__uncultured;D_6__Gram-positive bacterium SOGA22	0	44	0	0	4	0	48	FALSE
D_0__Bacteria;D_1__Actinobacteria;D_2__Actinobacteria;D_3__Pseudonocardiales;D_4__Pseudonocardiaceae;D_5__Actinomycetospora;__	0	13	0	0	0	0	13	FALSE
D_0__Bacteria;D_1__Actinobacteria;D_2__Actinobacteria;D_3__Pseudonocardiales;D_4__Pseudonocardiaceae;D_5__Pseudonocardia;__	0	0	0	10	15	11	36	FALSE
D_0__Bacteria;D_1__Actinobacteria;D_2__Actinobacteria;D_3__Streptomycetales;D_4__Streptomycetaceae;D_5__Streptomyces;D_6__Streptomyces sp. SMS_10	0	0	0	0	9	0	9	FALSE
D_0__Bacteria;D_1__Actinobacteria;D_2__Actinobacteria;D_3__Streptomycetales;D_4__Streptomycetaceae;D_5__Streptomyces;__	39	34	0	0	40	0	113	TRUE
D_0__Bacteria;D_1__Actinobacteria;D_2__Actinobacteria;D_3__Streptomycetales;D_4__Streptomycetaceae;__;__	0	0	21	0	15	0	36	FALSE
D_0__Bacteria;D_1__Actinobacteria;D_2__Actinobacteria;D_3__Streptosporangiales;D_4__Thermomonosporaceae;D_5__Actinomadura;D_6__Actinomadura sp. Shinshu-MS-03	0	0	0	0	0	8	8	FALSE
D_0__Bacteria;D_1__Actinobacteria;D_2__Actinobacteria;__;__;__;__	0	0	0	9	38	22	69	TRUE
D_0__Bacteria;D_1__Actinobacteria;D_2__Coriobacteriia;D_3__Coriobacteriales;D_4__Atopobiaceae;D_5__Olsenella;__	0	0	0	0	14	0	14	FALSE
D_0__Bacteria;D_1__Actinobacteria;D_2__Coriobacteriia;D_3__Coriobacteriales;D_4__Atopobiaceae;__;__	0	0	0	0	23	0	23	FALSE
D_0__Bacteria;D_1__Actinobacteria;D_2__Coriobacteriia;D_3__Coriobacteriales;D_4__Eggerthellaceae;D_5__Enterorhabdus;D_6__Enterorhabdus caecimuris B7	0	0	0	0	0	10	10	FALSE
D_0__Bacteria;D_1__Actinobacteria;D_2__Coriobacteriia;D_3__Coriobacteriales;D_4__Eggerthellaceae;D_5__Enterorhabdus;D_6__Enterorhabdus muris	0	0	0	0	31	0	31	FALSE
D_0__Bacteria;D_1__Actinobacteria;D_2__Coriobacteriia;D_3__FS118-23B-02;D_4__marine sediment metagenome;D_5__;D_6__	0	0	24	0	0	0	24	FALSE
D_0__Bacteria;D_1__Actinobacteria;D_2__Coriobacteriia;D_3__OPB41;D_4__Coriobacteriaceae bacterium EMTCatB1;D_5__;D_6__	0	0	65	0	0	0	65	TRUE
D_0__Bacteria;D_1__Actinobacteria;D_2__Coriobacteriia;D_3__OPB41;D_4__iron-reducing bacterium enrichment culture clone HN-HFO4;D_5__;D_6__	0	0	0	0	4	0	4	FALSE
D_0__Bacteria;D_1__Actinobacteria;D_2__Coriobacteriia;D_3__OPB41;D_4__permafrost metagenome;D_5__;D_6__	0	0	0	39	0	53	92	TRUE
D_0__Bacteria;D_1__Actinobacteria;D_2__Coriobacteriia;D_3__OPB41;D_4__uncultured Coriobacteriales bacterium;D_5__;D_6__	0	0	0	0	0	35	35	FALSE
D_0__Bacteria;D_1__Actinobacteria;D_2__Coriobacteriia;D_3__OPB41;__;__;__	0	0	0	0	14	0	14	FALSE
D_0__Bacteria;D_1__Actinobacteria;D_2__Coriobacteriia;__;__;__;__	71	0	0	0	0	0	71	TRUE
D_0__Bacteria;D_1__Actinobacteria;D_2__MB-A2-108;D_3__Actinobacteria bacterium RBG_19FT_COMBO_70_19;D_4__;D_5__;D_6__	0	12	13	0	0	0	25	FALSE
D_0__Bacteria;D_1__Actinobacteria;D_2__RBG-16-55-12;D_3__Actinobacteria bacterium RBG_16_55_12;D_4__;D_5__;D_6__	180	74	147	0	0	0	401	TRUE
D_0__Bacteria;D_1__Actinobacteria;D_2__RBG-16-55-12;__;__;__;__	0	0	0	53	28	37	118	TRUE
D_0__Bacteria;D_1__Actinobacteria;D_2__Thermoleophilia;D_3__Gaiellales;D_4__uncultured;D_5__uncultured Gaiella sp.;D_6__	0	0	8	0	0	14	22	FALSE
D_0__Bacteria;D_1__Actinobacteria;D_2__Thermoleophilia;D_3__Gaiellales;D_4__uncultured;D_5__uncultured Rubrobacterales bacterium;D_6__	0	0	0	0	0	21	21	FALSE
D_0__Bacteria;D_1__Actinobacteria;D_2__Thermoleophilia;D_3__Gaiellales;D_4__uncultured;D_5__uncultured prokaryote;D_6__	0	0	0	0	0	21	21	FALSE
D_0__Bacteria;D_1__Actinobacteria;D_2__Thermoleophilia;D_3__Gaiellales;D_4__uncultured;__;__	0	61	99	0	38	17	215	TRUE
D_0__Bacteria;D_1__Actinobacteria;D_2__Thermoleophilia;D_3__Gaiellales;__;__;__	13	0	0	0	0	0	13	FALSE
D_0__Bacteria;D_1__Actinobacteria;D_2__Thermoleophilia;D_3__Solirubrobacterales;D_4__67-14;__;__	96	415	0	0	0	0	511	TRUE
D_0__Bacteria;D_1__Actinobacteria;D_2__Thermoleophilia;D_3__Solirubrobacterales;D_4__Solirubrobacteraceae;D_5__Conexibacter;D_6__uncultured Conexibacteraceae bacterium	0	0	0	0	11	0	11	FALSE
D_0__Bacteria;D_1__Actinobacteria;D_2__Thermoleophilia;D_3__Solirubrobacterales;D_4__Solirubrobacteraceae;D_5__uncultured;D_6__soil metagenome	0	0	0	11	0	0	11	FALSE
D_0__Bacteria;D_1__Actinobacteria;D_2__Thermoleophilia;D_3__Solirubrobacterales;__;__;__	0	0	0	0	0	19	19	FALSE
D_0__Bacteria;D_1__Actinobacteria;D_2__WCHB1-81;D_3__uncultured actinobacterium;D_4__;D_5__;D_6__	231	0	0	18	16	0	265	TRUE
D_0__Bacteria;D_1__Actinobacteria;D_2__WCHB1-81;__;__;__;__	0	0	0	0	0	31	31	FALSE
D_0__Bacteria;D_1__Actinobacteria;__;__;__;__;__	65	622	173	22	19	33	934	TRUE
D_0__Bacteria;D_1__Aegiribacteria;D_2__Candidatus Aegiribacteria bacterium MLS_C;D_3__;D_4__;D_5__;D_6__	0	0	0	0	7	0	7	FALSE
D_0__Bacteria;D_1__Aegiribacteria;D_2__metagenome;D_3__;D_4__;D_5__;D_6__	7	0	0	0	0	0	7	FALSE
D_0__Bacteria;D_1__Armatimonadetes;D_2__Chthonomonadetes;D_3__Chthonomonadales;D_4__uncultured bacterium SJA-22;D_5__;D_6__	0	0	0	0	0	12	12	FALSE
D_0__Bacteria;D_1__Armatimonadetes;D_2__DG-56;D_3__candidate division KD3-62 bacterium DG_56;D_4__;D_5__;D_6__	0	0	0	0	13	0	13	FALSE
D_0__Bacteria;D_1__Armatimonadetes;D_2__DG-56;D_3__uncultured soil bacterium;D_4__;D_5__;D_6__	0	0	0	14	17	15	46	FALSE
D_0__Bacteria;D_1__Armatimonadetes;D_2__Fimbriimonadia;D_3__Fimbriimonadales;D_4__Fimbriimonadaceae;__;__	0	0	0	0	5	0	5	FALSE
D_0__Bacteria;D_1__Armatimonadetes;D_2__Fimbriimonadia;D_3__Fimbriimonadales;__;__;__	0	0	0	13	12	17	42	FALSE
D_0__Bacteria;D_1__Armatimonadetes;D_2__uncultured;D_3__uncultured bacterium SJA-121;D_4__;D_5__;D_6__	35	0	0	0	19	0	54	TRUE
D_0__Bacteria;D_1__Armatimonadetes;D_2__uncultured;D_3__uncultured bacterium SJA-176;D_4__;D_5__;D_6__	0	0	0	22	39	62	123	TRUE
D_0__Bacteria;D_1__Armatimonadetes;__;__;__;__;__	0	0	9	0	0	0	9	FALSE
D_0__Bacteria;D_1__Atribacteria;D_2__JS1;D_3__Atribacteria bacterium JGI 0000014-F07;D_4__;D_5__;D_6__	0	0	2	0	0	0	2	FALSE
D_0__Bacteria;D_1__Atribacteria;D_2__JS1;D_3__terrestrial metagenome;D_4__;D_5__;D_6__	8	0	0	8	17	15	48	FALSE
D_0__Bacteria;D_1__BRC1;D_2__uncultured delta proteobacterium;D_3__;D_4__;D_5__;D_6__	0	0	0	49	48	55	152	TRUE
D_0__Bacteria;D_1__BRC1;D_2__uncultured gamma proteobacterium;D_3__;D_4__;D_5__;D_6__	0	0	6	0	2	0	8	FALSE
D_0__Bacteria;D_1__BRC1;D_2__uncultured soil bacterium PBS-III-4;D_3__;D_4__;D_5__;D_6__	0	0	0	3	0	0	3	FALSE
D_0__Bacteria;D_1__Bacteroidetes;D_2__Bacteroidia;D_3__Bacteroidales;D_4__Bacteroidaceae;D_5__Bacteroides;D_6__Bacteroides sp. 3_2_5	0	0	0	17	38	168	223	TRUE
D_0__Bacteria;D_1__Bacteroidetes;D_2__Bacteroidia;D_3__Bacteroidales;D_4__Bacteroidaceae;D_5__Bacteroides;D_6__Bacteroides uniformis CL03T12C37	0	0	0	92	115	727	934	TRUE
D_0__Bacteria;D_1__Bacteroidetes;D_2__Bacteroidia;D_3__Bacteroidales;D_4__Bacteroidaceae;D_5__Bacteroides;__	0	0	0	209	722	4316	5247	TRUE
D_0__Bacteria;D_1__Bacteroidetes;D_2__Bacteroidia;D_3__Bacteroidales;D_4__Bacteroidetes BD2-2;D_5__uncultured Bacteroidales bacterium;D_6__	0	0	0	8	37	0	45	FALSE
D_0__Bacteria;D_1__Bacteroidetes;D_2__Bacteroidia;D_3__Bacteroidales;D_4__Bacteroidetes vadinHA17;D_5__uncultured bacterium SHA-25;D_6__	0	0	0	30	42	56	128	TRUE
D_0__Bacteria;D_1__Bacteroidetes;D_2__Bacteroidia;D_3__Bacteroidales;D_4__Bacteroidetes vadinHA17;__;__	23	0	35	616	905	1227	2806	TRUE
D_0__Bacteria;D_1__Bacteroidetes;D_2__Bacteroidia;D_3__Bacteroidales;D_4__Barnesiellaceae;D_5__Barnesiella;D_6__Barnesiella viscericola DSM 18177	0	0	0	0	0	5	5	FALSE
D_0__Bacteria;D_1__Bacteroidetes;D_2__Bacteroidia;D_3__Bacteroidales;D_4__Barnesiellaceae;D_5__Barnesiella;D_6__unidentified	0	0	0	6	18	70	94	TRUE
D_0__Bacteria;D_1__Bacteroidetes;D_2__Bacteroidia;D_3__Bacteroidales;D_4__Barnesiellaceae;D_5__Coprobacter;__	0	0	0	0	0	8	8	FALSE
D_0__Bacteria;D_1__Bacteroidetes;D_2__Bacteroidia;D_3__Bacteroidales;D_4__COB P4-1 termite group;__;__	0	0	0	0	2	0	2	FALSE
D_0__Bacteria;D_1__Bacteroidetes;D_2__Bacteroidia;D_3__Bacteroidales;D_4__Marinifilaceae;D_5__Odoribacter;D_6__Culturomica massiliensis	0	0	0	0	16	5	21	FALSE
D_0__Bacteria;D_1__Bacteroidetes;D_2__Bacteroidia;D_3__Bacteroidales;D_4__Marinifilaceae;D_5__uncultured organism;D_6__	0	0	0	0	11	0	11	FALSE
D_0__Bacteria;D_1__Bacteroidetes;D_2__Bacteroidia;D_3__Bacteroidales;D_4__Marinilabiliaceae;D_5__Carboxylicivirga;D_6__Carboxylicivirga flava	0	0	0	0	8	0	8	FALSE
D_0__Bacteria;D_1__Bacteroidetes;D_2__Bacteroidia;D_3__Bacteroidales;D_4__Muribaculaceae;D_5__Muribaculum;D_6__Parabacteroides sp. YL27	0	0	0	0	121	98	219	TRUE
D_0__Bacteria;D_1__Bacteroidetes;D_2__Bacteroidia;D_3__Bacteroidales;D_4__Muribaculaceae;D_5__gut metagenome;D_6__	0	0	0	0	32	0	32	FALSE
D_0__Bacteria;D_1__Bacteroidetes;D_2__Bacteroidia;D_3__Bacteroidales;D_4__Muribaculaceae;D_5__metagenome;D_6__	0	0	0	0	6	19	25	FALSE
D_0__Bacteria;D_1__Bacteroidetes;D_2__Bacteroidia;D_3__Bacteroidales;D_4__Muribaculaceae;__;__	0	0	0	0	21	0	21	FALSE
D_0__Bacteria;D_1__Bacteroidetes;D_2__Bacteroidia;D_3__Bacteroidales;D_4__Porphyromonadaceae;D_5__Porphyromonas;D_6__Porphyromonas endodontalis	0	0	0	0	12	0	12	FALSE
D_0__Bacteria;D_1__Bacteroidetes;D_2__Bacteroidia;D_3__Bacteroidales;D_4__Porphyromonadaceae;D_5__Porphyromonas;D_6__Porphyromonas gingivalis TDC60	0	0	0	0	0	4	4	FALSE
D_0__Bacteria;D_1__Bacteroidetes;D_2__Bacteroidia;D_3__Bacteroidales;D_4__Porphyromonadaceae;D_5__Porphyromonas;D_6__Porphyromonas sp. oral taxon 278 str. W7784	0	0	0	0	14	12	26	FALSE
D_0__Bacteria;D_1__Bacteroidetes;D_2__Bacteroidia;D_3__Bacteroidales;D_4__Prevotellaceae;D_5__Alloprevotella;D_6__uncultured Bacteroidales bacterium	0	0	0	0	26	10	36	FALSE
D_0__Bacteria;D_1__Bacteroidetes;D_2__Bacteroidia;D_3__Bacteroidales;D_4__Prevotellaceae;D_5__Alloprevotella;D_6__uncultured Bacteroidetes bacterium	0	0	0	0	5	0	5	FALSE
D_0__Bacteria;D_1__Bacteroidetes;D_2__Bacteroidia;D_3__Bacteroidales;D_4__Prevotellaceae;D_5__Paraprevotella;D_6__gut metagenome	0	0	0	0	8	50	58	TRUE
D_0__Bacteria;D_1__Bacteroidetes;D_2__Bacteroidia;D_3__Bacteroidales;D_4__Prevotellaceae;D_5__Prevotella 7;D_6__Prevotella melaninogenica	0	0	0	0	27	0	27	FALSE
D_0__Bacteria;D_1__Bacteroidetes;D_2__Bacteroidia;D_3__Bacteroidales;D_4__Prevotellaceae;D_5__Prevotella 7;D_6__Prevotella sp. canine oral taxon 195	0	0	0	0	0	4	4	FALSE
D_0__Bacteria;D_1__Bacteroidetes;D_2__Bacteroidia;D_3__Bacteroidales;D_4__Prevotellaceae;D_5__Prevotella 7;__	0	0	0	0	22	0	22	FALSE
D_0__Bacteria;D_1__Bacteroidetes;D_2__Bacteroidia;D_3__Bacteroidales;D_4__Prevotellaceae;D_5__Prevotella 9;D_6__Prevotellaceae bacterium DJF_RP17	0	0	0	0	0	105	105	TRUE
D_0__Bacteria;D_1__Bacteroidetes;D_2__Bacteroidia;D_3__Bacteroidales;D_4__Prevotellaceae;D_5__Prevotella 9;__	0	0	0	0	22	0	22	FALSE
D_0__Bacteria;D_1__Bacteroidetes;D_2__Bacteroidia;D_3__Bacteroidales;D_4__Prevotellaceae;D_5__Prevotella;D_6__Prevotella sp. oral taxon 299 str. F0039	0	0	0	0	0	7	7	FALSE
D_0__Bacteria;D_1__Bacteroidetes;D_2__Bacteroidia;D_3__Bacteroidales;D_4__Prevotellaceae;D_5__Prevotellaceae UCG-001;D_6__uncultured Bacteroidales bacterium	0	0	0	0	5	0	5	FALSE
D_0__Bacteria;D_1__Bacteroidetes;D_2__Bacteroidia;D_3__Bacteroidales;D_4__Prevotellaceae;__;__	0	0	0	0	0	34	34	FALSE
D_0__Bacteria;D_1__Bacteroidetes;D_2__Bacteroidia;D_3__Bacteroidales;D_4__Prolixibacteraceae;D_5__Prolixibacter;__	5	0	135	0	0	0	140	TRUE
D_0__Bacteria;D_1__Bacteroidetes;D_2__Bacteroidia;D_3__Bacteroidales;D_4__Prolixibacteraceae;D_5__uncultured;D_6__uncultured Cytophagales bacterium	0	12	0	0	17	0	29	FALSE
D_0__Bacteria;D_1__Bacteroidetes;D_2__Bacteroidia;D_3__Bacteroidales;D_4__Prolixibacteraceae;__;__	0	0	0	49	128	0	177	TRUE
D_0__Bacteria;D_1__Bacteroidetes;D_2__Bacteroidia;D_3__Bacteroidales;D_4__Rikenellaceae;D_5__Alistipes;D_6__Alistipes finegoldii	0	0	0	0	29	0	29	FALSE
D_0__Bacteria;D_1__Bacteroidetes;D_2__Bacteroidia;D_3__Bacteroidales;D_4__Rikenellaceae;D_5__Alistipes;__	0	0	0	19	75	244	338	TRUE
D_0__Bacteria;D_1__Bacteroidetes;D_2__Bacteroidia;D_3__Bacteroidales;D_4__Rikenellaceae;D_5__DMER64;__	0	0	0	0	12	0	12	FALSE
D_0__Bacteria;D_1__Bacteroidetes;D_2__Bacteroidia;D_3__Bacteroidales;D_4__Rikenellaceae;__;__	0	0	0	0	42	12	54	TRUE
D_0__Bacteria;D_1__Bacteroidetes;D_2__Bacteroidia;D_3__Bacteroidales;D_4__SB-5;D_5__benzene mineralizing consortium clone SB-5;D_6__	0	0	0	25	0	19	44	FALSE
D_0__Bacteria;D_1__Bacteroidetes;D_2__Bacteroidia;D_3__Bacteroidales;D_4__SB-5;__;__	0	108	0	43	26	107	284	TRUE
D_0__Bacteria;D_1__Bacteroidetes;D_2__Bacteroidia;D_3__Bacteroidales;D_4__Tannerellaceae;D_5__Macellibacteroides;__	0	0	0	0	14	0	14	FALSE
D_0__Bacteria;D_1__Bacteroidetes;D_2__Bacteroidia;D_3__Bacteroidales;D_4__Tannerellaceae;D_5__Parabacteroides;D_6__Parabacteroides faecis	0	0	0	0	0	25	25	FALSE
D_0__Bacteria;D_1__Bacteroidetes;D_2__Bacteroidia;D_3__Bacteroidales;D_4__Tannerellaceae;D_5__Parabacteroides;D_6__Parabacteroides goldsteinii CL02T12C30	0	0	0	0	11	27	38	FALSE
D_0__Bacteria;D_1__Bacteroidetes;D_2__Bacteroidia;D_3__Bacteroidales;D_4__Tannerellaceae;D_5__Parabacteroides;__	0	0	0	25	81	189	295	TRUE
D_0__Bacteria;D_1__Bacteroidetes;D_2__Bacteroidia;D_3__Bacteroidales;__;__;__	158	121	0	275	1201	746	2501	TRUE
D_0__Bacteria;D_1__Bacteroidetes;D_2__Bacteroidia;D_3__Chitinophagales;D_4__Chitinophagaceae;D_5__Flavitalea;D_6__uncultured Flavitalea sp.	0	0	0	0	8	0	8	FALSE
D_0__Bacteria;D_1__Bacteroidetes;D_2__Bacteroidia;D_3__Chitinophagales;D_4__Chitinophagaceae;D_5__Parafilimonas;D_6__uncultured Sphingobacteriales bacterium	0	0	0	0	0	15	15	FALSE
D_0__Bacteria;D_1__Bacteroidetes;D_2__Bacteroidia;D_3__Chitinophagales;D_4__Chitinophagaceae;D_5__Sediminibacterium;__	0	0	0	0	0	14	14	FALSE
D_0__Bacteria;D_1__Bacteroidetes;D_2__Bacteroidia;D_3__Chitinophagales;D_4__Chitinophagaceae;D_5__Taibaiella;D_6__uncultured Bacteroidetes bacterium	0	0	0	0	0	9	9	FALSE
D_0__Bacteria;D_1__Bacteroidetes;D_2__Bacteroidia;D_3__Chitinophagales;D_4__Chitinophagaceae;D_5__uncultured;D_6__uncultured Ferruginibacter sp.	0	0	0	0	0	11	11	FALSE
D_0__Bacteria;D_1__Bacteroidetes;D_2__Bacteroidia;D_3__Chitinophagales;D_4__Chitinophagaceae;D_5__uncultured;D_6__uncultured Flavisolibacter sp.	0	0	0	0	0	13	13	FALSE
D_0__Bacteria;D_1__Bacteroidetes;D_2__Bacteroidia;D_3__Chitinophagales;D_4__Chitinophagaceae;D_5__uncultured;__	0	0	0	0	18	0	18	FALSE
D_0__Bacteria;D_1__Bacteroidetes;D_2__Bacteroidia;D_3__Chitinophagales;D_4__Chitinophagaceae;__;__	0	0	0	0	0	20	20	FALSE
D_0__Bacteria;D_1__Bacteroidetes;D_2__Bacteroidia;D_3__Chitinophagales;D_4__Saprospiraceae;D_5__Lewinella;D_6__Cladosiphon okamuranus	0	0	0	6	5	0	11	FALSE
D_0__Bacteria;D_1__Bacteroidetes;D_2__Bacteroidia;D_3__Chitinophagales;D_4__Saprospiraceae;D_5__Lewinella;__	0	0	110	0	25	0	135	TRUE
D_0__Bacteria;D_1__Bacteroidetes;D_2__Bacteroidia;D_3__Chitinophagales;D_4__Saprospiraceae;D_5__Phaeodactylibacter;D_6__uncultured Bacteroidetes bacterium	0	0	0	9	16	0	25	FALSE
D_0__Bacteria;D_1__Bacteroidetes;D_2__Bacteroidia;D_3__Chitinophagales;D_4__Saprospiraceae;D_5__Phaeodactylibacter;D_6__uncultured Haliscomenobacter sp.	5	0	0	0	11	0	16	FALSE
D_0__Bacteria;D_1__Bacteroidetes;D_2__Bacteroidia;D_3__Chitinophagales;D_4__Saprospiraceae;D_5__Phaeodactylibacter;D_6__uncultured Sphingobacteriales bacterium	0	0	94	0	0	0	94	TRUE
D_0__Bacteria;D_1__Bacteroidetes;D_2__Bacteroidia;D_3__Chitinophagales;D_4__Saprospiraceae;D_5__uncultured;D_6__Saccharina japonica	0	0	0	0	12	0	12	FALSE
D_0__Bacteria;D_1__Bacteroidetes;D_2__Bacteroidia;D_3__Chitinophagales;D_4__Saprospiraceae;D_5__uncultured;D_6__bacterium YC-LK-LKJ25	7	0	74	0	0	0	81	TRUE
D_0__Bacteria;D_1__Bacteroidetes;D_2__Bacteroidia;D_3__Chitinophagales;D_4__Saprospiraceae;D_5__uncultured;D_6__uncultured Sphingobacteriales bacterium	0	0	0	19	33	0	52	TRUE
D_0__Bacteria;D_1__Bacteroidetes;D_2__Bacteroidia;D_3__Chitinophagales;D_4__Saprospiraceae;__;__	40	46	146	28	67	6	333	TRUE
D_0__Bacteria;D_1__Bacteroidetes;D_2__Bacteroidia;D_3__Chitinophagales;__;__;__	0	0	48	0	0	0	48	FALSE
D_0__Bacteria;D_1__Bacteroidetes;D_2__Bacteroidia;D_3__Cytophagales;D_4__Cyclobacteriaceae;D_5__Algoriphagus;D_6__Algoriphagus hitonicola	0	0	0	0	6	0	6	FALSE
D_0__Bacteria;D_1__Bacteroidetes;D_2__Bacteroidia;D_3__Cytophagales;D_4__Cyclobacteriaceae;D_5__Algoriphagus;__	0	8	0	0	0	0	8	FALSE
D_0__Bacteria;D_1__Bacteroidetes;D_2__Bacteroidia;D_3__Cytophagales;D_4__Cyclobacteriaceae;D_5__Cesiribacter;D_6__Flammeovirgaceae bacterium 311	0	0	0	0	3	0	3	FALSE
D_0__Bacteria;D_1__Bacteroidetes;D_2__Bacteroidia;D_3__Cytophagales;D_4__Cyclobacteriaceae;D_5__Fabibacter;__	124	0	0	0	0	0	124	TRUE
D_0__Bacteria;D_1__Bacteroidetes;D_2__Bacteroidia;D_3__Cytophagales;D_4__Cyclobacteriaceae;D_5__Flammeovirgaceae bacterium GY-1;D_6__	0	0	130	0	0	0	130	TRUE
D_0__Bacteria;D_1__Bacteroidetes;D_2__Bacteroidia;D_3__Cytophagales;D_4__Cyclobacteriaceae;D_5__uncultured;D_6__uncultured Bacteroidetes/Chlorobi group bacterium	0	28	0	0	0	0	28	FALSE
D_0__Bacteria;D_1__Bacteroidetes;D_2__Bacteroidia;D_3__Cytophagales;D_4__Cyclobacteriaceae;D_5__uncultured;D_6__uncultured Sphingobacteriia bacterium	0	0	0	0	15	0	15	FALSE
D_0__Bacteria;D_1__Bacteroidetes;D_2__Bacteroidia;D_3__Cytophagales;D_4__Cyclobacteriaceae;D_5__uncultured;__	0	0	0	8	0	0	8	FALSE
D_0__Bacteria;D_1__Bacteroidetes;D_2__Bacteroidia;D_3__Cytophagales;D_4__Cyclobacteriaceae;__;__	29	0	467	22	0	35	553	TRUE
D_0__Bacteria;D_1__Bacteroidetes;D_2__Bacteroidia;D_3__Cytophagales;D_4__Flammeovirgaceae;D_5__Luteivirga;D_6__uncultured Bacteroidetes bacterium	0	2	0	0	0	0	2	FALSE
D_0__Bacteria;D_1__Bacteroidetes;D_2__Bacteroidia;D_3__Cytophagales;D_4__Microscillaceae;__;__	0	0	0	0	0	7	7	FALSE
D_0__Bacteria;D_1__Bacteroidetes;D_2__Bacteroidia;D_3__Cytophagales;D_4__Spirosomaceae;D_5__Dyadobacter;D_6__Dyadobacter beijingensis DSM 21582	0	0	0	0	0	10	10	FALSE
D_0__Bacteria;D_1__Bacteroidetes;D_2__Bacteroidia;D_3__Cytophagales;__;__;__	12	218	67	125	234	34	690	TRUE
D_0__Bacteria;D_1__Bacteroidetes;D_2__Bacteroidia;D_3__Flavobacteriales;D_4__Crocinitomicaceae;D_5__Salinirepens;D_6__uncultured marine bacterium	0	0	0	0	0	3	3	FALSE
D_0__Bacteria;D_1__Bacteroidetes;D_2__Bacteroidia;D_3__Flavobacteriales;D_4__Cryomorphaceae;D_5__Owenweeksia;D_6__uncultured Flavobacteriales bacterium	0	0	0	0	5	0	5	FALSE
D_0__Bacteria;D_1__Bacteroidetes;D_2__Bacteroidia;D_3__Flavobacteriales;D_4__Cryomorphaceae;D_5__uncultured;D_6__uncultured Flavobacteriia bacterium	0	0	0	14	8	7	29	FALSE
D_0__Bacteria;D_1__Bacteroidetes;D_2__Bacteroidia;D_3__Flavobacteriales;D_4__Flavobacteriaceae;D_5__Actibacter;__	0	97	0	11	34	6	148	TRUE
D_0__Bacteria;D_1__Bacteroidetes;D_2__Bacteroidia;D_3__Flavobacteriales;D_4__Flavobacteriaceae;D_5__Aequorivita;D_6__uncultured Flavobacteriaceae bacterium	0	10	0	0	0	0	10	FALSE
D_0__Bacteria;D_1__Bacteroidetes;D_2__Bacteroidia;D_3__Flavobacteriales;D_4__Flavobacteriaceae;D_5__Gramella;D_6__uncultured bacterium	0	0	0	0	7	0	7	FALSE
D_0__Bacteria;D_1__Bacteroidetes;D_2__Bacteroidia;D_3__Flavobacteriales;D_4__Flavobacteriaceae;D_5__Leeuwenhoekiella;__	0	657	0	0	0	0	657	TRUE
D_0__Bacteria;D_1__Bacteroidetes;D_2__Bacteroidia;D_3__Flavobacteriales;D_4__Flavobacteriaceae;D_5__Mangrovimonas;D_6__Mangrovimonas sp. TPBH4	0	0	114	0	0	0	114	TRUE
D_0__Bacteria;D_1__Bacteroidetes;D_2__Bacteroidia;D_3__Flavobacteriales;D_4__Flavobacteriaceae;D_5__Muriicola;D_6__Muriicola marianensis	0	0	22	0	0	0	22	FALSE
D_0__Bacteria;D_1__Bacteroidetes;D_2__Bacteroidia;D_3__Flavobacteriales;D_4__Flavobacteriaceae;D_5__Muriicola;__	0	33	0	0	0	0	33	FALSE
D_0__Bacteria;D_1__Bacteroidetes;D_2__Bacteroidia;D_3__Flavobacteriales;D_4__Flavobacteriaceae;D_5__Myroides;__	0	0	0	0	0	3	3	FALSE
D_0__Bacteria;D_1__Bacteroidetes;D_2__Bacteroidia;D_3__Flavobacteriales;D_4__Flavobacteriaceae;D_5__NS5 marine group;D_6__hydrothermal vent metagenome	0	0	0	0	6	0	6	FALSE
D_0__Bacteria;D_1__Bacteroidetes;D_2__Bacteroidia;D_3__Flavobacteriales;D_4__Flavobacteriaceae;D_5__Pustulibacterium;D_6__Pustulibacterium marinum	0	0	0	0	30	0	30	FALSE
D_0__Bacteria;D_1__Bacteroidetes;D_2__Bacteroidia;D_3__Flavobacteriales;D_4__Flavobacteriaceae;D_5__Robertkochia;D_6__Robertkochia marina	0	0	0	17	27	0	44	FALSE
D_0__Bacteria;D_1__Bacteroidetes;D_2__Bacteroidia;D_3__Flavobacteriales;D_4__Flavobacteriaceae;D_5__Robiginitalea;D_6__Robiginitalea biformata HTCC2501	0	0	0	38	64	19	121	TRUE
D_0__Bacteria;D_1__Bacteroidetes;D_2__Bacteroidia;D_3__Flavobacteriales;D_4__Flavobacteriaceae;D_5__Robiginitalea;D_6__bacterium AMSU	0	0	0	10	0	0	10	FALSE
D_0__Bacteria;D_1__Bacteroidetes;D_2__Bacteroidia;D_3__Flavobacteriales;D_4__Flavobacteriaceae;D_5__Robiginitalea;D_6__uncultured organism	0	0	0	0	17	0	17	FALSE
D_0__Bacteria;D_1__Bacteroidetes;D_2__Bacteroidia;D_3__Flavobacteriales;D_4__Flavobacteriaceae;D_5__Robiginitalea;__	98	526	241	0	0	0	865	TRUE
D_0__Bacteria;D_1__Bacteroidetes;D_2__Bacteroidia;D_3__Flavobacteriales;D_4__Flavobacteriaceae;D_5__Ulvibacter;D_6__marine metagenome	0	0	0	0	0	4	4	FALSE
D_0__Bacteria;D_1__Bacteroidetes;D_2__Bacteroidia;D_3__Flavobacteriales;D_4__Flavobacteriaceae;__;__	136	138	1632	0	54	0	1960	TRUE
D_0__Bacteria;D_1__Bacteroidetes;D_2__Bacteroidia;D_3__Flavobacteriales;D_4__Weeksellaceae;D_5__Moheibacter;__	0	0	0	0	5	0	5	FALSE
D_0__Bacteria;D_1__Bacteroidetes;D_2__Bacteroidia;D_3__Flavobacteriales;D_4__Weeksellaceae;__;__	0	0	0	0	15	12	27	FALSE
D_0__Bacteria;D_1__Bacteroidetes;D_2__Bacteroidia;D_3__Flavobacteriales;__;__;__	0	5	8	13	0	0	26	FALSE
D_0__Bacteria;D_1__Bacteroidetes;D_2__Bacteroidia;D_3__Sphingobacteriales;D_4__CWT CU03-E12;D_5__uncultured Bacteroidetes bacterium;D_6__	0	0	0	53	62	90	205	TRUE
D_0__Bacteria;D_1__Bacteroidetes;D_2__Bacteroidia;D_3__Sphingobacteriales;D_4__Lentimicrobiaceae;D_5__anaerobic digester metagenome;D_6__	0	0	0	0	2	0	2	FALSE
D_0__Bacteria;D_1__Bacteroidetes;D_2__Bacteroidia;D_3__Sphingobacteriales;D_4__Lentimicrobiaceae;D_5__uncultured Sphingobacteriales bacterium;D_6__	0	0	0	0	0	6	6	FALSE
D_0__Bacteria;D_1__Bacteroidetes;D_2__Bacteroidia;D_3__Sphingobacteriales;D_4__Lentimicrobiaceae;D_5__uncultured Sphingobacteriia bacterium;D_6__	0	0	0	0	12	0	12	FALSE
D_0__Bacteria;D_1__Bacteroidetes;D_2__Bacteroidia;D_3__Sphingobacteriales;D_4__Lentimicrobiaceae;D_5__uncultured prokaryote;D_6__	0	0	0	0	39	0	39	FALSE
D_0__Bacteria;D_1__Bacteroidetes;D_2__Bacteroidia;D_3__Sphingobacteriales;D_4__Lentimicrobiaceae;__;__	0	20	10	28	33	48	139	TRUE
D_0__Bacteria;D_1__Bacteroidetes;D_2__Bacteroidia;D_3__Sphingobacteriales;D_4__ST-12K33;D_5__metagenome;D_6__	0	0	0	0	4	0	4	FALSE
D_0__Bacteria;D_1__Bacteroidetes;D_2__Bacteroidia;D_3__Sphingobacteriales;D_4__Sphingobacteriaceae;D_5__Mucilaginibacter;__	0	0	0	0	17	0	17	FALSE
D_0__Bacteria;D_1__Bacteroidetes;D_2__Bacteroidia;D_3__Sphingobacteriales;D_4__Sphingobacteriaceae;D_5__Sphingobacterium;__	0	0	0	0	13	0	13	FALSE
D_0__Bacteria;D_1__Bacteroidetes;D_2__Bacteroidia;D_3__Sphingobacteriales;D_4__Sphingobacteriaceae;__;__	0	0	0	0	25	11	36	FALSE
D_0__Bacteria;D_1__Bacteroidetes;D_2__Bacteroidia;D_3__Sphingobacteriales;__;__;__	0	5	0	26	30	0	61	TRUE
D_0__Bacteria;D_1__Bacteroidetes;D_2__Bacteroidia;__;__;__;__	147	312	202	1092	1657	1589	4999	TRUE
D_0__Bacteria;D_1__Bacteroidetes;D_2__Ignavibacteria;D_3__Ignavibacteriales;D_4__Ignavibacteriaceae;D_5__Ignavibacterium;D_6__Ignavibacterium album JCM 16511	41	0	0	52	201	36	330	TRUE
D_0__Bacteria;D_1__Bacteroidetes;D_2__Ignavibacteria;D_3__Ignavibacteriales;D_4__Ignavibacteriaceae;D_5__Ignavibacterium;D_6__uncultured Bacteroidetes bacterium	0	0	0	75	58	58	191	TRUE
D_0__Bacteria;D_1__Bacteroidetes;D_2__Ignavibacteria;D_3__Ignavibacteriales;D_4__Ignavibacteriaceae;D_5__Ignavibacterium;D_6__uncultured Chlorobi bacterium	0	0	0	4	0	0	4	FALSE
D_0__Bacteria;D_1__Bacteroidetes;D_2__Ignavibacteria;D_3__Ignavibacteriales;D_4__Ignavibacteriaceae;D_5__Ignavibacterium;D_6__uncultured Ignavibacterium sp.	0	0	0	0	8	0	8	FALSE
D_0__Bacteria;D_1__Bacteroidetes;D_2__Ignavibacteria;D_3__Ignavibacteriales;D_4__LD-RB-34;D_5__Ignavibacteria bacterium RIFOXYB12_FULL_35_14;D_6__	0	0	0	0	4	9	13	FALSE
D_0__Bacteria;D_1__Bacteroidetes;D_2__Ignavibacteria;D_3__Ignavibacteriales;D_4__PHOS-HE36;D_5__uncultured bacterium W5-47b;D_6__	0	0	0	0	27	0	27	FALSE
D_0__Bacteria;D_1__Bacteroidetes;D_2__Ignavibacteria;D_3__Ignavibacteriales;D_4__PHOS-HE36;__;__	0	0	0	0	30	0	30	FALSE
D_0__Bacteria;D_1__Bacteroidetes;D_2__Ignavibacteria;D_3__Ignavibacteriales;__;__;__	93	120	65	138	201	184	801	TRUE
D_0__Bacteria;D_1__Bacteroidetes;D_2__Ignavibacteria;D_3__Kryptoniales;D_4__BSV26;D_5__Ignavibacteria bacterium RIFCSPLOWO2_12_FULL_56_21;D_6__	0	0	0	91	114	185	390	TRUE
D_0__Bacteria;D_1__Bacteroidetes;D_2__Ignavibacteria;D_3__Kryptoniales;D_4__BSV26;D_5__denitrifying bacterium enrichment culture clone NOA_1_E9;D_6__	0	0	0	33	78	78	189	TRUE
D_0__Bacteria;D_1__Bacteroidetes;D_2__Ignavibacteria;D_3__Kryptoniales;D_4__BSV26;D_5__metagenome;D_6__	0	0	0	0	0	16	16	FALSE
D_0__Bacteria;D_1__Bacteroidetes;D_2__Ignavibacteria;D_3__Kryptoniales;D_4__BSV26;D_5__uncultured Bacteroidetes bacterium;D_6__	0	0	0	105	86	119	310	TRUE
D_0__Bacteria;D_1__Bacteroidetes;D_2__Ignavibacteria;D_3__Kryptoniales;D_4__BSV26;D_5__uncultured green sulfur bacterium GR-296.II.73;D_6__	0	0	0	173	238	244	655	TRUE
D_0__Bacteria;D_1__Bacteroidetes;D_2__Ignavibacteria;D_3__Kryptoniales;D_4__BSV26;D_5__uncultured prokaryote;D_6__	0	0	0	0	10	15	25	FALSE
D_0__Bacteria;D_1__Bacteroidetes;D_2__Ignavibacteria;D_3__Kryptoniales;D_4__BSV26;D_5__uncultured soil bacterium;D_6__	0	0	0	168	117	173	458	TRUE
D_0__Bacteria;D_1__Bacteroidetes;D_2__Ignavibacteria;D_3__Kryptoniales;D_4__BSV26;__;__	97	121	8	293	244	341	1104	TRUE
D_0__Bacteria;D_1__Bacteroidetes;D_2__Ignavibacteria;D_3__Kryptoniales;D_4__MSB-3C8;D_5__uncultured Chloroflexi bacterium;D_6__	0	0	0	0	7	0	7	FALSE
D_0__Bacteria;D_1__Bacteroidetes;D_2__Ignavibacteria;D_3__Kryptoniales;D_4__MSB-3C8;D_5__uncultured Ignavibacteriales bacterium;D_6__	0	0	0	81	71	85	237	TRUE
D_0__Bacteria;D_1__Bacteroidetes;D_2__Ignavibacteria;D_3__Kryptoniales;D_4__MSB-3C8;__;__	0	0	0	67	65	59	191	TRUE
D_0__Bacteria;D_1__Bacteroidetes;D_2__Ignavibacteria;D_3__Kryptoniales;__;__;__	0	0	0	89	117	64	270	TRUE
D_0__Bacteria;D_1__Bacteroidetes;D_2__Ignavibacteria;D_3__OPB56;D_4__uncultured Chlorobiales bacterium;D_5__;D_6__	0	0	0	0	11	0	11	FALSE
D_0__Bacteria;D_1__Bacteroidetes;D_2__Ignavibacteria;D_3__OPB56;D_4__uncultured prokaryote;D_5__;D_6__	0	0	0	8	3	0	11	FALSE
D_0__Bacteria;D_1__Bacteroidetes;D_2__Ignavibacteria;D_3__OPB56;__;__;__	0	0	0	5	12	25	42	FALSE
D_0__Bacteria;D_1__Bacteroidetes;D_2__Ignavibacteria;D_3__SJA-28;D_4__uncultured Bacteroidetes bacterium;D_5__;D_6__	0	0	0	99	105	129	333	TRUE
D_0__Bacteria;D_1__Bacteroidetes;D_2__Ignavibacteria;D_3__SJA-28;__;__;__	0	0	0	35	36	32	103	TRUE
D_0__Bacteria;D_1__Bacteroidetes;D_2__Ignavibacteria;__;__;__;__	0	52	0	122	138	146	458	TRUE
D_0__Bacteria;D_1__Bacteroidetes;D_2__Rhodothermia;D_3__Rhodothermales;D_4__Rhodothermaceae;D_5__uncultured;D_6__uncultured Bacteroidales bacterium	0	0	81	0	0	0	81	TRUE
D_0__Bacteria;D_1__Bacteroidetes;D_2__Rhodothermia;D_3__Rhodothermales;D_4__Rhodothermaceae;D_5__uncultured;D_6__uncultured Sphingobacteriales bacterium	0	0	48	0	0	0	48	FALSE
D_0__Bacteria;D_1__Bacteroidetes;D_2__Rhodothermia;D_3__Rhodothermales;D_4__Rhodothermaceae;D_5__uncultured;D_6__uncultured organism	0	0	0	9	14	0	23	FALSE
D_0__Bacteria;D_1__Bacteroidetes;D_2__Rhodothermia;D_3__Rhodothermales;D_4__Rhodothermaceae;D_5__uncultured;__	0	0	97	0	0	0	97	TRUE
D_0__Bacteria;D_1__Bacteroidetes;__;__;__;__;__	0	0	0	231	244	228	703	TRUE
D_0__Bacteria;D_1__Calditrichaeota;D_2__Calditrichia;D_3__Calditrichales;D_4__Calditrichaceae;D_5__Caldithrix;D_6__Caldithrix palaeochoryensis	0	0	0	0	22	0	22	FALSE
D_0__Bacteria;D_1__Calditrichaeota;D_2__Calditrichia;D_3__Calditrichales;D_4__Calditrichaceae;D_5__Caldithrix;D_6__uncultured Deferribacteres bacterium	0	0	0	156	206	183	545	TRUE
D_0__Bacteria;D_1__Calditrichaeota;D_2__Calditrichia;D_3__Calditrichales;D_4__Calditrichaceae;D_5__Caldithrix;D_6__uncultured delta proteobacterium	165	0	0	25	51	23	264	TRUE
D_0__Bacteria;D_1__Calditrichaeota;D_2__Calditrichia;D_3__Calditrichales;D_4__Calditrichaceae;D_5__Caldithrix;__	0	0	0	0	13	0	13	FALSE
D_0__Bacteria;D_1__Calditrichaeota;D_2__Calditrichia;D_3__Calditrichales;D_4__Calditrichaceae;D_5__Calorithrix;D_6__bacterium enrichment culture clone Anammox_9	0	0	0	14	0	0	14	FALSE
D_0__Bacteria;D_1__Calditrichaeota;D_2__Calditrichia;D_3__Calditrichales;D_4__Calditrichaceae;D_5__Calorithrix;D_6__uncultured Deferribacteres bacterium	0	0	0	36	49	27	112	TRUE
D_0__Bacteria;D_1__Calditrichaeota;D_2__Calditrichia;D_3__Calditrichales;D_4__Calditrichaceae;D_5__Calorithrix;D_6__uncultured bacterium UASB_TL17	0	0	0	104	152	87	343	TRUE
D_0__Bacteria;D_1__Calditrichaeota;D_2__Calditrichia;D_3__Calditrichales;D_4__Calditrichaceae;D_5__Calorithrix;D_6__uncultured organism	0	0	10	16	18	14	58	TRUE
D_0__Bacteria;D_1__Calditrichaeota;D_2__Calditrichia;D_3__Calditrichales;D_4__Calditrichaceae;D_5__Calorithrix;__	0	0	0	74	81	64	219	TRUE
D_0__Bacteria;D_1__Calditrichaeota;D_2__Calditrichia;D_3__Calditrichales;D_4__Calditrichaceae;D_5__SM23-31;D_6__bacterium SM23_31	0	0	0	0	3	0	3	FALSE
D_0__Bacteria;D_1__Calditrichaeota;D_2__Calditrichia;D_3__Calditrichales;D_4__Calditrichaceae;D_5__saltmarsh clone LCP-26;D_6__	0	0	0	461	576	404	1441	TRUE
D_0__Bacteria;D_1__Calditrichaeota;D_2__Calditrichia;D_3__Calditrichales;D_4__Calditrichaceae;D_5__uncultured sediment bacterium;D_6__	0	0	0	23	32	32	87	TRUE
D_0__Bacteria;D_1__Calditrichaeota;D_2__Calditrichia;D_3__Calditrichales;D_4__Calditrichaceae;__;__	253	237	236	115	173	160	1174	TRUE
D_0__Bacteria;D_1__Chlamydiae;D_2__Chlamydiae;D_3__Chlamydiales;D_4__Criblamydiaceae;D_5__metagenome;D_6__	0	28	0	0	0	0	28	FALSE
D_0__Bacteria;D_1__Chlamydiae;D_2__Chlamydiae;D_3__Chlamydiales;D_4__Criblamydiaceae;__;__	2	0	0	0	0	0	2	FALSE
D_0__Bacteria;D_1__Chlamydiae;D_2__Chlamydiae;D_3__Chlamydiales;D_4__Parachlamydiaceae;__;__	0	0	4	0	0	0	4	FALSE
D_0__Bacteria;D_1__Chlamydiae;D_2__Chlamydiae;D_3__Chlamydiales;D_4__Simkaniaceae;__;__	0	0	0	58	28	39	125	TRUE
D_0__Bacteria;D_1__Chlamydiae;D_2__Chlamydiae;D_3__Chlamydiales;D_4__cvE6;D_5__Chlamydiales bacterium NS11;D_6__	0	0	0	0	0	49	49	FALSE
D_0__Bacteria;D_1__Chlamydiae;D_2__Chlamydiae;D_3__Chlamydiales;D_4__cvE6;__;__	0	0	20	0	62	61	143	TRUE
D_0__Bacteria;D_1__Chlamydiae;D_2__Chlamydiae;D_3__Chlamydiales;__;__;__	3	2	0	36	32	37	110	TRUE
D_0__Bacteria;D_1__Chloroflexi;D_2__AD3;D_3__uncultured Chloroflexi bacterium;D_4__;D_5__;D_6__	0	0	0	0	0	19	19	FALSE
D_0__Bacteria;D_1__Chloroflexi;D_2__AD3;D_3__uncultured soil bacterium;D_4__;D_5__;D_6__	0	0	0	0	20	0	20	FALSE
D_0__Bacteria;D_1__Chloroflexi;D_2__Anaerolineae;D_3__ADurb.Bin180;D_4__Chloroflexi bacterium ADurb.Bin180;D_5__;D_6__	0	0	0	0	21	26	47	FALSE
D_0__Bacteria;D_1__Chloroflexi;D_2__Anaerolineae;D_3__Anaerolineales;D_4__Anaerolineaceae;D_5__Anaerolinea;D_6__Thermobaculum sp. enrichment culture clone VanCtr100	0	0	0	0	14	0	14	FALSE
D_0__Bacteria;D_1__Chloroflexi;D_2__Anaerolineae;D_3__Anaerolineales;D_4__Anaerolineaceae;D_5__Anaerolinea;D_6__uncultured bacterium SHA-28	0	0	0	70	34	54	158	TRUE
D_0__Bacteria;D_1__Chloroflexi;D_2__Anaerolineae;D_3__Anaerolineales;D_4__Anaerolineaceae;D_5__Leptolinea;D_6__Leptolinea tardivitalis	0	0	0	43	30	34	107	TRUE
D_0__Bacteria;D_1__Chloroflexi;D_2__Anaerolineae;D_3__Anaerolineales;D_4__Anaerolineaceae;D_5__Leptolinea;D_6__uncultured bacterium SJA-116	0	0	0	21	0	22	43	FALSE
D_0__Bacteria;D_1__Chloroflexi;D_2__Anaerolineae;D_3__Anaerolineales;D_4__Anaerolineaceae;D_5__Leptolinea;__	0	0	0	35	18	48	101	TRUE
D_0__Bacteria;D_1__Chloroflexi;D_2__Anaerolineae;D_3__Anaerolineales;D_4__Anaerolineaceae;D_5__Levilinea;D_6__bacterium enrichment culture clone MB2_17	0	0	0	241	269	229	739	TRUE
D_0__Bacteria;D_1__Chloroflexi;D_2__Anaerolineae;D_3__Anaerolineales;D_4__Anaerolineaceae;D_5__Ornatilinea;D_6__Ornatilinea apprima	0	0	0	10	0	0	10	FALSE
D_0__Bacteria;D_1__Chloroflexi;D_2__Anaerolineae;D_3__Anaerolineales;D_4__Anaerolineaceae;D_5__Thermomarinilinea;D_6__marine metagenome	0	0	0	10	41	0	51	TRUE
D_0__Bacteria;D_1__Chloroflexi;D_2__Anaerolineae;D_3__Anaerolineales;D_4__Anaerolineaceae;D_5__Thermomarinilinea;__	0	112	15	0	0	0	127	TRUE
D_0__Bacteria;D_1__Chloroflexi;D_2__Anaerolineae;D_3__Anaerolineales;D_4__Anaerolineaceae;D_5__UTCFX1;D_6__uncultured soil bacterium	0	0	0	0	22	0	22	FALSE
D_0__Bacteria;D_1__Chloroflexi;D_2__Anaerolineae;D_3__Anaerolineales;D_4__Anaerolineaceae;D_5__UTCFX1;D_6__wastewater metagenome	0	0	0	55	62	36	153	TRUE
D_0__Bacteria;D_1__Chloroflexi;D_2__Anaerolineae;D_3__Anaerolineales;D_4__Anaerolineaceae;D_5__UTCFX1;__	0	0	0	19	20	23	62	TRUE
D_0__Bacteria;D_1__Chloroflexi;D_2__Anaerolineae;D_3__Anaerolineales;D_4__Anaerolineaceae;D_5__uncultured;D_6__benzene mineralizing consortium clone SB-34	0	0	0	143	152	78	373	TRUE
D_0__Bacteria;D_1__Chloroflexi;D_2__Anaerolineae;D_3__Anaerolineales;D_4__Anaerolineaceae;D_5__uncultured;D_6__uncultured Bellilinea sp.	0	0	0	99	90	136	325	TRUE
D_0__Bacteria;D_1__Chloroflexi;D_2__Anaerolineae;D_3__Anaerolineales;D_4__Anaerolineaceae;D_5__uncultured;D_6__uncultured Chlorobi bacterium	0	58	637	0	33	0	728	TRUE
D_0__Bacteria;D_1__Chloroflexi;D_2__Anaerolineae;D_3__Anaerolineales;D_4__Anaerolineaceae;D_5__uncultured;D_6__uncultured bacterium UASB_TL84	0	0	0	126	108	76	310	TRUE
D_0__Bacteria;D_1__Chloroflexi;D_2__Anaerolineae;D_3__Anaerolineales;D_4__Anaerolineaceae;D_5__uncultured;D_6__uncultured hydrocarbon seep bacterium GCA004	0	0	368	62	51	33	514	TRUE
D_0__Bacteria;D_1__Chloroflexi;D_2__Anaerolineae;D_3__Anaerolineales;D_4__Anaerolineaceae;D_5__uncultured;D_6__uncultured hydrocarbon seep bacterium GCA112	0	0	0	0	26	19	45	FALSE
D_0__Bacteria;D_1__Chloroflexi;D_2__Anaerolineae;D_3__Anaerolineales;D_4__Anaerolineaceae;D_5__uncultured;D_6__uncultured marine bacterium	282	571	191	43	55	17	1159	TRUE
D_0__Bacteria;D_1__Chloroflexi;D_2__Anaerolineae;D_3__Anaerolineales;D_4__Anaerolineaceae;D_5__uncultured;D_6__uncultured sludge bacterium H39	0	0	0	0	0	8	8	FALSE
D_0__Bacteria;D_1__Chloroflexi;D_2__Anaerolineae;D_3__Anaerolineales;D_4__Anaerolineaceae;D_5__uncultured;__	24	0	0	863	665	524	2076	TRUE
D_0__Bacteria;D_1__Chloroflexi;D_2__Anaerolineae;D_3__Anaerolineales;D_4__Anaerolineaceae;__;__	1424	2663	1359	2822	3201	2186	13655	TRUE
D_0__Bacteria;D_1__Chloroflexi;D_2__Anaerolineae;D_3__Ardenticatenales;D_4__uncultured;D_5__bacterium YC-LK-LKJ38;D_6__	0	17	0	40	51	84	192	TRUE
D_0__Bacteria;D_1__Chloroflexi;D_2__Anaerolineae;D_3__Ardenticatenales;D_4__uncultured;D_5__bacterium YC-ZSS-LKJ68;D_6__	0	0	88	0	0	0	88	TRUE
D_0__Bacteria;D_1__Chloroflexi;D_2__Anaerolineae;D_3__Ardenticatenales;D_4__uncultured;D_5__uncultured Ardenticatenia bacterium;D_6__	249	14	66	0	13	0	342	TRUE
D_0__Bacteria;D_1__Chloroflexi;D_2__Anaerolineae;D_3__Ardenticatenales;D_4__uncultured;__;__	0	0	0	24	15	0	39	FALSE
D_0__Bacteria;D_1__Chloroflexi;D_2__Anaerolineae;D_3__Caldilineales;D_4__Caldilineaceae;D_5__uncultured;D_6__anaerobic digester metagenome	0	46	0	0	0	0	46	FALSE
D_0__Bacteria;D_1__Chloroflexi;D_2__Anaerolineae;D_3__Caldilineales;D_4__Caldilineaceae;D_5__uncultured;__	71	0	0	0	0	0	71	TRUE
D_0__Bacteria;D_1__Chloroflexi;D_2__Anaerolineae;D_3__Caldilineales;D_4__Caldilineaceae;__;__	131	442	343	0	0	0	916	TRUE
D_0__Bacteria;D_1__Chloroflexi;D_2__Anaerolineae;D_3__KZNMV-5-B42;D_4__uncultured organism;D_5__;D_6__	7	10	0	0	0	0	17	FALSE
D_0__Bacteria;D_1__Chloroflexi;D_2__Anaerolineae;D_3__MSB-5B2;D_4__uncultured Chloroflexi bacterium;D_5__;D_6__	0	0	0	0	30	27	57	TRUE
D_0__Bacteria;D_1__Chloroflexi;D_2__Anaerolineae;D_3__MSB-5B2;D_4__uncultured organism;D_5__;D_6__	0	0	19	0	0	0	19	FALSE
D_0__Bacteria;D_1__Chloroflexi;D_2__Anaerolineae;D_3__MSB-5B2;__;__;__	137	0	0	0	0	0	137	TRUE
D_0__Bacteria;D_1__Chloroflexi;D_2__Anaerolineae;D_3__MSB-5E12;D_4__Chloroflexi bacterium JGI 0000059-C09;D_5__;D_6__	0	0	0	132	71	116	319	TRUE
D_0__Bacteria;D_1__Chloroflexi;D_2__Anaerolineae;D_3__RBG-13-54-9;D_4__hot springs metagenome;D_5__;D_6__	0	0	0	534	278	392	1204	TRUE
D_0__Bacteria;D_1__Chloroflexi;D_2__Anaerolineae;D_3__RBG-13-54-9;D_4__uncultured Caldilineae bacterium;D_5__;D_6__	0	0	0	0	0	24	24	FALSE
D_0__Bacteria;D_1__Chloroflexi;D_2__Anaerolineae;D_3__RBG-13-54-9;D_4__uncultured bacterium SJA-35;D_5__;D_6__	0	0	0	4	0	9	13	FALSE
D_0__Bacteria;D_1__Chloroflexi;D_2__Anaerolineae;D_3__RBG-13-54-9;D_4__uncultured prokaryote;D_5__;D_6__	0	0	0	103	86	158	347	TRUE
D_0__Bacteria;D_1__Chloroflexi;D_2__Anaerolineae;D_3__RBG-13-54-9;__;__;__	0	0	0	27	23	12	62	TRUE
D_0__Bacteria;D_1__Chloroflexi;D_2__Anaerolineae;D_3__SBR1031;D_4__A4b;D_5__OLB13;__	0	0	22	26	18	35	101	TRUE
D_0__Bacteria;D_1__Chloroflexi;D_2__Anaerolineae;D_3__SBR1031;D_4__A4b;D_5__uncultured marine bacterium;D_6__	0	0	0	4	0	0	4	FALSE
D_0__Bacteria;D_1__Chloroflexi;D_2__Anaerolineae;D_3__SBR1031;D_4__A4b;__;__	0	0	0	4	0	10	14	FALSE
D_0__Bacteria;D_1__Chloroflexi;D_2__Anaerolineae;D_3__SBR1031;D_4__anaerobic bacterium MO-CFX2;D_5__;D_6__	0	0	0	114	86	0	200	TRUE
D_0__Bacteria;D_1__Chloroflexi;D_2__Anaerolineae;D_3__SBR1031;D_4__anaerobic digester metagenome;D_5__;D_6__	12	0	0	87	59	33	191	TRUE
D_0__Bacteria;D_1__Chloroflexi;D_2__Anaerolineae;D_3__SBR1031;D_4__bacterium YC-ZSS-LKJ145;D_5__;D_6__	4	60	100	0	0	0	164	TRUE
D_0__Bacteria;D_1__Chloroflexi;D_2__Anaerolineae;D_3__SBR1031;D_4__uncultured Anaerolineaceae bacterium;D_5__;D_6__	0	0	0	0	0	6	6	FALSE
D_0__Bacteria;D_1__Chloroflexi;D_2__Anaerolineae;D_3__SBR1031;D_4__uncultured Gemmatimonadetes bacterium;D_5__;D_6__	0	0	0	0	7	0	7	FALSE
D_0__Bacteria;D_1__Chloroflexi;D_2__Anaerolineae;D_3__SBR1031;D_4__uncultured planctomycete;D_5__;D_6__	0	0	0	32	0	0	32	FALSE
D_0__Bacteria;D_1__Chloroflexi;D_2__Anaerolineae;D_3__SBR1031;__;__;__	0	0	0	116	149	0	265	TRUE
D_0__Bacteria;D_1__Chloroflexi;D_2__Anaerolineae;D_3__Thermoflexales;D_4__Thermoflexaceae;D_5__Thermoflexus;D_6__uncultured Chloroflexaceae bacterium	63	0	40	0	0	0	103	TRUE
D_0__Bacteria;D_1__Chloroflexi;D_2__Anaerolineae;__;__;__;__	566	689	1909	1152	863	572	5751	TRUE
D_0__Bacteria;D_1__Chloroflexi;D_2__Dehalococcoidia;D_3__661239;D_4__Chloroflexi bacterium RBG_13_46_14;D_5__;D_6__	0	0	9	283	192	315	799	TRUE
D_0__Bacteria;D_1__Chloroflexi;D_2__Dehalococcoidia;D_3__661239;D_4__uncultured Chloroflexi bacterium;D_5__;D_6__	4	0	0	21	39	56	120	TRUE
D_0__Bacteria;D_1__Chloroflexi;D_2__Dehalococcoidia;D_3__661239;__;__;__	0	0	0	28	0	0	28	FALSE
D_0__Bacteria;D_1__Chloroflexi;D_2__Dehalococcoidia;D_3__Dehalococcoidales;D_4__Dehalococcoidaceae;D_5__Dehalococcoides;D_6__Dehalococcoides sp. UCH007	0	0	0	0	0	14	14	FALSE
D_0__Bacteria;D_1__Chloroflexi;D_2__Dehalococcoidia;D_3__Dehalococcoidales;D_4__Dehalococcoidaceae;D_5__Dehalogenimonas;__	0	0	0	79	50	61	190	TRUE
D_0__Bacteria;D_1__Chloroflexi;D_2__Dehalococcoidia;D_3__Dehalococcoidales;D_4__Dehalococcoidaceae;__;__	0	0	0	0	0	9	9	FALSE
D_0__Bacteria;D_1__Chloroflexi;D_2__Dehalococcoidia;D_3__Dehalococcoidales;D_4__Dehalococcoidales Incertae Sedis;D_5__Dehalobium;__	28	0	22	0	9	0	59	TRUE
D_0__Bacteria;D_1__Chloroflexi;D_2__Dehalococcoidia;D_3__Dehalococcoidales;D_4__uncultured;D_5__microbial mat metagenome;D_6__	0	0	0	35	0	27	62	TRUE
D_0__Bacteria;D_1__Chloroflexi;D_2__Dehalococcoidia;D_3__Dehalococcoidales;D_4__uncultured;D_5__uncultured Chloroflexi bacterium;D_6__	0	0	0	0	11	0	11	FALSE
D_0__Bacteria;D_1__Chloroflexi;D_2__Dehalococcoidia;D_3__Dehalococcoidales;D_4__uncultured;D_5__uncultured soil bacterium;D_6__	0	3	0	7	0	5	15	FALSE
D_0__Bacteria;D_1__Chloroflexi;D_2__Dehalococcoidia;D_3__Dehalococcoidales;__;__;__	0	0	0	14	7	0	21	FALSE
D_0__Bacteria;D_1__Chloroflexi;D_2__Dehalococcoidia;D_3__ER-E4-17;D_4__uncultured bacterium;D_5__;D_6__	0	0	0	34	32	55	121	TRUE
D_0__Bacteria;D_1__Chloroflexi;D_2__Dehalococcoidia;D_3__ER-E4-17;__;__;__	0	0	0	19	9	31	59	TRUE
D_0__Bacteria;D_1__Chloroflexi;D_2__Dehalococcoidia;D_3__FS117-23B-02;D_4__uncultured prokaryote;D_5__;D_6__	0	0	10	15	0	31	56	TRUE
D_0__Bacteria;D_1__Chloroflexi;D_2__Dehalococcoidia;D_3__FW22;D_4__uncultured Dehalogenimonas sp.;D_5__;D_6__	0	0	0	19	29	40	88	TRUE
D_0__Bacteria;D_1__Chloroflexi;D_2__Dehalococcoidia;D_3__FW22;D_4__uncultured organism;D_5__;D_6__	0	34	26	5	0	0	65	TRUE
D_0__Bacteria;D_1__Chloroflexi;D_2__Dehalococcoidia;D_3__GIF3;D_4__Dehalococcoidia bacterium SCGC AB-540-C11;D_5__;D_6__	0	0	0	1142	231	518	1891	TRUE
D_0__Bacteria;D_1__Chloroflexi;D_2__Dehalococcoidia;D_3__GIF3;D_4__uncultured Chlorobi bacterium;D_5__;D_6__	0	0	0	8	28	0	36	FALSE
D_0__Bacteria;D_1__Chloroflexi;D_2__Dehalococcoidia;D_3__GIF3;D_4__uncultured Chloroflexaceae bacterium;D_5__;D_6__	0	0	0	34	0	0	34	FALSE
D_0__Bacteria;D_1__Chloroflexi;D_2__Dehalococcoidia;D_3__GIF3;D_4__uncultured organism;D_5__;D_6__	0	0	0	10	0	0	10	FALSE
D_0__Bacteria;D_1__Chloroflexi;D_2__Dehalococcoidia;D_3__GIF3;__;__;__	0	0	0	60	36	52	148	TRUE
D_0__Bacteria;D_1__Chloroflexi;D_2__Dehalococcoidia;D_3__GIF9;D_4__AB-539-J10;D_5__SCGC-AB-539-J10;D_6__uncultured Chloroflexi bacterium	0	0	0	0	75	113	188	TRUE
D_0__Bacteria;D_1__Chloroflexi;D_2__Dehalococcoidia;D_3__GIF9;D_4__uncultured Chloroflexi bacterium;D_5__;D_6__	0	0	0	60	37	36	133	TRUE
D_0__Bacteria;D_1__Chloroflexi;D_2__Dehalococcoidia;D_3__GIF9;D_4__uncultured soil bacterium;D_5__;D_6__	0	13	0	6	22	7	48	FALSE
D_0__Bacteria;D_1__Chloroflexi;D_2__Dehalococcoidia;D_3__GIF9;__;__;__	0	0	0	17	0	0	17	FALSE
D_0__Bacteria;D_1__Chloroflexi;D_2__Dehalococcoidia;D_3__MSBL5;D_4__uncultured Dehalococcoides sp.;D_5__;D_6__	0	0	0	58	23	36	117	TRUE
D_0__Bacteria;D_1__Chloroflexi;D_2__Dehalococcoidia;D_3__RBG-13-46-9;D_4__Chloroflexi bacterium RBG_13_46_9;D_5__;D_6__	0	0	0	429	192	667	1288	TRUE
D_0__Bacteria;D_1__Chloroflexi;D_2__Dehalococcoidia;D_3__S085;D_4__marine sediment metagenome;D_5__;D_6__	0	47	160	0	0	0	207	TRUE
D_0__Bacteria;D_1__Chloroflexi;D_2__Dehalococcoidia;D_3__SAR202 clade;__;__;__	0	0	54	0	0	0	54	TRUE
D_0__Bacteria;D_1__Chloroflexi;D_2__Dehalococcoidia;D_3__Sh765B-AG-111;D_4__uncultured Chlorobi bacterium;D_5__;D_6__	0	0	0	10	20	0	30	FALSE
D_0__Bacteria;D_1__Chloroflexi;D_2__Dehalococcoidia;D_3__Sh765B-AG-111;D_4__uncultured Dehalococcoides sp.;D_5__;D_6__	0	0	0	42	36	104	182	TRUE
D_0__Bacteria;D_1__Chloroflexi;D_2__Dehalococcoidia;D_3__Sh765B-AG-111;__;__;__	0	0	0	0	10	0	10	FALSE
D_0__Bacteria;D_1__Chloroflexi;D_2__Dehalococcoidia;D_3__t0.6.f;D_4__uncultured eubacterium t0.6.f;D_5__;D_6__	2	31	0	399	160	333	925	TRUE
D_0__Bacteria;D_1__Chloroflexi;D_2__Dehalococcoidia;__;__;__;__	79	22	100	2457	1373	2664	6695	TRUE
D_0__Bacteria;D_1__Chloroflexi;D_2__KD4-96;D_3__bacterium Ellin6529;D_4__;D_5__;D_6__	430	0	0	0	0	0	430	TRUE
D_0__Bacteria;D_1__Chloroflexi;D_2__KD4-96;D_3__uncultured Anaerolineaceae bacterium;D_4__;D_5__;D_6__	0	13	180	16	15	18	242	TRUE
D_0__Bacteria;D_1__Chloroflexi;D_2__KD4-96;D_3__uncultured Longilinea sp.;D_4__;D_5__;D_6__	0	0	0	111	102	94	307	TRUE
D_0__Bacteria;D_1__Chloroflexi;D_2__KD4-96;__;__;__;__	0	845	602	0	0	0	1447	TRUE
D_0__Bacteria;D_1__Chloroflexi;D_2__Ktedonobacteria;D_3__Ktedonobacterales;D_4__JG30-KF-AS9;D_5__uncultured Thermosporothrix sp.;D_6__	0	0	0	0	3	0	3	FALSE
D_0__Bacteria;D_1__Chloroflexi;D_2__Ktedonobacteria;D_3__Ktedonobacterales;D_4__Ktedonobacteraceae;D_5__HSB OF53-F07;D_6__uncultured Chloroflexales bacterium	3	0	0	0	0	0	3	FALSE
D_0__Bacteria;D_1__Chloroflexi;D_2__SHA-26;D_3__uncultured soil bacterium;D_4__;D_5__;D_6__	0	0	0	28	12	12	52	TRUE
D_0__Bacteria;D_1__Chloroflexi;D_2__TK10;__;__;__;__	0	0	0	0	8	0	8	FALSE
D_0__Bacteria;D_1__Chloroflexi;__;__;__;__;__	0	107	0	601	192	292	1192	TRUE
D_0__Bacteria;D_1__Cyanobacteria;D_2__Melainabacteria;D_3__Gastranaerophilales;D_4__Candidatus Melainabacteria bacterium RIFOXYA2_FULL_32_9;D_5__;D_6__	0	0	5	0	0	0	5	FALSE
D_0__Bacteria;D_1__Cyanobacteria;D_2__Melainabacteria;D_3__Gastranaerophilales;D_4__uncultured Merismopedia sp.;D_5__;D_6__	0	83	0	0	0	0	83	TRUE
D_0__Bacteria;D_1__Cyanobacteria;D_2__Melainabacteria;D_3__Gastranaerophilales;__;__;__	102	0	81	0	0	0	183	TRUE
D_0__Bacteria;D_1__Cyanobacteria;D_2__Melainabacteria;D_3__Obscuribacterales;D_4__uncultured Clostridia bacterium;D_5__;D_6__	3	5	0	0	0	0	8	FALSE
D_0__Bacteria;D_1__Cyanobacteria;D_2__Oxyphotobacteria;D_3__Chloroplast;D_4__Withania somnifera;D_5__;D_6__	0	0	0	5	87	20	112	TRUE
D_0__Bacteria;D_1__Cyanobacteria;D_2__Oxyphotobacteria;D_3__Chloroplast;__;__;__	0	181	345	213	395	66	1200	TRUE
D_0__Bacteria;D_1__Cyanobacteria;D_2__Oxyphotobacteria;D_3__Nostocales;D_4__Coleofasciculaceae;D_5__Coleofasciculus PCC-7420;D_6__Coleofasciculus chthonoplastes PCC 7420	0	0	0	0	4	0	4	FALSE
D_0__Bacteria;D_1__Cyanobacteria;D_2__Oxyphotobacteria;D_3__Nostocales;D_4__Cyanobacteriaceae;__;__	0	12	0	10	17	0	39	FALSE
D_0__Bacteria;D_1__Cyanobacteria;D_2__Oxyphotobacteria;D_3__Nostocales;D_4__Microcystaceae;D_5__Cyanothece ATCC 51142 (UCYN-C);D_6__Cyanothece sp. CCY0110	0	0	0	0	11	0	11	FALSE
D_0__Bacteria;D_1__Cyanobacteria;D_2__Oxyphotobacteria;D_3__Nostocales;D_4__Xenococcaceae;D_5__Gloeocapsopsis BDHKU 35101;D_6__Gloeocapsopsis crepidinum BDU 20121	0	0	24	0	0	0	24	FALSE
D_0__Bacteria;D_1__Cyanobacteria;D_2__Oxyphotobacteria;D_3__Nostocales;__;__;__	0	40	25	0	11	0	76	TRUE
D_0__Bacteria;D_1__Cyanobacteria;D_2__Oxyphotobacteria;D_3__Synechococcales;D_4__Cyanobiaceae;D_5__Cyanobium PCC-6307;D_6__Synechococcus sp. CENA143	176	260	284	0	0	0	720	TRUE
D_0__Bacteria;D_1__Cyanobacteria;D_2__Oxyphotobacteria;__;__;__;__	0	3	0	0	0	0	3	FALSE
D_0__Bacteria;D_1__Dadabacteria;D_2__Dadabacteriia;D_3__Dadabacteriales;D_4__uncultured candidate division SBR1093 bacterium;D_5__;D_6__	0	8	0	0	0	0	8	FALSE
D_0__Bacteria;D_1__Deferribacteres;D_2__Deferribacteres;D_3__Deferribacterales;D_4__Deferribacteraceae;D_5__Mucispirillum;__	0	0	0	0	22	10	32	FALSE
D_0__Bacteria;D_1__Deinococcus-Thermus;D_2__Deinococci;D_3__Deinococcales;D_4__Trueperaceae;D_5__Truepera;__	0	0	0	0	6	0	6	FALSE
D_0__Bacteria;D_1__Dependentiae;D_2__Babeliae;D_3__Babeliales;D_4__Babeliaceae;D_5__Candidatus Babela;D_6__uncultured Candidatus Dependentiae bacterium	0	0	21	0	0	0	21	FALSE
D_0__Bacteria;D_1__Dependentiae;D_2__Babeliae;D_3__Babeliales;D_4__Babeliaceae;D_5__uncultured Acidobacterium sp.;D_6__	0	44	64	0	0	0	108	TRUE
D_0__Bacteria;D_1__Dependentiae;D_2__Babeliae;D_3__Babeliales;D_4__Vermiphilaceae;D_5__uncultured Verrucomicrobia bacterium;D_6__	0	0	0	6	12	5	23	FALSE
D_0__Bacteria;D_1__Dependentiae;D_2__Babeliae;D_3__Babeliales;D_4__Vermiphilaceae;D_5__uncultured deep-sea bacterium;D_6__	0	0	11	0	0	0	11	FALSE
D_0__Bacteria;D_1__Dependentiae;D_2__Babeliae;D_3__Babeliales;D_4__Vermiphilaceae;__;__	0	0	0	10	9	8	27	FALSE
D_0__Bacteria;D_1__Dependentiae;D_2__Babeliae;D_3__Babeliales;D_4__candidate division TM6 bacterium GW2011_GWF2_37_49;D_5__;D_6__	0	0	0	0	0	21	21	FALSE
D_0__Bacteria;D_1__Dependentiae;D_2__Babeliae;D_3__Babeliales;D_4__uncultured soil bacterium;D_5__;D_6__	0	0	3	0	0	0	3	FALSE
D_0__Bacteria;D_1__Edwardsbacteria;D_2__uncultured bacterium;D_3__;D_4__;D_5__;D_6__	0	0	0	0	7	0	7	FALSE
D_0__Bacteria;D_1__Elusimicrobia;D_2__Elusimicrobia;D_3__Lineage IV;D_4__Elusimicrobia bacterium GWA2_69_24;D_5__;D_6__	0	0	0	0	10	0	10	FALSE
D_0__Bacteria;D_1__Elusimicrobia;D_2__Elusimicrobia;D_3__Lineage IV;D_4__uncultured soil bacterium;D_5__;D_6__	0	0	0	0	0	7	7	FALSE
D_0__Bacteria;D_1__Elusimicrobia;D_2__Elusimicrobia;D_3__Lineage IV;__;__;__	0	0	0	0	2	7	9	FALSE
D_0__Bacteria;D_1__Elusimicrobia;D_2__Elusimicrobia;D_3__MD2894-B20;D_4__uncultured bacterium;D_5__;D_6__	0	0	0	0	18	0	18	FALSE
D_0__Bacteria;D_1__Elusimicrobia;D_2__Endomicrobia;D_3__Endomicrobiales;D_4__Endomicrobiaceae;D_5__Candidatus Endomicrobium;D_6__metagenome	0	0	0	16	0	0	16	FALSE
D_0__Bacteria;D_1__Elusimicrobia;D_2__Lineage IIa;D_3__uncultured Chitinophagaceae bacterium;D_4__;D_5__;D_6__	0	0	0	5	13	0	18	FALSE
D_0__Bacteria;D_1__Elusimicrobia;D_2__Lineage IIb;D_3__metagenome;D_4__;D_5__;D_6__	0	0	0	7	8	6	21	FALSE
D_0__Bacteria;D_1__Elusimicrobia;D_2__Lineage IIb;D_3__uncultured organism;D_4__;D_5__;D_6__	0	0	0	0	0	12	12	FALSE
D_0__Bacteria;D_1__Elusimicrobia;__;__;__;__;__	0	0	0	14	0	14	28	FALSE
D_0__Bacteria;D_1__Entotheonellaeota;D_2__Entotheonellia;D_3__Entotheonellales;D_4__Entotheonellaceae;D_5__Candidatus Entotheonella;D_6__Candidatus Entotheonella palauensis	0	0	13	0	0	0	13	FALSE
D_0__Bacteria;D_1__Epsilonbacteraeota;D_2__Campylobacteria;D_3__Campylobacterales;D_4__Arcobacteraceae;D_5__Arcobacter;D_6__bioreactor metagenome	0	0	0	11	0	0	11	FALSE
D_0__Bacteria;D_1__Epsilonbacteraeota;D_2__Campylobacteria;D_3__Campylobacterales;D_4__Arcobacteraceae;D_5__Arcobacter;__	0	0	0	47	0	0	47	FALSE
D_0__Bacteria;D_1__Epsilonbacteraeota;D_2__Campylobacteria;D_3__Campylobacterales;D_4__Campylobacteraceae;D_5__Campylobacter;__	0	0	0	0	3	8	11	FALSE
D_0__Bacteria;D_1__Epsilonbacteraeota;D_2__Campylobacteria;D_3__Campylobacterales;D_4__Helicobacteraceae;D_5__Helicobacter;D_6__Helicobacter sp. MIT 03-1614	0	0	0	0	14	0	14	FALSE
D_0__Bacteria;D_1__Epsilonbacteraeota;D_2__Campylobacteria;D_3__Campylobacterales;D_4__Helicobacteraceae;D_5__Helicobacter;__	0	0	0	10	12	5	27	FALSE
D_0__Bacteria;D_1__Epsilonbacteraeota;D_2__Campylobacteria;D_3__Campylobacterales;D_4__Sulfurovaceae;D_5__Sulfurovum;D_6__proteobacterium Dex60-82	0	0	0	17	20	0	37	FALSE
D_0__Bacteria;D_1__Epsilonbacteraeota;D_2__Campylobacteria;D_3__Campylobacterales;D_4__Sulfurovaceae;D_5__Sulfurovum;D_6__uncultured Helicobacteraceae bacterium	0	0	0	112	171	23	306	TRUE
D_0__Bacteria;D_1__Epsilonbacteraeota;D_2__Campylobacteria;D_3__Campylobacterales;D_4__Sulfurovaceae;D_5__Sulfurovum;D_6__uncultured bacterium VC2.1 Bac1	0	24	0	75	79	40	218	TRUE
D_0__Bacteria;D_1__Epsilonbacteraeota;D_2__Campylobacteria;D_3__Campylobacterales;D_4__Sulfurovaceae;D_5__Sulfurovum;__	0	0	0	0	41	0	41	FALSE
D_0__Bacteria;D_1__Epsilonbacteraeota;D_2__Campylobacteria;D_3__Campylobacterales;D_4__Thiovulaceae;D_5__Sulfuricurvum;D_6__uncultured archaeon	0	0	0	55	27	11	93	TRUE
D_0__Bacteria;D_1__Epsilonbacteraeota;D_2__Campylobacteria;D_3__Campylobacterales;D_4__Thiovulaceae;D_5__Sulfuricurvum;__	0	0	0	4	0	0	4	FALSE
D_0__Bacteria;D_1__Epsilonbacteraeota;D_2__Campylobacteria;D_3__Campylobacterales;D_4__Thiovulaceae;D_5__Sulfurimonas;D_6__bacterium enrichment culture clone 68	0	0	0	44	32	11	87	TRUE
D_0__Bacteria;D_1__Epsilonbacteraeota;D_2__Campylobacteria;D_3__Campylobacterales;D_4__Thiovulaceae;D_5__Sulfurimonas;D_6__uncultured Helicobacteraceae bacterium	0	0	0	37	13	0	50	TRUE
D_0__Bacteria;D_1__Epsilonbacteraeota;D_2__Campylobacteria;D_3__Campylobacterales;D_4__Thiovulaceae;D_5__Sulfurimonas;__	0	0	0	688	54	52	794	TRUE
D_0__Bacteria;D_1__Epsilonbacteraeota;D_2__Campylobacteria;D_3__Campylobacterales;__;__;__	63	0	0	81	18	0	162	TRUE
D_0__Bacteria;D_1__Epsilonbacteraeota;D_2__Campylobacteria;__;__;__;__	0	0	0	40	26	0	66	TRUE
D_0__Bacteria;D_1__Fibrobacteres;D_2__Chitinivibrionia;D_3__uncultured;D_4__uncultured Bacteroidetes/Chlorobi group bacterium;D_5__;D_6__	0	0	0	31	40	64	135	TRUE
D_0__Bacteria;D_1__Fibrobacteres;D_2__Chitinivibrionia;D_3__uncultured;D_4__uncultured Caldithrix sp.;D_5__;D_6__	0	0	0	0	0	24	24	FALSE
D_0__Bacteria;D_1__Fibrobacteres;D_2__Chitinivibrionia;D_3__uncultured;D_4__uncultured Microgenomates group bacterium;D_5__;D_6__	0	0	0	19	9	21	49	FALSE
D_0__Bacteria;D_1__Fibrobacteres;D_2__Fibrobacteria;D_3__Fibrobacterales;D_4__TG3;D_5__uncultured bacterium;D_6__	0	0	0	0	7	0	7	FALSE
D_0__Bacteria;D_1__Fibrobacteres;D_2__Fibrobacteria;D_3__Fibrobacterales;D_4__possible family 01;D_5__uncultured prokaryote;D_6__	0	0	0	22	0	16	38	FALSE
D_0__Bacteria;D_1__Fibrobacteres;D_2__Fibrobacteria;D_3__Fibrobacterales;D_4__possible family 01;D_5__uncultured soil bacterium;D_6__	0	0	0	28	39	37	104	TRUE
D_0__Bacteria;D_1__Firmicutes;D_2__Bacilli;D_3__Bacillales;D_4__Alicyclobacillaceae;D_5__Alicyclobacillus;D_6__unidentified	0	0	0	0	0	13	13	FALSE
D_0__Bacteria;D_1__Firmicutes;D_2__Bacilli;D_3__Bacillales;D_4__Alicyclobacillaceae;D_5__Alicyclobacillus;__	20	0	0	141	168	154	483	TRUE
D_0__Bacteria;D_1__Firmicutes;D_2__Bacilli;D_3__Bacillales;D_4__Alicyclobacillaceae;D_5__Tumebacillus;D_6__Tumebacillus flagellatus	0	0	0	0	12	0	12	FALSE
D_0__Bacteria;D_1__Firmicutes;D_2__Bacilli;D_3__Bacillales;D_4__Alicyclobacillaceae;D_5__Tumebacillus;D_6__Tumebacillus sp. B911E	0	0	12	0	0	0	12	FALSE
D_0__Bacteria;D_1__Firmicutes;D_2__Bacilli;D_3__Bacillales;D_4__Alicyclobacillaceae;D_5__Tumebacillus;D_6__uncultured Bacillus sp.	16	0	0	0	0	0	16	FALSE
D_0__Bacteria;D_1__Firmicutes;D_2__Bacilli;D_3__Bacillales;D_4__Alicyclobacillaceae;D_5__Tumebacillus;__	0	0	22	0	0	0	22	FALSE
D_0__Bacteria;D_1__Firmicutes;D_2__Bacilli;D_3__Bacillales;D_4__Bacillaceae;D_5__Bacillus;D_6__Bacillus pseudomycoides	0	0	0	119	153	108	380	TRUE
D_0__Bacteria;D_1__Firmicutes;D_2__Bacilli;D_3__Bacillales;D_4__Bacillaceae;D_5__Bacillus;__	3222	2426	5	85	172	196	6106	TRUE
D_0__Bacteria;D_1__Firmicutes;D_2__Bacilli;D_3__Bacillales;D_4__Bacillaceae;D_5__uncultured;D_6__uncultured Virgibacillus sp.	0	0	0	0	11	20	31	FALSE
D_0__Bacteria;D_1__Firmicutes;D_2__Bacilli;D_3__Bacillales;D_4__Bacillaceae;__;__	1392	1945	717	209	212	214	4689	TRUE
D_0__Bacteria;D_1__Firmicutes;D_2__Bacilli;D_3__Bacillales;D_4__Family XI;D_5__Gemella;__	0	0	0	0	21	24	45	FALSE
D_0__Bacteria;D_1__Firmicutes;D_2__Bacilli;D_3__Bacillales;D_4__Family XII;D_5__Exiguobacterium;__	217	533	881	0	0	0	1631	TRUE
D_0__Bacteria;D_1__Firmicutes;D_2__Bacilli;D_3__Bacillales;D_4__Paenibacillaceae;D_5__Aneurinibacillus;__	120	0	148	0	0	0	268	TRUE
D_0__Bacteria;D_1__Firmicutes;D_2__Bacilli;D_3__Bacillales;D_4__Paenibacillaceae;D_5__Brevibacillus;D_6__Brevibacillus sp. SWCR50_4	3	0	0	0	0	0	3	FALSE
D_0__Bacteria;D_1__Firmicutes;D_2__Bacilli;D_3__Bacillales;D_4__Paenibacillaceae;D_5__Paenibacillus;D_6__Paenibacillus selenitireducens	0	0	0	12	0	13	25	FALSE
D_0__Bacteria;D_1__Firmicutes;D_2__Bacilli;D_3__Bacillales;D_4__Paenibacillaceae;D_5__Paenibacillus;__	0	0	0	0	11	10	21	FALSE
D_0__Bacteria;D_1__Firmicutes;D_2__Bacilli;D_3__Bacillales;D_4__Staphylococcaceae;D_5__Jeotgalicoccus;__	0	0	0	5	28	12	45	FALSE
D_0__Bacteria;D_1__Firmicutes;D_2__Bacilli;D_3__Bacillales;D_4__Staphylococcaceae;D_5__Staphylococcus;__	0	0	0	44	93	287	424	TRUE
D_0__Bacteria;D_1__Firmicutes;D_2__Bacilli;D_3__Bacillales;__;__;__	1837	4907	1217	798	1029	774	10562	TRUE
D_0__Bacteria;D_1__Firmicutes;D_2__Bacilli;D_3__Lactobacillales;D_4__Aerococcaceae;D_5__Aerococcus;__	0	0	0	0	22	0	22	FALSE
D_0__Bacteria;D_1__Firmicutes;D_2__Bacilli;D_3__Lactobacillales;D_4__Carnobacteriaceae;D_5__Atopostipes;__	0	0	0	0	13	19	32	FALSE
D_0__Bacteria;D_1__Firmicutes;D_2__Bacilli;D_3__Lactobacillales;D_4__Carnobacteriaceae;D_5__Dolosigranulum;D_6__Dolosigranulum pigrum ATCC 51524	0	0	0	0	5	0	5	FALSE
D_0__Bacteria;D_1__Firmicutes;D_2__Bacilli;D_3__Lactobacillales;D_4__Enterococcaceae;D_5__Enterococcus;__	0	0	0	17	178	104	299	TRUE
D_0__Bacteria;D_1__Firmicutes;D_2__Bacilli;D_3__Lactobacillales;D_4__Lactobacillaceae;D_5__Lactobacillus;D_6__Lactobacillus amylolyticus	0	0	0	0	3	0	3	FALSE
D_0__Bacteria;D_1__Firmicutes;D_2__Bacilli;D_3__Lactobacillales;D_4__Lactobacillaceae;D_5__Lactobacillus;D_6__Lactobacillus aviarius subsp. araffinosus DSM 20653	0	0	0	0	44	0	44	FALSE
D_0__Bacteria;D_1__Firmicutes;D_2__Bacilli;D_3__Lactobacillales;D_4__Lactobacillaceae;D_5__Lactobacillus;D_6__Lactobacillus fermentum	0	0	0	0	5	0	5	FALSE
D_0__Bacteria;D_1__Firmicutes;D_2__Bacilli;D_3__Lactobacillales;D_4__Lactobacillaceae;D_5__Lactobacillus;D_6__Lactobacillus iners AB-1	0	106	91	0	0	0	197	TRUE
D_0__Bacteria;D_1__Firmicutes;D_2__Bacilli;D_3__Lactobacillales;D_4__Lactobacillaceae;D_5__Lactobacillus;D_6__Lactobacillus jensenii	0	0	0	0	16	0	16	FALSE
D_0__Bacteria;D_1__Firmicutes;D_2__Bacilli;D_3__Lactobacillales;D_4__Lactobacillaceae;D_5__Lactobacillus;D_6__gut metagenome	0	0	0	25	241	188	454	TRUE
D_0__Bacteria;D_1__Firmicutes;D_2__Bacilli;D_3__Lactobacillales;D_4__Lactobacillaceae;D_5__Lactobacillus;__	164	0	141	172	1917	528	2922	TRUE
D_0__Bacteria;D_1__Firmicutes;D_2__Bacilli;D_3__Lactobacillales;D_4__Leuconostocaceae;D_5__Leuconostoc;D_6__unidentified	0	0	0	0	0	10	10	FALSE
D_0__Bacteria;D_1__Firmicutes;D_2__Bacilli;D_3__Lactobacillales;D_4__Leuconostocaceae;D_5__Weissella;__	0	0	0	0	65	34	99	TRUE
D_0__Bacteria;D_1__Firmicutes;D_2__Bacilli;D_3__Lactobacillales;D_4__Streptococcaceae;D_5__Lactococcus;__	0	0	0	0	37	24	61	TRUE
D_0__Bacteria;D_1__Firmicutes;D_2__Bacilli;D_3__Lactobacillales;D_4__Streptococcaceae;D_5__Streptococcus;D_6__Streptococcus intermedius C270	0	0	0	0	0	8	8	FALSE
D_0__Bacteria;D_1__Firmicutes;D_2__Bacilli;D_3__Lactobacillales;D_4__Streptococcaceae;D_5__Streptococcus;__	0	0	0	14	441	163	618	TRUE
D_0__Bacteria;D_1__Firmicutes;D_2__Bacilli;D_3__Lactobacillales;__;__;__	0	0	0	0	16	0	16	FALSE
D_0__Bacteria;D_1__Firmicutes;D_2__Bacilli;__;__;__;__	0	0	0	0	12	0	12	FALSE
D_0__Bacteria;D_1__Firmicutes;D_2__Clostridia;D_3__Clostridiales;D_4__Christensenellaceae;D_5__Christensenellaceae R-7 group;D_6__uncultured Christensenella sp.	0	0	0	75	73	227	375	TRUE
D_0__Bacteria;D_1__Firmicutes;D_2__Clostridia;D_3__Clostridiales;D_4__Christensenellaceae;D_5__Christensenellaceae R-7 group;__	0	0	0	0	5	16	21	FALSE
D_0__Bacteria;D_1__Firmicutes;D_2__Clostridia;D_3__Clostridiales;D_4__Clostridiaceae 1;D_5__Candidatus Arthromitus;D_6__Candidatus Arthromitus sp. SFB-mouse-NYU	0	0	0	0	5	0	5	FALSE
D_0__Bacteria;D_1__Firmicutes;D_2__Clostridia;D_3__Clostridiales;D_4__Clostridiaceae 1;D_5__Clostridium sensu stricto 10;D_6__Clostridiales bacterium oral taxon 876 str. F0540	0	0	0	0	0	21	21	FALSE
D_0__Bacteria;D_1__Firmicutes;D_2__Clostridia;D_3__Clostridiales;D_4__Clostridiaceae 1;D_5__Clostridium sensu stricto 12;D_6__Clostridium magnum DSM 2767	0	0	0	17	25	0	42	FALSE
D_0__Bacteria;D_1__Firmicutes;D_2__Clostridia;D_3__Clostridiales;D_4__Clostridiaceae 1;D_5__Clostridium sensu stricto 12;D_6__Clostridium nitrophenolicum	0	0	0	0	0	20	20	FALSE
D_0__Bacteria;D_1__Firmicutes;D_2__Clostridia;D_3__Clostridiales;D_4__Clostridiaceae 1;D_5__Clostridium sensu stricto 12;D_6__uncultured bacterium SJA-65	0	0	0	12	14	17	43	FALSE
D_0__Bacteria;D_1__Firmicutes;D_2__Clostridia;D_3__Clostridiales;D_4__Clostridiaceae 1;D_5__Clostridium sensu stricto 12;__	0	0	0	16	13	14	43	FALSE
D_0__Bacteria;D_1__Firmicutes;D_2__Clostridia;D_3__Clostridiales;D_4__Clostridiaceae 1;D_5__Clostridium sensu stricto 13;__	312	400	704	0	0	0	1416	TRUE
D_0__Bacteria;D_1__Firmicutes;D_2__Clostridia;D_3__Clostridiales;D_4__Clostridiaceae 1;D_5__Clostridium sensu stricto 1;__	0	0	0	77	121	101	299	TRUE
D_0__Bacteria;D_1__Firmicutes;D_2__Clostridia;D_3__Clostridiales;D_4__Clostridiaceae 1;D_5__Clostridium sensu stricto 3;D_6__uncultured soil bacterium	0	0	0	10	10	0	20	FALSE
D_0__Bacteria;D_1__Firmicutes;D_2__Clostridia;D_3__Clostridiales;D_4__Clostridiaceae 1;D_5__Clostridium sensu stricto 7;__	248	356	0	0	0	0	604	TRUE
D_0__Bacteria;D_1__Firmicutes;D_2__Clostridia;D_3__Clostridiales;D_4__Clostridiaceae 1;D_5__Clostridium sensu stricto 8;D_6__Clostridium sp. A18	0	0	0	0	0	22	22	FALSE
D_0__Bacteria;D_1__Firmicutes;D_2__Clostridia;D_3__Clostridiales;D_4__Clostridiaceae 1;D_5__Clostridium sensu stricto 8;__	0	0	0	40	60	37	137	TRUE
D_0__Bacteria;D_1__Firmicutes;D_2__Clostridia;D_3__Clostridiales;D_4__Clostridiaceae 1;D_5__Oceanirhabdus;D_6__Oceanirhabdus sediminicola	0	0	0	0	0	11	11	FALSE
D_0__Bacteria;D_1__Firmicutes;D_2__Clostridia;D_3__Clostridiales;D_4__Clostridiaceae 1;D_5__Proteiniclasticum;__	0	0	0	0	0	12	12	FALSE
D_0__Bacteria;D_1__Firmicutes;D_2__Clostridia;D_3__Clostridiales;D_4__Clostridiaceae 1;D_5__uncultured;D_6__uncultured Eubacterium sp.	0	0	141	0	0	0	141	TRUE
D_0__Bacteria;D_1__Firmicutes;D_2__Clostridia;D_3__Clostridiales;D_4__Clostridiaceae 1;D_5__uncultured;__	0	240	27	0	0	0	267	TRUE
D_0__Bacteria;D_1__Firmicutes;D_2__Clostridia;D_3__Clostridiales;D_4__Clostridiaceae 1;__;__	723	1166	454	55	120	79	2597	TRUE
D_0__Bacteria;D_1__Firmicutes;D_2__Clostridia;D_3__Clostridiales;D_4__Clostridiaceae 3;D_5__Brassicibacter;D_6__uncultured Firmicutes bacterium	0	725	0	0	0	0	725	TRUE
D_0__Bacteria;D_1__Firmicutes;D_2__Clostridia;D_3__Clostridiales;D_4__Clostridiaceae 3;D_5__Clostridiisalibacter;D_6__Clostridium sp. AN-AS3B	13	0	0	0	0	0	13	FALSE
D_0__Bacteria;D_1__Firmicutes;D_2__Clostridia;D_3__Clostridiales;D_4__Clostridiaceae 3;D_5__Clostridiisalibacter;D_6__Clostridium sp. AN-AS6E	1402	1531	576	0	0	0	3509	TRUE
D_0__Bacteria;D_1__Firmicutes;D_2__Clostridia;D_3__Clostridiales;D_4__Clostridiaceae 3;D_5__Clostridiisalibacter;D_6__bacterium YC-ZSS-LKJ129	452	1394	264	0	0	0	2110	TRUE
D_0__Bacteria;D_1__Firmicutes;D_2__Clostridia;D_3__Clostridiales;D_4__Clostridiales vadinBB60 group;D_5__gut metagenome;D_6__	0	0	0	0	3	0	3	FALSE
D_0__Bacteria;D_1__Firmicutes;D_2__Clostridia;D_3__Clostridiales;D_4__Eubacteriaceae;D_5__Alkalibaculum;D_6__Alkalibaculum bacchi	0	0	0	0	5	0	5	FALSE
D_0__Bacteria;D_1__Firmicutes;D_2__Clostridia;D_3__Clostridiales;D_4__Family XI;D_5__Gottschalkia;D_6__uncultured organism	0	6	0	0	0	0	6	FALSE
D_0__Bacteria;D_1__Firmicutes;D_2__Clostridia;D_3__Clostridiales;D_4__Family XI;D_5__Parvimonas;__	0	0	0	0	9	0	9	FALSE
D_0__Bacteria;D_1__Firmicutes;D_2__Clostridia;D_3__Clostridiales;D_4__Family XI;D_5__W5053;D_6__uncultured Clostridiales bacterium	0	0	0	0	7	0	7	FALSE
D_0__Bacteria;D_1__Firmicutes;D_2__Clostridia;D_3__Clostridiales;D_4__Family XII;D_5__Fusibacter;__	0	0	0	0	0	2	2	FALSE
D_0__Bacteria;D_1__Firmicutes;D_2__Clostridia;D_3__Clostridiales;D_4__Gracilibacteraceae;__;__	0	17	0	0	0	0	17	FALSE
D_0__Bacteria;D_1__Firmicutes;D_2__Clostridia;D_3__Clostridiales;D_4__Heliobacteriaceae;D_5__Hydrogenispora;D_6__Hydrogenispora ethanolica	0	19	0	0	0	0	19	FALSE
D_0__Bacteria;D_1__Firmicutes;D_2__Clostridia;D_3__Clostridiales;D_4__Lachnospiraceae;D_5__28-4;__	0	0	0	0	0	13	13	FALSE
D_0__Bacteria;D_1__Firmicutes;D_2__Clostridia;D_3__Clostridiales;D_4__Lachnospiraceae;D_5__Anaerosporobacter;D_6__Clostridiales bacterium 77-5d	0	0	0	0	0	9	9	FALSE
D_0__Bacteria;D_1__Firmicutes;D_2__Clostridia;D_3__Clostridiales;D_4__Lachnospiraceae;D_5__Anaerosporobacter;D_6__uncultured organism	0	0	0	0	0	17	17	FALSE
D_0__Bacteria;D_1__Firmicutes;D_2__Clostridia;D_3__Clostridiales;D_4__Lachnospiraceae;D_5__Anaerostipes;D_6__metagenome	0	0	0	8	0	12	20	FALSE
D_0__Bacteria;D_1__Firmicutes;D_2__Clostridia;D_3__Clostridiales;D_4__Lachnospiraceae;D_5__Blautia;D_6__Lachnospiraceae bacterium 28-4	0	0	0	0	10	12	22	FALSE
D_0__Bacteria;D_1__Firmicutes;D_2__Clostridia;D_3__Clostridiales;D_4__Lachnospiraceae;D_5__Blautia;D_6__uncultured Bacteroides sp.	0	0	0	0	7	0	7	FALSE
D_0__Bacteria;D_1__Firmicutes;D_2__Clostridia;D_3__Clostridiales;D_4__Lachnospiraceae;D_5__Blautia;__	0	0	0	0	65	262	327	TRUE
D_0__Bacteria;D_1__Firmicutes;D_2__Clostridia;D_3__Clostridiales;D_4__Lachnospiraceae;D_5__Butyrivibrio;D_6__gut metagenome	0	0	0	102	102	452	656	TRUE
D_0__Bacteria;D_1__Firmicutes;D_2__Clostridia;D_3__Clostridiales;D_4__Lachnospiraceae;D_5__CHKCI001;D_6__uncultured bacterium	0	0	0	0	0	36	36	FALSE
D_0__Bacteria;D_1__Firmicutes;D_2__Clostridia;D_3__Clostridiales;D_4__Lachnospiraceae;D_5__Coprococcus 1;D_6__metagenome	0	0	0	0	6	0	6	FALSE
D_0__Bacteria;D_1__Firmicutes;D_2__Clostridia;D_3__Clostridiales;D_4__Lachnospiraceae;D_5__Dorea;D_6__Dorea longicatena	0	0	0	14	23	30	67	TRUE
D_0__Bacteria;D_1__Firmicutes;D_2__Clostridia;D_3__Clostridiales;D_4__Lachnospiraceae;D_5__Fusicatenibacter;D_6__Fusicatenibacter saccharivorans	0	0	0	28	44	115	187	TRUE
D_0__Bacteria;D_1__Firmicutes;D_2__Clostridia;D_3__Clostridiales;D_4__Lachnospiraceae;D_5__GCA-900066575;D_6__uncultured Clostridium sp.	0	0	0	0	0	22	22	FALSE
D_0__Bacteria;D_1__Firmicutes;D_2__Clostridia;D_3__Clostridiales;D_4__Lachnospiraceae;D_5__Lachnoclostridium;__	0	0	0	0	10	45	55	TRUE
D_0__Bacteria;D_1__Firmicutes;D_2__Clostridia;D_3__Clostridiales;D_4__Lachnospiraceae;D_5__Lachnospiraceae ND3007 group;D_6__metagenome	0	0	0	6	8	35	49	FALSE
D_0__Bacteria;D_1__Firmicutes;D_2__Clostridia;D_3__Clostridiales;D_4__Lachnospiraceae;D_5__Lachnospiraceae NK4A136 group;D_6__Clostridiales bacterium CIEAF 020	0	0	0	0	11	10	21	FALSE
D_0__Bacteria;D_1__Firmicutes;D_2__Clostridia;D_3__Clostridiales;D_4__Lachnospiraceae;D_5__Lachnospiraceae NK4A136 group;D_6__Lachnospiraceae bacterium 10-1	0	0	0	0	11	0	11	FALSE
D_0__Bacteria;D_1__Firmicutes;D_2__Clostridia;D_3__Clostridiales;D_4__Lachnospiraceae;D_5__Lachnospiraceae NK4A136 group;D_6__human gut metagenome	0	0	0	189	198	658	1045	TRUE
D_0__Bacteria;D_1__Firmicutes;D_2__Clostridia;D_3__Clostridiales;D_4__Lachnospiraceae;D_5__Lachnospiraceae NK4A136 group;__	0	0	0	0	16	28	44	FALSE
D_0__Bacteria;D_1__Firmicutes;D_2__Clostridia;D_3__Clostridiales;D_4__Lachnospiraceae;D_5__Lachnospiraceae UCG-004;D_6__uncultured Clostridium sp.	0	0	0	0	15	27	42	FALSE
D_0__Bacteria;D_1__Firmicutes;D_2__Clostridia;D_3__Clostridiales;D_4__Lachnospiraceae;D_5__Lachnospiraceae UCG-004;D_6__unidentified	0	0	0	0	0	25	25	FALSE
D_0__Bacteria;D_1__Firmicutes;D_2__Clostridia;D_3__Clostridiales;D_4__Lachnospiraceae;D_5__Lachnospiraceae UCG-008;D_6__Ruminococcus sp. CE2	0	0	0	31	179	161	371	TRUE
D_0__Bacteria;D_1__Firmicutes;D_2__Clostridia;D_3__Clostridiales;D_4__Lachnospiraceae;D_5__Lachnospiraceae UCG-010;D_6__uncultured organism	0	0	0	8	6	29	43	FALSE
D_0__Bacteria;D_1__Firmicutes;D_2__Clostridia;D_3__Clostridiales;D_4__Lachnospiraceae;D_5__Mobilitalea;D_6__unidentified eubacterium clone BSV61	0	0	0	0	20	0	20	FALSE
D_0__Bacteria;D_1__Firmicutes;D_2__Clostridia;D_3__Clostridiales;D_4__Lachnospiraceae;D_5__Roseburia;D_6__Eubacterium sp. 14-2	0	0	0	44	51	190	285	TRUE
D_0__Bacteria;D_1__Firmicutes;D_2__Clostridia;D_3__Clostridiales;D_4__Lachnospiraceae;D_5__Roseburia;__	0	0	0	14	23	160	197	TRUE
D_0__Bacteria;D_1__Firmicutes;D_2__Clostridia;D_3__Clostridiales;D_4__Lachnospiraceae;D_5__Stomatobaculum;__	0	0	0	0	0	22	22	FALSE
D_0__Bacteria;D_1__Firmicutes;D_2__Clostridia;D_3__Clostridiales;D_4__Lachnospiraceae;D_5__Tyzzerella 3;D_6__unidentified	0	0	0	0	6	17	23	FALSE
D_0__Bacteria;D_1__Firmicutes;D_2__Clostridia;D_3__Clostridiales;D_4__Lachnospiraceae;D_5__Tyzzerella;__	0	0	0	0	16	0	16	FALSE
D_0__Bacteria;D_1__Firmicutes;D_2__Clostridia;D_3__Clostridiales;D_4__Lachnospiraceae;D_5__Vallitalea;D_6__Clostridium sp. AN-AS6C	217	0	0	0	0	0	217	TRUE
D_0__Bacteria;D_1__Firmicutes;D_2__Clostridia;D_3__Clostridiales;D_4__Lachnospiraceae;D_5__[Eubacterium] eligens group;D_6__[Eubacterium] eligens ATCC 27750	0	0	0	0	10	0	10	FALSE
D_0__Bacteria;D_1__Firmicutes;D_2__Clostridia;D_3__Clostridiales;D_4__Lachnospiraceae;D_5__[Eubacterium] fissicatena group;__	0	0	0	0	0	8	8	FALSE
D_0__Bacteria;D_1__Firmicutes;D_2__Clostridia;D_3__Clostridiales;D_4__Lachnospiraceae;D_5__[Eubacterium] hallii group;D_6__metagenome	0	0	0	16	37	31	84	TRUE
D_0__Bacteria;D_1__Firmicutes;D_2__Clostridia;D_3__Clostridiales;D_4__Lachnospiraceae;D_5__[Eubacterium] ruminantium group;D_6__gut metagenome	0	0	0	0	0	19	19	FALSE
D_0__Bacteria;D_1__Firmicutes;D_2__Clostridia;D_3__Clostridiales;D_4__Lachnospiraceae;D_5__[Eubacterium] ventriosum group;D_6__human gut metagenome	0	0	0	5	0	25	30	FALSE
D_0__Bacteria;D_1__Firmicutes;D_2__Clostridia;D_3__Clostridiales;D_4__Lachnospiraceae;D_5__[Eubacterium] xylanophilum group;D_6__uncultured organism	0	0	0	29	38	70	137	TRUE
D_0__Bacteria;D_1__Firmicutes;D_2__Clostridia;D_3__Clostridiales;D_4__Lachnospiraceae;D_5__[Ruminococcus] gauvreauii group;D_6__unidentified	0	0	0	0	0	10	10	FALSE
D_0__Bacteria;D_1__Firmicutes;D_2__Clostridia;D_3__Clostridiales;D_4__Lachnospiraceae;D_5__[Ruminococcus] gnavus group;__	0	0	0	0	16	33	49	FALSE
D_0__Bacteria;D_1__Firmicutes;D_2__Clostridia;D_3__Clostridiales;D_4__Lachnospiraceae;D_5__[Ruminococcus] torques group;__	0	0	0	16	42	78	136	TRUE
D_0__Bacteria;D_1__Firmicutes;D_2__Clostridia;D_3__Clostridiales;D_4__Lachnospiraceae;D_5__uncultured Lachnospira sp.;D_6__	0	0	0	9	18	90	117	TRUE
D_0__Bacteria;D_1__Firmicutes;D_2__Clostridia;D_3__Clostridiales;D_4__Lachnospiraceae;D_5__uncultured;D_6__Clostridium sp. Culture-54	0	0	0	0	9	0	9	FALSE
D_0__Bacteria;D_1__Firmicutes;D_2__Clostridia;D_3__Clostridiales;D_4__Lachnospiraceae;D_5__uncultured;D_6__intestinal bacterium CG19-1	0	0	0	0	7	0	7	FALSE
D_0__Bacteria;D_1__Firmicutes;D_2__Clostridia;D_3__Clostridiales;D_4__Lachnospiraceae;D_5__uncultured;__	0	0	0	0	0	23	23	FALSE
D_0__Bacteria;D_1__Firmicutes;D_2__Clostridia;D_3__Clostridiales;D_4__Lachnospiraceae;__;__	40	147	0	215	415	975	1792	TRUE
D_0__Bacteria;D_1__Firmicutes;D_2__Clostridia;D_3__Clostridiales;D_4__Peptococcaceae;D_5__Desulfosporosinus;__	0	0	0	0	6	0	6	FALSE
D_0__Bacteria;D_1__Firmicutes;D_2__Clostridia;D_3__Clostridiales;D_4__Peptococcaceae;D_5__Desulfotomaculum;__	0	0	0	0	0	22	22	FALSE
D_0__Bacteria;D_1__Firmicutes;D_2__Clostridia;D_3__Clostridiales;D_4__Peptostreptococcaceae;D_5__Clostridioides;__	0	0	0	0	0	10	10	FALSE
D_0__Bacteria;D_1__Firmicutes;D_2__Clostridia;D_3__Clostridiales;D_4__Peptostreptococcaceae;D_5__Paraclostridium;__	0	0	0	26	10	39	75	TRUE
D_0__Bacteria;D_1__Firmicutes;D_2__Clostridia;D_3__Clostridiales;D_4__Peptostreptococcaceae;D_5__Peptostreptococcus;D_6__uncultured Peptostreptococcus sp.	0	0	0	0	3	0	3	FALSE
D_0__Bacteria;D_1__Firmicutes;D_2__Clostridia;D_3__Clostridiales;D_4__Peptostreptococcaceae;D_5__Romboutsia;__	0	259	232	0	18	0	509	TRUE
D_0__Bacteria;D_1__Firmicutes;D_2__Clostridia;D_3__Clostridiales;D_4__Peptostreptococcaceae;D_5__Terrisporobacter;D_6__uncultured Clostridium sp.	0	0	0	0	30	12	42	FALSE
D_0__Bacteria;D_1__Firmicutes;D_2__Clostridia;D_3__Clostridiales;D_4__Peptostreptococcaceae;__;__	782	2151	1138	28	135	64	4298	TRUE
D_0__Bacteria;D_1__Firmicutes;D_2__Clostridia;D_3__Clostridiales;D_4__Ruminococcaceae;D_5__Anaerobacterium;D_6__uncultured Bacteroides sp.	0	0	0	23	18	0	41	FALSE
D_0__Bacteria;D_1__Firmicutes;D_2__Clostridia;D_3__Clostridiales;D_4__Ruminococcaceae;D_5__Anaerotruncus;D_6__Anaerotruncus colihominis DSM 17241	0	0	0	0	7	0	7	FALSE
D_0__Bacteria;D_1__Firmicutes;D_2__Clostridia;D_3__Clostridiales;D_4__Ruminococcaceae;D_5__Anaerotruncus;D_6__Anaerotruncus sp. G3(2012)	0	0	0	0	5	0	5	FALSE
D_0__Bacteria;D_1__Firmicutes;D_2__Clostridia;D_3__Clostridiales;D_4__Ruminococcaceae;D_5__Butyricicoccus;D_6__uncultured Firmicutes bacterium	0	0	0	7	20	46	73	TRUE
D_0__Bacteria;D_1__Firmicutes;D_2__Clostridia;D_3__Clostridiales;D_4__Ruminococcaceae;D_5__Faecalibacterium;D_6__uncultured Faecalibacterium sp.	0	0	0	103	117	541	761	TRUE
D_0__Bacteria;D_1__Firmicutes;D_2__Clostridia;D_3__Clostridiales;D_4__Ruminococcaceae;D_5__Faecalibacterium;__	0	0	0	124	160	549	833	TRUE
D_0__Bacteria;D_1__Firmicutes;D_2__Clostridia;D_3__Clostridiales;D_4__Ruminococcaceae;D_5__Intestinimonas;__	0	0	0	0	0	20	20	FALSE
D_0__Bacteria;D_1__Firmicutes;D_2__Clostridia;D_3__Clostridiales;D_4__Ruminococcaceae;D_5__Negativibacillus;D_6__uncultured organism	0	0	0	0	0	8	8	FALSE
D_0__Bacteria;D_1__Firmicutes;D_2__Clostridia;D_3__Clostridiales;D_4__Ruminococcaceae;D_5__Oscillibacter;D_6__Oscillibacter sp. 1-3	0	0	0	0	5	35	40	FALSE
D_0__Bacteria;D_1__Firmicutes;D_2__Clostridia;D_3__Clostridiales;D_4__Ruminococcaceae;D_5__Oscillibacter;__	0	0	0	0	7	0	7	FALSE
D_0__Bacteria;D_1__Firmicutes;D_2__Clostridia;D_3__Clostridiales;D_4__Ruminococcaceae;D_5__Ruminiclostridium 6;D_6__gut metagenome	0	0	0	0	7	30	37	FALSE
D_0__Bacteria;D_1__Firmicutes;D_2__Clostridia;D_3__Clostridiales;D_4__Ruminococcaceae;D_5__Ruminiclostridium 9;__	0	0	0	0	20	18	38	FALSE
D_0__Bacteria;D_1__Firmicutes;D_2__Clostridia;D_3__Clostridiales;D_4__Ruminococcaceae;D_5__Ruminococcaceae NK4A214 group;D_6__gut metagenome	0	0	0	5	6	45	56	TRUE
D_0__Bacteria;D_1__Firmicutes;D_2__Clostridia;D_3__Clostridiales;D_4__Ruminococcaceae;D_5__Ruminococcaceae NK4A214 group;D_6__metagenome	0	0	0	0	0	16	16	FALSE
D_0__Bacteria;D_1__Firmicutes;D_2__Clostridia;D_3__Clostridiales;D_4__Ruminococcaceae;D_5__Ruminococcaceae NK4A214 group;__	0	0	0	0	0	46	46	FALSE
D_0__Bacteria;D_1__Firmicutes;D_2__Clostridia;D_3__Clostridiales;D_4__Ruminococcaceae;D_5__Ruminococcaceae UCG-002;D_6__Trichuris trichiura (human whipworm)	0	0	0	19	35	53	107	TRUE
D_0__Bacteria;D_1__Firmicutes;D_2__Clostridia;D_3__Clostridiales;D_4__Ruminococcaceae;D_5__Ruminococcaceae UCG-002;D_6__gut metagenome	0	0	0	55	56	157	268	TRUE
D_0__Bacteria;D_1__Firmicutes;D_2__Clostridia;D_3__Clostridiales;D_4__Ruminococcaceae;D_5__Ruminococcaceae UCG-003;D_6__gut metagenome	0	0	0	0	0	13	13	FALSE
D_0__Bacteria;D_1__Firmicutes;D_2__Clostridia;D_3__Clostridiales;D_4__Ruminococcaceae;D_5__Ruminococcaceae UCG-003;D_6__metagenome	0	0	0	0	8	0	8	FALSE
D_0__Bacteria;D_1__Firmicutes;D_2__Clostridia;D_3__Clostridiales;D_4__Ruminococcaceae;D_5__Ruminococcaceae UCG-005;D_6__wallaby gut metagenome	0	0	0	0	0	19	19	FALSE
D_0__Bacteria;D_1__Firmicutes;D_2__Clostridia;D_3__Clostridiales;D_4__Ruminococcaceae;D_5__Ruminococcaceae UCG-009;D_6__unidentified	0	0	0	0	6	0	6	FALSE
D_0__Bacteria;D_1__Firmicutes;D_2__Clostridia;D_3__Clostridiales;D_4__Ruminococcaceae;D_5__Ruminococcaceae UCG-012;D_6__bacterium enrichment culture clone E34	0	15	0	0	0	0	15	FALSE
D_0__Bacteria;D_1__Firmicutes;D_2__Clostridia;D_3__Clostridiales;D_4__Ruminococcaceae;D_5__Ruminococcaceae UCG-014;D_6__uncultured Ruminococcaceae bacterium	0	0	0	65	108	232	405	TRUE
D_0__Bacteria;D_1__Firmicutes;D_2__Clostridia;D_3__Clostridiales;D_4__Ruminococcaceae;D_5__Ruminococcus 1;D_6__Ruminococcus sp. UNK.MGS-30	0	0	0	0	11	0	11	FALSE
D_0__Bacteria;D_1__Firmicutes;D_2__Clostridia;D_3__Clostridiales;D_4__Ruminococcaceae;D_5__Ruminococcus 1;__	0	0	0	22	22	91	135	TRUE
D_0__Bacteria;D_1__Firmicutes;D_2__Clostridia;D_3__Clostridiales;D_4__Ruminococcaceae;D_5__Ruminococcus 2;D_6__Ruminococcus bromii L2-63	0	0	0	22	43	130	195	TRUE
D_0__Bacteria;D_1__Firmicutes;D_2__Clostridia;D_3__Clostridiales;D_4__Ruminococcaceae;D_5__Sporobacter;D_6__unidentified	23	0	0	0	0	0	23	FALSE
D_0__Bacteria;D_1__Firmicutes;D_2__Clostridia;D_3__Clostridiales;D_4__Ruminococcaceae;D_5__Subdoligranulum;D_6__bacterium ic1395	0	0	0	36	40	178	254	TRUE
D_0__Bacteria;D_1__Firmicutes;D_2__Clostridia;D_3__Clostridiales;D_4__Ruminococcaceae;D_5__Subdoligranulum;__	0	0	0	0	9	47	56	TRUE
D_0__Bacteria;D_1__Firmicutes;D_2__Clostridia;D_3__Clostridiales;D_4__Ruminococcaceae;D_5__UBA1819;D_6__Ruthenibacterium lactatiformans	0	0	0	0	18	24	42	FALSE
D_0__Bacteria;D_1__Firmicutes;D_2__Clostridia;D_3__Clostridiales;D_4__Ruminococcaceae;D_5__[Eubacterium] coprostanoligenes group;D_6__human gut metagenome	0	0	0	0	0	10	10	FALSE
D_0__Bacteria;D_1__Firmicutes;D_2__Clostridia;D_3__Clostridiales;D_4__Ruminococcaceae;D_5__[Eubacterium] coprostanoligenes group;D_6__metagenome	0	0	0	0	27	0	27	FALSE
D_0__Bacteria;D_1__Firmicutes;D_2__Clostridia;D_3__Clostridiales;D_4__Ruminococcaceae;D_5__[Eubacterium] coprostanoligenes group;__	0	0	0	0	26	0	26	FALSE
D_0__Bacteria;D_1__Firmicutes;D_2__Clostridia;D_3__Clostridiales;D_4__Ruminococcaceae;D_5__uncultured;D_6__Clostridium sp. Clone-3	0	0	0	0	16	0	16	FALSE
D_0__Bacteria;D_1__Firmicutes;D_2__Clostridia;D_3__Clostridiales;D_4__Ruminococcaceae;D_5__uncultured;D_6__Clostridium sp. Culture-1	0	0	0	0	0	21	21	FALSE
D_0__Bacteria;D_1__Firmicutes;D_2__Clostridia;D_3__Clostridiales;D_4__Ruminococcaceae;D_5__uncultured;D_6__uncultured soil bacterium	0	0	0	0	0	6	6	FALSE
D_0__Bacteria;D_1__Firmicutes;D_2__Clostridia;D_3__Clostridiales;D_4__Ruminococcaceae;__;__	56	25	40	56	132	134	443	TRUE
D_0__Bacteria;D_1__Firmicutes;D_2__Clostridia;D_3__Clostridiales;D_4__Syntrophomonadaceae;D_5__Syntrophomonas;__	0	0	0	27	10	39	76	TRUE
D_0__Bacteria;D_1__Firmicutes;D_2__Clostridia;D_3__Clostridiales;__;__;__	58	61	47	21	70	49	306	TRUE
D_0__Bacteria;D_1__Firmicutes;D_2__Clostridia;D_3__Thermoanaerobacterales;D_4__Family III;D_5__Thermoanaerobacterium;D_6__Thermoanaerobacterium xylanolyticum LX-11	0	0	0	0	8	0	8	FALSE
D_0__Bacteria;D_1__Firmicutes;D_2__Clostridia;__;__;__;__	0	0	0	74	75	20	169	TRUE
D_0__Bacteria;D_1__Firmicutes;D_2__Erysipelotrichia;D_3__Erysipelotrichales;D_4__Erysipelotrichaceae;D_5__Allobaculum;D_6__uncultured Allobaculum sp.	0	0	0	0	9	0	9	FALSE
D_0__Bacteria;D_1__Firmicutes;D_2__Erysipelotrichia;D_3__Erysipelotrichales;D_4__Erysipelotrichaceae;D_5__Allobaculum;__	0	0	0	8	44	23	75	TRUE
D_0__Bacteria;D_1__Firmicutes;D_2__Erysipelotrichia;D_3__Erysipelotrichales;D_4__Erysipelotrichaceae;D_5__Coprobacillus;D_6__Coprobacillus cateniformis JCM 10604	0	0	0	0	4	0	4	FALSE
D_0__Bacteria;D_1__Firmicutes;D_2__Erysipelotrichia;D_3__Erysipelotrichales;D_4__Erysipelotrichaceae;D_5__Dubosiella;D_6__Dubosiella newyorkensis	0	0	0	0	16	0	16	FALSE
D_0__Bacteria;D_1__Firmicutes;D_2__Erysipelotrichia;D_3__Erysipelotrichales;D_4__Erysipelotrichaceae;D_5__Dubosiella;D_6__uncultured Erysipelotrichales bacterium	0	0	0	0	142	57	199	TRUE
D_0__Bacteria;D_1__Firmicutes;D_2__Erysipelotrichia;D_3__Erysipelotrichales;D_4__Erysipelotrichaceae;D_5__Erysipelatoclostridium;D_6__Massiliomicrobiota timonensis	0	0	0	0	6	0	6	FALSE
D_0__Bacteria;D_1__Firmicutes;D_2__Erysipelotrichia;D_3__Erysipelotrichales;D_4__Erysipelotrichaceae;D_5__Erysipelatoclostridium;D_6__uncultured Firmicutes bacterium	0	0	0	6	0	0	6	FALSE
D_0__Bacteria;D_1__Firmicutes;D_2__Erysipelotrichia;D_3__Erysipelotrichales;D_4__Erysipelotrichaceae;D_5__Erysipelatoclostridium;__	2	0	0	0	0	13	15	FALSE
D_0__Bacteria;D_1__Firmicutes;D_2__Erysipelotrichia;D_3__Erysipelotrichales;D_4__Erysipelotrichaceae;D_5__Erysipelotrichaceae UCG-003;__	0	0	0	15	14	40	69	TRUE
D_0__Bacteria;D_1__Firmicutes;D_2__Erysipelotrichia;D_3__Erysipelotrichales;D_4__Erysipelotrichaceae;D_5__Faecalibaculum;D_6__Faecalibaculum rodentium	0	0	0	60	340	132	532	TRUE
D_0__Bacteria;D_1__Firmicutes;D_2__Erysipelotrichia;D_3__Erysipelotrichales;D_4__Erysipelotrichaceae;D_5__Holdemanella;__	0	0	0	0	23	6	29	FALSE
D_0__Bacteria;D_1__Firmicutes;D_2__Erysipelotrichia;D_3__Erysipelotrichales;D_4__Erysipelotrichaceae;D_5__Holdemania;D_6__Holdemania massiliensis AP2	0	0	0	0	5	0	5	FALSE
D_0__Bacteria;D_1__Firmicutes;D_2__Erysipelotrichia;D_3__Erysipelotrichales;D_4__Erysipelotrichaceae;D_5__Ileibacterium;D_6__Erysipelotrichaceae bacterium NYU-BL-F16	0	0	0	25	47	37	109	TRUE
D_0__Bacteria;D_1__Firmicutes;D_2__Erysipelotrichia;D_3__Erysipelotrichales;D_4__Erysipelotrichaceae;D_5__Solobacterium;D_6__unidentified	0	0	0	0	6	9	15	FALSE
D_0__Bacteria;D_1__Firmicutes;D_2__Erysipelotrichia;D_3__Erysipelotrichales;D_4__Erysipelotrichaceae;D_5__Turicibacter;__	0	0	0	0	33	0	33	FALSE
D_0__Bacteria;D_1__Firmicutes;D_2__Erysipelotrichia;D_3__Erysipelotrichales;D_4__Erysipelotrichaceae;D_5__[Clostridium] innocuum group;__	0	0	0	0	16	0	16	FALSE
D_0__Bacteria;D_1__Firmicutes;D_2__Erysipelotrichia;D_3__Erysipelotrichales;D_4__Erysipelotrichaceae;D_5__uncultured;D_6__uncultured Allobaculum sp.	0	0	0	0	10	16	26	FALSE
D_0__Bacteria;D_1__Firmicutes;D_2__Negativicutes;D_3__Selenomonadales;D_4__Acidaminococcaceae;D_5__Phascolarctobacterium;D_6__uncultured Firmicutes bacterium	0	0	0	23	37	216	276	TRUE
D_0__Bacteria;D_1__Firmicutes;D_2__Negativicutes;D_3__Selenomonadales;D_4__Acidaminococcaceae;D_5__Phascolarctobacterium;D_6__wallaby gut metagenome	0	0	0	13	8	26	47	FALSE
D_0__Bacteria;D_1__Firmicutes;D_2__Negativicutes;D_3__Selenomonadales;D_4__Acidaminococcaceae;D_5__Phascolarctobacterium;__	0	0	0	0	14	20	34	FALSE
D_0__Bacteria;D_1__Firmicutes;D_2__Negativicutes;D_3__Selenomonadales;D_4__Acidaminococcaceae;D_5__uncultured;D_6__uncultured low G+C Gram-positive bacterium	0	0	0	7	7	0	14	FALSE
D_0__Bacteria;D_1__Firmicutes;D_2__Negativicutes;D_3__Selenomonadales;D_4__Veillonellaceae;D_5__Anaerovibrio;D_6__uncultured Anaerovibrio sp.	0	0	0	0	0	16	16	FALSE
D_0__Bacteria;D_1__Firmicutes;D_2__Negativicutes;D_3__Selenomonadales;D_4__Veillonellaceae;D_5__Dialister;D_6__gut metagenome	0	0	0	0	0	9	9	FALSE
D_0__Bacteria;D_1__Firmicutes;D_2__Negativicutes;D_3__Selenomonadales;D_4__Veillonellaceae;D_5__Megamonas;D_6__Megamonas funiformis YIT 11815	0	0	0	47	75	253	375	TRUE
D_0__Bacteria;D_1__Firmicutes;D_2__Negativicutes;D_3__Selenomonadales;D_4__Veillonellaceae;D_5__Megasphaera;D_6__Veillonellaceae bacterium KA00182	0	0	0	4	0	0	4	FALSE
D_0__Bacteria;D_1__Firmicutes;D_2__Negativicutes;D_3__Selenomonadales;D_4__Veillonellaceae;D_5__Megasphaera;__	0	0	0	0	10	10	20	FALSE
D_0__Bacteria;D_1__Firmicutes;D_2__Negativicutes;D_3__Selenomonadales;D_4__Veillonellaceae;D_5__Mitsuokella;D_6__Mitsuokella jalaludinii	0	0	0	0	7	0	7	FALSE
D_0__Bacteria;D_1__Firmicutes;D_2__Negativicutes;D_3__Selenomonadales;D_4__Veillonellaceae;D_5__Veillonella;__	0	0	0	7	29	19	55	TRUE
D_0__Bacteria;D_1__Firmicutes;D_2__Negativicutes;D_3__Selenomonadales;D_4__Veillonellaceae;D_5__uncultured;D_6__uncultured bacterium SJA-112	0	0	0	12	14	0	26	FALSE
D_0__Bacteria;D_1__Firmicutes;D_2__Negativicutes;D_3__Selenomonadales;D_4__Veillonellaceae;__;__	0	0	0	16	0	0	16	FALSE
D_0__Bacteria;D_1__Firmicutes;__;__;__;__;__	86	3	81	39	82	83	374	TRUE
D_0__Bacteria;D_1__Fusobacteria;D_2__Fusobacteriia;D_3__Fusobacteriales;D_4__Fusobacteriaceae;D_5__Cetobacterium;D_6__Oryzias latipes (Japanese medaka)	0	0	0	0	6	11	17	FALSE
D_0__Bacteria;D_1__Fusobacteria;D_2__Fusobacteriia;D_3__Fusobacteriales;D_4__Fusobacteriaceae;D_5__Fusobacterium;D_6__uncultured Fusobacteria bacterium	0	0	0	0	0	10	10	FALSE
D_0__Bacteria;D_1__Fusobacteria;D_2__Fusobacteriia;D_3__Fusobacteriales;D_4__Leptotrichiaceae;D_5__Leptotrichia;D_6__Leptotrichia sp. oral clone GT018	0	0	0	0	8	6	14	FALSE
D_0__Bacteria;D_1__GN01;D_2__uncultured Methylococcus sp.;D_3__;D_4__;D_5__;D_6__	0	0	0	0	20	24	44	FALSE
D_0__Bacteria;D_1__Gemmatimonadetes;D_2__BD2-11 terrestrial group;D_3__Gemmatimonadetes bacterium SCGC AAA240-J22;D_4__;D_5__;D_6__	0	0	213	0	0	0	213	TRUE
D_0__Bacteria;D_1__Gemmatimonadetes;D_2__BD2-11 terrestrial group;D_3__metagenome;D_4__;D_5__;D_6__	0	0	0	0	8	0	8	FALSE
D_0__Bacteria;D_1__Gemmatimonadetes;D_2__BD2-11 terrestrial group;D_3__uncultured marine microorganism;D_4__;D_5__;D_6__	0	0	0	0	10	0	10	FALSE
D_0__Bacteria;D_1__Gemmatimonadetes;D_2__BD2-11 terrestrial group;D_3__unidentified bacterium wb1_A18;D_4__;D_5__;D_6__	0	0	189	0	7	0	196	TRUE
D_0__Bacteria;D_1__Gemmatimonadetes;D_2__BD2-11 terrestrial group;__;__;__;__	0	0	87	0	13	0	100	TRUE
D_0__Bacteria;D_1__Gemmatimonadetes;D_2__Gemmatimonadetes;D_3__Gemmatimonadales;D_4__Gemmatimonadaceae;D_5__uncultured;D_6__denitrifying bacterium enrichment culture clone NOB_2_F8	0	0	0	0	10	0	10	FALSE
D_0__Bacteria;D_1__Gemmatimonadetes;D_2__Gemmatimonadetes;D_3__Gemmatimonadales;D_4__Gemmatimonadaceae;D_5__uncultured;D_6__uncultured organism	47	0	0	10	69	21	147	TRUE
D_0__Bacteria;D_1__Gemmatimonadetes;D_2__Gemmatimonadetes;D_3__Gemmatimonadales;D_4__Gemmatimonadaceae;D_5__uncultured;__	0	0	0	0	4	0	4	FALSE
D_0__Bacteria;D_1__Gemmatimonadetes;D_2__Gemmatimonadetes;D_3__Gemmatimonadales;D_4__Gemmatimonadaceae;__;__	0	0	0	3	5	11	19	FALSE
D_0__Bacteria;D_1__Gemmatimonadetes;D_2__MD2902-B12;D_3__uncultured microorganism;D_4__;D_5__;D_6__	0	0	0	29	15	42	86	TRUE
D_0__Bacteria;D_1__Gemmatimonadetes;D_2__PAUC43f marine benthic group;D_3__saltmarsh clone LCP-68;D_4__;D_5__;D_6__	77	298	172	37	56	15	655	TRUE
D_0__Bacteria;D_1__Gemmatimonadetes;D_2__PAUC43f marine benthic group;D_3__uncultured forest soil bacterium;D_4__;D_5__;D_6__	0	0	126	0	0	0	126	TRUE
D_0__Bacteria;D_1__Hydrogenedentes;D_2__Hydrogenedentia;D_3__Hydrogenedentiales;D_4__Hydrogenedensaceae;D_5__Candidatus Hydrogenedens;D_6__Hydrogenedentes bacterium JGI 0000039-J10	0	0	0	12	0	0	12	FALSE
D_0__Bacteria;D_1__Kiritimatiellaeota;D_2__Kiritimatiellae;D_3__Kiritimatiellales;D_4__Kiritimatiellaceae;D_5__R76-B128;D_6__marine metagenome	0	0	0	0	8	0	8	FALSE
D_0__Bacteria;D_1__Kiritimatiellaeota;D_2__Kiritimatiellae;D_3__Kiritimatiellales;D_4__Kiritimatiellaceae;D_5__R76-B128;D_6__uncultured marine bacterium	0	0	0	0	0	9	9	FALSE
D_0__Bacteria;D_1__Kiritimatiellaeota;D_2__Kiritimatiellae;D_3__WCHB1-41;D_4__Lentisphaerae bacterium RIFOXYC12_FULL_60_16;D_5__;D_6__	0	0	0	0	0	8	8	FALSE
D_0__Bacteria;D_1__Kiritimatiellaeota;D_2__Kiritimatiellae;D_3__WCHB1-41;__;__;__	90	70	0	0	0	0	160	TRUE
D_0__Bacteria;D_1__Kiritimatiellaeota;D_2__Kiritimatiellae;__;__;__;__	46	50	0	0	16	0	112	TRUE
D_0__Bacteria;D_1__LCP-89;D_2__saltmarsh clone LCP-89;D_3__;D_4__;D_5__;D_6__	0	0	0	17	19	22	58	TRUE
D_0__Bacteria;D_1__LCP-89;D_2__uncultured organism;D_3__;D_4__;D_5__;D_6__	0	0	0	0	17	0	17	FALSE
D_0__Bacteria;D_1__LCP-89;__;__;__;__;__	0	0	0	30	0	20	50	TRUE
D_0__Bacteria;D_1__Latescibacteria;D_2__Latescibacteria bacterium DG_63;D_3__;D_4__;D_5__;D_6__	260	239	764	1019	678	1120	4080	TRUE
D_0__Bacteria;D_1__Latescibacteria;D_2__Latescibacteria;D_3__Latescibacterales;D_4__Latescibacteraceae;D_5__Candidatus Latescibacter;D_6__Candidatus Latescibacter anaerobius SCGC AAA252-E07	0	0	0	33	0	0	33	FALSE
D_0__Bacteria;D_1__Latescibacteria;D_2__Latescibacteria;D_3__Latescibacterales;D_4__Latescibacteraceae;D_5__Candidatus Latescibacter;D_6__Latescibacteria bacterium SCGC AAA252-D10	0	0	0	17	11	0	28	FALSE
D_0__Bacteria;D_1__Latescibacteria;D_2__Latescibacteria;D_3__Latescibacterales;D_4__Latescibacteraceae;D_5__Candidatus Latescibacter;D_6__metagenome	0	0	0	29	22	35	86	TRUE
D_0__Bacteria;D_1__Latescibacteria;D_2__Latescibacteria;D_3__Latescibacterales;D_4__Latescibacteraceae;D_5__Candidatus Latescibacter;__	0	0	0	96	0	123	219	TRUE
D_0__Bacteria;D_1__Latescibacteria;D_2__Latescibacteria;D_3__Latescibacterales;D_4__Latescibacteraceae;D_5__Latescibacteria bacterium SCGC AAA257-K07;D_6__	0	0	0	0	4	0	4	FALSE
D_0__Bacteria;D_1__Latescibacteria;D_2__Latescibacteria;D_3__Latescibacterales;D_4__Latescibacteraceae;D_5__bacterium enrichment culture clone 30(2013);D_6__	186	201	212	23	35	57	714	TRUE
D_0__Bacteria;D_1__Latescibacteria;D_2__Latescibacteria;D_3__Latescibacterales;D_4__Latescibacteraceae;D_5__uncultured sediment bacterium;D_6__	0	19	0	32	27	62	140	TRUE
D_0__Bacteria;D_1__Latescibacteria;D_2__Latescibacteria;D_3__Latescibacterales;D_4__Latescibacteraceae;__;__	0	0	2	24	0	47	73	TRUE
D_0__Bacteria;D_1__Latescibacteria;D_2__bacterium enrichment culture clone 58;D_3__;D_4__;D_5__;D_6__	224	65	0	37	34	54	414	TRUE
D_0__Bacteria;D_1__Latescibacteria;D_2__uncultured Bacteroidetes bacterium;D_3__;D_4__;D_5__;D_6__	0	138	47	14	0	0	199	TRUE
D_0__Bacteria;D_1__Latescibacteria;D_2__uncultured Gemmatimonadetes bacterium;D_3__;D_4__;D_5__;D_6__	22	39	0	6	0	0	67	TRUE
D_0__Bacteria;D_1__Latescibacteria;D_2__uncultured Pelobacter sp.;D_3__;D_4__;D_5__;D_6__	0	0	0	0	0	5	5	FALSE
D_0__Bacteria;D_1__Latescibacteria;D_2__uncultured Planctomycetales bacterium;D_3__;D_4__;D_5__;D_6__	0	0	0	38	33	53	124	TRUE
D_0__Bacteria;D_1__Latescibacteria;D_2__uncultured bacterium mle1-16;D_3__;D_4__;D_5__;D_6__	0	22	0	0	0	0	22	FALSE
D_0__Bacteria;D_1__Latescibacteria;D_2__uncultured delta proteobacterium;D_3__;D_4__;D_5__;D_6__	30	0	0	0	0	0	30	FALSE
D_0__Bacteria;D_1__Latescibacteria;D_2__uncultured proteobacterium;D_3__;D_4__;D_5__;D_6__	0	0	37	0	0	9	46	FALSE
D_0__Bacteria;D_1__Latescibacteria;D_2__uncultured soil bacterium PBS-III-30;D_3__;D_4__;D_5__;D_6__	74	187	268	26	18	40	613	TRUE
D_0__Bacteria;D_1__Latescibacteria;D_2__uncultured soil bacterium;D_3__;D_4__;D_5__;D_6__	0	0	0	0	6	0	6	FALSE
D_0__Bacteria;D_1__Latescibacteria;__;__;__;__;__	79	74	122	288	108	132	803	TRUE
D_0__Bacteria;D_1__Modulibacteria;D_2__Moduliflexia;D_3__Moduliflexales;D_4__Moduliflexaceae;D_5__uncultured delta proteobacterium;D_6__	0	0	0	0	34	0	34	FALSE
D_0__Bacteria;D_1__Nitrospinae;D_2__MT5B39;D_3__Nitrospinae bacterium RIFCSPLOWO2_12_FULL_45_22;D_4__;D_5__;D_6__	0	0	0	7	0	0	7	FALSE
D_0__Bacteria;D_1__Nitrospinae;D_2__Nitrospinia;D_3__Nitrospinales;D_4__Nitrospinaceae;__;__	0	0	22	0	0	0	22	FALSE
D_0__Bacteria;D_1__Nitrospirae;D_2__4-29-1;D_3__uncultured Nitrospirae bacterium;D_4__;D_5__;D_6__	0	0	0	44	36	47	127	TRUE
D_0__Bacteria;D_1__Nitrospirae;D_2__4-29-1;D_3__uncultured prokaryote;D_4__;D_5__;D_6__	0	0	0	20	31	0	51	TRUE
D_0__Bacteria;D_1__Nitrospirae;D_2__4-29-1;D_3__uncultured proteobacterium;D_4__;D_5__;D_6__	0	0	0	8	0	13	21	FALSE
D_0__Bacteria;D_1__Nitrospirae;D_2__4-29-1;__;__;__;__	0	0	0	442	359	418	1219	TRUE
D_0__Bacteria;D_1__Nitrospirae;D_2__Nitrospira;D_3__Nitrospirales;D_4__Nitrospiraceae;D_5__Nitrospira;D_6__Nitrospira sp. enrichment culture clone LUA16	0	0	0	0	15	0	15	FALSE
D_0__Bacteria;D_1__Nitrospirae;D_2__Nitrospira;D_3__Nitrospirales;D_4__Nitrospiraceae;D_5__Nitrospira;D_6__uncultured Cytophaga sp.	0	0	0	0	18	0	18	FALSE
D_0__Bacteria;D_1__Nitrospirae;D_2__Nitrospira;D_3__Nitrospirales;D_4__Nitrospiraceae;D_5__Nitrospira;D_6__unidentified bacterium wb1_C17	0	0	40	0	0	0	40	FALSE
D_0__Bacteria;D_1__Nitrospirae;D_2__Nitrospira;D_3__Nitrospirales;D_4__Nitrospiraceae;D_5__Nitrospira;__	0	0	0	12	0	30	42	FALSE
D_0__Bacteria;D_1__Nitrospirae;D_2__Thermodesulfovibrionia;D_3__uncultured;D_4__Nitrospirae bacterium GWF2_44_13;D_5__;D_6__	0	0	0	12	17	12	41	FALSE
D_0__Bacteria;D_1__Nitrospirae;D_2__Thermodesulfovibrionia;D_3__uncultured;D_4__saltmarsh clone LCP-6;D_5__;D_6__	0	0	56	91	60	79	286	TRUE
D_0__Bacteria;D_1__Nitrospirae;D_2__Thermodesulfovibrionia;D_3__uncultured;D_4__uncultured Acidobacteria bacterium;D_5__;D_6__	0	0	0	684	421	530	1635	TRUE
D_0__Bacteria;D_1__Nitrospirae;D_2__Thermodesulfovibrionia;D_3__uncultured;D_4__uncultured Nitrospira sp.;D_5__;D_6__	0	0	0	10	0	0	10	FALSE
D_0__Bacteria;D_1__Nitrospirae;D_2__Thermodesulfovibrionia;D_3__uncultured;D_4__uncultured Sphingobacteriales bacterium;D_5__;D_6__	0	0	0	9	0	11	20	FALSE
D_0__Bacteria;D_1__Nitrospirae;D_2__Thermodesulfovibrionia;D_3__uncultured;D_4__uncultured prokaryote;D_5__;D_6__	0	0	0	102	41	68	211	TRUE
D_0__Bacteria;D_1__Nitrospirae;D_2__Thermodesulfovibrionia;D_3__uncultured;__;__;__	298	362	182	53	32	33	960	TRUE
D_0__Bacteria;D_1__Omnitrophicaeota;D_2__Candidatus Omnitrophica bacterium 4484_70.1;D_3__;D_4__;D_5__;D_6__	0	0	0	0	6	0	6	FALSE
D_0__Bacteria;D_1__Omnitrophicaeota;D_2__Omnitrophia;D_3__Omnitrophales;D_4__Omnitrophaceae;D_5__Candidatus Omnitrophus;D_6__Omnitrophica bacterium RIFCSPLOWO2_12_FULL_44_17	0	0	0	0	0	2	2	FALSE
D_0__Bacteria;D_1__Omnitrophicaeota;D_2__Omnitrophia;D_3__Omnitrophales;D_4__Omnitrophaceae;D_5__Candidatus Omnitrophus;D_6__uncultured organism	0	0	0	0	4	0	4	FALSE
D_0__Bacteria;D_1__Omnitrophicaeota;D_2__Omnitrophica WOR_2 bacterium GWF2_63_9;D_3__;D_4__;D_5__;D_6__	0	0	0	0	12	0	12	FALSE
D_0__Bacteria;D_1__Omnitrophicaeota;D_2__Omnitrophica WOR_2 bacterium RIFOXYA2_FULL_38_17;D_3__;D_4__;D_5__;D_6__	0	0	0	0	14	0	14	FALSE
D_0__Bacteria;D_1__Omnitrophicaeota;D_2__uncultured Banisveld landfill bacterium BVC56;D_3__;D_4__;D_5__;D_6__	0	0	0	22	18	51	91	TRUE
D_0__Bacteria;D_1__Omnitrophicaeota;D_2__uncultured Latescibacteria bacterium;D_3__;D_4__;D_5__;D_6__	0	0	0	17	9	27	53	TRUE
D_0__Bacteria;D_1__Omnitrophicaeota;__;__;__;__;__	0	0	0	19	10	22	51	TRUE
D_0__Bacteria;D_1__PAUC34f;__;__;__;__;__	0	0	0	17	0	16	33	FALSE
D_0__Bacteria;D_1__Patescibacteria;D_2__ABY1;D_3__Candidatus Falkowbacteria;D_4__marine metagenome;D_5__;D_6__	0	0	0	0	10	0	10	FALSE
D_0__Bacteria;D_1__Patescibacteria;D_2__ABY1;D_3__Candidatus Falkowbacteria;__;__;__	2	0	0	0	0	0	2	FALSE
D_0__Bacteria;D_1__Patescibacteria;D_2__ABY1;__;__;__;__	0	0	0	0	4	0	4	FALSE
D_0__Bacteria;D_1__Patescibacteria;D_2__Gracilibacteria;D_3__Candidatus Peregrinibacteria;__;__;__	0	2	0	0	0	0	2	FALSE
D_0__Bacteria;D_1__Patescibacteria;D_2__Gracilibacteria;D_3__bacterium enrichment culture clone 24(2013);D_4__;D_5__;D_6__	0	0	0	0	9	0	9	FALSE
D_0__Bacteria;D_1__Patescibacteria;D_2__Microgenomatia;D_3__Candidatus Levybacteria;__;__;__	0	0	0	0	0	2	2	FALSE
D_0__Bacteria;D_1__Patescibacteria;D_2__Microgenomatia;D_3__Candidatus Woesebacteria;__;__;__	0	0	0	0	3	0	3	FALSE
D_0__Bacteria;D_1__Patescibacteria;D_2__Parcubacteria;__;__;__;__	0	0	0	0	2	0	2	FALSE
D_0__Bacteria;D_1__Patescibacteria;D_2__Saccharimonadia;D_3__Saccharimonadales;D_4__Saccharimonadaceae;__;__	0	0	0	0	8	0	8	FALSE
D_0__Bacteria;D_1__Patescibacteria;D_2__Saccharimonadia;D_3__Saccharimonadales;D_4__uncultured organism;D_5__;D_6__	0	0	2	0	0	0	2	FALSE
D_0__Bacteria;D_1__Patescibacteria;D_2__Saccharimonadia;D_3__Saccharimonadales;__;__;__	0	0	0	5	6	12	23	FALSE
D_0__Bacteria;D_1__Patescibacteria;__;__;__;__;__	0	0	0	0	0	8	8	FALSE
D_0__Bacteria;D_1__Planctomycetes;D_2__Brocadiae;D_3__SM23-32;D_4__uncultured bacterium;D_5__;D_6__	0	0	0	2	0	0	2	FALSE
D_0__Bacteria;D_1__Planctomycetes;D_2__OM190;D_3__unidentified bacterium wb1_D18;D_4__;D_5__;D_6__	9	0	0	0	11	6	26	FALSE
D_0__Bacteria;D_1__Planctomycetes;D_2__Phycisphaerae;D_3__B103G10;D_4__uncultured bacterium;D_5__;D_6__	0	0	0	0	0	8	8	FALSE
D_0__Bacteria;D_1__Planctomycetes;D_2__Phycisphaerae;D_3__CCM11a;D_4__bacterium enrichment culture clone E27;D_5__;D_6__	0	0	0	17	0	0	17	FALSE
D_0__Bacteria;D_1__Planctomycetes;D_2__Phycisphaerae;D_3__CCM11a;D_4__uncultured deep-sea bacterium;D_5__;D_6__	0	0	0	0	11	0	11	FALSE
D_0__Bacteria;D_1__Planctomycetes;D_2__Phycisphaerae;D_3__CCM11a;D_4__uncultured organism;D_5__;D_6__	0	0	0	0	15	0	15	FALSE
D_0__Bacteria;D_1__Planctomycetes;D_2__Phycisphaerae;D_3__MSBL9;D_4__4572-13;D_5__uncultured organism;D_6__	0	0	0	55	39	16	110	TRUE
D_0__Bacteria;D_1__Planctomycetes;D_2__Phycisphaerae;D_3__MSBL9;D_4__4572-13;D_5__uncultured planctomycete;D_6__	0	0	22	0	8	0	30	FALSE
D_0__Bacteria;D_1__Planctomycetes;D_2__Phycisphaerae;D_3__MSBL9;D_4__4572-13;__;__	0	0	0	0	0	34	34	FALSE
D_0__Bacteria;D_1__Planctomycetes;D_2__Phycisphaerae;D_3__MSBL9;D_4__GWC2-45-44;D_5__Planctomycetes bacterium GWF2_41_51;D_6__	0	0	0	4	0	0	4	FALSE
D_0__Bacteria;D_1__Planctomycetes;D_2__Phycisphaerae;D_3__MSBL9;D_4__GWC2-45-44;D_5__uncultured soil bacterium;D_6__	0	0	0	0	0	10	10	FALSE
D_0__Bacteria;D_1__Planctomycetes;D_2__Phycisphaerae;D_3__MSBL9;D_4__L21-RPul-D3;D_5__uncultured planctomycete;D_6__	0	0	26	0	0	0	26	FALSE
D_0__Bacteria;D_1__Planctomycetes;D_2__Phycisphaerae;D_3__MSBL9;D_4__SG8-4;D_5__Phycisphaerales bacterium Planc_01;D_6__	0	0	19	59	38	98	214	TRUE
D_0__Bacteria;D_1__Planctomycetes;D_2__Phycisphaerae;D_3__MSBL9;D_4__SG8-4;D_5__bacterium enrichment culture clone AOM-SR-B13;D_6__	0	0	0	0	0	18	18	FALSE
D_0__Bacteria;D_1__Planctomycetes;D_2__Phycisphaerae;D_3__MSBL9;D_4__SG8-4;D_5__metagenome;D_6__	0	0	0	165	92	149	406	TRUE
D_0__Bacteria;D_1__Planctomycetes;D_2__Phycisphaerae;D_3__MSBL9;D_4__SG8-4;D_5__uncultured microorganism;D_6__	0	0	36	456	386	798	1676	TRUE
D_0__Bacteria;D_1__Planctomycetes;D_2__Phycisphaerae;D_3__MSBL9;D_4__SG8-4;__;__	36	13	7	202	99	375	732	TRUE
D_0__Bacteria;D_1__Planctomycetes;D_2__Phycisphaerae;D_3__MSBL9;D_4__SM23-30;D_5__Phycisphaerae bacterium SM23_30;D_6__	0	0	0	0	0	7	7	FALSE
D_0__Bacteria;D_1__Planctomycetes;D_2__Phycisphaerae;D_3__MSBL9;D_4__uncultured bacterium;D_5__;D_6__	0	0	0	10	10	0	20	FALSE
D_0__Bacteria;D_1__Planctomycetes;D_2__Phycisphaerae;D_3__MSBL9;__;__;__	26	0	0	115	69	113	323	TRUE
D_0__Bacteria;D_1__Planctomycetes;D_2__Phycisphaerae;D_3__Phycisphaerales;D_4__AKAU3564 sediment group;D_5__uncultured Phycisphaerales bacterium;D_6__	0	0	0	10	8	0	18	FALSE
D_0__Bacteria;D_1__Planctomycetes;D_2__Phycisphaerae;D_3__Phycisphaerales;D_4__AKAU3564 sediment group;__;__	0	67	0	0	0	0	67	TRUE
D_0__Bacteria;D_1__Planctomycetes;D_2__Phycisphaerae;D_3__Phycisphaerales;D_4__Phycisphaeraceae;D_5__SM1A02;D_6__uncultured Planctomycetales bacterium HF0500_02G17	0	0	6	0	0	0	6	FALSE
D_0__Bacteria;D_1__Planctomycetes;D_2__Phycisphaerae;D_3__Phycisphaerales;D_4__Phycisphaeraceae;D_5__SM1A02;__	0	0	0	0	3	0	3	FALSE
D_0__Bacteria;D_1__Planctomycetes;D_2__Phycisphaerae;D_3__Phycisphaerales;D_4__Phycisphaeraceae;D_5__uncultured;D_6__uncultured forest soil bacterium	0	2	0	0	0	0	2	FALSE
D_0__Bacteria;D_1__Planctomycetes;D_2__Phycisphaerae;D_3__Phycisphaerales;D_4__Phycisphaeraceae;__;__	25	43	158	0	0	0	226	TRUE
D_0__Bacteria;D_1__Planctomycetes;D_2__Phycisphaerae;D_3__Phycisphaerales;__;__;__	0	3	0	0	0	0	3	FALSE
D_0__Bacteria;D_1__Planctomycetes;D_2__Phycisphaerae;D_3__S-70;D_4__groundwater metagenome;D_5__;D_6__	0	0	0	0	2	0	2	FALSE
D_0__Bacteria;D_1__Planctomycetes;D_2__Phycisphaerae;D_3__Tepidisphaerales;D_4__Tepidisphaeraceae;D_5__Tepidisphaera;D_6__Tepidisphaera mucosa	0	0	0	0	8	0	8	FALSE
D_0__Bacteria;D_1__Planctomycetes;D_2__Phycisphaerae;D_3__mle1-8;D_4__uncultured Planctomycetales bacterium;D_5__;D_6__	0	0	0	0	0	31	31	FALSE
D_0__Bacteria;D_1__Planctomycetes;D_2__Phycisphaerae;D_3__mle1-8;__;__;__	25	0	43	0	0	0	68	TRUE
D_0__Bacteria;D_1__Planctomycetes;D_2__Phycisphaerae;__;__;__;__	26	44	125	22	37	118	372	TRUE
D_0__Bacteria;D_1__Planctomycetes;D_2__Pla3 lineage;D_3__metagenome;D_4__;D_5__;D_6__	0	0	0	5	0	11	16	FALSE
D_0__Bacteria;D_1__Planctomycetes;D_2__Pla3 lineage;D_3__uncultured soil bacterium PBS-II-37;D_4__;D_5__;D_6__	0	0	0	85	77	90	252	TRUE
D_0__Bacteria;D_1__Planctomycetes;D_2__Pla3 lineage;__;__;__;__	0	0	0	18	19	13	50	TRUE
D_0__Bacteria;D_1__Planctomycetes;D_2__Pla4 lineage;D_3__uncultured soil bacterium PBS-114;D_4__;D_5__;D_6__	0	0	0	8	0	0	8	FALSE
D_0__Bacteria;D_1__Planctomycetes;D_2__Planctomycetacia;D_3__Gemmatales;D_4__Gemmataceae;D_5__Gemmata;D_6__Gemmata-like str. CJuql4	13	0	0	0	0	0	13	FALSE
D_0__Bacteria;D_1__Planctomycetes;D_2__Planctomycetacia;D_3__Gemmatales;D_4__Gemmataceae;D_5__uncultured;D_6__Gemmata sp. SD2-6	0	22	0	0	0	0	22	FALSE
D_0__Bacteria;D_1__Planctomycetes;D_2__Planctomycetacia;D_3__Gemmatales;D_4__Gemmataceae;D_5__uncultured;D_6__Planctomycetia bacterium WSF3-27	15	0	29	0	0	0	44	FALSE
D_0__Bacteria;D_1__Planctomycetes;D_2__Planctomycetacia;D_3__Gemmatales;D_4__Gemmataceae;D_5__uncultured;D_6__bacterium enrichment culture clone B145(2011)	0	0	36	0	0	12	48	FALSE
D_0__Bacteria;D_1__Planctomycetes;D_2__Planctomycetacia;D_3__Gemmatales;D_4__Gemmataceae;D_5__uncultured;D_6__planctomycete WY69	0	2	43	0	0	0	45	FALSE
D_0__Bacteria;D_1__Planctomycetes;D_2__Planctomycetacia;D_3__Gemmatales;D_4__Gemmataceae;D_5__uncultured;__	13	0	0	0	4	0	17	FALSE
D_0__Bacteria;D_1__Planctomycetes;D_2__Planctomycetacia;D_3__Gemmatales;D_4__Gemmataceae;__;__	94	28	76	0	0	0	198	TRUE
D_0__Bacteria;D_1__Planctomycetes;D_2__Planctomycetacia;D_3__Isosphaerales;D_4__Isosphaeraceae;D_5__uncultured;__	0	2	0	0	0	0	2	FALSE
D_0__Bacteria;D_1__Planctomycetes;D_2__Planctomycetacia;D_3__Isosphaerales;D_4__Isosphaeraceae;__;__	7	52	48	0	0	0	107	TRUE
D_0__Bacteria;D_1__Planctomycetes;D_2__Planctomycetacia;D_3__Pirellulales;D_4__Pirellulaceae;D_5__Blastopirellula;D_6__planctomycete MS1316	0	61	0	0	0	0	61	TRUE
D_0__Bacteria;D_1__Planctomycetes;D_2__Planctomycetacia;D_3__Pirellulales;D_4__Pirellulaceae;D_5__Blastopirellula;D_6__uncultured Planctomycetaceae bacterium	62	0	0	0	0	0	62	TRUE
D_0__Bacteria;D_1__Planctomycetes;D_2__Planctomycetacia;D_3__Pirellulales;D_4__Pirellulaceae;D_5__Blastopirellula;__	0	125	148	0	0	0	273	TRUE
D_0__Bacteria;D_1__Planctomycetes;D_2__Planctomycetacia;D_3__Pirellulales;D_4__Pirellulaceae;D_5__Pir3 lineage;__	0	0	0	0	8	0	8	FALSE
D_0__Bacteria;D_1__Planctomycetes;D_2__Planctomycetacia;D_3__Pirellulales;D_4__Pirellulaceae;D_5__Pir4 lineage;D_6__Planctomycetes bacterium RBG_16_64_12	45	0	0	0	0	0	45	FALSE
D_0__Bacteria;D_1__Planctomycetes;D_2__Planctomycetacia;D_3__Pirellulales;D_4__Pirellulaceae;D_5__Pir4 lineage;D_6__planctomycete DDSe1305	0	0	0	0	9	0	9	FALSE
D_0__Bacteria;D_1__Planctomycetes;D_2__Planctomycetacia;D_3__Pirellulales;D_4__Pirellulaceae;D_5__Pir4 lineage;D_6__planctomycete DDSe3021	0	0	509	0	0	0	509	TRUE
D_0__Bacteria;D_1__Planctomycetes;D_2__Planctomycetacia;D_3__Pirellulales;D_4__Pirellulaceae;D_5__Pir4 lineage;D_6__uncultured Pasteuria sp.	522	0	0	0	0	0	522	TRUE
D_0__Bacteria;D_1__Planctomycetes;D_2__Planctomycetacia;D_3__Pirellulales;D_4__Pirellulaceae;D_5__Pir4 lineage;__	0	669	0	0	0	0	669	TRUE
D_0__Bacteria;D_1__Planctomycetes;D_2__Planctomycetacia;D_3__Pirellulales;D_4__Pirellulaceae;D_5__Pirellula;D_6__uncultured Pasteuria sp.	0	0	0	2	0	0	2	FALSE
D_0__Bacteria;D_1__Planctomycetes;D_2__Planctomycetacia;D_3__Pirellulales;D_4__Pirellulaceae;D_5__Pirellula;D_6__uncultured organism	57	47	0	0	0	0	104	TRUE
D_0__Bacteria;D_1__Planctomycetes;D_2__Planctomycetacia;D_3__Pirellulales;D_4__Pirellulaceae;D_5__Rhodopirellula;D_6__bacterium WH5-6	87	0	0	0	0	0	87	TRUE
D_0__Bacteria;D_1__Planctomycetes;D_2__Planctomycetacia;D_3__Pirellulales;D_4__Pirellulaceae;D_5__Rhodopirellula;D_6__uncultured hydrocarbon seep bacterium BPC061	0	0	89	0	0	0	89	TRUE
D_0__Bacteria;D_1__Planctomycetes;D_2__Planctomycetacia;D_3__Pirellulales;D_4__Pirellulaceae;D_5__Rubripirellula;__	0	369	0	0	0	0	369	TRUE
D_0__Bacteria;D_1__Planctomycetes;D_2__Planctomycetacia;D_3__Pirellulales;D_4__Pirellulaceae;D_5__uncultured;D_6__hydrothermal vent metagenome	0	343	0	0	0	0	343	TRUE
D_0__Bacteria;D_1__Planctomycetes;D_2__Planctomycetacia;D_3__Pirellulales;D_4__Pirellulaceae;D_5__uncultured;D_6__uncultured marine microorganism	267	0	214	0	0	0	481	TRUE
D_0__Bacteria;D_1__Planctomycetes;D_2__Planctomycetacia;D_3__Pirellulales;D_4__Pirellulaceae;D_5__uncultured;__	127	813	478	0	0	0	1418	TRUE
D_0__Bacteria;D_1__Planctomycetes;D_2__Planctomycetacia;D_3__Pirellulales;D_4__Pirellulaceae;__;__	1778	2216	1946	47	55	0	6042	TRUE
D_0__Bacteria;D_1__Planctomycetes;D_2__Planctomycetacia;D_3__Planctomycetales;D_4__Gimesiaceae;D_5__uncultured;D_6__planctomycete DDSW1318	0	43	0	0	0	0	43	FALSE
D_0__Bacteria;D_1__Planctomycetes;D_2__Planctomycetacia;D_3__Planctomycetales;D_4__Gimesiaceae;D_5__uncultured;__	0	0	77	0	0	0	77	TRUE
D_0__Bacteria;D_1__Planctomycetes;D_2__Planctomycetacia;D_3__Planctomycetales;D_4__Rubinisphaeraceae;D_5__Rubinisphaera;__	29	31	120	0	0	0	180	TRUE
D_0__Bacteria;D_1__Planctomycetes;D_2__Planctomycetacia;D_3__Planctomycetales;D_4__Rubinisphaeraceae;__;__	0	25	34	0	0	0	59	TRUE
D_0__Bacteria;D_1__Planctomycetes;D_2__Planctomycetacia;D_3__Planctomycetales;D_4__uncultured;D_5__planctomycete DDD3G8;D_6__	19	9	19	0	0	0	47	FALSE
D_0__Bacteria;D_1__Planctomycetes;D_2__Planctomycetacia;D_3__Planctomycetales;__;__;__	0	56	229	0	4	0	289	TRUE
D_0__Bacteria;D_1__Planctomycetes;D_2__Planctomycetacia;__;__;__;__	82	115	530	2	0	10	739	TRUE
D_0__Bacteria;D_1__Planctomycetes;D_2__vadinHA49;D_3__Planctomycetes bacterium SM23_65;D_4__;D_5__;D_6__	0	0	0	7	0	0	7	FALSE
D_0__Bacteria;D_1__Planctomycetes;D_2__vadinHA49;D_3__bacterium UW 659-2-F09;D_4__;D_5__;D_6__	0	0	0	0	9	0	9	FALSE
D_0__Bacteria;D_1__Planctomycetes;__;__;__;__;__	33	0	32	60	78	152	355	TRUE
D_0__Bacteria;D_1__Poribacteria;D_2__uncultured Firmicutes bacterium;D_3__;D_4__;D_5__;D_6__	0	0	0	94	100	385	579	TRUE
D_0__Bacteria;D_1__Proteobacteria;D_2__Alphaproteobacteria;D_3__Acetobacterales;D_4__Acetobacteraceae;D_5__Roseomonas;__	0	0	0	0	0	6	6	FALSE
D_0__Bacteria;D_1__Proteobacteria;D_2__Alphaproteobacteria;D_3__Acetobacterales;D_4__Acetobacteraceae;__;__	0	3	0	82	68	48	201	TRUE
D_0__Bacteria;D_1__Proteobacteria;D_2__Alphaproteobacteria;D_3__Azospirillales;D_4__Azospirillaceae;D_5__Nitrospirillum;D_6__Azospirillum sp. EP3-3L	0	0	0	0	12	10	22	FALSE
D_0__Bacteria;D_1__Proteobacteria;D_2__Alphaproteobacteria;D_3__Azospirillales;D_4__Inquilinaceae;D_5__Inquilinus;D_6__metagenome	0	0	0	0	17	0	17	FALSE
D_0__Bacteria;D_1__Proteobacteria;D_2__Alphaproteobacteria;D_3__Caulobacterales;D_4__Caulobacteraceae;D_5__Brevundimonas;D_6__bacterium 8-gw2-4	0	0	0	0	19	0	19	FALSE
D_0__Bacteria;D_1__Proteobacteria;D_2__Alphaproteobacteria;D_3__Caulobacterales;D_4__Caulobacteraceae;D_5__Brevundimonas;__	0	0	0	34	185	72	291	TRUE
D_0__Bacteria;D_1__Proteobacteria;D_2__Alphaproteobacteria;D_3__Caulobacterales;D_4__Caulobacteraceae;D_5__Caulobacter;D_6__Caulobacter sp. M1T2B5	0	0	0	0	5	0	5	FALSE
D_0__Bacteria;D_1__Proteobacteria;D_2__Alphaproteobacteria;D_3__Caulobacterales;D_4__Caulobacteraceae;D_5__Caulobacter;__	0	0	0	0	0	6	6	FALSE
D_0__Bacteria;D_1__Proteobacteria;D_2__Alphaproteobacteria;D_3__Caulobacterales;D_4__Caulobacteraceae;D_5__PMMR1;D_6__uncultured Caulobacter sp.	0	0	0	0	0	17	17	FALSE
D_0__Bacteria;D_1__Proteobacteria;D_2__Alphaproteobacteria;D_3__Caulobacterales;D_4__Caulobacteraceae;D_5__Phenylobacterium;D_6__Phenylobacterium sp. NCCP-1287	0	0	0	33	19	35	87	TRUE
D_0__Bacteria;D_1__Proteobacteria;D_2__Alphaproteobacteria;D_3__Caulobacterales;D_4__Caulobacteraceae;D_5__Phenylobacterium;D_6__uncultured Phenylobacterium sp.	0	0	0	0	15	0	15	FALSE
D_0__Bacteria;D_1__Proteobacteria;D_2__Alphaproteobacteria;D_3__Caulobacterales;D_4__Caulobacteraceae;__;__	0	0	0	164	164	172	500	TRUE
D_0__Bacteria;D_1__Proteobacteria;D_2__Alphaproteobacteria;D_3__Caulobacterales;D_4__Hyphomonadaceae;D_5__Hirschia;D_6__uncultured Rhizobiaceae bacterium	0	0	0	0	8	0	8	FALSE
D_0__Bacteria;D_1__Proteobacteria;D_2__Alphaproteobacteria;D_3__Caulobacterales;D_4__Hyphomonadaceae;D_5__Hyphomonas;__	0	0	0	4	10	0	14	FALSE
D_0__Bacteria;D_1__Proteobacteria;D_2__Alphaproteobacteria;D_3__Caulobacterales;D_4__Hyphomonadaceae;__;__	0	0	49	0	0	0	49	FALSE
D_0__Bacteria;D_1__Proteobacteria;D_2__Alphaproteobacteria;D_3__Caulobacterales;D_4__Parvularculaceae;D_5__uncultured;D_6__Parvularcula sp. BBD 1991-13	88	0	0	0	0	0	88	TRUE
D_0__Bacteria;D_1__Proteobacteria;D_2__Alphaproteobacteria;D_3__Caulobacterales;D_4__Parvularculaceae;D_5__uncultured;D_6__uncultured Rhizobiales bacterium	0	26	0	0	0	0	26	FALSE
D_0__Bacteria;D_1__Proteobacteria;D_2__Alphaproteobacteria;D_3__Caulobacterales;D_4__Parvularculaceae;D_5__uncultured;__	0	23	0	0	0	0	23	FALSE
D_0__Bacteria;D_1__Proteobacteria;D_2__Alphaproteobacteria;D_3__Dongiales;D_4__Dongiaceae;D_5__Dongia;D_6__uncultured Rhodospirillaceae bacterium	0	0	0	0	15	0	15	FALSE
D_0__Bacteria;D_1__Proteobacteria;D_2__Alphaproteobacteria;D_3__Dongiales;D_4__Dongiaceae;D_5__Dongia;D_6__uncultured soil bacterium	0	0	0	0	5	4	9	FALSE
D_0__Bacteria;D_1__Proteobacteria;D_2__Alphaproteobacteria;D_3__Elsterales;D_4__uncultured;D_5__uncultured Hyphomicrobiaceae bacterium;D_6__	0	0	0	0	17	13	30	FALSE
D_0__Bacteria;D_1__Proteobacteria;D_2__Alphaproteobacteria;D_3__Elsterales;D_4__uncultured;D_5__uncultured soil bacterium;D_6__	0	0	0	29	34	29	92	TRUE
D_0__Bacteria;D_1__Proteobacteria;D_2__Alphaproteobacteria;D_3__Elsterales;D_4__uncultured;__;__	0	0	0	0	0	17	17	FALSE
D_0__Bacteria;D_1__Proteobacteria;D_2__Alphaproteobacteria;D_3__Micavibrionales;D_4__Micavibrionaceae;D_5__uncultured;D_6__metagenome	0	0	0	0	0	8	8	FALSE
D_0__Bacteria;D_1__Proteobacteria;D_2__Alphaproteobacteria;D_3__Micavibrionales;D_4__Micavibrionaceae;__;__	0	0	14	0	0	0	14	FALSE
D_0__Bacteria;D_1__Proteobacteria;D_2__Alphaproteobacteria;D_3__Micropepsales;D_4__Micropepsaceae;D_5__uncultured bacterium;D_6__	0	0	0	0	0	6	6	FALSE
D_0__Bacteria;D_1__Proteobacteria;D_2__Alphaproteobacteria;D_3__Micropepsales;D_4__Micropepsaceae;D_5__uncultured proteobacterium;D_6__	0	0	0	0	21	0	21	FALSE
D_0__Bacteria;D_1__Proteobacteria;D_2__Alphaproteobacteria;D_3__Micropepsales;D_4__Micropepsaceae;D_5__uncultured;D_6__bacterium enrichment culture clone auto2_4W	0	0	0	28	15	20	63	TRUE
D_0__Bacteria;D_1__Proteobacteria;D_2__Alphaproteobacteria;D_3__Micropepsales;D_4__Micropepsaceae;__;__	0	0	0	14	9	34	57	TRUE
D_0__Bacteria;D_1__Proteobacteria;D_2__Alphaproteobacteria;D_3__Paracaedibacterales;D_4__Paracaedibacteraceae;__;__	0	0	0	6	0	3	9	FALSE
D_0__Bacteria;D_1__Proteobacteria;D_2__Alphaproteobacteria;D_3__Puniceispirillales;D_4__SAR116 clade;__;__	0	0	0	5	0	0	5	FALSE
D_0__Bacteria;D_1__Proteobacteria;D_2__Alphaproteobacteria;D_3__Reyranellales;D_4__Reyranellaceae;D_5__Reyranella;D_6__metagenome	0	0	0	0	0	14	14	FALSE
D_0__Bacteria;D_1__Proteobacteria;D_2__Alphaproteobacteria;D_3__Reyranellales;D_4__Reyranellaceae;D_5__Reyranella;D_6__uncultured Bradyrhizobiaceae bacterium	0	0	0	15	17	0	32	FALSE
D_0__Bacteria;D_1__Proteobacteria;D_2__Alphaproteobacteria;D_3__Reyranellales;D_4__Reyranellaceae;D_5__Reyranella;D_6__uncultured alpha proteobacterium	0	0	0	0	0	3	3	FALSE
D_0__Bacteria;D_1__Proteobacteria;D_2__Alphaproteobacteria;D_3__Rhizobiales;D_4__A0839;D_5__uncultured proteobacterium;D_6__	0	0	0	7	13	6	26	FALSE
D_0__Bacteria;D_1__Proteobacteria;D_2__Alphaproteobacteria;D_3__Rhizobiales;D_4__A0839;__;__	0	6	0	0	0	0	6	FALSE
D_0__Bacteria;D_1__Proteobacteria;D_2__Alphaproteobacteria;D_3__Rhizobiales;D_4__Beijerinckiaceae;D_5__Methylobacterium;__	0	0	0	17	316	1832	2165	TRUE
D_0__Bacteria;D_1__Proteobacteria;D_2__Alphaproteobacteria;D_3__Rhizobiales;D_4__Beijerinckiaceae;D_5__Methylocystis;D_6__Methylocystis sp.	0	0	0	0	0	2	2	FALSE
D_0__Bacteria;D_1__Proteobacteria;D_2__Alphaproteobacteria;D_3__Rhizobiales;D_4__Beijerinckiaceae;D_5__Microvirga;__	0	0	0	11	0	0	11	FALSE
D_0__Bacteria;D_1__Proteobacteria;D_2__Alphaproteobacteria;D_3__Rhizobiales;D_4__Devosiaceae;D_5__Devosia;__	0	0	0	0	6	0	6	FALSE
D_0__Bacteria;D_1__Proteobacteria;D_2__Alphaproteobacteria;D_3__Rhizobiales;D_4__Hyphomicrobiaceae;D_5__Hyphomicrobium;D_6__unidentified	0	0	0	8	16	25	49	FALSE
D_0__Bacteria;D_1__Proteobacteria;D_2__Alphaproteobacteria;D_3__Rhizobiales;D_4__Hyphomicrobiaceae;D_5__Hyphomicrobium;__	0	0	0	25	28	40	93	TRUE
D_0__Bacteria;D_1__Proteobacteria;D_2__Alphaproteobacteria;D_3__Rhizobiales;D_4__KF-JG30-B3;D_5__uncultured organism;D_6__	0	0	0	20	16	0	36	FALSE
D_0__Bacteria;D_1__Proteobacteria;D_2__Alphaproteobacteria;D_3__Rhizobiales;D_4__Rhizobiaceae;D_5__Allorhizobium-Neorhizobium-Pararhizobium-Rhizobium;__	0	0	0	0	13	26	39	FALSE
D_0__Bacteria;D_1__Proteobacteria;D_2__Alphaproteobacteria;D_3__Rhizobiales;D_4__Rhizobiaceae;D_5__Aminobacter;D_6__Nitratireductor sp. WW12(2011)	0	0	0	0	8	0	8	FALSE
D_0__Bacteria;D_1__Proteobacteria;D_2__Alphaproteobacteria;D_3__Rhizobiales;D_4__Rhizobiaceae;D_5__Mesorhizobium;__	0	0	0	0	11	0	11	FALSE
D_0__Bacteria;D_1__Proteobacteria;D_2__Alphaproteobacteria;D_3__Rhizobiales;D_4__Rhizobiaceae;D_5__Oricola;D_6__Mesorhizobium sp. KYW12	0	36	0	0	0	0	36	FALSE
D_0__Bacteria;D_1__Proteobacteria;D_2__Alphaproteobacteria;D_3__Rhizobiales;D_4__Rhizobiaceae;__;__	0	66	0	0	46	67	179	TRUE
D_0__Bacteria;D_1__Proteobacteria;D_2__Alphaproteobacteria;D_3__Rhizobiales;D_4__Rhizobiales Incertae Sedis;D_5__Anderseniella;__	0	0	0	11	16	0	27	FALSE
D_0__Bacteria;D_1__Proteobacteria;D_2__Alphaproteobacteria;D_3__Rhizobiales;D_4__Rhizobiales Incertae Sedis;D_5__Bauldia;__	0	211	0	0	0	7	218	TRUE
D_0__Bacteria;D_1__Proteobacteria;D_2__Alphaproteobacteria;D_3__Rhizobiales;D_4__Rhodobiaceae;D_5__Tepidamorphus;D_6__Lutibaculum sp.	0	0	0	17	0	0	17	FALSE
D_0__Bacteria;D_1__Proteobacteria;D_2__Alphaproteobacteria;D_3__Rhizobiales;D_4__Rhodomicrobiaceae;D_5__Rhodomicrobium;__	0	0	0	11	0	13	24	FALSE
D_0__Bacteria;D_1__Proteobacteria;D_2__Alphaproteobacteria;D_3__Rhizobiales;D_4__Stappiaceae;D_5__uncultured;D_6__uncultured bacterium	1744	2378	1781	0	0	0	5903	TRUE
D_0__Bacteria;D_1__Proteobacteria;D_2__Alphaproteobacteria;D_3__Rhizobiales;D_4__Stappiaceae;__;__	0	0	0	0	0	31	31	FALSE
D_0__Bacteria;D_1__Proteobacteria;D_2__Alphaproteobacteria;D_3__Rhizobiales;D_4__Xanthobacteraceae;D_5__Pseudolabrys;__	0	0	0	43	37	30	110	TRUE
D_0__Bacteria;D_1__Proteobacteria;D_2__Alphaproteobacteria;D_3__Rhizobiales;D_4__Xanthobacteraceae;D_5__Rhodoplanes;D_6__uncultured Rhizobiales bacterium	0	0	0	14	0	22	36	FALSE
D_0__Bacteria;D_1__Proteobacteria;D_2__Alphaproteobacteria;D_3__Rhizobiales;D_4__Xanthobacteraceae;D_5__Rhodoplanes;__	0	0	0	15	0	20	35	FALSE
D_0__Bacteria;D_1__Proteobacteria;D_2__Alphaproteobacteria;D_3__Rhizobiales;D_4__Xanthobacteraceae;D_5__uncultured;D_6__Rhodoplanes sp. enrichment culture clone ANA-RAS-62	0	0	0	25	42	38	105	TRUE
D_0__Bacteria;D_1__Proteobacteria;D_2__Alphaproteobacteria;D_3__Rhizobiales;D_4__Xanthobacteraceae;__;__	384	567	528	101	156	104	1840	TRUE
D_0__Bacteria;D_1__Proteobacteria;D_2__Alphaproteobacteria;D_3__Rhizobiales;D_4__uncultured;D_5__uncultured Hyphomicrobiaceae bacterium;D_6__	0	0	0	7	0	0	7	FALSE
D_0__Bacteria;D_1__Proteobacteria;D_2__Alphaproteobacteria;D_3__Rhizobiales;__;__;__	371	2351	1869	54	91	78	4814	TRUE
D_0__Bacteria;D_1__Proteobacteria;D_2__Alphaproteobacteria;D_3__Rhodobacterales;D_4__Rhodobacteraceae;D_5__Paracoccus;__	0	0	0	0	44	67	111	TRUE
D_0__Bacteria;D_1__Proteobacteria;D_2__Alphaproteobacteria;D_3__Rhodobacterales;D_4__Rhodobacteraceae;__;__	378	975	1201	329	354	110	3347	TRUE
D_0__Bacteria;D_1__Proteobacteria;D_2__Alphaproteobacteria;D_3__Rhodospirillales;D_4__AEGEAN-169 marine group;D_5__marine metagenome;D_6__	0	0	0	0	2	0	2	FALSE
D_0__Bacteria;D_1__Proteobacteria;D_2__Alphaproteobacteria;D_3__Rhodospirillales;D_4__Magnetospirillaceae;D_5__Magnetospirillum;__	0	0	0	3	4	0	7	FALSE
D_0__Bacteria;D_1__Proteobacteria;D_2__Alphaproteobacteria;D_3__Rhodospirillales;D_4__Magnetospirillaceae;D_5__Telmatospirillum;__	0	0	0	27	6	0	33	FALSE
D_0__Bacteria;D_1__Proteobacteria;D_2__Alphaproteobacteria;D_3__Rhodospirillales;D_4__Magnetospirillaceae;__;__	0	0	0	112	133	117	362	TRUE
D_0__Bacteria;D_1__Proteobacteria;D_2__Alphaproteobacteria;D_3__Rhodospirillales;D_4__Rhodopirillaceae;D_5__Defluviicoccus;D_6__uncultured bacterium mle1-13	0	87	0	0	0	0	87	TRUE
D_0__Bacteria;D_1__Proteobacteria;D_2__Alphaproteobacteria;D_3__Rhodospirillales;D_4__Rhodopirillaceae;D_5__Defluviicoccus;__	0	0	0	0	4	0	4	FALSE
D_0__Bacteria;D_1__Proteobacteria;D_2__Alphaproteobacteria;D_3__Rhodovibrionales;D_4__Kiloniellaceae;D_5__Pelagibius;D_6__Rhodospirillaceae bacterium PS4B-B496	0	7	0	0	0	0	7	FALSE
D_0__Bacteria;D_1__Proteobacteria;D_2__Alphaproteobacteria;D_3__Rhodovibrionales;D_4__Kiloniellaceae;__;__	0	0	0	0	20	0	20	FALSE
D_0__Bacteria;D_1__Proteobacteria;D_2__Alphaproteobacteria;D_3__Rhodovibrionales;__;__;__	0	32	0	0	0	0	32	FALSE
D_0__Bacteria;D_1__Proteobacteria;D_2__Alphaproteobacteria;D_3__Rickettsiales;D_4__AB1;D_5__uncultured proteobacterium;D_6__	9	0	0	0	0	0	9	FALSE
D_0__Bacteria;D_1__Proteobacteria;D_2__Alphaproteobacteria;D_3__Rickettsiales;D_4__Midichloriaceae;D_5__MD3-55;D_6__bacterium Sq1_host	0	0	0	0	2	0	2	FALSE
D_0__Bacteria;D_1__Proteobacteria;D_2__Alphaproteobacteria;D_3__Rickettsiales;D_4__Mitochondria;D_5__Picochlorum sp. SENEW3;D_6__	0	0	2	0	0	0	2	FALSE
D_0__Bacteria;D_1__Proteobacteria;D_2__Alphaproteobacteria;D_3__Rickettsiales;D_4__Mitochondria;D_5__Pseudogymnoascus sp. VKM F-3775;D_6__	0	0	0	0	0	3	3	FALSE
D_0__Bacteria;D_1__Proteobacteria;D_2__Alphaproteobacteria;D_3__Rickettsiales;D_4__Mitochondria;__;__	0	0	0	4	96	3	103	TRUE
D_0__Bacteria;D_1__Proteobacteria;D_2__Alphaproteobacteria;D_3__SAR11 clade;D_4__Clade I;D_5__Clade Ia;D_6__uncultured Bacteroidetes bacterium	0	0	0	0	3	0	3	FALSE
D_0__Bacteria;D_1__Proteobacteria;D_2__Alphaproteobacteria;D_3__Sphingomonadales;D_4__Sphingomonadaceae;D_5__Altererythrobacter;__	0	0	0	0	10	0	10	FALSE
D_0__Bacteria;D_1__Proteobacteria;D_2__Alphaproteobacteria;D_3__Sphingomonadales;D_4__Sphingomonadaceae;D_5__Erythrobacter;D_6__Erythrobacter jejuensis	0	221	0	0	0	0	221	TRUE
D_0__Bacteria;D_1__Proteobacteria;D_2__Alphaproteobacteria;D_3__Sphingomonadales;D_4__Sphingomonadaceae;D_5__Erythrobacter;D_6__Erythrobacter sp. RKEM 642	0	0	0	0	12	0	12	FALSE
D_0__Bacteria;D_1__Proteobacteria;D_2__Alphaproteobacteria;D_3__Sphingomonadales;D_4__Sphingomonadaceae;D_5__Erythrobacter;__	0	0	0	16	21	0	37	FALSE
D_0__Bacteria;D_1__Proteobacteria;D_2__Alphaproteobacteria;D_3__Sphingomonadales;D_4__Sphingomonadaceae;D_5__Novosphingobium;D_6__Sphingomonas sp. EC-K085	0	0	0	0	27	0	27	FALSE
D_0__Bacteria;D_1__Proteobacteria;D_2__Alphaproteobacteria;D_3__Sphingomonadales;D_4__Sphingomonadaceae;D_5__Novosphingobium;__	0	0	0	15	0	25	40	FALSE
D_0__Bacteria;D_1__Proteobacteria;D_2__Alphaproteobacteria;D_3__Sphingomonadales;D_4__Sphingomonadaceae;D_5__Sphingobium;__	0	0	0	0	8	0	8	FALSE
D_0__Bacteria;D_1__Proteobacteria;D_2__Alphaproteobacteria;D_3__Sphingomonadales;D_4__Sphingomonadaceae;D_5__Sphingomonas;__	0	0	0	6	68	42	116	TRUE
D_0__Bacteria;D_1__Proteobacteria;D_2__Alphaproteobacteria;D_3__Sphingomonadales;D_4__Sphingomonadaceae;D_5__Sphingorhabdus;D_6__Blastomonas natatoria	0	0	0	0	0	6	6	FALSE
D_0__Bacteria;D_1__Proteobacteria;D_2__Alphaproteobacteria;D_3__Sphingomonadales;D_4__Sphingomonadaceae;__;__	212	0	61	5	14	13	305	TRUE
D_0__Bacteria;D_1__Proteobacteria;D_2__Alphaproteobacteria;D_3__Thalassobaculales;D_4__uncultured;D_5__uncultured Rhodospirillaceae bacterium;D_6__	0	0	0	24	0	0	24	FALSE
D_0__Bacteria;D_1__Proteobacteria;D_2__Alphaproteobacteria;D_3__Tistrellales;D_4__Geminicoccaceae;D_5__Candidatus Alysiosphaera;__	0	23	0	0	0	0	23	FALSE
D_0__Bacteria;D_1__Proteobacteria;D_2__Alphaproteobacteria;D_3__Tistrellales;D_4__Geminicoccaceae;__;__	0	0	446	0	0	0	446	TRUE
D_0__Bacteria;D_1__Proteobacteria;D_2__Alphaproteobacteria;D_3__uncultured;D_4__uncultured Rhodobacteraceae bacterium;D_5__;D_6__	0	44	0	0	0	0	44	FALSE
D_0__Bacteria;D_1__Proteobacteria;D_2__Alphaproteobacteria;__;__;__;__	1218	1743	1779	155	312	159	5366	TRUE
D_0__Bacteria;D_1__Proteobacteria;D_2__Deltaproteobacteria;D_3__10bav-F6;D_4__uncultured delta proteobacterium;D_5__;D_6__	0	0	0	0	16	7	23	FALSE
D_0__Bacteria;D_1__Proteobacteria;D_2__Deltaproteobacteria;D_3__Apal-E12;D_4__uncultured bacterium;D_5__;D_6__	0	0	5	0	0	0	5	FALSE
D_0__Bacteria;D_1__Proteobacteria;D_2__Deltaproteobacteria;D_3__Bdellovibrionales;D_4__Bacteriovoracaceae;D_5__Halobacteriovorax;D_6__uncultured delta proteobacterium	0	0	0	69	0	5	74	TRUE
D_0__Bacteria;D_1__Proteobacteria;D_2__Deltaproteobacteria;D_3__Bdellovibrionales;D_4__Bacteriovoracaceae;D_5__Halobacteriovorax;__	0	0	0	46	0	0	46	FALSE
D_0__Bacteria;D_1__Proteobacteria;D_2__Deltaproteobacteria;D_3__Bdellovibrionales;D_4__Bacteriovoracaceae;D_5__Peredibacter;__	0	0	0	0	0	9	9	FALSE
D_0__Bacteria;D_1__Proteobacteria;D_2__Deltaproteobacteria;D_3__Bdellovibrionales;D_4__Bacteriovoracaceae;__;__	16	0	0	0	18	0	34	FALSE
D_0__Bacteria;D_1__Proteobacteria;D_2__Deltaproteobacteria;D_3__Bdellovibrionales;D_4__Bdellovibrionaceae;D_5__Bdellovibrio;D_6__uncultured marine bacterium	0	5	0	0	0	0	5	FALSE
D_0__Bacteria;D_1__Proteobacteria;D_2__Deltaproteobacteria;D_3__Bdellovibrionales;D_4__Bdellovibrionaceae;D_5__Bdellovibrio;__	0	2	0	0	0	0	2	FALSE
D_0__Bacteria;D_1__Proteobacteria;D_2__Deltaproteobacteria;D_3__Bradymonadales;D_4__Bradymonadaceae;__;__	7	0	25	0	0	0	32	FALSE
D_0__Bacteria;D_1__Proteobacteria;D_2__Deltaproteobacteria;D_3__DTB120;D_4__Deltaproteobacteria bacterium RBG_19FT_COMBO_58_16;D_5__;D_6__	0	0	0	169	135	173	477	TRUE
D_0__Bacteria;D_1__Proteobacteria;D_2__Deltaproteobacteria;D_3__DTB120;__;__;__	0	0	0	171	156	148	475	TRUE
D_0__Bacteria;D_1__Proteobacteria;D_2__Deltaproteobacteria;D_3__Deltaproteobacteria Incertae Sedis;D_4__Syntrophorhabdaceae;D_5__Syntrophorhabdus;D_6__uncultured Syntrophorhabdaceae bacterium	0	0	0	184	98	199	481	TRUE
D_0__Bacteria;D_1__Proteobacteria;D_2__Deltaproteobacteria;D_3__Deltaproteobacteria Incertae Sedis;D_4__Syntrophorhabdaceae;D_5__Syntrophorhabdus;D_6__uncultured Syntrophorhabdaceae bacterium WCHB1-27	0	0	0	108	95	114	317	TRUE
D_0__Bacteria;D_1__Proteobacteria;D_2__Deltaproteobacteria;D_3__Deltaproteobacteria Incertae Sedis;D_4__Syntrophorhabdaceae;D_5__Syntrophorhabdus;__	0	0	0	91	90	118	299	TRUE
D_0__Bacteria;D_1__Proteobacteria;D_2__Deltaproteobacteria;D_3__Desulfarculales;D_4__Desulfarculaceae;D_5__Desulfatiglans;D_6__bacterium enrichment culture clone BznS295	0	0	0	0	0	19	19	FALSE
D_0__Bacteria;D_1__Proteobacteria;D_2__Deltaproteobacteria;D_3__Desulfarculales;D_4__Desulfarculaceae;D_5__Desulfatiglans;D_6__marine metagenome	0	0	0	17	15	47	79	TRUE
D_0__Bacteria;D_1__Proteobacteria;D_2__Deltaproteobacteria;D_3__Desulfarculales;D_4__Desulfarculaceae;D_5__Desulfatiglans;D_6__uncultured hydrocarbon seep bacterium GCA017	0	0	0	82	43	81	206	TRUE
D_0__Bacteria;D_1__Proteobacteria;D_2__Deltaproteobacteria;D_3__Desulfarculales;D_4__Desulfarculaceae;D_5__Desulfatiglans;D_6__uncultured marine bacterium	0	0	0	801	648	1061	2510	TRUE
D_0__Bacteria;D_1__Proteobacteria;D_2__Deltaproteobacteria;D_3__Desulfarculales;D_4__Desulfarculaceae;D_5__Desulfatiglans;D_6__uncultured sediment bacterium	0	0	0	61	14	63	138	TRUE
D_0__Bacteria;D_1__Proteobacteria;D_2__Deltaproteobacteria;D_3__Desulfarculales;D_4__Desulfarculaceae;D_5__Desulfatiglans;__	832	0	622	435	316	202	2407	TRUE
D_0__Bacteria;D_1__Proteobacteria;D_2__Deltaproteobacteria;D_3__Desulfarculales;D_4__Desulfarculaceae;D_5__uncultured;D_6__Desulfarculaceae bacterium JdFR-97	0	0	0	72	66	88	226	TRUE
D_0__Bacteria;D_1__Proteobacteria;D_2__Deltaproteobacteria;D_3__Desulfobacterales;D_4__Desulfobacteraceae;D_5__Desulfatiferula;D_6__uncultured delta proteobacterium	0	0	0	0	15	0	15	FALSE
D_0__Bacteria;D_1__Proteobacteria;D_2__Deltaproteobacteria;D_3__Desulfobacterales;D_4__Desulfobacteraceae;D_5__Desulfatitalea;D_6__uncultured Desulfobacteraceae bacterium	0	0	0	30	36	0	66	TRUE
D_0__Bacteria;D_1__Proteobacteria;D_2__Deltaproteobacteria;D_3__Desulfobacterales;D_4__Desulfobacteraceae;D_5__Desulfatitalea;D_6__uncultured delta proteobacterium	0	0	0	0	0	34	34	FALSE
D_0__Bacteria;D_1__Proteobacteria;D_2__Deltaproteobacteria;D_3__Desulfobacterales;D_4__Desulfobacteraceae;D_5__Desulfatitalea;__	407	0	0	0	0	0	407	TRUE
D_0__Bacteria;D_1__Proteobacteria;D_2__Deltaproteobacteria;D_3__Desulfobacterales;D_4__Desulfobacteraceae;D_5__Desulfobacter;D_6__delta proteobacterium r18	0	0	0	9	0	0	9	FALSE
D_0__Bacteria;D_1__Proteobacteria;D_2__Deltaproteobacteria;D_3__Desulfobacterales;D_4__Desulfobacteraceae;D_5__Desulfobacterium;D_6__uncultured Desulfobacteraceae bacterium	0	0	0	0	51	0	51	TRUE
D_0__Bacteria;D_1__Proteobacteria;D_2__Deltaproteobacteria;D_3__Desulfobacterales;D_4__Desulfobacteraceae;D_5__Desulfococcus;D_6__uncultured Desulfococcus sp.	0	0	0	15	0	0	15	FALSE
D_0__Bacteria;D_1__Proteobacteria;D_2__Deltaproteobacteria;D_3__Desulfobacterales;D_4__Desulfobacteraceae;D_5__Desulfosarcina;D_6__Desulfosarcina cetonica JCM 12296	0	0	0	69	143	28	240	TRUE
D_0__Bacteria;D_1__Proteobacteria;D_2__Deltaproteobacteria;D_3__Desulfobacterales;D_4__Desulfobacteraceae;D_5__Desulfosarcina;__	0	0	0	32	91	0	123	TRUE
D_0__Bacteria;D_1__Proteobacteria;D_2__Deltaproteobacteria;D_3__Desulfobacterales;D_4__Desulfobacteraceae;D_5__SEEP-SRB1;D_6__Desulfobacterales bacterium S7086C20	0	0	0	26	35	27	88	TRUE
D_0__Bacteria;D_1__Proteobacteria;D_2__Deltaproteobacteria;D_3__Desulfobacterales;D_4__Desulfobacteraceae;D_5__SEEP-SRB1;D_6__uncultured proteobacterium	0	0	0	130	208	101	439	TRUE
D_0__Bacteria;D_1__Proteobacteria;D_2__Deltaproteobacteria;D_3__Desulfobacterales;D_4__Desulfobacteraceae;D_5__SEEP-SRB1;D_6__uncultured sulfate-reducing bacterium	0	0	0	44	48	0	92	TRUE
D_0__Bacteria;D_1__Proteobacteria;D_2__Deltaproteobacteria;D_3__Desulfobacterales;D_4__Desulfobacteraceae;D_5__SEEP-SRB1;__	0	0	0	35	65	0	100	TRUE
D_0__Bacteria;D_1__Proteobacteria;D_2__Deltaproteobacteria;D_3__Desulfobacterales;D_4__Desulfobacteraceae;D_5__Sva0081 sediment group;D_6__metagenome	0	564	0	310	509	144	1527	TRUE
D_0__Bacteria;D_1__Proteobacteria;D_2__Deltaproteobacteria;D_3__Desulfobacterales;D_4__Desulfobacteraceae;D_5__Sva0081 sediment group;D_6__uncultured marine bacterium	0	0	0	429	344	361	1134	TRUE
D_0__Bacteria;D_1__Proteobacteria;D_2__Deltaproteobacteria;D_3__Desulfobacterales;D_4__Desulfobacteraceae;D_5__Sva0081 sediment group;__	0	0	0	358	500	307	1165	TRUE
D_0__Bacteria;D_1__Proteobacteria;D_2__Deltaproteobacteria;D_3__Desulfobacterales;D_4__Desulfobacteraceae;D_5__uncultured;__	0	0	0	0	55	0	55	TRUE
D_0__Bacteria;D_1__Proteobacteria;D_2__Deltaproteobacteria;D_3__Desulfobacterales;D_4__Desulfobacteraceae;__;__	1994	2910	2072	1712	2288	1372	12348	TRUE
D_0__Bacteria;D_1__Proteobacteria;D_2__Deltaproteobacteria;D_3__Desulfobacterales;D_4__Desulfobulbaceae;D_5__Desulfobulbus;D_6__uncultured Desulfobacterales bacterium	0	0	0	0	9	0	9	FALSE
D_0__Bacteria;D_1__Proteobacteria;D_2__Deltaproteobacteria;D_3__Desulfobacterales;D_4__Desulfobulbaceae;D_5__Desulfobulbus;__	0	0	344	22	94	15	475	TRUE
D_0__Bacteria;D_1__Proteobacteria;D_2__Deltaproteobacteria;D_3__Desulfobacterales;D_4__Desulfobulbaceae;D_5__Desulfopila;__	0	0	0	0	16	0	16	FALSE
D_0__Bacteria;D_1__Proteobacteria;D_2__Deltaproteobacteria;D_3__Desulfobacterales;D_4__Desulfobulbaceae;D_5__Desulfotalea sp. NA22;D_6__	0	0	0	24	32	0	56	TRUE
D_0__Bacteria;D_1__Proteobacteria;D_2__Deltaproteobacteria;D_3__Desulfobacterales;D_4__Desulfobulbaceae;D_5__Desulfurivibrio;__	0	0	0	10	16	0	26	FALSE
D_0__Bacteria;D_1__Proteobacteria;D_2__Deltaproteobacteria;D_3__Desulfobacterales;D_4__Desulfobulbaceae;D_5__Dissulfurirhabdus;__	0	0	0	12	0	0	12	FALSE
D_0__Bacteria;D_1__Proteobacteria;D_2__Deltaproteobacteria;D_3__Desulfobacterales;D_4__Desulfobulbaceae;D_5__MSBL7;D_6__bioreactor metagenome	0	0	0	0	13	0	13	FALSE
D_0__Bacteria;D_1__Proteobacteria;D_2__Deltaproteobacteria;D_3__Desulfobacterales;D_4__Desulfobulbaceae;D_5__[Desulfobacterium] catecholicum group;D_6__uncultured Desulfobulbaceae bacterium	0	0	0	0	9	0	9	FALSE
D_0__Bacteria;D_1__Proteobacteria;D_2__Deltaproteobacteria;D_3__Desulfobacterales;D_4__Desulfobulbaceae;D_5__uncultured;__	0	0	0	57	96	34	187	TRUE
D_0__Bacteria;D_1__Proteobacteria;D_2__Deltaproteobacteria;D_3__Desulfobacterales;D_4__Desulfobulbaceae;__;__	0	1246	648	82	243	14	2233	TRUE
D_0__Bacteria;D_1__Proteobacteria;D_2__Deltaproteobacteria;D_3__Desulfobacterales;__;__;__	0	0	215	93	183	95	586	TRUE
D_0__Bacteria;D_1__Proteobacteria;D_2__Deltaproteobacteria;D_3__Desulfovibrionales;D_4__Desulfovibrionaceae;D_5__Bilophila;D_6__gut metagenome	0	0	0	0	14	12	26	FALSE
D_0__Bacteria;D_1__Proteobacteria;D_2__Deltaproteobacteria;D_3__Desulfovibrionales;D_4__Desulfovibrionaceae;D_5__Bilophila;D_6__uncultured bacterium	0	0	0	5	5	35	45	FALSE
D_0__Bacteria;D_1__Proteobacteria;D_2__Deltaproteobacteria;D_3__Desulfovibrionales;D_4__Desulfovibrionaceae;D_5__Desulfovibrio;__	2	0	0	0	21	13	36	FALSE
D_0__Bacteria;D_1__Proteobacteria;D_2__Deltaproteobacteria;D_3__Desulfovibrionales;D_4__Desulfovibrionaceae;__;__	0	0	0	0	6	0	6	FALSE
D_0__Bacteria;D_1__Proteobacteria;D_2__Deltaproteobacteria;D_3__Desulfuromonadales;D_4__Desulfuromonadaceae;D_5__Desulfuromonas;__	0	0	0	28	63	0	91	TRUE
D_0__Bacteria;D_1__Proteobacteria;D_2__Deltaproteobacteria;D_3__Desulfuromonadales;D_4__Desulfuromonadaceae;D_5__Pelobacter;D_6__Pelobacter acetylenicus	0	0	0	31	13	13	57	TRUE
D_0__Bacteria;D_1__Proteobacteria;D_2__Deltaproteobacteria;D_3__Desulfuromonadales;D_4__Desulfuromonadaceae;D_5__Pelobacter;__	0	0	0	82	63	63	208	TRUE
D_0__Bacteria;D_1__Proteobacteria;D_2__Deltaproteobacteria;D_3__Desulfuromonadales;D_4__Desulfuromonadaceae;__;__	0	0	97	0	102	0	199	TRUE
D_0__Bacteria;D_1__Proteobacteria;D_2__Deltaproteobacteria;D_3__Desulfuromonadales;D_4__Geobacteraceae;D_5__Geobacter;__	0	0	0	549	589	547	1685	TRUE
D_0__Bacteria;D_1__Proteobacteria;D_2__Deltaproteobacteria;D_3__Desulfuromonadales;D_4__Geobacteraceae;D_5__Geothermobacter;D_6__unidentified marine bacterioplankton	0	0	0	0	19	0	19	FALSE
D_0__Bacteria;D_1__Proteobacteria;D_2__Deltaproteobacteria;D_3__Desulfuromonadales;D_4__Geobacteraceae;__;__	0	0	0	62	35	0	97	TRUE
D_0__Bacteria;D_1__Proteobacteria;D_2__Deltaproteobacteria;D_3__Desulfuromonadales;D_4__Sva1033;D_5__uncultured Desulfuromonadales bacterium;D_6__	0	0	0	72	219	26	317	TRUE
D_0__Bacteria;D_1__Proteobacteria;D_2__Deltaproteobacteria;D_3__Desulfuromonadales;__;__;__	0	59	0	184	327	193	763	TRUE
D_0__Bacteria;D_1__Proteobacteria;D_2__Deltaproteobacteria;D_3__MBNT15;D_4__Deltaproteobacteria bacterium CSP1-8;D_5__;D_6__	0	0	0	34	11	39	84	TRUE
D_0__Bacteria;D_1__Proteobacteria;D_2__Deltaproteobacteria;D_3__MBNT15;D_4__delta proteobacterium enrichment culture clone AP-FeEnrich11;D_5__;D_6__	0	0	0	0	42	0	42	FALSE
D_0__Bacteria;D_1__Proteobacteria;D_2__Deltaproteobacteria;D_3__MBNT15;D_4__uncultured Geobacter sp.;D_5__;D_6__	0	0	0	11	8	6	25	FALSE
D_0__Bacteria;D_1__Proteobacteria;D_2__Deltaproteobacteria;D_3__MBNT15;D_4__uncultured Sorangiineae bacterium;D_5__;D_6__	0	0	93	0	0	0	93	TRUE
D_0__Bacteria;D_1__Proteobacteria;D_2__Deltaproteobacteria;D_3__MBNT15;__;__;__	0	196	309	23	39	0	567	TRUE
D_0__Bacteria;D_1__Proteobacteria;D_2__Deltaproteobacteria;D_3__Myxococcales;D_4__Archangiaceae;D_5__Anaeromyxobacter;D_6__Anaeromyxobacter sp. Fw109-5	0	0	0	28	9	6	43	FALSE
D_0__Bacteria;D_1__Proteobacteria;D_2__Deltaproteobacteria;D_3__Myxococcales;D_4__Archangiaceae;D_5__Anaeromyxobacter;D_6__uncultured Green Bay ferromanganous micronodule bacterium MNF2	0	0	0	21	35	16	72	TRUE
D_0__Bacteria;D_1__Proteobacteria;D_2__Deltaproteobacteria;D_3__Myxococcales;D_4__BIrii41;D_5__uncultured soil bacterium;D_6__	0	0	0	7	0	0	7	FALSE
D_0__Bacteria;D_1__Proteobacteria;D_2__Deltaproteobacteria;D_3__Myxococcales;D_4__Eel-36e1D6;D_5__uncultured organism;D_6__	0	0	0	0	11	0	11	FALSE
D_0__Bacteria;D_1__Proteobacteria;D_2__Deltaproteobacteria;D_3__Myxococcales;D_4__Haliangiaceae;D_5__Haliangium;D_6__Betaproteobacteria bacterium RIFCSPLOWO2_12_FULL_64_23	0	0	0	0	12	0	12	FALSE
D_0__Bacteria;D_1__Proteobacteria;D_2__Deltaproteobacteria;D_3__Myxococcales;D_4__Haliangiaceae;D_5__Haliangium;D_6__Haliangium tepidum	9	0	35	0	0	0	44	FALSE
D_0__Bacteria;D_1__Proteobacteria;D_2__Deltaproteobacteria;D_3__Myxococcales;D_4__Haliangiaceae;D_5__Haliangium;D_6__Myxococcales bacterium LWH177	0	0	88	0	0	0	88	TRUE
D_0__Bacteria;D_1__Proteobacteria;D_2__Deltaproteobacteria;D_3__Myxococcales;D_4__Haliangiaceae;D_5__Haliangium;__	0	0	0	13	0	6	19	FALSE
D_0__Bacteria;D_1__Proteobacteria;D_2__Deltaproteobacteria;D_3__Myxococcales;D_4__MSB-4B10;D_5__uncultured delta proteobacterium;D_6__	0	46	65	0	0	45	156	TRUE
D_0__Bacteria;D_1__Proteobacteria;D_2__Deltaproteobacteria;D_3__Myxococcales;D_4__Nannocystaceae;D_5__uncultured;D_6__metagenome	0	0	0	0	5	0	5	FALSE
D_0__Bacteria;D_1__Proteobacteria;D_2__Deltaproteobacteria;D_3__Myxococcales;D_4__Nannocystaceae;__;__	0	6	0	23	14	0	43	FALSE
D_0__Bacteria;D_1__Proteobacteria;D_2__Deltaproteobacteria;D_3__Myxococcales;D_4__P3OB-42;D_5__Deltaproteobacteria bacterium RIFOXYB12_FULL_58_9;D_6__	0	0	0	0	0	21	21	FALSE
D_0__Bacteria;D_1__Proteobacteria;D_2__Deltaproteobacteria;D_3__Myxococcales;D_4__Polyangiaceae;D_5__Pajaroellobacter;D_6__soil metagenome	0	0	0	14	0	0	14	FALSE
D_0__Bacteria;D_1__Proteobacteria;D_2__Deltaproteobacteria;D_3__Myxococcales;D_4__Polyangiaceae;D_5__Pajaroellobacter;D_6__uncultured proteobacterium	0	0	0	36	30	32	98	TRUE
D_0__Bacteria;D_1__Proteobacteria;D_2__Deltaproteobacteria;D_3__Myxococcales;D_4__Polyangiaceae;D_5__Sorangium;D_6__uncultured Sorangiineae bacterium	0	0	0	8	0	0	8	FALSE
D_0__Bacteria;D_1__Proteobacteria;D_2__Deltaproteobacteria;D_3__Myxococcales;D_4__Polyangiaceae;__;__	0	0	0	12	0	0	12	FALSE
D_0__Bacteria;D_1__Proteobacteria;D_2__Deltaproteobacteria;D_3__Myxococcales;D_4__Sandaracinaceae;D_5__uncultured;__	353	1393	648	20	50	17	2481	TRUE
D_0__Bacteria;D_1__Proteobacteria;D_2__Deltaproteobacteria;D_3__Myxococcales;D_4__VHS-B3-70;D_5__uncultured Geobacter sp.;D_6__	0	16	0	43	16	29	104	TRUE
D_0__Bacteria;D_1__Proteobacteria;D_2__Deltaproteobacteria;D_3__Myxococcales;D_4__VHS-B3-70;__;__	0	0	0	4	0	0	4	FALSE
D_0__Bacteria;D_1__Proteobacteria;D_2__Deltaproteobacteria;D_3__Myxococcales;D_4__VHS-B4-70;D_5__uncultured organism;D_6__	0	0	0	0	0	10	10	FALSE
D_0__Bacteria;D_1__Proteobacteria;D_2__Deltaproteobacteria;D_3__Myxococcales;D_4__VHS-B4-70;__;__	0	0	0	0	12	0	12	FALSE
D_0__Bacteria;D_1__Proteobacteria;D_2__Deltaproteobacteria;D_3__Myxococcales;D_4__bacteriap25;D_5__uncultured Acidobacteriales bacterium;D_6__	0	0	0	62	59	64	185	TRUE
D_0__Bacteria;D_1__Proteobacteria;D_2__Deltaproteobacteria;D_3__Myxococcales;D_4__bacteriap25;D_5__uncultured Geobacter sp.;D_6__	0	5	0	0	0	0	5	FALSE
D_0__Bacteria;D_1__Proteobacteria;D_2__Deltaproteobacteria;D_3__Myxococcales;D_4__mle1-27;D_5__uncultured Polyangiaceae bacterium;D_6__	0	0	0	0	0	11	11	FALSE
D_0__Bacteria;D_1__Proteobacteria;D_2__Deltaproteobacteria;D_3__Myxococcales;__;__;__	11	0	66	127	139	110	453	TRUE
D_0__Bacteria;D_1__Proteobacteria;D_2__Deltaproteobacteria;D_3__NB1-j;D_4__uncultured Acidobacteria bacterium;D_5__;D_6__	132	471	292	0	19	0	914	TRUE
D_0__Bacteria;D_1__Proteobacteria;D_2__Deltaproteobacteria;D_3__NB1-j;D_4__uncultured marine bacterium;D_5__;D_6__	0	0	14	0	0	0	14	FALSE
D_0__Bacteria;D_1__Proteobacteria;D_2__Deltaproteobacteria;D_3__NB1-j;D_4__uncultured organism;D_5__;D_6__	0	0	0	0	7	0	7	FALSE
D_0__Bacteria;D_1__Proteobacteria;D_2__Deltaproteobacteria;D_3__NB1-j;D_4__uncultured prokaryote;D_5__;D_6__	21	32	0	0	0	0	53	TRUE
D_0__Bacteria;D_1__Proteobacteria;D_2__Deltaproteobacteria;D_3__NB1-j;__;__;__	106	0	0	0	44	27	177	TRUE
D_0__Bacteria;D_1__Proteobacteria;D_2__Deltaproteobacteria;D_3__NKB15;D_4__uncultured hydrocarbon seep bacterium BPC065;D_5__;D_6__	0	31	28	0	16	15	90	TRUE
D_0__Bacteria;D_1__Proteobacteria;D_2__Deltaproteobacteria;D_3__Oligoflexales;D_4__0319-6G20;D_5__Olavius ilvae associated proteobacterium Delta 7;D_6__	0	3	0	0	0	0	3	FALSE
D_0__Bacteria;D_1__Proteobacteria;D_2__Deltaproteobacteria;D_3__Oligoflexales;D_4__0319-6G20;D_5__bacterium enrichment culture clone auto112_4W;D_6__	0	0	0	11	13	0	24	FALSE
D_0__Bacteria;D_1__Proteobacteria;D_2__Deltaproteobacteria;D_3__Oligoflexales;D_4__0319-6G20;D_5__marine metagenome;D_6__	0	0	0	0	0	6	6	FALSE
D_0__Bacteria;D_1__Proteobacteria;D_2__Deltaproteobacteria;D_3__Oligoflexales;D_4__0319-6G20;D_5__uncultured Anaeromyxobacter sp.;D_6__	0	0	0	11	0	10	21	FALSE
D_0__Bacteria;D_1__Proteobacteria;D_2__Deltaproteobacteria;D_3__Oligoflexales;D_4__0319-6G20;D_5__uncultured marine bacterium;D_6__	0	0	0	0	5	0	5	FALSE
D_0__Bacteria;D_1__Proteobacteria;D_2__Deltaproteobacteria;D_3__Oligoflexales;D_4__0319-6G20;__;__	0	10	19	114	115	100	358	TRUE
D_0__Bacteria;D_1__Proteobacteria;D_2__Deltaproteobacteria;D_3__Oligoflexales;D_4__Oligoflexaceae;D_5__Pseudobacteriovorax;D_6__uncultured delta proteobacterium	0	0	0	0	3	0	3	FALSE
D_0__Bacteria;D_1__Proteobacteria;D_2__Deltaproteobacteria;D_3__Oligoflexales;D_4__Oligoflexaceae;D_5__Silvanigrella;__	0	0	3	0	0	0	3	FALSE
D_0__Bacteria;D_1__Proteobacteria;D_2__Deltaproteobacteria;D_3__RCP2-54;D_4__uncultured Syntrophobacterales bacterium;D_5__;D_6__	0	0	0	0	0	7	7	FALSE
D_0__Bacteria;D_1__Proteobacteria;D_2__Deltaproteobacteria;D_3__SAR324 clade(Marine group B);__;__;__	0	0	0	0	19	0	19	FALSE
D_0__Bacteria;D_1__Proteobacteria;D_2__Deltaproteobacteria;D_3__Sva0485;D_4__bacterium enrichment culture clone 22(2013);D_5__;D_6__	0	139	75	54	128	51	447	TRUE
D_0__Bacteria;D_1__Proteobacteria;D_2__Deltaproteobacteria;D_3__Sva0485;D_4__bioreactor metagenome;D_5__;D_6__	0	0	0	98	90	138	326	TRUE
D_0__Bacteria;D_1__Proteobacteria;D_2__Deltaproteobacteria;D_3__Sva0485;D_4__uncultured Desulfobacteraceae bacterium;D_5__;D_6__	0	0	0	6	12	0	18	FALSE
D_0__Bacteria;D_1__Proteobacteria;D_2__Deltaproteobacteria;D_3__Sva0485;D_4__uncultured Desulfuromonadales bacterium;D_5__;D_6__	0	110	36	126	99	124	495	TRUE
D_0__Bacteria;D_1__Proteobacteria;D_2__Deltaproteobacteria;D_3__Sva0485;D_4__uncultured Spirochaetales bacterium;D_5__;D_6__	0	0	0	631	506	611	1748	TRUE
D_0__Bacteria;D_1__Proteobacteria;D_2__Deltaproteobacteria;D_3__Sva0485;D_4__uncultured Syntrophus sp.;D_5__;D_6__	0	0	0	259	173	193	625	TRUE
D_0__Bacteria;D_1__Proteobacteria;D_2__Deltaproteobacteria;D_3__Sva0485;D_4__uncultured proteobacterium;D_5__;D_6__	0	0	0	36	21	33	90	TRUE
D_0__Bacteria;D_1__Proteobacteria;D_2__Deltaproteobacteria;D_3__Sva0485;D_4__uncultured sediment bacterium;D_5__;D_6__	0	0	56	0	67	0	123	TRUE
D_0__Bacteria;D_1__Proteobacteria;D_2__Deltaproteobacteria;D_3__Sva0485;D_4__uncultured soil bacterium;D_5__;D_6__	0	0	0	54	52	53	159	TRUE
D_0__Bacteria;D_1__Proteobacteria;D_2__Deltaproteobacteria;D_3__Sva0485;__;__;__	82	0	0	1166	981	1025	3254	TRUE
D_0__Bacteria;D_1__Proteobacteria;D_2__Deltaproteobacteria;D_3__Syntrophobacterales;D_4__Syntrophaceae;D_5__Desulfobacca;D_6__delta proteobacterium enrichment culture clone VNC3B026	0	0	0	55	52	38	145	TRUE
D_0__Bacteria;D_1__Proteobacteria;D_2__Deltaproteobacteria;D_3__Syntrophobacterales;D_4__Syntrophaceae;D_5__Desulfobacca;D_6__uncultured soil bacterium	0	0	0	0	12	0	12	FALSE
D_0__Bacteria;D_1__Proteobacteria;D_2__Deltaproteobacteria;D_3__Syntrophobacterales;D_4__Syntrophaceae;D_5__Desulfobacca;__	9	0	221	0	0	0	230	TRUE
D_0__Bacteria;D_1__Proteobacteria;D_2__Deltaproteobacteria;D_3__Syntrophobacterales;D_4__Syntrophaceae;D_5__Desulfomonile;__	179	0	263	0	0	0	442	TRUE
D_0__Bacteria;D_1__Proteobacteria;D_2__Deltaproteobacteria;D_3__Syntrophobacterales;D_4__Syntrophaceae;D_5__Smithella;__	0	0	0	209	137	206	552	TRUE
D_0__Bacteria;D_1__Proteobacteria;D_2__Deltaproteobacteria;D_3__Syntrophobacterales;D_4__Syntrophaceae;D_5__Syntrophus;D_6__metagenome	0	0	0	989	958	915	2862	TRUE
D_0__Bacteria;D_1__Proteobacteria;D_2__Deltaproteobacteria;D_3__Syntrophobacterales;D_4__Syntrophaceae;D_5__Syntrophus;D_6__uncultured bacterium TA07	0	0	0	23	0	0	23	FALSE
D_0__Bacteria;D_1__Proteobacteria;D_2__Deltaproteobacteria;D_3__Syntrophobacterales;D_4__Syntrophaceae;D_5__Syntrophus;__	0	0	0	22	15	15	52	TRUE
D_0__Bacteria;D_1__Proteobacteria;D_2__Deltaproteobacteria;D_3__Syntrophobacterales;D_4__Syntrophaceae;D_5__uncultured;D_6__uncultured Syntrophaceae bacterium	0	0	0	155	125	144	424	TRUE
D_0__Bacteria;D_1__Proteobacteria;D_2__Deltaproteobacteria;D_3__Syntrophobacterales;D_4__Syntrophaceae;D_5__uncultured;D_6__uncultured Syntrophus sp.	0	0	0	335	249	307	891	TRUE
D_0__Bacteria;D_1__Proteobacteria;D_2__Deltaproteobacteria;D_3__Syntrophobacterales;D_4__Syntrophaceae;D_5__uncultured;D_6__uncultured microorganism	0	0	0	66	49	52	167	TRUE
D_0__Bacteria;D_1__Proteobacteria;D_2__Deltaproteobacteria;D_3__Syntrophobacterales;D_4__Syntrophaceae;D_5__uncultured;D_6__uncultured soil bacterium	0	0	0	268	81	157	506	TRUE
D_0__Bacteria;D_1__Proteobacteria;D_2__Deltaproteobacteria;D_3__Syntrophobacterales;D_4__Syntrophaceae;D_5__uncultured;__	0	0	0	78	41	30	149	TRUE
D_0__Bacteria;D_1__Proteobacteria;D_2__Deltaproteobacteria;D_3__Syntrophobacterales;D_4__Syntrophaceae;__;__	1343	1870	1640	2437	2346	2476	12112	TRUE
D_0__Bacteria;D_1__Proteobacteria;D_2__Deltaproteobacteria;D_3__Syntrophobacterales;D_4__Syntrophobacteraceae;D_5__Syntrophobacter;D_6__uncultured prokaryote	0	0	0	0	40	31	71	TRUE
D_0__Bacteria;D_1__Proteobacteria;D_2__Deltaproteobacteria;D_3__Syntrophobacterales;D_4__Syntrophobacteraceae;D_5__Syntrophobacter;__	0	0	0	202	103	131	436	TRUE
D_0__Bacteria;D_1__Proteobacteria;D_2__Deltaproteobacteria;D_3__Syntrophobacterales;D_4__Syntrophobacteraceae;D_5__uncultured;D_6__Deltaproteobacteria bacterium RBG_13_43_22	0	0	0	107	65	97	269	TRUE
D_0__Bacteria;D_1__Proteobacteria;D_2__Deltaproteobacteria;D_3__Syntrophobacterales;D_4__Syntrophobacteraceae;__;__	0	0	0	0	4	0	4	FALSE
D_0__Bacteria;D_1__Proteobacteria;D_2__Deltaproteobacteria;D_3__TX1A-33;D_4__uncultured bacterium;D_5__;D_6__	0	0	0	7	0	0	7	FALSE
D_0__Bacteria;D_1__Proteobacteria;D_2__Deltaproteobacteria;__;__;__;__	454	875	151	3805	2881	3327	11493	TRUE
D_0__Bacteria;D_1__Proteobacteria;D_2__Gammaproteobacteria;D_3__Aeromonadales;D_4__Aeromonadaceae;D_5__Aeromonas;__	0	0	0	56	103	372	531	TRUE
D_0__Bacteria;D_1__Proteobacteria;D_2__Gammaproteobacteria;D_3__Alteromonadales;D_4__Alteromonadaceae;D_5__Pseudobowmanella;D_6__Pseudobowmanella zhangzhouensis	0	0	0	5	0	0	5	FALSE
D_0__Bacteria;D_1__Proteobacteria;D_2__Gammaproteobacteria;D_3__Alteromonadales;D_4__Alteromonadaceae;D_5__Rheinheimera;__	0	0	0	14	0	0	14	FALSE
D_0__Bacteria;D_1__Proteobacteria;D_2__Gammaproteobacteria;D_3__Alteromonadales;D_4__Alteromonadaceae;__;__	0	0	0	39	0	0	39	FALSE
D_0__Bacteria;D_1__Proteobacteria;D_2__Gammaproteobacteria;D_3__Alteromonadales;D_4__Marinobacteraceae;D_5__Marinobacter;__	0	0	1175	0	23	0	1198	TRUE
D_0__Bacteria;D_1__Proteobacteria;D_2__Gammaproteobacteria;D_3__Alteromonadales;D_4__Pseudoalteromonadaceae;D_5__Pseudoalteromonas;__	0	268	1046	33	27	0	1374	TRUE
D_0__Bacteria;D_1__Proteobacteria;D_2__Gammaproteobacteria;D_3__Alteromonadales;D_4__Shewanellaceae;D_5__Shewanella;__	0	0	0	0	19	0	19	FALSE
D_0__Bacteria;D_1__Proteobacteria;D_2__Gammaproteobacteria;D_3__B2M28;D_4__uncultured Epsilonproteobacteria bacterium;D_5__;D_6__	0	321	0	140	278	24	763	TRUE
D_0__Bacteria;D_1__Proteobacteria;D_2__Gammaproteobacteria;D_3__Beggiatoales;D_4__Beggiatoaceae;__;__	0	0	0	0	4	0	4	FALSE
D_0__Bacteria;D_1__Proteobacteria;D_2__Gammaproteobacteria;D_3__Betaproteobacteriales;D_4__Burkholderiaceae;D_5__Achromobacter;__	0	0	0	10	51	24	85	TRUE
D_0__Bacteria;D_1__Proteobacteria;D_2__Gammaproteobacteria;D_3__Betaproteobacteriales;D_4__Burkholderiaceae;D_5__Alcaligenes;__	0	0	0	25	538	190	753	TRUE
D_0__Bacteria;D_1__Proteobacteria;D_2__Gammaproteobacteria;D_3__Betaproteobacteriales;D_4__Burkholderiaceae;D_5__Burkholderia-Caballeronia-Paraburkholderia;__	0	0	0	184	284	183	651	TRUE
D_0__Bacteria;D_1__Proteobacteria;D_2__Gammaproteobacteria;D_3__Betaproteobacteriales;D_4__Burkholderiaceae;D_5__Duganella;__	0	0	0	0	45	5	50	TRUE
D_0__Bacteria;D_1__Proteobacteria;D_2__Gammaproteobacteria;D_3__Betaproteobacteriales;D_4__Burkholderiaceae;D_5__Janthinobacterium;__	0	0	0	0	0	19	19	FALSE
D_0__Bacteria;D_1__Proteobacteria;D_2__Gammaproteobacteria;D_3__Betaproteobacteriales;D_4__Burkholderiaceae;D_5__Lautropia;D_6__unidentified	0	0	0	0	10	21	31	FALSE
D_0__Bacteria;D_1__Proteobacteria;D_2__Gammaproteobacteria;D_3__Betaproteobacteriales;D_4__Burkholderiaceae;D_5__Massilia;__	0	0	0	0	33	20	53	TRUE
D_0__Bacteria;D_1__Proteobacteria;D_2__Gammaproteobacteria;D_3__Betaproteobacteriales;D_4__Burkholderiaceae;D_5__Oligella;D_6__Oligella ureolytica DSM 18253	0	0	0	0	6	0	6	FALSE
D_0__Bacteria;D_1__Proteobacteria;D_2__Gammaproteobacteria;D_3__Betaproteobacteriales;D_4__Burkholderiaceae;D_5__Paenalcaligenes;__	0	0	0	0	17	0	17	FALSE
D_0__Bacteria;D_1__Proteobacteria;D_2__Gammaproteobacteria;D_3__Betaproteobacteriales;D_4__Burkholderiaceae;D_5__Parasutterella;D_6__gut metagenome	0	0	0	29	57	157	243	TRUE
D_0__Bacteria;D_1__Proteobacteria;D_2__Gammaproteobacteria;D_3__Betaproteobacteriales;D_4__Burkholderiaceae;D_5__Ramlibacter;__	0	0	0	139	188	141	468	TRUE
D_0__Bacteria;D_1__Proteobacteria;D_2__Gammaproteobacteria;D_3__Betaproteobacteriales;D_4__Burkholderiaceae;D_5__uncultured;D_6__Burkholderiales bacterium X4	0	0	0	0	0	6	6	FALSE
D_0__Bacteria;D_1__Proteobacteria;D_2__Gammaproteobacteria;D_3__Betaproteobacteriales;D_4__Burkholderiaceae;__;__	0	0	0	400	649	532	1581	TRUE
D_0__Bacteria;D_1__Proteobacteria;D_2__Gammaproteobacteria;D_3__Betaproteobacteriales;D_4__Chromobacteriaceae;D_5__Aquitalea;D_6__Anopheles coluzzii	0	0	0	225	255	223	703	TRUE
D_0__Bacteria;D_1__Proteobacteria;D_2__Gammaproteobacteria;D_3__Betaproteobacteriales;D_4__Chromobacteriaceae;D_5__Vogesella;__	0	0	0	18	32	16	66	TRUE
D_0__Bacteria;D_1__Proteobacteria;D_2__Gammaproteobacteria;D_3__Betaproteobacteriales;D_4__Chromobacteriaceae;__;__	0	0	0	0	9	0	9	FALSE
D_0__Bacteria;D_1__Proteobacteria;D_2__Gammaproteobacteria;D_3__Betaproteobacteriales;D_4__Gallionellaceae;__;__	0	0	0	0	15	0	15	FALSE
D_0__Bacteria;D_1__Proteobacteria;D_2__Gammaproteobacteria;D_3__Betaproteobacteriales;D_4__Hydrogenophilaceae;D_5__Hydrogenophilus;D_6__Hydrogenophilus hirschii	0	0	0	0	0	14	14	FALSE
D_0__Bacteria;D_1__Proteobacteria;D_2__Gammaproteobacteria;D_3__Betaproteobacteriales;D_4__Hydrogenophilaceae;D_5__Thiobacillus;D_6__iron-reducing bacterium enrichment culture clone FEA_2_H5	0	0	0	118	17	0	135	TRUE
D_0__Bacteria;D_1__Proteobacteria;D_2__Gammaproteobacteria;D_3__Betaproteobacteriales;D_4__Methylophilaceae;D_5__uncultured bacterium;D_6__	0	0	0	24	30	23	77	TRUE
D_0__Bacteria;D_1__Proteobacteria;D_2__Gammaproteobacteria;D_3__Betaproteobacteriales;D_4__Neisseriaceae;D_5__Neisseria;__	0	0	0	0	112	40	152	TRUE
D_0__Bacteria;D_1__Proteobacteria;D_2__Gammaproteobacteria;D_3__Betaproteobacteriales;D_4__Neisseriaceae;D_5__Uruburuella;D_6__metagenome	0	0	0	0	0	18	18	FALSE
D_0__Bacteria;D_1__Proteobacteria;D_2__Gammaproteobacteria;D_3__Betaproteobacteriales;D_4__Neisseriaceae;__;__	0	0	0	0	9	0	9	FALSE
D_0__Bacteria;D_1__Proteobacteria;D_2__Gammaproteobacteria;D_3__Betaproteobacteriales;D_4__Nitrosomonadaceae;D_5__Ellin6067;__	0	0	0	0	25	29	54	TRUE
D_0__Bacteria;D_1__Proteobacteria;D_2__Gammaproteobacteria;D_3__Betaproteobacteriales;D_4__Nitrosomonadaceae;D_5__MND1;D_6__uncultured proteobacterium	0	0	0	0	0	19	19	FALSE
D_0__Bacteria;D_1__Proteobacteria;D_2__Gammaproteobacteria;D_3__Betaproteobacteriales;D_4__Nitrosomonadaceae;D_5__MND1;__	0	0	0	0	14	0	14	FALSE
D_0__Bacteria;D_1__Proteobacteria;D_2__Gammaproteobacteria;D_3__Betaproteobacteriales;D_4__Nitrosomonadaceae;D_5__oc32;D_6__uncultured Rhodocyclaceae bacterium	0	0	0	0	16	0	16	FALSE
D_0__Bacteria;D_1__Proteobacteria;D_2__Gammaproteobacteria;D_3__Betaproteobacteriales;D_4__Rhodocyclaceae;D_5__Dechloromonas;D_6__beta proteobacterium Gu1-7	0	0	0	0	7	0	7	FALSE
D_0__Bacteria;D_1__Proteobacteria;D_2__Gammaproteobacteria;D_3__Betaproteobacteriales;D_4__Rhodocyclaceae;D_5__Sterolibacterium;D_6__mine drainage metagenome	0	0	0	18	28	11	57	TRUE
D_0__Bacteria;D_1__Proteobacteria;D_2__Gammaproteobacteria;D_3__Betaproteobacteriales;D_4__Rhodocyclaceae;__;__	0	0	0	34	26	9	69	TRUE
D_0__Bacteria;D_1__Proteobacteria;D_2__Gammaproteobacteria;D_3__Betaproteobacteriales;D_4__SC-I-84;D_5__uncultured Derxia sp.;D_6__	0	0	0	0	0	15	15	FALSE
D_0__Bacteria;D_1__Proteobacteria;D_2__Gammaproteobacteria;D_3__Betaproteobacteriales;D_4__SC-I-84;D_5__uncultured Nitrosomonadaceae bacterium;D_6__	0	0	0	0	0	5	5	FALSE
D_0__Bacteria;D_1__Proteobacteria;D_2__Gammaproteobacteria;D_3__Betaproteobacteriales;D_4__TRA3-20;D_5__uncultured Burkholderiaceae bacterium;D_6__	0	0	0	24	16	0	40	FALSE
D_0__Bacteria;D_1__Proteobacteria;D_2__Gammaproteobacteria;D_3__Betaproteobacteriales;D_4__TRA3-20;D_5__uncultured Rhodocyclaceae bacterium;D_6__	0	0	0	0	12	0	12	FALSE
D_0__Bacteria;D_1__Proteobacteria;D_2__Gammaproteobacteria;D_3__Betaproteobacteriales;__;__;__	0	0	6	954	1287	1102	3349	TRUE
D_0__Bacteria;D_1__Proteobacteria;D_2__Gammaproteobacteria;D_3__CCD24;__;__;__	0	0	0	32	29	0	61	TRUE
D_0__Bacteria;D_1__Proteobacteria;D_2__Gammaproteobacteria;D_3__Cardiobacteriales;D_4__Cardiobacteriaceae;__;__	0	0	0	0	5	0	5	FALSE
D_0__Bacteria;D_1__Proteobacteria;D_2__Gammaproteobacteria;D_3__Cardiobacteriales;D_4__Wohlfahrtiimonadaceae;D_5__Ignatzschineria;D_6__Ignatzschineria indica	0	0	0	0	13	0	13	FALSE
D_0__Bacteria;D_1__Proteobacteria;D_2__Gammaproteobacteria;D_3__Cellvibrionales;D_4__Halieaceae;D_5__Chromatocurvus;__	0	2	0	0	0	0	2	FALSE
D_0__Bacteria;D_1__Proteobacteria;D_2__Gammaproteobacteria;D_3__Cellvibrionales;D_4__Halieaceae;__;__	0	0	164	224	372	12	772	TRUE
D_0__Bacteria;D_1__Proteobacteria;D_2__Gammaproteobacteria;D_3__Cellvibrionales;D_4__Microbulbiferaceae;D_5__Microbulbifer;__	0	381	1004	9	0	0	1394	TRUE
D_0__Bacteria;D_1__Proteobacteria;D_2__Gammaproteobacteria;D_3__Cellvibrionales;D_4__Spongiibacteraceae;__;__	0	0	0	13	4	0	17	FALSE
D_0__Bacteria;D_1__Proteobacteria;D_2__Gammaproteobacteria;D_3__Cellvibrionales;__;__;__	0	0	0	0	11	0	11	FALSE
D_0__Bacteria;D_1__Proteobacteria;D_2__Gammaproteobacteria;D_3__Chromatiales;D_4__Chromatiaceae;D_5__Thiohalocapsa;D_6__uncultured gamma proteobacterium	0	382	0	7	9	0	398	TRUE
D_0__Bacteria;D_1__Proteobacteria;D_2__Gammaproteobacteria;D_3__Chromatiales;D_4__Chromatiaceae;D_5__Thiohalocapsa;__	95	0	0	0	0	0	95	TRUE
D_0__Bacteria;D_1__Proteobacteria;D_2__Gammaproteobacteria;D_3__Chromatiales;D_4__Chromatiaceae;__;__	0	93	0	0	30	0	123	TRUE
D_0__Bacteria;D_1__Proteobacteria;D_2__Gammaproteobacteria;D_3__Competibacterales;D_4__Competibacteraceae;D_5__Candidatus Competibacter;D_6__uncultured Candidatus Competibacter sp.	0	0	0	0	11	0	11	FALSE
D_0__Bacteria;D_1__Proteobacteria;D_2__Gammaproteobacteria;D_3__Coxiellales;D_4__Coxiellaceae;D_5__Coxiella;D_6__Coxiella sp. DG_40	0	0	0	0	16	13	29	FALSE
D_0__Bacteria;D_1__Proteobacteria;D_2__Gammaproteobacteria;D_3__Coxiellales;D_4__Coxiellaceae;D_5__Coxiella;D_6__uncultured Coxiellaceae bacterium	0	0	0	26	11	39	76	TRUE
D_0__Bacteria;D_1__Proteobacteria;D_2__Gammaproteobacteria;D_3__Coxiellales;D_4__Coxiellaceae;D_5__Coxiella;D_6__uncultured bacterium UASB_TL22	0	0	0	41	24	37	102	TRUE
D_0__Bacteria;D_1__Proteobacteria;D_2__Gammaproteobacteria;D_3__Coxiellales;D_4__Coxiellaceae;D_5__Coxiella;__	0	0	71	0	0	0	71	TRUE
D_0__Bacteria;D_1__Proteobacteria;D_2__Gammaproteobacteria;D_3__Diplorickettsiales;D_4__Diplorickettsiaceae;D_5__Aquicella;D_6__Aquicella sp. LY80	0	0	10	0	0	0	10	FALSE
D_0__Bacteria;D_1__Proteobacteria;D_2__Gammaproteobacteria;D_3__Diplorickettsiales;D_4__Diplorickettsiaceae;D_5__uncultured;D_6__agricultural soil bacterium SC-I-81	0	2	0	5	0	0	7	FALSE
D_0__Bacteria;D_1__Proteobacteria;D_2__Gammaproteobacteria;D_3__Ectothiorhodospirales;D_4__Ectothiorhodospiraceae;D_5__uncultured;D_6__sulfur-oxidizing bacterium OBII5	0	0	0	0	4	0	4	FALSE
D_0__Bacteria;D_1__Proteobacteria;D_2__Gammaproteobacteria;D_3__Ectothiorhodospirales;D_4__Thioalkalispiraceae;D_5__Thioalkalispira;__	0	0	0	139	74	36	249	TRUE
D_0__Bacteria;D_1__Proteobacteria;D_2__Gammaproteobacteria;D_3__Ectothiorhodospirales;D_4__Thioalkalispiraceae;D_5__Thiohalophilus;D_6__uncultured Thioalkalispiraceae bacterium	0	0	0	40	52	0	92	TRUE
D_0__Bacteria;D_1__Proteobacteria;D_2__Gammaproteobacteria;D_3__Ectothiorhodospirales;D_4__Thioalkalispiraceae;__;__	0	0	0	16	31	0	47	FALSE
D_0__Bacteria;D_1__Proteobacteria;D_2__Gammaproteobacteria;D_3__Ectothiorhodospirales;__;__;__	0	0	0	17	0	0	17	FALSE
D_0__Bacteria;D_1__Proteobacteria;D_2__Gammaproteobacteria;D_3__Enterobacteriales;D_4__Enterobacteriaceae;D_5__Buchnera;__	0	0	0	0	0	8	8	FALSE
D_0__Bacteria;D_1__Proteobacteria;D_2__Gammaproteobacteria;D_3__Enterobacteriales;D_4__Enterobacteriaceae;D_5__Escherichia-Shigella;__	0	0	0	44	475	182	701	TRUE
D_0__Bacteria;D_1__Proteobacteria;D_2__Gammaproteobacteria;D_3__Enterobacteriales;D_4__Enterobacteriaceae;D_5__Proteus;__	0	0	0	8	51	28	87	TRUE
D_0__Bacteria;D_1__Proteobacteria;D_2__Gammaproteobacteria;D_3__Enterobacteriales;D_4__Enterobacteriaceae;D_5__Providencia;__	0	0	0	0	34	0	34	FALSE
D_0__Bacteria;D_1__Proteobacteria;D_2__Gammaproteobacteria;D_3__Enterobacteriales;D_4__Enterobacteriaceae;D_5__Serratia;D_6__Serratia symbiotica str. Tucson	0	0	0	0	84	36	120	TRUE
D_0__Bacteria;D_1__Proteobacteria;D_2__Gammaproteobacteria;D_3__Enterobacteriales;D_4__Enterobacteriaceae;__;__	518	0	0	117	1359	680	2674	TRUE
D_0__Bacteria;D_1__Proteobacteria;D_2__Gammaproteobacteria;D_3__Gammaproteobacteria Incertae Sedis;D_4__Unknown Family;D_5__uncultured;D_6__bacterium enrichment culture clone 25(2013)	0	293	0	43	127	13	476	TRUE
D_0__Bacteria;D_1__Proteobacteria;D_2__Gammaproteobacteria;D_3__Halothiobacillales;D_4__Halothiobacillaceae;D_5__Halothiobacillus;D_6__Halothiobacillus neapolitanus c2	0	0	33	0	0	0	33	FALSE
D_0__Bacteria;D_1__Proteobacteria;D_2__Gammaproteobacteria;D_3__Halothiobacillales;D_4__Halothiobacillaceae;D_5__Halothiobacillus;D_6__Halothiobacillus sp. XI15	0	0	2	0	0	0	2	FALSE
D_0__Bacteria;D_1__Proteobacteria;D_2__Gammaproteobacteria;D_3__JG36-TzT-191;D_4__metagenome;D_5__;D_6__	0	0	0	13	12	11	36	FALSE
D_0__Bacteria;D_1__Proteobacteria;D_2__Gammaproteobacteria;D_3__JG36-TzT-191;D_4__uncultured proteobacterium;D_5__;D_6__	0	0	0	0	6	0	6	FALSE
D_0__Bacteria;D_1__Proteobacteria;D_2__Gammaproteobacteria;D_3__KI89A clade;D_4__uncultured organism;D_5__;D_6__	0	0	16	0	11	0	27	FALSE
D_0__Bacteria;D_1__Proteobacteria;D_2__Gammaproteobacteria;D_3__KI89A clade;__;__;__	0	100	0	0	0	0	100	TRUE
D_0__Bacteria;D_1__Proteobacteria;D_2__Gammaproteobacteria;D_3__Legionellales;D_4__Legionellaceae;D_5__Legionella;__	0	0	16	0	6	0	22	FALSE
D_0__Bacteria;D_1__Proteobacteria;D_2__Gammaproteobacteria;D_3__Methylococcales;D_4__Methylococcaceae;D_5__Methylocaldum;__	0	0	0	0	12	0	12	FALSE
D_0__Bacteria;D_1__Proteobacteria;D_2__Gammaproteobacteria;D_3__Methylococcales;D_4__Methylococcaceae;D_5__Methylococcus;D_6__uncultured bacterium	0	0	0	0	6	0	6	FALSE
D_0__Bacteria;D_1__Proteobacteria;D_2__Gammaproteobacteria;D_3__Methylococcales;D_4__Methylomonaceae;__;__	0	0	0	66	173	55	294	TRUE
D_0__Bacteria;D_1__Proteobacteria;D_2__Gammaproteobacteria;D_3__Oceanospirillales;D_4__Endozoicomonadaceae;D_5__Endozoicomonas;__	0	0	83	0	0	0	83	TRUE
D_0__Bacteria;D_1__Proteobacteria;D_2__Gammaproteobacteria;D_3__Oceanospirillales;D_4__Halomonadaceae;D_5__Chromohalobacter;D_6__uncultured Chromohalobacter sp.	0	0	0	0	0	30	30	FALSE
D_0__Bacteria;D_1__Proteobacteria;D_2__Gammaproteobacteria;D_3__Oceanospirillales;D_4__Halomonadaceae;D_5__Halomonas;__	0	0	0	0	9	8	17	FALSE
D_0__Bacteria;D_1__Proteobacteria;D_2__Gammaproteobacteria;D_3__Oceanospirillales;D_4__Halomonadaceae;D_5__Oceanospirillum;__	0	0	0	19	0	0	19	FALSE
D_0__Bacteria;D_1__Proteobacteria;D_2__Gammaproteobacteria;D_3__Oceanospirillales;D_4__Marinomonadaceae;D_5__Marinomonas;__	0	0	0	0	5	0	5	FALSE
D_0__Bacteria;D_1__Proteobacteria;D_2__Gammaproteobacteria;D_3__Oceanospirillales;D_4__Nitrincolaceae;__;__	0	0	0	190	26	33	249	TRUE
D_0__Bacteria;D_1__Proteobacteria;D_2__Gammaproteobacteria;D_3__Oceanospirillales;D_4__Pseudohongiellaceae;D_5__Pseudohongiella;D_6__uncultured sediment bacterium	0	0	0	39	33	0	72	TRUE
D_0__Bacteria;D_1__Proteobacteria;D_2__Gammaproteobacteria;D_3__Oceanospirillales;D_4__SS1-B-06-26;__;__	0	0	0	9	0	0	9	FALSE
D_0__Bacteria;D_1__Proteobacteria;D_2__Gammaproteobacteria;D_3__Oceanospirillales;D_4__Saccharospirillaceae;D_5__Bermanella;__	0	0	0	24	0	0	24	FALSE
D_0__Bacteria;D_1__Proteobacteria;D_2__Gammaproteobacteria;D_3__Oceanospirillales;D_4__Saccharospirillaceae;D_5__Oceanobacter;D_6__uncultured Thalassolituus sp.	0	0	0	104	9	0	113	TRUE
D_0__Bacteria;D_1__Proteobacteria;D_2__Gammaproteobacteria;D_3__Oceanospirillales;D_4__Saccharospirillaceae;__;__	0	0	0	969	108	74	1151	TRUE
D_0__Bacteria;D_1__Proteobacteria;D_2__Gammaproteobacteria;D_3__Oceanospirillales;__;__;__	0	0	0	81	0	0	81	TRUE
D_0__Bacteria;D_1__Proteobacteria;D_2__Gammaproteobacteria;D_3__Pasteurellales;D_4__Pasteurellaceae;__;__	0	0	0	157	1499	351	2007	TRUE
D_0__Bacteria;D_1__Proteobacteria;D_2__Gammaproteobacteria;D_3__Pseudomonadales;D_4__Moraxellaceae;D_5__Acinetobacter;__	0	0	2	31	288	60	381	TRUE
D_0__Bacteria;D_1__Proteobacteria;D_2__Gammaproteobacteria;D_3__Pseudomonadales;D_4__Moraxellaceae;D_5__Alkanindiges;__	0	0	0	79	141	30	250	TRUE
D_0__Bacteria;D_1__Proteobacteria;D_2__Gammaproteobacteria;D_3__Pseudomonadales;D_4__Moraxellaceae;D_5__Enhydrobacter;__	0	0	0	0	9	8	17	FALSE
D_0__Bacteria;D_1__Proteobacteria;D_2__Gammaproteobacteria;D_3__Pseudomonadales;D_4__Moraxellaceae;D_5__Moraxella;D_6__Moraxella catarrhalis	0	0	0	0	33	18	51	TRUE
D_0__Bacteria;D_1__Proteobacteria;D_2__Gammaproteobacteria;D_3__Pseudomonadales;D_4__Moraxellaceae;D_5__Perlucidibaca;D_6__Perlucidibaca sp. W2.10-39	0	0	0	11	0	0	11	FALSE
D_0__Bacteria;D_1__Proteobacteria;D_2__Gammaproteobacteria;D_3__Pseudomonadales;D_4__Moraxellaceae;D_5__Psychrobacter;__	0	0	0	0	7	0	7	FALSE
D_0__Bacteria;D_1__Proteobacteria;D_2__Gammaproteobacteria;D_3__Pseudomonadales;D_4__Pseudomonadaceae;D_5__Pseudomonas;D_6__Pseudomonas hussainii	0	0	0	45	0	0	45	FALSE
D_0__Bacteria;D_1__Proteobacteria;D_2__Gammaproteobacteria;D_3__Pseudomonadales;D_4__Pseudomonadaceae;D_5__Pseudomonas;__	571	361	0	35	257	113	1337	TRUE
D_0__Bacteria;D_1__Proteobacteria;D_2__Gammaproteobacteria;D_3__Salinisphaerales;D_4__Solimonadaceae;__;__	0	0	0	4	0	0	4	FALSE
D_0__Bacteria;D_1__Proteobacteria;D_2__Gammaproteobacteria;D_3__Steroidobacterales;D_4__Woeseiaceae;D_5__Woeseia;D_6__bacterium enrichment culture clone 57	0	0	0	33	54	11	98	TRUE
D_0__Bacteria;D_1__Proteobacteria;D_2__Gammaproteobacteria;D_3__TDNP-Wbc97-11-7-16;D_4__uncultured bacterium;D_5__;D_6__	0	0	0	0	22	0	22	FALSE
D_0__Bacteria;D_1__Proteobacteria;D_2__Gammaproteobacteria;D_3__Thiomicrospirales;D_4__Thiomicrospiraceae;D_5__Galenea;D_6__Galenea microaerophila	0	0	0	1109	101	120	1330	TRUE
D_0__Bacteria;D_1__Proteobacteria;D_2__Gammaproteobacteria;D_3__Thiomicrospirales;D_4__Thiomicrospiraceae;D_5__Thiomicrorhabdus;__	0	0	0	610	39	80	729	TRUE
D_0__Bacteria;D_1__Proteobacteria;D_2__Gammaproteobacteria;D_3__Thiomicrospirales;D_4__Thiomicrospiraceae;D_5__uncultured;D_6__uncultured gamma proteobacterium	0	0	0	199	0	0	199	TRUE
D_0__Bacteria;D_1__Proteobacteria;D_2__Gammaproteobacteria;D_3__Thiomicrospirales;D_4__Thiomicrospiraceae;__;__	0	0	0	88	0	0	88	TRUE
D_0__Bacteria;D_1__Proteobacteria;D_2__Gammaproteobacteria;D_3__Thiotrichales;D_4__Thiotrichaceae;D_5__uncultured;D_6__uncultured bacterium JM9_B4	0	0	0	16	0	0	16	FALSE
D_0__Bacteria;D_1__Proteobacteria;D_2__Gammaproteobacteria;D_3__Vibrionales;D_4__Vibrionaceae;D_5__Photobacterium;D_6__Photobacterium marinum	0	0	0	0	9	91	100	TRUE
D_0__Bacteria;D_1__Proteobacteria;D_2__Gammaproteobacteria;D_3__Vibrionales;D_4__Vibrionaceae;D_5__Vibrio;__	0	1883	0	22	49	53	2007	TRUE
D_0__Bacteria;D_1__Proteobacteria;D_2__Gammaproteobacteria;D_3__Vibrionales;D_4__Vibrionaceae;__;__	337	0	360	0	8	0	705	TRUE
D_0__Bacteria;D_1__Proteobacteria;D_2__Gammaproteobacteria;D_3__WD260;D_4__uncultured eubacterium WD260;D_5__;D_6__	0	0	0	0	17	15	32	FALSE
D_0__Bacteria;D_1__Proteobacteria;D_2__Gammaproteobacteria;D_3__Xanthomonadales;D_4__Rhodanobacteraceae;D_5__Dyella;D_6__Dyella sp. GR 3-10	0	0	0	0	10	0	10	FALSE
D_0__Bacteria;D_1__Proteobacteria;D_2__Gammaproteobacteria;D_3__Xanthomonadales;D_4__Rhodanobacteraceae;D_5__Dyella;__	0	0	0	0	14	0	14	FALSE
D_0__Bacteria;D_1__Proteobacteria;D_2__Gammaproteobacteria;D_3__Xanthomonadales;D_4__Rhodanobacteraceae;D_5__Rhodanobacter;D_6__bacterium enrichment culture clone SBIa2	0	0	0	0	31	0	31	FALSE
D_0__Bacteria;D_1__Proteobacteria;D_2__Gammaproteobacteria;D_3__Xanthomonadales;D_4__Rhodanobacteraceae;D_5__Rhodanobacter;__	0	0	0	20	33	22	75	TRUE
D_0__Bacteria;D_1__Proteobacteria;D_2__Gammaproteobacteria;D_3__Xanthomonadales;D_4__Rhodanobacteraceae;__;__	0	0	0	0	17	0	17	FALSE
D_0__Bacteria;D_1__Proteobacteria;D_2__Gammaproteobacteria;D_3__Xanthomonadales;D_4__Xanthomonadaceae;D_5__Arenimonas;__	0	0	0	0	16	0	16	FALSE
D_0__Bacteria;D_1__Proteobacteria;D_2__Gammaproteobacteria;D_3__Xanthomonadales;D_4__Xanthomonadaceae;D_5__Lysobacter;__	0	0	0	0	9	15	24	FALSE
D_0__Bacteria;D_1__Proteobacteria;D_2__Gammaproteobacteria;D_3__Xanthomonadales;D_4__Xanthomonadaceae;D_5__Stenotrophomonas;__	0	0	0	16	195	78	289	TRUE
D_0__Bacteria;D_1__Proteobacteria;D_2__Gammaproteobacteria;D_3__Xanthomonadales;D_4__Xanthomonadaceae;__;__	0	0	0	0	9	0	9	FALSE
D_0__Bacteria;D_1__Proteobacteria;D_2__Gammaproteobacteria;__;__;__;__	1406	4204	4532	5242	3691	1518	20593	TRUE
D_0__Bacteria;D_1__Proteobacteria;D_2__Proteobacteria bacterium CG1_02_64_396;D_3__;D_4__;D_5__;D_6__	0	0	0	0	10	0	10	FALSE
D_0__Bacteria;D_1__Proteobacteria;D_2__Zetaproteobacteria;D_3__Mariprofundales;D_4__Mariprofundaceae;D_5__Mariprofundus;__	0	0	0	0	9	0	9	FALSE
D_0__Bacteria;D_1__Proteobacteria;__;__;__;__;__	390	482	991	2178	2261	1926	8228	TRUE
D_0__Bacteria;D_1__Rokubacteria;D_2__NC10;D_3__Methylomirabilales;D_4__Methylomirabilaceae;D_5__Sh765B-TzT-35;D_6__candidate division NC10 bacterium RIFCSPLOWO2_02_FULL_66_22	0	0	0	0	0	21	21	FALSE
D_0__Bacteria;D_1__Rokubacteria;D_2__NC10;D_3__Methylomirabilales;D_4__Methylomirabilaceae;D_5__Sh765B-TzT-35;D_6__uncultured soil bacterium	0	0	0	160	86	88	334	TRUE
D_0__Bacteria;D_1__Rokubacteria;D_2__NC10;D_3__Methylomirabilales;D_4__Methylomirabilaceae;D_5__Sh765B-TzT-35;__	0	0	0	15	16	26	57	TRUE
D_0__Bacteria;D_1__Rokubacteria;D_2__NC10;D_3__Methylomirabilales;D_4__Methylomirabilaceae;D_5__Z114MB74;D_6__uncultured bacterium	0	0	0	41	41	44	126	TRUE
D_0__Bacteria;D_1__Rokubacteria;D_2__NC10;D_3__Methylomirabilales;D_4__Methylomirabilaceae;D_5__wb1-A12;D_6__candidate division NC10 bacterium SPGG6	0	0	35	0	0	0	35	FALSE
D_0__Bacteria;D_1__Rokubacteria;D_2__NC10;D_3__Rokubacteriales;__;__;__	0	0	0	0	8	0	8	FALSE
D_0__Bacteria;D_1__Spirochaetes;D_2__Leptospirae;D_3__Leptospirales;D_4__Leptospiraceae;D_5__RBG-16-49-21;D_6__Spirochaetes bacterium RBG_16_49_21	0	0	0	416	354	359	1129	TRUE
D_0__Bacteria;D_1__Spirochaetes;D_2__Leptospirae;D_3__Leptospirales;D_4__Leptospiraceae;D_5__RBG-16-49-21;__	0	0	0	15	13	15	43	FALSE
D_0__Bacteria;D_1__Spirochaetes;D_2__MVP-15;D_3__uncultured Spirochaetes bacterium;D_4__;D_5__;D_6__	0	0	0	3	0	0	3	FALSE
D_0__Bacteria;D_1__Spirochaetes;D_2__Spirochaetia;D_3__Brevinematales;D_4__Brevinemataceae;D_5__Brevinema;D_6__uncultured spirochete	0	0	0	0	13	3	16	FALSE
D_0__Bacteria;D_1__Spirochaetes;D_2__Spirochaetia;D_3__Spirochaetales;D_4__Spirochaetaceae;D_5__Candidatus Marispirochaeta;__	0	0	0	0	57	46	103	TRUE
D_0__Bacteria;D_1__Spirochaetes;D_2__Spirochaetia;D_3__Spirochaetales;D_4__Spirochaetaceae;D_5__Spirochaeta 2;D_6__Spirochaeta sp.	0	0	0	54	70	72	196	TRUE
D_0__Bacteria;D_1__Spirochaetes;D_2__Spirochaetia;D_3__Spirochaetales;D_4__Spirochaetaceae;D_5__Spirochaeta 2;D_6__bacterium YC-ZSS-LKJ93	0	0	0	0	10	0	10	FALSE
D_0__Bacteria;D_1__Spirochaetes;D_2__Spirochaetia;D_3__Spirochaetales;D_4__Spirochaetaceae;D_5__Spirochaeta 2;D_6__uncultured soil bacterium	0	0	0	8	8	0	16	FALSE
D_0__Bacteria;D_1__Spirochaetes;D_2__Spirochaetia;D_3__Spirochaetales;D_4__Spirochaetaceae;D_5__Treponema 2;D_6__Treponema sp. OC1	0	0	0	0	3	0	3	FALSE
D_0__Bacteria;D_1__Spirochaetes;D_2__Spirochaetia;D_3__Spirochaetales;D_4__Spirochaetaceae;__;__	0	0	8	106	90	97	301	TRUE
D_0__Bacteria;D_1__Synergistetes;D_2__Synergistia;D_3__Synergistales;D_4__Synergistaceae;D_5__JGI-0000079-D21;D_6__bacterium enrichment culture clone JCA2	0	0	0	5	0	18	23	FALSE
D_0__Bacteria;D_1__TA06;D_2__candidate division TA06 bacterium SM1_40;D_3__;D_4__;D_5__;D_6__	10	0	0	0	0	0	10	FALSE
D_0__Bacteria;D_1__TA06;D_2__uncultured bacterium SHA-114;D_3__;D_4__;D_5__;D_6__	8	8	0	0	0	19	35	FALSE
D_0__Bacteria;D_1__TA06;D_2__uncultured sediment bacterium;D_3__;D_4__;D_5__;D_6__	0	0	0	0	0	5	5	FALSE
D_0__Bacteria;D_1__TA06;__;__;__;__;__	0	0	0	0	0	3	3	FALSE
D_0__Bacteria;D_1__Tenericutes;D_2__Mollicutes;D_3__Haloplasmatales;D_4__Haloplasmataceae;D_5__Haloplasma;D_6__Inordinaticella fortuita	0	0	137	0	0	0	137	TRUE
D_0__Bacteria;D_1__Tenericutes;D_2__Mollicutes;D_3__Haloplasmatales;D_4__Haloplasmataceae;D_5__Haloplasma;D_6__bacterium enrichment culture	116	260	0	0	0	0	376	TRUE
D_0__Bacteria;D_1__Tenericutes;D_2__Mollicutes;D_3__Haloplasmatales;D_4__Haloplasmataceae;D_5__Haloplasma;D_6__uncultured low G+C Gram-positive bacterium	0	0	37	0	0	0	37	FALSE
D_0__Bacteria;D_1__Tenericutes;D_2__Mollicutes;D_3__Mollicutes RF39;D_4__unidentified;D_5__;D_6__	0	0	0	0	5	0	5	FALSE
D_0__Bacteria;D_1__Tenericutes;D_2__Mollicutes;D_3__Mycoplasmatales;D_4__Mycoplasmataceae;D_5__Mycoplasma;D_6__Mycoplasma hominis	0	0	0	0	19	0	19	FALSE
D_0__Bacteria;D_1__Tenericutes;D_2__Mollicutes;D_3__Mycoplasmatales;D_4__Mycoplasmataceae;D_5__Mycoplasma;D_6__uncultured rumen bacterium	0	0	0	2	5	6	13	FALSE
D_0__Bacteria;D_1__Tenericutes;D_2__Mollicutes;D_3__Mycoplasmatales;D_4__Mycoplasmataceae;D_5__Mycoplasma;__	0	0	0	0	13	9	22	FALSE
D_0__Bacteria;D_1__Tenericutes;D_2__Mollicutes;__;__;__;__	0	0	0	0	7	0	7	FALSE
D_0__Bacteria;D_1__Thermotogae;D_2__Thermotogae;D_3__Thermotogales;D_4__Fervidobacteriaceae;D_5__Fervidobacterium;D_6__uncultured Fervidobacterium sp.	0	0	0	2	0	0	2	FALSE
D_0__Bacteria;D_1__Verrucomicrobia;D_2__Verrucomicrobiae;D_3__Chthoniobacterales;D_4__Chthoniobacteraceae;D_5__Candidatus Udaeobacter;__	0	0	0	0	12	0	12	FALSE
D_0__Bacteria;D_1__Verrucomicrobia;D_2__Verrucomicrobiae;D_3__Chthoniobacterales;D_4__Chthoniobacteraceae;__;__	0	42	0	0	0	10	52	TRUE
D_0__Bacteria;D_1__Verrucomicrobia;D_2__Verrucomicrobiae;D_3__Chthoniobacterales;D_4__Terrimicrobiaceae;D_5__FukuN18 freshwater group;__	0	0	0	4	0	0	4	FALSE
D_0__Bacteria;D_1__Verrucomicrobia;D_2__Verrucomicrobiae;D_3__Chthoniobacterales;D_4__uncultured;D_5__uncultured Verrucomicrobia bacterium;D_6__	13	16	0	0	0	0	29	FALSE
D_0__Bacteria;D_1__Verrucomicrobia;D_2__Verrucomicrobiae;D_3__Chthoniobacterales;D_4__uncultured;D_5__uncultured Verrucomicrobiales bacterium;D_6__	0	29	0	0	0	0	29	FALSE
D_0__Bacteria;D_1__Verrucomicrobia;D_2__Verrucomicrobiae;D_3__LD1-PB3;D_4__uncultured soil bacterium;D_5__;D_6__	3	0	0	0	0	0	3	FALSE
D_0__Bacteria;D_1__Verrucomicrobia;D_2__Verrucomicrobiae;D_3__Opitutales;D_4__Opitutaceae;D_5__Lacunisphaera;D_6__Verrucomicrobia bacterium RIFCSPLOWO2_12_FULL_64_8	0	0	0	22	22	25	69	TRUE
D_0__Bacteria;D_1__Verrucomicrobia;D_2__Verrucomicrobiae;D_3__Opitutales;D_4__Opitutaceae;D_5__Lacunisphaera;D_6__uncultured Opitutus sp.	0	0	0	10	0	10	20	FALSE
D_0__Bacteria;D_1__Verrucomicrobia;D_2__Verrucomicrobiae;D_3__Opitutales;D_4__Opitutaceae;__;__	0	0	2	0	0	0	2	FALSE
D_0__Bacteria;D_1__Verrucomicrobia;D_2__Verrucomicrobiae;D_3__Opitutales;D_4__Puniceicoccaceae;D_5__Verruc-01;D_6__uncultured Verrucomicrobiae bacterium	0	8	0	0	23	0	31	FALSE
D_0__Bacteria;D_1__Verrucomicrobia;D_2__Verrucomicrobiae;D_3__Opitutales;D_4__Puniceicoccaceae;__;__	0	0	0	6	0	0	6	FALSE
D_0__Bacteria;D_1__Verrucomicrobia;D_2__Verrucomicrobiae;D_3__Pedosphaerales;D_4__Pedosphaeraceae;D_5__ADurb.Bin063-1;D_6__uncultured prokaryote	0	0	0	0	19	0	19	FALSE
D_0__Bacteria;D_1__Verrucomicrobia;D_2__Verrucomicrobiae;D_3__Pedosphaerales;D_4__Pedosphaeraceae;D_5__ADurb.Bin063-1;__	0	0	0	511	516	538	1565	TRUE
D_0__Bacteria;D_1__Verrucomicrobia;D_2__Verrucomicrobiae;D_3__Pedosphaerales;D_4__Pedosphaeraceae;D_5__Pedosphaera;D_6__Pedosphaera parvula Ellin514	0	0	0	20	12	0	32	FALSE
D_0__Bacteria;D_1__Verrucomicrobia;D_2__Verrucomicrobiae;D_3__Pedosphaerales;D_4__Pedosphaeraceae;D_5__Pedosphaera;D_6__uncultured Verrucomicrobia bacterium	0	0	0	12	32	24	68	TRUE
D_0__Bacteria;D_1__Verrucomicrobia;D_2__Verrucomicrobiae;D_3__Pedosphaerales;D_4__Pedosphaeraceae;D_5__bacterium enrichment culture clone heteroA59_4W;D_6__	0	0	0	9	9	7	25	FALSE
D_0__Bacteria;D_1__Verrucomicrobia;D_2__Verrucomicrobiae;D_3__Pedosphaerales;D_4__Pedosphaeraceae;D_5__uncultured Pedosphaera sp.;D_6__	0	0	0	0	20	0	20	FALSE
D_0__Bacteria;D_1__Verrucomicrobia;D_2__Verrucomicrobiae;D_3__Pedosphaerales;D_4__Pedosphaeraceae;D_5__uncultured verrucomicrobium DEV008;D_6__	0	0	0	95	59	75	229	TRUE
D_0__Bacteria;D_1__Verrucomicrobia;D_2__Verrucomicrobiae;D_3__Pedosphaerales;D_4__Pedosphaeraceae;__;__	0	49	0	155	143	150	497	TRUE
D_0__Bacteria;D_1__Verrucomicrobia;D_2__Verrucomicrobiae;D_3__S-BQ2-57 soil group;D_4__metagenome;D_5__;D_6__	0	0	0	0	6	0	6	FALSE
D_0__Bacteria;D_1__Verrucomicrobia;D_2__Verrucomicrobiae;D_3__S-BQ2-57 soil group;__;__;__	0	0	0	51	52	62	165	TRUE
D_0__Bacteria;D_1__Verrucomicrobia;D_2__Verrucomicrobiae;D_3__Verrucomicrobiales;D_4__Akkermansiaceae;D_5__Akkermansia;D_6__unidentified	0	0	0	3	25	15	43	FALSE
D_0__Bacteria;D_1__Verrucomicrobia;D_2__Verrucomicrobiae;D_3__Verrucomicrobiales;D_4__Rubritaleaceae;D_5__Luteolibacter;__	24	69	0	0	0	0	93	TRUE
D_0__Bacteria;D_1__Verrucomicrobia;D_2__Verrucomicrobiae;D_3__Verrucomicrobiales;D_4__Rubritaleaceae;__;__	0	26	0	0	0	0	26	FALSE
D_0__Bacteria;D_1__Verrucomicrobia;D_2__Verrucomicrobiae;D_3__Verrucomicrobiales;__;__;__	0	13	24	0	0	0	37	FALSE
D_0__Bacteria;D_1__Verrucomicrobia;D_2__Verrucomicrobiae;__;__;__;__	44	8	0	0	17	16	85	TRUE
D_0__Bacteria;D_1__WOR-1;D_2__candidate division WOR-1 bacterium RIFCSPHIGHO2_02_FULL_45_12;D_3__;D_4__;D_5__;D_6__	0	0	0	0	19	0	19	FALSE
D_0__Bacteria;D_1__WOR-1;D_2__candidate division WOR_1 bacterium DG_54_3;D_3__;D_4__;D_5__;D_6__	0	0	0	0	0	7	7	FALSE
D_0__Bacteria;D_1__WOR-1;__;__;__;__;__	0	0	0	37	15	99	151	TRUE
D_0__Bacteria;D_1__WS2;__;__;__;__;__	0	13	0	0	0	0	13	FALSE
D_0__Bacteria;D_1__Zixibacteria;D_2__bacterium enrichment culture clone Anammox_55;D_3__;D_4__;D_5__;D_6__	0	0	0	34	34	30	98	TRUE
D_0__Bacteria;D_1__Zixibacteria;D_2__bioreactor metagenome;D_3__;D_4__;D_5__;D_6__	14	0	0	0	0	0	14	FALSE
D_0__Bacteria;D_1__Zixibacteria;D_2__candidate division Zixibacteria bacterium RBG_16_43_9;D_3__;D_4__;D_5__;D_6__	0	0	0	9	16	17	42	FALSE
D_0__Bacteria;D_1__Zixibacteria;D_2__candidate division Zixibacteria bacterium SM1_73;D_3__;D_4__;D_5__;D_6__	0	0	0	13	0	1	14	FALSE
D_0__Bacteria;D_1__Zixibacteria;D_2__uncultured Nitrospinaceae bacterium;D_3__;D_4__;D_5__;D_6__	0	0	2	15	0	13	30	FALSE
D_0__Bacteria;D_1__Zixibacteria;D_2__uncultured candidate division TA06 bacterium;D_3__;D_4__;D_5__;D_6__	0	0	0	233	187	209	629	TRUE
D_0__Bacteria;D_1__Zixibacteria;D_2__uncultured delta proteobacterium;D_3__;D_4__;D_5__;D_6__	0	0	0	0	17	0	17	FALSE
D_0__Bacteria;D_1__Zixibacteria;D_2__uncultured prokaryote;D_3__;D_4__;D_5__;D_6__	0	0	0	31	21	26	78	TRUE
D_0__Bacteria;D_1__Zixibacteria;D_2__uncultured soil bacterium;D_3__;D_4__;D_5__;D_6__	0	0	0	32	0	0	32	FALSE
D_0__Bacteria;D_1__Zixibacteria;__;__;__;__;__	0	0	37	135	138	193	503	TRUE
D_0__Bacteria;__;__;__;__;__;__	5620	7293	7388	20723	16664	22131	79819	TRUE
Unassigned;__;__;__;__;__;__	377	374	326	3116	1488	2787	8468	TRUE
