# Supplementary material for: Large-scale differences in diversity and functional adaptations of prokaryotic communities from conserved and anthropogenically impacted mangrove sediments in a tropical estuary
Source: PeerJ. 2021 Sep 23;9:e12229. doi: 10.7717/peerj.12229 (PMC8465992; doi:10.7717/peerj.12229)
Supplement: Supplemental Information 5 — PICRUSt2 scores taxa using the nearest sequenced taxon index (NSTI). This records a distance between the query 16S rRNA and the reference. This table contains the median and standard deviation of all queries assigned to a family. [file peerj-09-12229-s005.xlsx]

## Sheet: Supplemental_Table_3_asv2nsti
#taxa	mean_nsti	median_nsti	std_nsti	median-std
Bacteria_Bacteroidetes_Ignavibacteria_Ignavibacteriales_Ignavibacteriaceae	0.127922	0.120226	0.0384096	0.0818164
Bacteria_Proteobacteria_Gammaproteobacteria_Cellvibrionales_Halieaceae	0.157516	0.081858	0.154086	-0.0722279
Bacteria_Bacteroidetes_Bacteroidia_Chitinophagales_Saprospiraceae	0.345822	0.32813	0.116012	0.212118
Archaea_Euryarchaeota_Methanomicrobia_Methanosarcinales_Methanosaetaceae	0.180858	0.074482	0.327805	-0.253323
Bacteria_Verrucomicrobia_Verrucomicrobiae_Pedosphaerales_Pedosphaeraceae	0.204385	0.21704	0.0915072	0.125533
Bacteria_Firmicutes_Bacilli_Bacillales_Family XII	0.20309	0.032397	0.33586	-0.303463
Bacteria_Proteobacteria_Deltaproteobacteria_Syntrophobacterales_Syntrophaceae	0.231889	0.272645	0.178447	0.0941983
Bacteria_Firmicutes_Clostridia_Clostridiales_Ruminococcaceae	0.150388	0.108411	0.129462	-0.0210511
Bacteria_Chloroflexi_Anaerolineae_Anaerolineales_Anaerolineaceae	0.241651	0.22127	0.171628	0.0496424
Bacteria_Proteobacteria_Deltaproteobacteria_Myxococcales_Sandaracinaceae	0.400102	0.442016	0.113073	0.328943
Bacteria_Proteobacteria_Deltaproteobacteria_Desulfobacterales_Desulfobacteraceae	0.132636	0.077014	0.130753	-0.053739
Bacteria_Fibrobacteres_Chitinivibrionia_uncultured_uncultured Bacteroidetes/Chlorobi group bacterium	0.465739	0.465376	0.0178496	0.447526
Bacteria_Proteobacteria_Gammaproteobacteria_B2M28_uncultured Epsilonproteobacteria bacterium	0.169754	0.171811	0.119632	0.0521793
Bacteria_Bacteroidetes_Bacteroidia_Bacteroidales_Tannerellaceae	0.0997437	0.0775165	0.0705897	0.00692684
Bacteria_Proteobacteria_Deltaproteobacteria_Sva0485_uncultured Syntrophus sp.	0.278755	0.257755	0.0631916	0.194563
Bacteria_Proteobacteria_Gammaproteobacteria_Methylococcales_Methylococcaceae	0.042929	0.042929	0.022226	0.020703
Bacteria_Proteobacteria_Gammaproteobacteria_Betaproteobacteriales_Burkholderiaceae	0.0508058	0.028378	0.0558644	-0.0274864
Archaea_Euryarchaeota_Methanomicrobia_Methanomicrobiales_Methanomicrobiaceae	0.186962	0.147345	0.0781512	0.0691938
Bacteria_Actinobacteria_Actinobacteria_Actinomycetales_Actinomycetaceae	0.14285	0.14285	0	0.14285
Bacteria_Planctomycetes_Phycisphaerae_MSBL9_SG8-4	0.169162	0.113657	0.136521	-0.0228637
Bacteria_Proteobacteria_Deltaproteobacteria_NB1-j_uncultured Acidobacteria bacterium	0.425048	0.431613	0.069472	0.362141
Archaea_Euryarchaeota_Thermoplasmata_Marine Benthic Group D and DHVEG-1_archaeon enrichment culture clone AOM-Clone-F5	0.557877	0.557877	0	0.557877
Bacteria_Verrucomicrobia_Verrucomicrobiae_Chthoniobacterales_uncultured	0.560944	0.576117	0.0313095	0.544807
Bacteria_Firmicutes_Erysipelotrichia_Erysipelotrichales_Erysipelotrichaceae	0.113662	0.0325195	0.133904	-0.101385
Bacteria_Bacteroidetes_Bacteroidia_Sphingobacteriales_Lentimicrobiaceae	0.199151	0.145823	0.173292	-0.0274691
Bacteria_Actinobacteria_Acidimicrobiia_Actinomarinales_uncultured	0.534288	0.676339	0.216664	0.459675
Bacteria_Firmicutes_Clostridia_Clostridiales_Lachnospiraceae	0.130528	0.119145	0.107189	0.0119557
Bacteria_Proteobacteria_Deltaproteobacteria_Desulfobacterales_Desulfobulbaceae	0.186031	0.108754	0.186765	-0.0780108
Bacteria_Proteobacteria_Deltaproteobacteria_Desulfarculales_Desulfarculaceae	0.0956896	0.095756	0.0298245	0.0659315
Bacteria_Firmicutes_Bacilli_Bacillales_Alicyclobacillaceae	0.298987	0.147801	0.259656	-0.111855
Bacteria_Planctomycetes_Phycisphaerae_Phycisphaerales_Phycisphaeraceae	0.891133	0.8974	0.24981	0.64759
Archaea_Euryarchaeota_Methanomicrobia_Methanosarcinales_Methermicoccaceae	0.363252	0.363252	0.0754695	0.287783
Bacteria_Acidobacteria_Acidobacteriia_Acidobacteriales_uncultured Acidobacteriaceae bacterium	0.21948	0.21948	0	0.21948
Bacteria_Firmicutes_Bacilli_Lactobacillales_Streptococcaceae	0.023811	0.000101	0.0328472	-0.0327462
Bacteria_Proteobacteria_Gammaproteobacteria_Oceanospirillales_Nitrincolaceae	0.0671025	0.0671025	0.0034125	0.06369
Bacteria_Bacteroidetes_Bacteroidia_Bacteroidales_Prevotellaceae	0.185063	0.107251	0.191052	-0.0838003
Bacteria_Actinobacteria_Actinobacteria_Corynebacteriales_Mycobacteriaceae	0.108665	0.065329	0.135368	-0.0700392
Bacteria_Proteobacteria_Alphaproteobacteria_Rhodobacterales_Rhodobacteraceae	0.106394	0.084181	0.0987443	-0.0145633
Bacteria_Bacteroidetes_Ignavibacteria_Kryptoniales_BSV26	0.403336	0.293819	0.155797	0.138022
Bacteria_Proteobacteria_Gammaproteobacteria_Vibrionales_Vibrionaceae	0.103457	0.0723605	0.120775	-0.048414
Bacteria_Proteobacteria_Gammaproteobacteria_Xanthomonadales_Rhodanobacteraceae	0.0269298	0.015109	0.0316381	-0.0165291
Bacteria_Proteobacteria_Gammaproteobacteria_KI89A clade_uncultured organism	0.263193	0.263193	0.223911	0.039282
Bacteria_Proteobacteria_Gammaproteobacteria_Pseudomonadales_Moraxellaceae	0.0467348	0.032417	0.0499992	-0.0175822
Bacteria_Firmicutes_Clostridia_Clostridiales_Clostridiaceae 1	0.171833	0.192357	0.152441	0.0399162
Archaea_Thaumarchaeota_Nitrososphaeria_Nitrosopumilales_Nitrosopumilaceae	0.308302	0.305341	0.0972553	0.208086
Bacteria_Planctomycetes_Planctomycetacia_Planctomycetales_Rubinisphaeraceae	0.45286	0.4484	0.0641417	0.384259
Bacteria_Proteobacteria_Gammaproteobacteria_Competibacterales_Competibacteraceae	0.157765	0.157765	0	0.157765
Bacteria_Proteobacteria_Gammaproteobacteria_Betaproteobacteriales_Methylophilaceae	0.216553	0.216553	0	0.216553
Bacteria_Bacteroidetes_Ignavibacteria_Ignavibacteriales_PHOS-HE36	0.107438	0.107438	0.001077	0.106361
Bacteria_Proteobacteria_Alphaproteobacteria_Tistrellales_Geminicoccaceae	0.373353	0.373353	0.069162	0.304191
Bacteria_Proteobacteria_Gammaproteobacteria_Oceanospirillales_Halomonadaceae	0.0212387	0.0053	0.0225803	-0.0172803
Bacteria_Proteobacteria_Gammaproteobacteria_Ectothiorhodospirales_Ectothiorhodospiraceae	0.166428	0.166428	0	0.166428
Bacteria_Fibrobacteres_Chitinivibrionia_uncultured_uncultured Microgenomates group bacterium	0.463151	0.463151	0.0012845	0.461866
Bacteria_Actinobacteria_Acidimicrobiia_Microtrichales_Ilumatobacteraceae	0.178149	0.173516	0.057063	0.116453
Bacteria_Planctomycetes_Planctomycetacia_Pirellulales_Pirellulaceae	0.451817	0.468488	0.189061	0.279426
Bacteria_Firmicutes_Bacilli_Bacillales_Paenibacillaceae	0.119945	0.033755	0.208831	-0.175076
Bacteria_Proteobacteria_Deltaproteobacteria_Sva0485_bacterium enrichment culture clone 22(2013)	0.492518	0.526575	0.159586	0.366989
Bacteria_Firmicutes_Bacilli_Lactobacillales_Lactobacillaceae	0.024347	0.008874	0.0254652	-0.0165912
Bacteria_Firmicutes_Clostridia_Clostridiales_Clostridiaceae 3	0.371807	0.393104	0.0957259	0.297378
Bacteria_Proteobacteria_Deltaproteobacteria_NKB15_uncultured hydrocarbon seep bacterium BPC065	0.268714	0.268714	0	0.268714
Archaea_Euryarchaeota_Thermoplasmata_Marine Benthic Group D and DHVEG-1_uncultured archaeon BURTON-12	0.556364	0.557877	0.00427847	0.553599
Bacteria_Proteobacteria_Deltaproteobacteria_Oligoflexales_0319-6G20	0.193204	0.128228	0.175048	-0.0468197
Bacteria_Proteobacteria_Gammaproteobacteria_Betaproteobacteriales_Hydrogenophilaceae	0.0362713	0.026475	0.0260583	0.000416685
Bacteria_Actinobacteria_Thermoleophilia_Gaiellales_uncultured	0.360926	0.38185	0.10021	0.28164
Bacteria_Chloroflexi_Anaerolineae_Ardenticatenales_uncultured	0.546953	0.349505	0.272792	0.0767131
Bacteria_Proteobacteria_Alphaproteobacteria_Caulobacterales_Caulobacteraceae	0.0510439	0.051672	0.0449359	0.00673615
Bacteria_Bacteroidetes_Bacteroidia_Bacteroidales_Bacteroidaceae	0.0614	0.0331605	0.0785268	-0.0453663
Bacteria_Nitrospirae_Nitrospira_Nitrospirales_Nitrospiraceae	0.0800633	0.0349985	0.100737	-0.0657382
Bacteria_Acidobacteria_Thermoanaerobaculia_Thermoanaerobaculales_Thermoanaerobaculaceae	0.418891	0.414109	0.271714	0.142395
Bacteria_Proteobacteria_Gammaproteobacteria_Enterobacteriales_Enterobacteriaceae	0.0704452	0.015572	0.099919	-0.084347
Bacteria_Bacteroidetes_Rhodothermia_Rhodothermales_Rhodothermaceae	0.251849	0.271467	0.0531392	0.218328
Bacteria_Elusimicrobia_Elusimicrobia_MD2894-B20_uncultured bacterium	0.405575	0.405575	0	0.405575
Bacteria_Firmicutes_Bacilli_Bacillales_Bacillaceae	0.136852	0.111912	0.13553	-0.0236175
Bacteria_Proteobacteria_Gammaproteobacteria_Betaproteobacteriales_Chromobacteriaceae	0.103267	0.088585	0.0536232	0.0349618
Bacteria_Calditrichaeota_Calditrichia_Calditrichales_Calditrichaceae	0.191884	0.138003	0.114665	0.0233378
Bacteria_Planctomycetes_Phycisphaerae_CCM11a_bacterium enrichment culture clone E27	0.559697	0.559697	0	0.559697
Bacteria_Bacteroidetes_Bacteroidia_Bacteroidales_Rikenellaceae	0.0712631	0.0658555	0.0562671	0.00958843
Bacteria_Latescibacteria_Latescibacteria_Latescibacterales_Latescibacteraceae	0.43734	0.403786	0.325237	0.078549
Bacteria_Proteobacteria_Gammaproteobacteria_Coxiellales_Coxiellaceae	0.124174	0.109106	0.0836369	0.0254691
Archaea_Euryarchaeota_Thermoplasmata_Methanomassiliicoccales_uncultured	0.650397	0.654524	0.0362175	0.618306
Bacteria_Tenericutes_Mollicutes_Haloplasmatales_Haloplasmataceae	0.393108	0.408424	0.0315503	0.376874
Bacteria_Actinobacteria_Actinobacteria_Bifidobacteriales_Bifidobacteriaceae	0.0721943	0.0619355	0.0428269	0.0191086
Bacteria_Proteobacteria_Deltaproteobacteria_Myxococcales_VHS-B4-70	0.206291	0.206291	0.104516	0.101775
Bacteria_Proteobacteria_Alphaproteobacteria_Micavibrionales_Micavibrionaceae	0.328622	0.328622	0	0.328622
Bacteria_Chloroflexi_Anaerolineae_SBR1031_anaerobic digester metagenome	0.454346	0.360969	0.256306	0.104663
Bacteria_Chloroflexi_Dehalococcoidia_GIF3_Dehalococcoidia bacterium SCGC AB-540-C11	0.0649106	0.060619	0.062953	-0.002334
Bacteria_Chlamydiae_Chlamydiae_Chlamydiales_cvE6	0.59077	0.605069	0.104916	0.500153
Bacteria_Proteobacteria_Alphaproteobacteria_Rickettsiales_Mitochondria	3.60856	2.86823	1.25521	1.61302
Bacteria_Proteobacteria_Deltaproteobacteria_Sva0485_uncultured Spirochaetales bacterium	0.299879	0.289679	0.0699333	0.219745
Bacteria_Chloroflexi_Dehalococcoidia_Dehalococcoidales_Dehalococcoidaceae	0.188397	0.174708	0.0918261	0.0828819
Bacteria_Synergistetes_Synergistia_Synergistales_Synergistaceae	0.366653	0.366653	0	0.366653
Bacteria_Firmicutes_Clostridia_Clostridiales_Peptostreptococcaceae	0.135287	0.075225	0.188913	-0.113688
Bacteria_Proteobacteria_Deltaproteobacteria_Deltaproteobacteria Incertae Sedis_Syntrophorhabdaceae	0.230569	0.256592	0.144131	0.112461
Bacteria_Proteobacteria_Alphaproteobacteria_Rhizobiales_Hyphomicrobiaceae	0.0591862	0.08227	0.0333242	0.0489458
Bacteria_Proteobacteria_Alphaproteobacteria_Paracaedibacterales_Paracaedibacteraceae	0.265274	0.265274	0	0.265274
Archaea_Euryarchaeota_Methanobacteria_Methanobacteriales_Methanobacteriaceae	0.110508	0.0959845	0.063499	0.0324855
Bacteria_Bacteroidetes_Bacteroidia_Flavobacteriales_Weeksellaceae	0.0395705	0.0395705	0.0394205	0.00015
Bacteria_Planctomycetes_Planctomycetacia_Gemmatales_Gemmataceae	0.627941	0.662526	0.271736	0.39079
Bacteria_Proteobacteria_Alphaproteobacteria_Sphingomonadales_Sphingomonadaceae	0.103437	0.057171	0.118835	-0.0616638
Bacteria_Proteobacteria_Deltaproteobacteria_Apal-E12_uncultured bacterium	0.449228	0.449228	0	0.449228
Bacteria_Epsilonbacteraeota_Campylobacteria_Campylobacterales_Thiovulaceae	0.130262	0.120121	0.0991066	0.0210149
Bacteria_Proteobacteria_Alphaproteobacteria_Caulobacterales_Parvularculaceae	0.22534	0.246068	0.0326904	0.213378
Bacteria_Bacteroidetes_Bacteroidia_Bacteroidales_SB-5	0.312946	0.222811	0.194986	0.027825
Bacteria_Proteobacteria_Alphaproteobacteria_Rhizobiales_Xanthobacteraceae	0.0968742	0.0661355	0.0966086	-0.0304731
Bacteria_Proteobacteria_Gammaproteobacteria_Alteromonadales_Marinobacteraceae	0.094534	0.104744	0.026678	0.078066
Bacteria_Spirochaetes_Leptospirae_Leptospirales_Leptospiraceae	0.0571033	0.0772	0.0371183	0.0400817
Bacteria_Proteobacteria_Gammaproteobacteria_Methylococcales_Methylomonaceae	0.077087	0.055042	0.0623347	-0.00729275
Archaea_Euryarchaeota_Thermoplasmata_uncultured_uncultured archaeon WCHD3-16	0.643942	0.643942	0.103355	0.540587
Bacteria_Proteobacteria_Gammaproteobacteria_Gammaproteobacteria Incertae Sedis_Unknown Family	0.262258	0.262258	0.076131	0.186127
Bacteria_Firmicutes_Negativicutes_Selenomonadales_Acidaminococcaceae	0.205841	0.220611	0.137516	0.0830958
Bacteria_Bacteroidetes_Ignavibacteria_Kryptoniales_MSB-3C8	0.352547	0.355339	0.0922265	0.263112
Bacteria_Bacteroidetes_Bacteroidia_Bacteroidales_Muribaculaceae	0.135827	0.089726	0.105503	-0.0157766
Bacteria_Omnitrophicaeota_Omnitrophia_Omnitrophales_Omnitrophaceae	0.211954	0.211954	0.112216	0.099738
Bacteria_Actinobacteria_Coriobacteriia_OPB41_uncultured Coriobacteriales bacterium	0.301231	0.301231	0	0.301231
Archaea_Euryarchaeota_Methanomicrobia_ANME-1_ANME-1a	0.480467	0.480467	0	0.480467
Bacteria_Actinobacteria_Actinobacteria_Micrococcales_Micrococcaceae	0.236128	0.050178	0.362291	-0.312113
Bacteria_Firmicutes_Bacilli_Lactobacillales_Enterococcaceae	0.084662	0.084662	0	0.084662
Bacteria_Chloroflexi_Anaerolineae_RBG-13-54-9_uncultured prokaryote	0.426001	0.426001	0	0.426001
Bacteria_Acidobacteria_Acidobacteriia_Solibacterales_Solibacteraceae (Subgroup 3)	0.111657	0.088464	0.0869918	0.00147218
Bacteria_Epsilonbacteraeota_Campylobacteria_Campylobacterales_Campylobacteraceae	0.017812	0.017812	0.017662	0.00015
Bacteria_Acidobacteria_Acidobacteriia_Subgroup 2_uncultured eubacterium WD264	0.276036	0.263395	0.0237607	0.239634
Archaea_Euryarchaeota_Thermoplasmata_Marine Benthic Group D and DHVEG-1_uncultured archaeon 20c-52	0.552075	0.557877	0.0281142	0.529763
Bacteria_Bacteroidetes_Bacteroidia_Flavobacteriales_Flavobacteriaceae	0.130874	0.0830125	0.154953	-0.07194
Bacteria_Proteobacteria_Deltaproteobacteria_Myxococcales_MSB-4B10	0.375411	0.335812	0.0625176	0.273294
Bacteria_Actinobacteria_Actinobacteria_Micrococcales_Dermatophilaceae	0.473981	0.474032	0.00148809	0.472544
Archaea_Euryarchaeota_Thermoplasmata_uncultured_uncultured eukaryote	0.442197	0.442197	0	0.442197
Bacteria_Proteobacteria_Alphaproteobacteria_Dongiales_Dongiaceae	0.158434	0.158434	0.158284	0.00015
Bacteria_Rokubacteria_NC10_Methylomirabilales_Methylomirabilaceae	0.31483	0.339539	0.0781361	0.261403
Bacteria_Proteobacteria_Deltaproteobacteria_Bdellovibrionales_Bdellovibrionaceae	0.576187	0.576187	0.0225175	0.55367
Bacteria_Acidobacteria_Acidobacteriia_Acidobacteriales_Acidobacteriaceae (Subgroup 1)	0.0697142	0.058256	0.0452238	0.0130322
Bacteria_Dependentiae_Babeliae_Babeliales_Vermiphilaceae	0.748698	0.700459	0.109319	0.59114
Bacteria_Proteobacteria_Deltaproteobacteria_Myxococcales_VHS-B3-70	0.411114	0.316355	0.150503	0.165852
Bacteria_Proteobacteria_Alphaproteobacteria_Rhodospirillales_Rhodopirillaceae	0.371561	0.371561	0.17865	0.192911
Bacteria_Proteobacteria_Gammaproteobacteria_Pseudomonadales_Pseudomonadaceae	0.0673473	0.015547	0.12437	-0.108823
Bacteria_Chloroflexi_Dehalococcoidia_661239_uncultured Chloroflexi bacterium	0.228106	0.172266	0.11168	0.0605856
Bacteria_Spirochaetes_Spirochaetia_Spirochaetales_Spirochaetaceae	0.335891	0.355508	0.0821417	0.273366
Bacteria_Chloroflexi_Anaerolineae_SBR1031_anaerobic bacterium MO-CFX2	0.510737	0.429061	0.166823	0.262238
Bacteria_Cyanobacteria_Oxyphotobacteria_Nostocales_Cyanobacteriaceae	0.208865	0.208865	0.092271	0.116594
Bacteria_Bacteroidetes_Bacteroidia_Bacteroidales_Prolixibacteraceae	0.13303	0.1046	0.0792687	0.0253318
Bacteria_Fibrobacteres_Fibrobacteria_Fibrobacterales_TG3	0.395391	0.395391	0	0.395391
Bacteria_Bacteroidetes_Bacteroidia_Bacteroidales_COB P4-1 termite group	0.363366	0.363366	0	0.363366
Bacteria_Proteobacteria_Alphaproteobacteria_Rhizobiales_Beijerinckiaceae	0.106093	0.0492175	0.114634	-0.0654166
Bacteria_Proteobacteria_Deltaproteobacteria_Desulfovibrionales_Desulfovibrionaceae	0.134494	0.101016	0.144615	-0.0435987
Bacteria_Cyanobacteria_Oxyphotobacteria_Chloroplast_Withania somnifera	0.020056	0.020056	0.004808	0.015248
Bacteria_Acidobacteria_Aminicenantia_Aminicenantales_Aminicenantes bacterium SCGC AAA252-F08	0.108766	0.111223	0.0742178	0.0370052
Bacteria_Planctomycetes_Phycisphaerae_MSBL9_GWC2-45-44	0.153284	0.153284	0.083064	0.07022
Bacteria_Bacteroidetes_Bacteroidia_Cytophagales_Cyclobacteriaceae	0.315982	0.350718	0.174635	0.176083
Archaea_Euryarchaeota_Methanomicrobia_Methanomicrobiales_Methanoregulaceae	0.157062	0.139533	0.0641758	0.0753572
Bacteria_Chlamydiae_Chlamydiae_Chlamydiales_Parachlamydiaceae	0.335596	0.335596	0.01423	0.321366
Bacteria_Verrucomicrobia_Verrucomicrobiae_Opitutales_Opitutaceae	0.189074	0.104323	0.145835	-0.0415121
Bacteria_Proteobacteria_Gammaproteobacteria_Alteromonadales_Shewanellaceae	0.005171	0.005171	0	0.005171
Bacteria_Verrucomicrobia_Verrucomicrobiae_Opitutales_Puniceicoccaceae	0.289179	0.179546	0.201726	-0.0221799
Bacteria_Chloroflexi_Dehalococcoidia_GIF9_uncultured Chloroflexi bacterium	0.34033	0.37718	0.0521142	0.325066
Bacteria_Chloroflexi_Dehalococcoidia_MSBL5_uncultured Dehalococcoides sp.	0.375739	0.348548	0.157004	0.191544
Bacteria_Planctomycetes_Phycisphaerae_MSBL9_4572-13	0.0976307	0.086515	0.04352	0.042995
Bacteria_Actinobacteria_Actinobacteria_Streptomycetales_Streptomycetaceae	0.158244	0.19895	0.144395	0.0545547
Bacteria_Proteobacteria_Deltaproteobacteria_Myxococcales_Haliangiaceae	0.20657	0.239321	0.0843522	0.154969
Bacteria_Chloroflexi_Dehalococcoidia_Sh765B-AG-111_uncultured Dehalococcoides sp.	0.152281	0.130825	0.0628562	0.0679693
Bacteria_Bacteroidetes_Bacteroidia_Bacteroidales_Porphyromonadaceae	0.024032	0.021635	0.01647	0.00516496
Bacteria_Firmicutes_Bacilli_Bacillales_Family XI	0.008889	0.008889	0	0.008889
Bacteria_Verrucomicrobia_Verrucomicrobiae_Verrucomicrobiales_Akkermansiaceae	0.00015	0.00015	0	0.00015
Bacteria_Proteobacteria_Alphaproteobacteria_Rhodospirillales_Magnetospirillaceae	0.162404	0.168899	0.0206589	0.14824
Bacteria_Proteobacteria_Gammaproteobacteria_Cellvibrionales_Microbulbiferaceae	0.028179	0.022483	0.0214897	0.000993298
Bacteria_Gemmatimonadetes_Gemmatimonadetes_Gemmatimonadales_Gemmatimonadaceae	0.393882	0.287467	0.301181	-0.0137139
Bacteria_Proteobacteria_Deltaproteobacteria_Myxococcales_Nannocystaceae	0.125921	0.125426	0.0823163	0.0431102
Bacteria_Planctomycetes_Planctomycetacia_Planctomycetales_uncultured	0.597396	0.60023	0.00957926	0.590651
Bacteria_Planctomycetes_Phycisphaerae_mle1-8_uncultured Planctomycetales bacterium	0.522654	0.522654	0	0.522654
Bacteria_Chloroflexi_Dehalococcoidia_FS117-23B-02_uncultured prokaryote	0.442212	0.266629	0.248312	0.0183171
Bacteria_Proteobacteria_Gammaproteobacteria_JG36-TzT-191_uncultured proteobacterium	0.244575	0.244575	0	0.244575
Bacteria_Planctomycetes_Phycisphaerae_S-70_groundwater metagenome	0.203187	0.203187	0	0.203187
Bacteria_Nitrospirae_Thermodesulfovibrionia_uncultured_saltmarsh clone LCP-6	0.215845	0.292361	0.108829	0.183532
Bacteria_Chloroflexi_Anaerolineae_RBG-13-54-9_hot springs metagenome	0.351342	0.401379	0.0622718	0.339107
Bacteria_Chloroflexi_Dehalococcoidia_t0.6.f_uncultured eubacterium t0.6.f	0.247101	0.265453	0.112566	0.152887
Bacteria_Proteobacteria_Gammaproteobacteria_Ectothiorhodospirales_Thioalkalispiraceae	0.152072	0.151807	0.00507821	0.146729
Bacteria_Chloroflexi_Ktedonobacteria_Ktedonobacterales_JG30-KF-AS9	0.524711	0.524711	0	0.524711
Bacteria_Proteobacteria_Gammaproteobacteria_Chromatiales_Chromatiaceae	0.182647	0.195028	0.079743	0.115285
Bacteria_Actinobacteria_Actinobacteria_Pseudonocardiales_Pseudonocardiaceae	0.0715027	0.084525	0.0497109	0.0348141
Bacteria_Proteobacteria_Deltaproteobacteria_Myxococcales_Polyangiaceae	0.091831	0.087918	0.0129705	0.0749475
Bacteria_Actinobacteria_Actinobacteria_Propionibacteriales_Propionibacteriaceae	0.129759	0.0980925	0.137173	-0.0390803
Archaea_Euryarchaeota_Thermoplasmata_Marine Group III_uncultured Thermoplasmatales archaeon	0.825214	0.927005	0.178118	0.748887
Bacteria_Acidobacteria_Acidobacteriia_Acidobacteriales_uncultured	0.225668	0.228643	0.0144547	0.214188
Bacteria_Proteobacteria_Gammaproteobacteria_Xanthomonadales_Xanthomonadaceae	0.0351535	0.0108515	0.0387151	-0.0278636
Bacteria_Actinobacteria_Actinobacteria_Micrococcales_Microbacteriaceae	0.025856	0.00015	0.0316803	-0.0315303
Bacteria_Actinobacteria_Actinobacteria_Micrococcales_Intrasporangiaceae	0.068075	0.068075	0	0.068075
Bacteria_Fusobacteria_Fusobacteriia_Fusobacteriales_Leptotrichiaceae	0.010242	0.010242	0	0.010242
Bacteria_Proteobacteria_Alphaproteobacteria_Elsterales_uncultured	0.219777	0.316718	0.119543	0.197175
Bacteria_Firmicutes_Negativicutes_Selenomonadales_Veillonellaceae	0.0724752	0.0373945	0.0883185	-0.050924
Bacteria_Elusimicrobia_Elusimicrobia_Lineage IV_uncultured soil bacterium	0.248623	0.248623	0	0.248623
Archaea_Euryarchaeota_Thermoplasmata_Methanomassiliicoccales_Methanomassiliicoccaceae	0.111051	0.116787	0.0165574	0.10023
Bacteria_Actinobacteria_Actinobacteria_PeM15_actinobacterium GP-6	0.350542	0.350542	0	0.350542
Bacteria_Proteobacteria_Alphaproteobacteria_Caulobacterales_Hyphomonadaceae	0.0706593	0.083545	0.0531371	0.0304079
Bacteria_Proteobacteria_Alphaproteobacteria_Rhizobiales_Rhizobiaceae	0.0437945	0.021226	0.0595561	-0.0383301
Bacteria_Actinobacteria_Coriobacteriia_FS118-23B-02_marine sediment metagenome	0.792818	0.792818	0	0.792818
Bacteria_Proteobacteria_Deltaproteobacteria_Myxococcales_bacteriap25	0.342369	0.078652	0.3749	-0.296248
Bacteria_Nitrospirae_Thermodesulfovibrionia_uncultured_uncultured Acidobacteria bacterium	0.206147	0.199106	0.0975456	0.10156
Bacteria_Proteobacteria_Deltaproteobacteria_10bav-F6_uncultured delta proteobacterium	0.262564	0.262564	0.0046465	0.257917
Bacteria_Epsilonbacteraeota_Campylobacteria_Campylobacterales_Sulfurovaceae	0.0950243	0.102078	0.0467637	0.0553143
Bacteria_Proteobacteria_Deltaproteobacteria_Syntrophobacterales_Syntrophobacteraceae	0.0649054	0.06931	0.0200052	0.0493048
Bacteria_Proteobacteria_Deltaproteobacteria_Myxococcales_BIrii41	0.154505	0.154505	0	0.154505
Bacteria_Chloroflexi_Anaerolineae_KZNMV-5-B42_uncultured organism	0.805522	0.805522	0.009688	0.795834
Bacteria_Actinobacteria_Actinobacteria_Corynebacteriales_Nocardiaceae	0.160496	0.160496	0.160394	0.000102
Bacteria_Chloroflexi_Anaerolineae_RBG-13-54-9_uncultured bacterium SJA-35	0.426001	0.426001	0	0.426001
Archaea_Thaumarchaeota_Nitrososphaeria_Nitrososphaerales_Nitrososphaeraceae	0.157626	0.067478	0.135294	-0.0678161
Bacteria_Cyanobacteria_Oxyphotobacteria_Synechococcales_Cyanobiaceae	0.13029	0.13029	0	0.13029
Bacteria_Cyanobacteria_Melainabacteria_Gastranaerophilales_uncultured Merismopedia sp.	0.254156	0.254156	0	0.254156
Bacteria_Proteobacteria_Deltaproteobacteria_Sva0485_uncultured Desulfobacteraceae bacterium	0.348291	0.348291	0.0017145	0.346576
Bacteria_Chloroflexi_Anaerolineae_SBR1031_uncultured planctomycete	0.259538	0.259538	0	0.259538
Bacteria_Actinobacteria_Thermoleophilia_Solirubrobacterales_Solirubrobacteraceae	0.119219	0.119219	0.0197415	0.099477
Bacteria_Proteobacteria_Gammaproteobacteria_JG36-TzT-191_metagenome	0.26663	0.26663	0	0.26663
Bacteria_Proteobacteria_Alphaproteobacteria_Reyranellales_Reyranellaceae	0.082447	0.098708	0.0340366	0.0646714
Bacteria_Modulibacteria_Moduliflexia_Moduliflexales_Moduliflexaceae	0.613782	0.613782	0	0.613782
Archaea_Crenarchaeota_Crenarchaeota Incertae Sedis_Aigarchaeales_Geothermarchaeaceae	0.828713	0.828713	0	0.828713
Bacteria_Proteobacteria_Gammaproteobacteria_Diplorickettsiales_Diplorickettsiaceae	0.51146	0.660264	0.218952	0.441312
Archaea_Euryarchaeota_Methanomicrobia_Methanocellales_Methanocellaceae	0.101582	0.132243	0.0534757	0.0787673
Bacteria_Proteobacteria_Deltaproteobacteria_Sva0485_uncultured sediment bacterium	0.298807	0.286994	0.153511	0.133483
Bacteria_Proteobacteria_Deltaproteobacteria_Sva0485_uncultured soil bacterium	0.189038	0.166048	0.0494689	0.116579
Bacteria_Chloroflexi_Anaerolineae_SBR1031_A4b	0.451874	0.426001	0.180762	0.245239
Bacteria_Planctomycetes_Phycisphaerae_Phycisphaerales_AKAU3564 sediment group	0.454337	0.354451	0.14126	0.213191
Archaea_Euryarchaeota_Methanomicrobia_Methanosarcinales_Methanosarcinaceae	0.0928785	0.0862	0.0394746	0.0467254
Bacteria_Epsilonbacteraeota_Campylobacteria_Campylobacterales_Helicobacteraceae	0.0143145	0.0143145	0.0141635	0.000151
Bacteria_Actinobacteria_Acidimicrobiia_Microtrichales_Microtrichaceae	0.242528	0.267216	0.135947	0.131269
Archaea_Thaumarchaeota_Nitrososphaeria_Nitrosotaleales_Nitrosotaleaceae	0.35417	0.35417	0	0.35417
Bacteria_Proteobacteria_Gammaproteobacteria_Betaproteobacteriales_Neisseriaceae	0.0278107	0.029424	0.0179502	0.0114738
Bacteria_Actinobacteria_Actinobacteria_Micromonosporales_Micromonosporaceae	0.067497	0.067497	0	0.067497
Bacteria_Chloroflexi_Dehalococcoidia_ER-E4-17_uncultured bacterium	0.117411	0.117411	0.006038	0.111373
Bacteria_Proteobacteria_Alphaproteobacteria_uncultured_uncultured Rhodobacteraceae bacterium	0.396663	0.396663	0	0.396663
Bacteria_Hydrogenedentes_Hydrogenedentia_Hydrogenedentiales_Hydrogenedensaceae	0.157502	0.157502	0	0.157502
Archaea_Euryarchaeota_Thermoplasmata_SG8-5_Euryarchaeota archaeon SG8-5	0.508278	0.507313	0.00942852	0.497884
Bacteria_Acidobacteria_Aminicenantia_Aminicenantales_uncultured prokaryote	0.205697	0.205697	0	0.205697
Bacteria_Proteobacteria_Gammaproteobacteria_Betaproteobacteriales_Nitrosomonadaceae	0.148326	0.114454	0.0951672	0.0192868
Bacteria_Proteobacteria_Gammaproteobacteria_Pasteurellales_Pasteurellaceae	0.0767192	0.0742095	0.0143367	0.0598728
Bacteria_Firmicutes_Clostridia_Clostridiales_Peptococcaceae	0.33959	0.33959	0.155664	0.183926
Bacteria_Bacteroidetes_Bacteroidia_Chitinophagales_Chitinophagaceae	0.112586	0.109577	0.0260973	0.0834797
Archaea_Euryarchaeota_Thermococci_Methanofastidiosales_uncultured	0.534788	0.45523	0.255019	0.200211
Bacteria_Chloroflexi_Dehalococcoidia_FW22_uncultured Dehalogenimonas sp.	0.37718	0.37718	0	0.37718
Bacteria_Proteobacteria_Deltaproteobacteria_Bdellovibrionales_Bacteriovoracaceae	0.190127	0.190498	0.0954096	0.0950889
Bacteria_Tenericutes_Mollicutes_Mollicutes RF39_unidentified	0.521589	0.521589	0	0.521589
Bacteria_Chloroflexi_Dehalococcoidia_GIF3_uncultured Chlorobi bacterium	0.143988	0.119482	0.0704641	0.0490179
Bacteria_Actinobacteria_Actinobacteria_Corynebacteriales_Corynebacteriaceae	0.0404692	0.026552	0.0318032	-0.00525124
Bacteria_Proteobacteria_Deltaproteobacteria_Myxococcales_Eel-36e1D6	0.03923	0.03923	0	0.03923
Archaea_Euryarchaeota_Methanomicrobia_Methanosarcinales_ANME-2a-2b	0.252729	0.244826	0.0409923	0.203834
Bacteria_Cyanobacteria_Oxyphotobacteria_Nostocales_Microcystaceae	0.00015	0.00015	0	0.00015
Bacteria_Chloroflexi_Anaerolineae_MSB-5E12_Chloroflexi bacterium JGI 0000059-C09	0.404195	0.426001	0.0436128	0.382388
Bacteria_Nitrospirae_Thermodesulfovibrionia_uncultured_uncultured Nitrospira sp.	0.325753	0.325753	0	0.325753
Bacteria_Bacteroidetes_Bacteroidia_Bacteroidales_Marinifilaceae	0.152921	0.219114	0.0936115	0.125502
Bacteria_Proteobacteria_Alphaproteobacteria_Rhizobiales_Rhodomicrobiaceae	0.0253125	0.0253125	0.0046095	0.020703
Bacteria_Proteobacteria_Alphaproteobacteria_Micropepsales_Micropepsaceae	0.230242	0.238733	0.043248	0.195485
Bacteria_Proteobacteria_Deltaproteobacteria_Desulfuromonadales_Geobacteraceae	0.0624415	0.046292	0.0438544	0.00243763
Bacteria_Fibrobacteres_Chitinivibrionia_uncultured_uncultured Caldithrix sp.	0.472276	0.472276	0	0.472276
Archaea_Euryarchaeota_Methanomicrobia_Methanomicrobiales_uncultured	0.175486	0.175486	0	0.175486
Archaea_Euryarchaeota_Thermoplasmata_Marine Benthic Group D and DHVEG-1_uncultured eukaryote	0.557877	0.557877	0	0.557877
Archaea_Euryarchaeota_Thermoplasmata_uncultured_uncultured sediment archaeon	0.595506	0.595506	0.037629	0.557877
Bacteria_Proteobacteria_Alphaproteobacteria_Rhizobiales_Stappiaceae	0.0464572	0.0444595	0.0123339	0.0321256
Bacteria_Kiritimatiellaeota_Kiritimatiellae_Kiritimatiellales_Kiritimatiellaceae	0.091135	0.091135	0.001548	0.089587
Bacteria_Chloroflexi_Dehalococcoidia_S085_marine sediment metagenome	0.15484	0.15484	0.111789	0.043051
Bacteria_Bacteroidetes_Bacteroidia_Sphingobacteriales_ST-12K33	0.363366	0.363366	0	0.363366
Bacteria_Proteobacteria_Deltaproteobacteria_MBNT15_uncultured Sorangiineae bacterium	0.450187	0.450187	0	0.450187
Bacteria_Firmicutes_Bacilli_Lactobacillales_Carnobacteriaceae	0.106542	0.074082	0.0987693	-0.0246873
Bacteria_Proteobacteria_Deltaproteobacteria_Oligoflexales_Oligoflexaceae	0.270172	0.270172	0.224778	0.045394
Bacteria_Chloroflexi_Dehalococcoidia_Dehalococcoidales_uncultured	0.402156	0.365161	0.105387	0.259774
Bacteria_Proteobacteria_Deltaproteobacteria_Myxococcales_Archangiaceae	0.0955103	0.120099	0.0661206	0.0539784
Bacteria_Proteobacteria_Alphaproteobacteria_Rhizobiales_Rhizobiales Incertae Sedis	0.212575	0.222913	0.0449686	0.177944
Bacteria_Bacteroidetes_Bacteroidia_Bacteroidales_Bacteroidetes vadinHA17	0.391088	0.383856	0.0600641	0.323792
Bacteria_Bacteroidetes_Bacteroidia_Sphingobacteriales_Sphingobacteriaceae	0.0189192	0.016488	0.0155373	0.000950742
Bacteria_Actinobacteria_Coriobacteriia_Coriobacteriales_Atopobiaceae	0.118255	0.118255	0.0081445	0.110111
Bacteria_Proteobacteria_Gammaproteobacteria_Betaproteobacteriales_Rhodocyclaceae	0.105284	0.073777	0.0650257	0.00875127
Bacteria_Bacteroidetes_Bacteroidia_Cytophagales_Spirosomaceae	0.010946	0.010946	0	0.010946
Bacteria_Chlamydiae_Chlamydiae_Chlamydiales_Simkaniaceae	0.166701	0.166701	0.0004135	0.166287
Bacteria_Proteobacteria_Deltaproteobacteria_Desulfuromonadales_Desulfuromonadaceae	0.0734288	0.032631	0.0773784	-0.0447474
Bacteria_Bacteroidetes_Bacteroidia_Bacteroidales_Bacteroidetes BD2-2	0.227393	0.227393	0.0420905	0.185303
Bacteria_Firmicutes_Clostridia_Clostridiales_Family XI	0.103085	0.024606	0.128667	-0.104061
Bacteria_Acidobacteria_Aminicenantia_Aminicenantales_uncultured soil bacterium	0.0907703	0.0736575	0.0577974	0.0158601
Bacteria_Actinobacteria_Thermoleophilia_Solirubrobacterales_67-14	0.449577	0.449577	0.0086335	0.440944
Bacteria_Proteobacteria_Alphaproteobacteria_Thalassobaculales_uncultured	0.316718	0.316718	0	0.316718
Bacteria_Bacteroidetes_Bacteroidia_Flavobacteriales_Cryomorphaceae	0.14307	0.14307	0.079741	0.063329
Bacteria_Verrucomicrobia_Verrucomicrobiae_Chthoniobacterales_Chthoniobacteraceae	0.198267	0.16329	0.0916532	0.0716368
Bacteria_Acidobacteria_Holophagae_Holophagales_Holophagaceae	0.046912	0.046912	0	0.046912
Bacteria_Acidobacteria_Blastocatellia (Subgroup 4)_Blastocatellales_Blastocatellaceae	0.257172	0.354661	0.143231	0.21143
Bacteria_Planctomycetes_Brocadiae_SM23-32_uncultured bacterium	0.450355	0.450355	0	0.450355
Bacteria_Proteobacteria_Deltaproteobacteria_MBNT15_Deltaproteobacteria bacterium CSP1-8	0.274065	0.274065	0.027501	0.246564
Bacteria_Chloroflexi_Anaerolineae_Thermoflexales_Thermoflexaceae	0.266448	0.266448	0	0.266448
Bacteria_Planctomycetes_Planctomycetacia_Isosphaerales_Isosphaeraceae	0.489415	0.424111	0.198129	0.225982
Archaea_Nanoarchaeaeota_Nanohaloarchaeia_Aenigmarchaeales_Candidatus Aenigmarchaeum subterraneum SCGC AAA011-O16	0.261555	0.261555	0	0.261555
Bacteria_Bacteroidetes_Bacteroidia_Sphingobacteriales_CWT CU03-E12	0.514814	0.514814	0.192796	0.322018
Bacteria_Dependentiae_Babeliae_Babeliales_Babeliaceae	2.00326	2.02067	0.609682	1.41099
Bacteria_Bacteroidetes_Bacteroidia_Bacteroidales_Barnesiellaceae	0.0519745	0.036747	0.0561207	-0.0193737
Bacteria_Proteobacteria_Gammaproteobacteria_Oceanospirillales_Saccharospirillaceae	0.11365	0.106166	0.0757741	0.0303919
Bacteria_Chloroflexi_Dehalococcoidia_Sh765B-AG-111_uncultured Chlorobi bacterium	0.273296	0.273296	0.0064825	0.266814
Archaea_Euryarchaeota_Methanomicrobia_Methanomicrobiales_Rice Cluster II	0.037752	0.037752	0	0.037752
Bacteria_Chloroflexi_Anaerolineae_SBR1031_uncultured Anaerolineaceae bacterium	0.266629	0.266629	0	0.266629
Bacteria_Verrucomicrobia_Verrucomicrobiae_S-BQ2-57 soil group_metagenome	0.249783	0.249783	0	0.249783
Bacteria_Proteobacteria_Deltaproteobacteria_Sva0485_bioreactor metagenome	0.0154334	0.015481	0.00744915	0.00803185
Bacteria_Proteobacteria_Gammaproteobacteria_Salinisphaerales_Solimonadaceae	0.150687	0.150687	0	0.150687
Bacteria_Acidobacteria_Holophagae_Acanthopleuribacterales_Acanthopleuribacteraceae	0.463274	0.463274	0.143132	0.320142
Bacteria_Deferribacteres_Deferribacteres_Deferribacterales_Deferribacteraceae	0.0049095	0.0049095	0.0047595	0.00015
Bacteria_Proteobacteria_Alphaproteobacteria_Acetobacterales_Acetobacteraceae	0.136995	0.136319	0.0655136	0.0708049
Bacteria_Chloroflexi_Dehalococcoidia_FW22_uncultured organism	0.349184	0.412062	0.126832	0.28523
Bacteria_Proteobacteria_Gammaproteobacteria_Legionellales_Legionellaceae	0.23745	0.174527	0.135862	0.0386646
Bacteria_Proteobacteria_Gammaproteobacteria_TDNP-Wbc97-11-7-16_uncultured bacterium	0.077233	0.077233	0	0.077233
Bacteria_Proteobacteria_Deltaproteobacteria_TX1A-33_uncultured bacterium	0.466815	0.466815	0	0.466815
Bacteria_Chloroflexi_Anaerolineae_SBR1031_bacterium YC-ZSS-LKJ145	0.803272	0.790261	0.0358586	0.754402
Bacteria_Proteobacteria_Deltaproteobacteria_Desulfuromonadales_Sva1033	0.110515	0.110515	0	0.110515
Bacteria_Proteobacteria_Deltaproteobacteria_Sva0485_uncultured Desulfuromonadales bacterium	0.487817	0.385255	0.210257	0.174998
Bacteria_Planctomycetes_Planctomycetacia_Planctomycetales_Gimesiaceae	0.504618	0.504618	0.075999	0.428619
Bacteria_Proteobacteria_Alphaproteobacteria_Rhodovibrionales_Kiloniellaceae	0.258885	0.258885	0.0596145	0.199271
Bacteria_Planctomycetes_Phycisphaerae_MSBL9_SM23-30	0.031913	0.031913	0	0.031913
Bacteria_Nitrospirae_Thermodesulfovibrionia_uncultured_uncultured prokaryote	0.360435	0.357208	0.0349811	0.322226
Bacteria_Firmicutes_Bacilli_Lactobacillales_Leuconostocaceae	0.000101	0.000101	0	0.000101
Bacteria_Chloroflexi_Dehalococcoidia_GIF3_uncultured Chloroflexaceae bacterium	0.194924	0.194924	0	0.194924
Bacteria_Proteobacteria_Alphaproteobacteria_Rhizobiales_A0839	0.438323	0.438323	0.167133	0.27119
Bacteria_Cyanobacteria_Oxyphotobacteria_Nostocales_Coleofasciculaceae	0.010078	0.010078	0	0.010078
Bacteria_Proteobacteria_Gammaproteobacteria_Aeromonadales_Aeromonadaceae	0.005086	0.005086	0	0.005086
Bacteria_Proteobacteria_Deltaproteobacteria_Sva0485_uncultured proteobacterium	0.321447	0.302457	0.0268559	0.275601
Bacteria_Firmicutes_Bacilli_Bacillales_Staphylococcaceae	0.000127	0.000127	2.3e-05	0.000104
Bacteria_Proteobacteria_Gammaproteobacteria_Betaproteobacteriales_SC-I-84	0.23904	0.23904	0.0359435	0.203097
Bacteria_Firmicutes_Clostridia_Clostridiales_Christensenellaceae	0.41897	0.431472	0.0309592	0.400513
Bacteria_Chloroflexi_Anaerolineae_ADurb.Bin180_Chloroflexi bacterium ADurb.Bin180	0.334799	0.334799	0	0.334799
Bacteria_Chloroflexi_Anaerolineae_Caldilineales_Caldilineaceae	0.263309	0.278253	0.115372	0.162881
Bacteria_Actinobacteria_Actinobacteria_Propionibacteriales_Nocardioidaceae	0.0656463	0.010796	0.0814836	-0.0706876
Bacteria_Verrucomicrobia_Verrucomicrobiae_Verrucomicrobiales_Rubritaleaceae	0.39947	0.389666	0.0477556	0.34191
Bacteria_Proteobacteria_Gammaproteobacteria_Alteromonadales_Alteromonadaceae	0.0692643	0.054122	0.0487827	0.00533926
Bacteria_Chloroflexi_Dehalococcoidia_GIF9_uncultured soil bacterium	0.333391	0.281129	0.155044	0.126085
Bacteria_Bacteroidetes_Ignavibacteria_OPB56_uncultured Chlorobiales bacterium	0.40331	0.40331	0.040751	0.362559
Bacteria_Actinobacteria_Actinobacteria_Streptosporangiales_Thermomonosporaceae	0.198506	0.198506	0	0.198506
Bacteria_Epsilonbacteraeota_Campylobacteria_Campylobacterales_Arcobacteraceae	0.36155	0.050398	0.613537	-0.563139
Bacteria_Proteobacteria_Gammaproteobacteria_WD260_uncultured eubacterium WD260	0.155925	0.155925	0.074711	0.081214
Bacteria_Actinobacteria_Acidimicrobiia_Microtrichales_uncultured	0.262671	0.199246	0.115572	0.0836737
Bacteria_Fusobacteria_Fusobacteriia_Fusobacteriales_Fusobacteriaceae	0.0175117	0.015729	0.00252178	0.0132072
Bacteria_Bacteroidetes_Bacteroidia_Cytophagales_Flammeovirgaceae	0.735804	0.735804	0	0.735804
Bacteria_Tenericutes_Mollicutes_Mycoplasmatales_Mycoplasmataceae	0.642231	0.622987	0.216887	0.4061
Bacteria_Firmicutes_Clostridia_Clostridiales_Family XII	0.216556	0.216556	0	0.216556
Bacteria_Planctomycetes_Phycisphaerae_B103G10_uncultured bacterium	0.483592	0.483592	0	0.483592
Bacteria_Firmicutes_Clostridia_Clostridiales_Heliobacteriaceae	0.741866	0.741866	0	0.741866
Bacteria_Actinobacteria_Coriobacteriia_OPB41_iron-reducing bacterium enrichment culture clone HN-HFO4	0.33407	0.33407	0	0.33407
Bacteria_Proteobacteria_Deltaproteobacteria_Bradymonadales_Bradymonadaceae	0.595554	0.595554	1.9e-05	0.595535
Bacteria_Bacteroidetes_Ignavibacteria_SJA-28_uncultured Bacteroidetes bacterium	0.057064	0.057064	0	0.057064
Bacteria_Proteobacteria_Gammaproteobacteria_Alteromonadales_Pseudoalteromonadaceae	0.037068	0.043427	0.0273166	0.0161104
Bacteria_Firmicutes_Clostridia_Clostridiales_Gracilibacteraceae	0.483661	0.483661	0	0.483661
Bacteria_Proteobacteria_Gammaproteobacteria_Halothiobacillales_Halothiobacillaceae	0.0976215	0.0976215	0.0301045	0.067517
Bacteria_Proteobacteria_Gammaproteobacteria_Oceanospirillales_Endozoicomonadaceae	0.136271	0.136271	0	0.136271
Bacteria_Proteobacteria_Gammaproteobacteria_Thiomicrospirales_Thiomicrospiraceae	0.0899982	0.074016	0.0505482	0.0234678
Bacteria_Chloroflexi_Anaerolineae_MSB-5B2_uncultured organism	0.868737	0.868737	0	0.868737
Bacteria_Patescibacteria_ABY1_Candidatus Falkowbacteria_marine metagenome	1.58835	1.58835	0	1.58835
Bacteria_Thermotogae_Thermotogae_Thermotogales_Fervidobacteriaceae	0.126871	0.126871	0	0.126871
Bacteria_Firmicutes_Clostridia_Thermoanaerobacterales_Family III	0.000101	0.000101	0	0.000101
Bacteria_Chlamydiae_Chlamydiae_Chlamydiales_Criblamydiaceae	0.297845	0.297845	0.0245195	0.273326
Bacteria_Cyanobacteria_Melainabacteria_Obscuribacterales_uncultured Clostridia bacterium	0.344691	0.344691	0.0059905	0.3387
Archaea_Crenarchaeota_Verstraetearchaeia_Methanomethyliales_Methanomethyliaceae	0.047109	0.047109	0	0.047109
Bacteria_Acidobacteria_Holophagae_Subgroup 7_uncultured microorganism	0.37014	0.37014	0	0.37014
Bacteria_Chloroflexi_Dehalococcoidia_GIF9_AB-539-J10	0.05075	0.05075	0.001367	0.049383
Bacteria_Actinobacteria_Actinobacteria_Frankiales_Acidothermaceae	0.141698	0.141698	0.0144085	0.127289
Bacteria_Proteobacteria_Gammaproteobacteria_Cardiobacteriales_Wohlfahrtiimonadaceae	0.010378	0.010378	0	0.010378
Bacteria_Proteobacteria_Deltaproteobacteria_NB1-j_uncultured marine bacterium	0.419732	0.419732	0	0.419732
Bacteria_Chloroflexi_Dehalococcoidia_Dehalococcoidales_Dehalococcoidales Incertae Sedis	0.333753	0.365161	0.0444181	0.320743
Bacteria_Armatimonadetes_Chthonomonadetes_Chthonomonadales_uncultured bacterium SJA-22	0.507993	0.507993	0	0.507993
Bacteria_Proteobacteria_Zetaproteobacteria_Mariprofundales_Mariprofundaceae	0.025798	0.025798	0	0.025798
Bacteria_Actinobacteria_Coriobacteriia_Coriobacteriales_Eggerthellaceae	0.008044	0.008044	0.007894	0.00015
Bacteria_Planctomycetes_Phycisphaerae_CCM11a_uncultured deep-sea bacterium	0.362715	0.362715	0	0.362715
Bacteria_Nitrospinae_Nitrospinia_Nitrospinales_Nitrospinaceae	0.231826	0.231826	0	0.231826
Archaea_Euryarchaeota_Thermoplasmata_JdFR-43_Thermoplasmatales archaeon JdFR-43	0.557877	0.557877	0	0.557877
Bacteria_Verrucomicrobia_Verrucomicrobiae_LD1-PB3_uncultured soil bacterium	0.660062	0.660062	0	0.660062
Bacteria_Proteobacteria_Gammaproteobacteria_Betaproteobacteriales_Gallionellaceae	0.175934	0.175934	0	0.175934
Bacteria_Bacteroidetes_Bacteroidia_Cytophagales_Microscillaceae	0.1504	0.1504	0	0.1504
Bacteria_Verrucomicrobia_Verrucomicrobiae_Chthoniobacterales_Terrimicrobiaceae	0.185085	0.185085	0	0.185085
Bacteria_Deinococcus-Thermus_Deinococci_Deinococcales_Trueperaceae	0.123139	0.123139	0	0.123139
Bacteria_Proteobacteria_Deltaproteobacteria_Myxococcales_mle1-27	0.104112	0.104112	0	0.104112
Bacteria_Cyanobacteria_Oxyphotobacteria_Nostocales_Xenococcaceae	0.135731	0.135731	0	0.135731
Bacteria_Planctomycetes_Phycisphaerae_Tepidisphaerales_Tepidisphaeraceae	0.511673	0.511673	0	0.511673
Bacteria_Planctomycetes_Phycisphaerae_MSBL9_L21-RPul-D3	0.69094	0.69094	0	0.69094
Bacteria_Proteobacteria_Deltaproteobacteria_NB1-j_uncultured organism	0.368146	0.368146	0	0.368146
Bacteria_Proteobacteria_Gammaproteobacteria_Oceanospirillales_SS1-B-06-26	0.203621	0.203621	0	0.203621
Bacteria_Actinobacteria_Actinobacteria_Micrococcales_Cellulomonadaceae	0.000101	0.000101	0	0.000101
Bacteria_Dadabacteria_Dadabacteriia_Dadabacteriales_uncultured candidate division SBR1093 bacterium	1.03937	1.03937	0	1.03937
Bacteria_Proteobacteria_Deltaproteobacteria_NB1-j_uncultured prokaryote	0.497038	0.497038	0.0394495	0.457589
Bacteria_Proteobacteria_Deltaproteobacteria_MBNT15_delta proteobacterium enrichment culture clone AP-FeEnrich11	0.257298	0.257298	0	0.257298
Archaea_Euryarchaeota_Thermoplasmata_uncultured_uncultured archaeon 20c-39	1.05301	1.05301	0.191181	0.861832
Bacteria_Bacteroidetes_Ignavibacteria_Ignavibacteriales_LD-RB-34	0.009928	0.009928	0	0.009928
Bacteria_Chloroflexi_Anaerolineae_RBG-13-54-9_uncultured Caldilineae bacterium	0.338814	0.338814	0	0.338814
Bacteria_Fibrobacteres_Fibrobacteria_Fibrobacterales_possible family 01	0.144649	0.108626	0.0695018	0.0391242
Bacteria_Bacteroidetes_Ignavibacteria_OPB56_uncultured prokaryote	0.12629	0.12629	0	0.12629
Bacteria_Proteobacteria_Alphaproteobacteria_Puniceispirillales_SAR116 clade	0.01015	0.01015	0	0.01015
Bacteria_Firmicutes_Clostridia_Clostridiales_Syntrophomonadaceae	0.105181	0.105181	0	0.105181
Bacteria_Spirochaetes_Spirochaetia_Brevinematales_Brevinemataceae	0.170657	0.170657	0	0.170657
Bacteria_Chloroflexi_Dehalococcoidia_GIF3_uncultured organism	0.285336	0.285336	0	0.285336
Bacteria_Proteobacteria_Alphaproteobacteria_SAR11 clade_Clade I	0.0049	0.0049	0	0.0049
Bacteria_Bacteroidetes_Bacteroidia_Flavobacteriales_Crocinitomicaceae	0.182034	0.182034	0	0.182034
Bacteria_Firmicutes_Clostridia_Clostridiales_Clostridiales vadinBB60 group	0.462462	0.462462	0	0.462462
Bacteria_Firmicutes_Bacilli_Lactobacillales_Aerococcaceae	0.000152	0.000152	0	0.000152
Bacteria_Armatimonadetes_Fimbriimonadia_Fimbriimonadales_Fimbriimonadaceae	0.101248	0.101248	0	0.101248
Bacteria_Proteobacteria_Alphaproteobacteria_Rhodospirillales_AEGEAN-169 marine group	0.009242	0.009242	0	0.009242
Bacteria_Firmicutes_Clostridia_Clostridiales_Eubacteriaceae	0.480745	0.480745	0	0.480745
Bacteria_Proteobacteria_Deltaproteobacteria_RCP2-54_uncultured Syntrophobacterales bacterium	0.209784	0.209784	0	0.209784
Bacteria_Proteobacteria_Gammaproteobacteria_Betaproteobacteriales_TRA3-20	0.221729	0.230108	0.0128043	0.217304
Bacteria_Proteobacteria_Alphaproteobacteria_Rhizobiales_Devosiaceae	0.107687	0.107687	0	0.107687
Bacteria_Dependentiae_Babeliae_Babeliales_uncultured soil bacterium	1.64266	1.64266	0	1.64266
Bacteria_Actinobacteria_Coriobacteriia_OPB41_permafrost metagenome	0.282811	0.282811	0	0.282811
Bacteria_Chloroflexi_Ktedonobacteria_Ktedonobacterales_Ktedonobacteraceae	0.778868	0.778868	0	0.778868
Bacteria_Planctomycetes_Phycisphaerae_CCM11a_uncultured organism	0.559697	0.559697	0	0.559697
Bacteria_Acidobacteria_Aminicenantia_Aminicenantales_metagenome	0.205697	0.205697	0	0.205697
Bacteria_Proteobacteria_Gammaproteobacteria_Thiotrichales_Thiotrichaceae	0.115936	0.115936	0	0.115936
Bacteria_Elusimicrobia_Endomicrobia_Endomicrobiales_Endomicrobiaceae	0.146453	0.146453	0	0.146453
Archaea_Euryarchaeota_Thermoplasmata_uncultured_uncultured Thermoplasmata archaeon	0.557877	0.557877	0	0.557877
Bacteria_Proteobacteria_Alphaproteobacteria_Azospirillales_Azospirillaceae	0.015348	0.015348	0	0.015348
Bacteria_Bacteroidetes_Bacteroidia_Bacteroidales_Marinilabiliaceae	0.241388	0.241388	0	0.241388
Bacteria_Proteobacteria_Gammaproteobacteria_Oceanospirillales_Pseudohongiellaceae	0.04599	0.04599	0	0.04599
Bacteria_Actinobacteria_Coriobacteriia_OPB41_Coriobacteriaceae bacterium EMTCatB1	0.355368	0.355368	0	0.355368
Bacteria_Proteobacteria_Deltaproteobacteria_Myxococcales_P3OB-42	0.088323	0.088323	0	0.088323
Bacteria_Actinobacteria_Acidimicrobiia_IMCC26256_uncultured Cellulomonadaceae bacterium	0.268995	0.268995	0	0.268995
Bacteria_Planctomycetes_Phycisphaerae_MSBL9_uncultured bacterium	0.326995	0.326995	0	0.326995
Bacteria_Entotheonellaeota_Entotheonellia_Entotheonellales_Entotheonellaceae	0.211139	0.211139	0	0.211139
Bacteria_Proteobacteria_Gammaproteobacteria_Cardiobacteriales_Cardiobacteriaceae	0.030768	0.030768	0	0.030768
Bacteria_Proteobacteria_Alphaproteobacteria_Rickettsiales_AB1	0.342282	0.342282	0	0.342282
Bacteria_Proteobacteria_Alphaproteobacteria_Rickettsiales_Midichloriaceae	0.265969	0.265969	0	0.265969
Bacteria_Proteobacteria_Alphaproteobacteria_Rhizobiales_Rhodobiaceae	0.154072	0.154072	0	0.154072
Bacteria_Proteobacteria_Alphaproteobacteria_Rhizobiales_uncultured	0.212902	0.212902	0	0.212902
Bacteria_Proteobacteria_Alphaproteobacteria_Azospirillales_Inquilinaceae	0.36566	0.36566	0	0.36566
Bacteria_Proteobacteria_Deltaproteobacteria_MBNT15_uncultured Geobacter sp.	0.204765	0.204765	0	0.204765
Bacteria_Proteobacteria_Gammaproteobacteria_Oceanospirillales_Marinomonadaceae	0.02573	0.02573	0	0.02573
Bacteria_Chloroflexi_Anaerolineae_MSB-5B2_uncultured Chloroflexi bacterium	0.348548	0.348548	0	0.348548
Bacteria_Proteobacteria_Gammaproteobacteria_Cellvibrionales_Spongiibacteraceae	0.072419	0.072419	0	0.072419
Bacteria_Patescibacteria_Saccharimonadia_Saccharimonadales_Saccharimonadaceae	0.866273	0.866273	0	0.866273
Bacteria_Nitrospirae_Thermodesulfovibrionia_uncultured_uncultured Sphingobacteriales bacterium	0.199106	0.199106	0	0.199106
Bacteria_Chloroflexi_Anaerolineae_SBR1031_uncultured Gemmatimonadetes bacterium	0.334746	0.334746	0	0.334746
Bacteria_Patescibacteria_Saccharimonadia_Saccharimonadales_uncultured organism	1.84874	1.84874	0	1.84874
Bacteria_Proteobacteria_Alphaproteobacteria_Rhizobiales_KF-JG30-B3	0.177611	0.177611	0	0.177611
Bacteria_Proteobacteria_Gammaproteobacteria_Steroidobacterales_Woeseiaceae	0.16378	0.16378	0	0.16378
Bacteria_Actinobacteria_Actinobacteria_Frankiales_Geodermatophilaceae	0.00015	0.00015	0	0.00015
Bacteria_Proteobacteria_Gammaproteobacteria_Beggiatoales_Beggiatoaceae	0.175267	0.175267	0	0.175267
